# Supplementary material for: Physiactisome: A New Nanovesicle Drug Containing Heat Shock Protein 60 for Treating Muscle Wasting and Cachexia
Source: MDPI journal article supplement (doi:10.3390/cells11091406), 2022-04-21
Supplement: s1 [file s1]

**Table S1.** Proteins with differences in relative abundances

| Accession | Description                                            | Avg. Mass | Ratio<br>Large:Small<br>EVS | P value   |
|-----------|--------------------------------------------------------|-----------|-----------------------------|-----------|
| P62806    | Histone H4                                             | 11367     | 0.03                        | 1.742E-03 |
| Q64475    | Histone H2B type 1-B                                   | 13952     | 0.03                        | 6.848E-06 |
| P11276    | Fibronectin                                            | 272536    | 0.05                        | 2.720E-06 |
| O08992    | Syntenin-1                                             | 32379     | 0.06                        | 1.201E-05 |
| Q9R045    | Angiopoietin-related protein 2                         | 57106     | 0.08                        | 4.433E-05 |
| Q8BVY0    | Ribosomal L1 domain-containing protein 1               | 50421     | 0.10                        | 1.857E-07 |
| P11440    | Cyclin-dependent kinase 1                              | 34107     | 0.10                        | 5.098E-04 |
| P68368    | Tubulin alpha-4A chain                                 | 49924     | 0.11                        | 7.574E-05 |
| P43276    | Histone H1.5 OS=Mus musculus                           | 22576     | 0.12                        | 1.941E-07 |
| Q61001    | Laminin subunit alpha-5                                | 404056    | 0.12                        | 3.375E-07 |
| Q9WU78    | Programmed cell death 6-interacting protein            | 96024     | 0.12                        | 4.572E-07 |
| Q8R366    | Immunoglobulin superfamily member 8                    | 65011     | 0.13                        | 1.679E-03 |
| Q61187    | Tumor susceptibility gene 101 protein                  | 44124     | 0.13                        | 7.457E-08 |
| Q9D1C8    | Vacuolar protein sorting-associated protein 28 homolog | 25452     | 0.13                        | 5.821E-06 |
| Q9Z204    | Heterogeneous nuclear ribonucleoproteins C1/C2         | 34385     | 0.14                        | 3.066E-05 |
| Q9QZ18    | Serine incorporator 1                                  | 50509     | 0.14                        | 4.400E-05 |
| Q6P5F7    | Protein tweety homolog 3                               | 57714     | 0.14                        | 3.612E-06 |
| E9PYK3    | Protein mono-ADP-ribosyltransferase PARP4              | 216131    | 0.15                        | 2.014E-04 |
| P62274    | 40S ribosomal protein S29                              | 6677      | 0.16                        | 9.961E-05 |
| Q9EQK5    | Major vault protein                                    | 95924     | 0.16                        | 7.912E-06 |
| Q8VEK3    | Heterogeneous nuclear ribonucleoprotein U              | 87918     | 0.16                        | 3.050E-04 |
| Q9WV91    | Prostaglandin F2 receptor negative regulator           | 98722     | 0.17                        | 9.962E-06 |
| P62281    | 40S ribosomal protein S11 OS=Mus musculus              | 18431     | 0.17                        | 6.823E-06 |
| Q9WVA3    | Mitotic checkpoint protein BUB3 OS=Mus musculus        | 36955     | 0.17                        | 2.399E-05 |
| P62242    | 40S ribosomal protein S8 OS=Mus musculus               | 24205     | 0.18                        | 6.334E-05 |
| P54775    | 26S proteasome regulatory subunit 6B                   | 47408     | 0.18                        | 2.447E-07 |
| Q6ZWU9    | 40S ribosomal protein S27                              | 9461      | 0.18                        | 1.026E-05 |
| Q6P4T2    | U5 small nuclear ribonucleoprotein 200 kDa helicase    | 244544    | 0.18                        | 1.427E-07 |

|        |                                                            |        |      |           |
|--------|------------------------------------------------------------|--------|------|-----------|
| P62855 | 40S ribosomal protein S26 OS=Mus musculus                  | 13015  | 0.19 | 1.572E-07 |
| P62196 | 26S proteasome regulatory subunit 8                        | 45626  | 0.19 | 2.083E-03 |
| P62267 | 40S ribosomal protein S23                                  | 15808  | 0.19 | 5.737E-05 |
| P62754 | 40S ribosomal protein S6 OS=Mus musculus                   | 28681  | 0.19 | 3.692E-05 |
| Q7TPV4 | Myb-binding protein 1A OS=Mus musculus                     | 152036 | 0.19 | 5.667E-06 |
| P14131 | 40S ribosomal protein S16 OS=Mus musculus                  | 16445  | 0.20 | 6.201E-06 |
| Q9CZX7 | Type 2 phosphatidylinositol 4 5-bisphosphate 4-phosphatase | 28038  | 0.20 | 1.801E-05 |
| B2RQC6 | CAD protein                                                | 243236 | 0.20 | 1.266E-04 |
| P62192 | 26S proteasome regulatory subunit 4                        | 49185  | 0.20 | 3.937E-04 |
| P25444 | 40S ribosomal protein S2                                   | 31231  | 0.21 | 7.067E-06 |
| P46471 | 26S proteasome regulatory subunit 7                        | 48648  | 0.21 | 2.128E-06 |
| P60843 | Eukaryotic initiation factor 4A-I                          | 46154  | 0.21 | 7.626E-06 |
| P68040 | Receptor of activated protein C kinase 1                   | 35077  | 0.21 | 4.289E-05 |
| Q3UH60 | Disco-interacting protein 2 homolog B                      | 171125 | 0.22 | 4.613E-03 |
| O70133 | ATP-dependent RNA helicase A                               | 149474 | 0.22 | 8.706E-04 |
| P60122 | RuvB-like 1                                                | 50214  | 0.22 | 1.669E-05 |
| P62334 | 26S proteasome regulatory subunit 10B                      | 44173  | 0.23 | 4.754E-05 |
| Q9WTM5 | RuvB-like 2                                                | 51113  | 0.23 | 1.143E-03 |
| Q6ZWN5 | 40S ribosomal protein S9                                   | 22591  | 0.23 | 3.767E-06 |
| P62245 | 40S ribosomal protein S15a                                 | 14840  | 0.23 | 1.004E-05 |
| O88685 | 26S proteasome regulatory subunit 6A                       | 49549  | 0.24 | 2.170E-06 |
| O08810 | 116 kDa U5 small nuclear ribonucleoprotein component       | 109361 | 0.24 | 5.256E-04 |
| Q8BH64 | EH domain-containing protein 2                             | 61175  | 0.24 | 3.728E-05 |
| P62702 | 40S ribosomal protein S4 X isoform                         | 29598  | 0.25 | 1.781E-06 |
| Q6ZWV3 | 60S ribosomal protein L10                                  | 24604  | 0.25 | 6.709E-06 |
| P07742 | Ribonucleoside-diphosphate reductase large subunit         | 90210  | 0.25 | 2.783E-04 |
| P62908 | 40S ribosomal protein S3                                   | 26674  | 0.25 | 2.164E-06 |
| O35286 | Pre-mRNA-splicing factor ATP-dependent RNA helicase DHX15  | 91007  | 0.25 | 2.846E-02 |
| P27659 | 60S ribosomal protein L3                                   | 46110  | 0.25 | 3.938E-05 |
| Q9EQP2 | EH domain-containing protein 4                             | 61481  | 0.25 | 3.405E-04 |
| Q9D8E6 | 60S ribosomal protein L4                                   | 47154  | 0.26 | 3.064E-05 |
| P32067 | Lupus La protein homolog                                   | 47756  | 0.26 | 1.136E-03 |

|        |                                                |        |      |           |
|--------|------------------------------------------------|--------|------|-----------|
| P47964 | 60S ribosomal protein L36                      | 12216  | 0.26 | 3.933E-05 |
| P80316 | T-complex protein 1 subunit epsilon            | 59624  | 0.26 | 2.290E-06 |
| O09167 | 60S ribosomal protein L21                      | 18562  | 0.27 | 3.609E-05 |
| Q3UDE2 | Tubulin--tyrosine ligase-like protein 12       | 74043  | 0.27 | 7.133E-05 |
| Q99LF4 | tRNA-splicing ligase RtcB homolog              | 55249  | 0.27 | 1.065E-04 |
| Q9ERD7 | Tubulin beta-3 chain                           | 50419  | 0.27 | 4.448E-04 |
| P62264 | 40S ribosomal protein S14                      | 16273  | 0.27 | 3.499E-05 |
| P62717 | 60S ribosomal protein L18a                     | 20732  | 0.28 | 1.618E-06 |
| P62911 | 60S ribosomal protein L32                      | 15860  | 0.28 | 7.856E-05 |
| Q62167 | ATP-dependent RNA helicase DDX3X               | 73102  | 0.28 | 1.192E-04 |
| Q921M3 | Splicing factor 3B subunit 3                   | 135550 | 0.28 | 1.914E-04 |
| Q8VDM4 | 26S proteasome non-ATPase regulatory subunit 2 | 100203 | 0.28 | 1.480E-05 |
| P16460 | Argininosuccinate synthase                     | 46585  | 0.29 | 1.216E-06 |
| Q9ESX5 | H/ACA ribonucleoprotein complex subunit DKC1   | 57402  | 0.29 | 1.910E-02 |
| P19253 | 60S ribosomal protein L13a                     | 23464  | 0.29 | 3.107E-06 |
| P80317 | T-complex protein 1 subunit zeta               | 58004  | 0.29 | 5.022E-05 |
| Q8QZY6 | Tetraspanin-14                                 | 30674  | 0.29 | 4.198E-04 |
| P97351 | 40S ribosomal protein S3a                      | 29885  | 0.29 | 2.089E-07 |
| P42932 | T-complex protein 1 subunit theta              | 59556  | 0.29 | 7.448E-06 |
| P62849 | 40S ribosomal protein S24                      | 15423  | 0.29 | 1.865E-04 |
| Q9CR57 | 60S ribosomal protein L14                      | 23564  | 0.30 | 4.723E-04 |
| P14206 | 40S ribosomal protein SA                       | 32838  | 0.30 | 1.140E-05 |
| Q99PV0 | Pre-mRNA-processing-splicing factor 8          | 273615 | 0.30 | 8.138E-04 |
| Q9CPR4 | 60S ribosomal protein L17                      | 21423  | 0.30 | 1.204E-04 |
| Q5SUF2 | Luc7-like protein 3                            | 51450  | 0.30 | 9.372E-05 |
| P62983 | Ubiquitin-40S ribosomal protein S27a           | 17951  | 0.31 | 3.124E-06 |
| P11983 | T-complex protein 1 subunit alpha              | 60449  | 0.31 | 1.909E-05 |
| P62270 | 40S ribosomal protein S18                      | 17719  | 0.31 | 4.988E-07 |
| P41105 | 60S ribosomal protein L28                      | 15733  | 0.32 | 3.300E-06 |
| Q9CZM2 | 60S ribosomal protein L15                      | 24146  | 0.32 | 7.415E-06 |
| P63037 | DnaJ homolog subfamily A member 1              | 44868  | 0.32 | 1.827E-04 |
| P62827 | GTP-binding nuclear protein Ran                | 24423  | 0.32 | 5.141E-07 |

|        |                                                                |        |      |           |
|--------|----------------------------------------------------------------|--------|------|-----------|
| P08030 | Adenine phosphoribosyltransferase                              | 19724  | 0.32 | 2.674E-04 |
| P30999 | Catenin delta-1                                                | 104925 | 0.32 | 1.111E-03 |
| P80314 | T-complex protein 1 subunit beta                               | 57477  | 0.32 | 2.186E-06 |
| Q9JIZ9 | Phospholipid scramblase 3                                      | 31803  | 0.32 | 2.876E-06 |
| Q8BP67 | 60S ribosomal protein L24                                      | 17779  | 0.33 | 1.414E-05 |
| P68372 | Tubulin beta-4B chain                                          | 49831  | 0.33 | 5.592E-05 |
| Q9CYI4 | Putative RNA-binding protein Luc7-like 1                       | 43934  | 0.33 | 4.280E-04 |
| P61358 | 60S ribosomal protein L27                                      | 15798  | 0.34 | 7.007E-03 |
| Q61656 | Probable ATP-dependent RNA helicase DDX5                       | 69290  | 0.34 | 2.645E-06 |
| Q9WVK4 | EH domain-containing protein 1                                 | 60603  | 0.34 | 5.190E-04 |
| P62889 | 60S ribosomal protein L30                                      | 12784  | 0.34 | 3.217E-05 |
| P47963 | 60S ribosomal protein L13                                      | 24305  | 0.34 | 3.442E-06 |
| Q35682 | Myeloid-associated differentiation marker                      | 35285  | 0.34 | 2.774E-04 |
| P60867 | 40S ribosomal protein S20                                      | 13373  | 0.35 | 2.748E-05 |
| P62301 | 40S ribosomal protein S13                                      | 17222  | 0.35 | 2.750E-04 |
| P12970 | 60S ribosomal protein L7a                                      | 29977  | 0.35 | 3.011E-06 |
| P14869 | 60S acidic ribosomal protein P0                                | 34216  | 0.35 | 3.446E-04 |
| P99024 | Tubulin beta-5 chain                                           | 49671  | 0.36 | 3.329E-04 |
| Q8R081 | Heterogeneous nuclear ribonucleoprotein L                      | 63964  | 0.36 | 7.570E-04 |
| P14115 | 60S ribosomal protein L27a                                     | 16605  | 0.36 | 5.060E-03 |
| P62315 | Small nuclear ribonucleoprotein Sm D1                          | 13282  | 0.36 | 2.943E-04 |
| P14148 | 60S ribosomal protein L7                                       | 31420  | 0.36 | 9.123E-04 |
| Q99NB9 | Splicing factor 3B subunit 1                                   | 145816 | 0.36 | 8.207E-04 |
| P84099 | 60S ribosomal protein L19                                      | 23466  | 0.36 | 1.762E-05 |
| P23927 | Alpha-crystallin B chain                                       | 20069  | 0.36 | 2.379E-05 |
| P47911 | 60S ribosomal protein L6                                       | 33510  | 0.36 | 1.544E-04 |
| Q9Z1Q9 | Valine--tRNA ligase                                            | 140215 | 0.36 | 1.716E-04 |
| P62852 | 40S ribosomal protein S25                                      | 13742  | 0.37 | 4.916E-05 |
| Q35598 | Disintegrin and metalloproteinase domain-containing protein 10 | 83968  | 0.37 | 1.727E-04 |
| Q35593 | 26S proteasome non-ATPase regulatory subunit 14                | 34577  | 0.37 | 8.055E-05 |
| Q9D8W5 | 26S proteasome non-ATPase regulatory subunit 12                | 52895  | 0.37 | 3.891E-03 |
| Q7TNC4 | Putative RNA-binding protein Luc7-like 2                       | 46583  | 0.37 | 2.149E-04 |

|        |                                                                  |        |      |           |
|--------|------------------------------------------------------------------|--------|------|-----------|
| P80318 | T-complex protein 1 subunit gamma                                | 60630  | 0.38 | 6.921E-05 |
| P35979 | 60S ribosomal protein L12                                        | 17805  | 0.38 | 5.043E-06 |
| Q8BG32 | 26S proteasome non-ATPase regulatory subunit 11                  | 47437  | 0.38 | 4.579E-06 |
| P62918 | 60S ribosomal protein L8                                         | 28025  | 0.38 | 4.967E-06 |
| P12815 | Programmed cell death protein 6                                  | 21867  | 0.38 | 8.601E-04 |
| Q6A0A9 | Constitutive coactivator of PPAR-gamma-like protein 1            | 121646 | 0.39 | 1.338E-02 |
| P80315 | T-complex protein 1 subunit delta                                | 58066  | 0.39 | 2.666E-06 |
| P80313 | T-complex protein 1 subunit eta                                  | 59652  | 0.40 | 1.427E-06 |
| Q9QYJ0 | DnaJ homolog subfamily A member 2                                | 45746  | 0.40 | 6.173E-04 |
| P97461 | 40S ribosomal protein S5                                         | 22889  | 0.40 | 1.465E-06 |
| P23242 | Gap junction alpha-1 protein                                     | 43004  | 0.40 | 4.548E-04 |
| P57784 | U2 small nuclear ribonucleoprotein A'                            | 28357  | 0.40 | 2.347E-02 |
| Q9CQW9 | Interferon-induced transmembrane protein 3                       | 14954  | 0.40 | 2.878E-03 |
| Q3TXS7 | 26S proteasome non-ATPase regulatory subunit 1                   | 105730 | 0.40 | 2.968E-05 |
| P62843 | 40S ribosomal protein S15                                        | 17040  | 0.40 | 3.602E-05 |
| Q9JHU4 | Cytoplasmic dynein 1 heavy chain 1                               | 532050 | 0.41 | 1.691E-04 |
| P62137 | Serine/threonine-protein phosphatase PP1-alpha catalytic subunit | 37540  | 0.41 | 1.519E-03 |
| P12382 | ATP-dependent 6-phosphofructokinase liver type                   | 85360  | 0.41 | 1.939E-03 |
| P63276 | 40S ribosomal protein S17                                        | 15524  | 0.43 | 2.775E-05 |
| P06869 | Urokinase-type plasminogen activator                             | 48268  | 0.43 | 7.282E-05 |
| Q922D8 | C-1-tetrahydrofolate synthase cytoplasmic                        | 101200 | 0.43 | 2.812E-04 |
| Q8BU30 | Isoleucine--tRNA ligase cytoplasmic                              | 144270 | 0.43 | 2.277E-03 |
| P26516 | 26S proteasome non-ATPase regulatory subunit 7                   | 36540  | 0.43 | 3.803E-03 |
| Q8BMJ2 | Leucine--tRNA ligase cytoplasmic                                 | 134192 | 0.43 | 1.481E-04 |
| Q8BP47 | Asparagine--tRNA ligase cytoplasmic                              | 64279  | 0.44 | 2.226E-04 |
| Q9JJ00 | Phospholipid scramblase 1                                        | 35914  | 0.44 | 2.585E-04 |
| Q8CGC7 | Bifunctional glutamate/proline--tRNA ligase                      | 170078 | 0.45 | 2.811E-04 |
| Q6PDI5 | Proteasome adapter and scaffold protein ECM29                    | 203702 | 0.45 | 5.396E-03 |
| Q68FL6 | Methionine--tRNA ligase cytoplasmic                              | 101431 | 0.45 | 1.280E-02 |
| Q9Z1Z2 | Serine-threonine kinase receptor-associated protein              | 38442  | 0.45 | 2.417E-04 |
| O35737 | Heterogeneous nuclear ribonucleoprotein H                        | 49199  | 0.46 | 1.626E-03 |
| P47962 | 60S ribosomal protein L5                                         | 34401  | 0.46 | 2.290E-05 |

|        |                                                                  |        |      |           |
|--------|------------------------------------------------------------------|--------|------|-----------|
| P62305 | Small nuclear ribonucleoprotein E                                | 10804  | 0.46 | 1.723E-03 |
| Q9WVJ2 | 26S proteasome non-ATPase regulatory subunit 13                  | 42809  | 0.46 | 1.303E-02 |
| Q9CXW4 | 60S ribosomal protein L11                                        | 20252  | 0.46 | 1.106E-02 |
| P35762 | CD81 antigen                                                     | 25815  | 0.46 | 2.123E-03 |
| P40237 | CD82 antigen                                                     | 29629  | 0.47 | 1.394E-04 |
| P62830 | 60S ribosomal protein L23                                        | 14865  | 0.47 | 1.602E-04 |
| O70194 | Eukaryotic translation initiation factor 3 subunit D             | 63989  | 0.47 | 1.142E-03 |
| P28271 | Cytoplasmic aconitate hydratase                                  | 98126  | 0.47 | 2.097E-03 |
| P63325 | 40S ribosomal protein S10                                        | 18916  | 0.47 | 4.824E-05 |
| Q8CIE6 | Coatomer subunit alpha                                           | 138432 | 0.48 | 2.115E-04 |
| P35980 | 60S ribosomal protein L18                                        | 21645  | 0.48 | 2.743E-02 |
| Q8BY89 | Choline transporter-like protein 2                               | 80110  | 0.50 | 1.039E-04 |
| P97447 | Four and a half LIM domains protein 1                            | 31889  | 2.00 | 3.494E-05 |
| Q9EPL8 | Importin-7                                                       | 119486 | 2.00 | 1.161E-03 |
| Q9QYB1 | Chloride intracellular channel protein 4                         | 28729  | 2.04 | 1.918E-05 |
| P11499 | Heat shock protein HSP 90-beta                                   | 83281  | 2.04 | 6.978E-05 |
| Q3U1J4 | DNA damage-binding protein 1                                     | 126853 | 2.04 | 1.216E-03 |
| P62874 | Guanine nucleotide-binding protein G(I)/G(S)/G(T) subunit beta-1 | 37377  | 2.08 | 8.512E-05 |
| Q7TMS5 | ATP-binding cassette sub-family G member 2                       | 72978  | 2.08 | 1.927E-04 |
| Q9DBG3 | AP-2 complex subunit beta                                        | 104583 | 2.08 | 3.511E-04 |
| O54724 | Caveolae-associated protein 1                                    | 43954  | 2.08 | 2.224E-02 |
| Q8BTM8 | Filamin-A                                                        | 281219 | 2.13 | 4.941E-05 |
| Q62351 | Transferrin receptor protein 1                                   | 85731  | 2.13 | 1.877E-04 |
| P62962 | Profilin-1                                                       | 14957  | 2.13 | 6.624E-04 |
| Q921F2 | TAR DNA-binding protein 43                                       | 44548  | 2.13 | 4.387E-03 |
| P30416 | Peptidyl-prolyl cis-trans isomerase FKBP4                        | 51572  | 2.13 | 3.727E-02 |
| Q920A5 | Retinoid-inducible serine carboxypeptidase                       | 50965  | 2.17 | 2.425E-04 |
| Q8BWY3 | Eukaryotic peptide chain release factor subunit 1                | 49031  | 2.22 | 1.339E-05 |
| Q75N73 | Zinc transporter ZIP14                                           | 53962  | 2.22 | 1.555E-04 |
| Q91ZJ5 | UTP--glucose-1-phosphate uridylyltransferase                     | 56979  | 2.22 | 3.949E-04 |
| P26040 | Ezrin                                                            | 69407  | 2.22 | 7.972E-04 |
| O88456 | Calpain small subunit 1                                          | 28463  | 2.22 | 2.249E-03 |

|        |                                                                  |        |      |           |
|--------|------------------------------------------------------------------|--------|------|-----------|
| Q64514 | Tripeptidyl-peptidase 2                                          | 139878 | 2.22 | 2.103E-02 |
| Q9WUM3 | Coronin-1B                                                       | 53912  | 2.27 | 2.123E-05 |
| Q91YE6 | Importin-9                                                       | 116052 | 2.27 | 5.377E-05 |
| P70349 | Histidine triad nucleotide-binding protein 1                     | 13777  | 2.27 | 1.092E-03 |
| P63024 | Vesicle-associated membrane protein 3                            | 11480  | 2.27 | 4.234E-03 |
| P62880 | Guanine nucleotide-binding protein G(I)/G(S)/G(T) subunit beta-2 | 37331  | 2.27 | 4.562E-03 |
| O35639 | Annexin A3                                                       | 36384  | 2.33 | 6.069E-05 |
| P63242 | Eukaryotic translation initiation factor 5A-1                    | 16832  | 2.33 | 1.284E-04 |
| Q9R0P5 | Destrin                                                          | 18522  | 2.33 | 2.071E-04 |
| O54890 | Integrin beta-3                                                  | 86738  | 2.33 | 2.494E-04 |
| P43406 | Integrin alpha-V                                                 | 115360 | 2.33 | 2.997E-04 |
| P10852 | 4F2 cell-surface antigen heavy chain                             | 58337  | 2.33 | 3.625E-04 |
| Q60634 | Flotillin-2                                                      | 47038  | 2.33 | 5.245E-04 |
| Q61171 | Peroxiredoxin-2                                                  | 21779  | 2.33 | 1.113E-03 |
| P21278 | Guanine nucleotide-binding protein subunit alpha-11              | 42024  | 2.33 | 2.322E-03 |
| Q80UG5 | Septin-9                                                         | 65575  | 2.33 | 3.721E-03 |
| P49312 | Heterogeneous nuclear ribonucleoprotein A1                       | 34196  | 2.33 | 1.584E-02 |
| P35700 | Peroxiredoxin-1                                                  | 22176  | 2.38 | 1.999E-05 |
| P58242 | Acid sphingomyelinase-like phosphodiesterase 3b                  | 51600  | 2.38 | 2.305E-04 |
| P68510 | 14-3-3 protein eta                                               | 28212  | 2.38 | 2.339E-04 |
| P13595 | Neural cell adhesion molecule 1                                  | 119427 | 2.38 | 2.145E-03 |
| Q8VBV7 | COP9 signalosome complex subunit 8                               | 23256  | 2.38 | 5.622E-03 |
| Q8BWM0 | Prostaglandin E synthase 2                                       | 43324  | 2.44 | 1.925E-05 |
| Q61553 | Fascin                                                           | 54508  | 2.44 | 2.263E-05 |
| P63028 | Translationally-controlled tumor protein                         | 19462  | 2.44 | 1.770E-04 |
| P21995 | Emigin                                                           | 37064  | 2.44 | 2.355E-04 |
| Q62433 | Protein NDRG1                                                    | 43009  | 2.44 | 6.878E-04 |
| P57716 | Nicastrin                                                        | 78492  | 2.44 | 3.355E-03 |
| Q11011 | Puromycin-sensitive aminopeptidase                               | 103325 | 2.44 | 5.727E-03 |
| Q60854 | Serpin B6                                                        | 42599  | 2.50 | 9.081E-06 |
| P26041 | Moesin                                                           | 67767  | 2.50 | 2.390E-05 |
| P53994 | Ras-related protein Rab-2A                                       | 23548  | 2.50 | 3.492E-05 |

|        |                                                                  |        |      |           |
|--------|------------------------------------------------------------------|--------|------|-----------|
| P07091 | Protein S100-A4                                                  | 11721  | 2.50 | 4.775E-05 |
| Q9D819 | Inorganic pyrophosphatase                                        | 32667  | 2.50 | 3.875E-04 |
| Q9CQE8 | RNA transcription translation and transport factor protein       | 28152  | 2.50 | 2.325E-02 |
| Q69ZN7 | Myoferlin                                                        | 233322 | 2.56 | 1.128E-07 |
| P17809 | Solute carrier family 2 facilitated glucose transporter member 1 | 53985  | 2.56 | 8.645E-07 |
| Q62465 | Synaptic vesicle membrane protein VAT-1 homolog                  | 43097  | 2.56 | 1.032E-05 |
| Q9Z127 | Large neutral amino acids transporter small subunit 1            | 55872  | 2.56 | 1.145E-04 |
| P68254 | 14-3-3 protein theta                                             | 27778  | 2.56 | 2.129E-04 |
| P18572 | Basigin                                                          | 42445  | 2.56 | 4.821E-04 |
| P63321 | Ras-related protein Ral-A                                        | 23553  | 2.56 | 2.618E-03 |
| P28667 | MARCKS-related protein                                           | 20165  | 2.63 | 1.340E-05 |
| P57776 | Elongation factor 1-delta                                        | 31293  | 2.63 | 2.163E-05 |
| Q9R1Q7 | Proteolipid protein 2                                            | 16608  | 2.63 | 8.958E-05 |
| O09117 | Synaptophysin-like protein 1                                     | 28899  | 2.63 | 3.277E-04 |
| P24452 | Macrophage-capping protein                                       | 39240  | 2.63 | 3.993E-04 |
| P50543 | Protein S100-A11                                                 | 11083  | 2.70 | 4.118E-06 |
| P63101 | 14-3-3 protein zeta/delta                                        | 27771  | 2.70 | 9.602E-06 |
| Q99L47 | Hsc70-interacting protein                                        | 41656  | 2.70 | 1.348E-05 |
| Q61490 | CD166 antigen                                                    | 65092  | 2.70 | 9.407E-05 |
| G5E829 | Plasma membrane calcium-transporting ATPase 1                    | 134747 | 2.70 | 1.613E-04 |
| Q9DCT8 | Cysteine-rich protein 2                                          | 22727  | 2.70 | 6.220E-04 |
| P46061 | Ran GTPase-activating protein 1                                  | 63531  | 2.70 | 7.196E-04 |
| O88792 | Junctional adhesion molecule A                                   | 32424  | 2.70 | 8.849E-03 |
| P16045 | Galectin-1                                                       | 14866  | 2.78 | 7.614E-06 |
| P39447 | Tight junction protein ZO-1                                      | 194740 | 2.78 | 1.986E-05 |
| P56399 | Ubiquitin carboxyl-terminal hydrolase 5                          | 95833  | 2.78 | 3.959E-05 |
| O88342 | WD repeat-containing protein 1                                   | 66407  | 2.78 | 5.138E-05 |
| Q9CQM9 | Glutaredoxin-3                                                   | 37778  | 2.78 | 8.721E-05 |
| Q9WVA4 | Transgelin-2                                                     | 22395  | 2.78 | 1.103E-04 |
| Q62523 | Zyxin                                                            | 60546  | 2.78 | 1.134E-04 |
| P34884 | Macrophage migration inhibitory factor                           | 12504  | 2.78 | 1.300E-04 |
| Q9CY58 | Plasminogen activator inhibitor 1 RNA-binding protein            | 44714  | 2.78 | 1.393E-04 |



|        |                                                                           |        |      |           |
|--------|---------------------------------------------------------------------------|--------|------|-----------|
| Q8R422 | CD109 antigen                                                             | 161658 | 2.78 | 1.621E-04 |
| Q99K51 | Plastin-3                                                                 | 70742  | 2.78 | 2.194E-04 |
| Q99PT1 | Rho GDP-dissociation inhibitor 1                                          | 23407  | 2.78 | 3.636E-04 |
| Q61598 | Rab GDP dissociation inhibitor beta                                       | 50537  | 2.86 | 8.770E-06 |
| P48036 | Annexin A5                                                                | 35752  | 2.86 | 9.324E-06 |
| P53986 | Monocarboxylate transporter 1                                             | 53267  | 2.86 | 1.764E-04 |
| Q61165 | Sodium/hydrogen exchanger 1                                               | 91468  | 2.86 | 5.112E-04 |
| Q99MN1 | Lysine--tRNA ligase                                                       | 67840  | 2.86 | 1.354E-03 |
| Q62426 | Cystatin-B                                                                | 11046  | 2.86 | 1.467E-02 |
| P17742 | Peptidyl-prolyl cis-trans isomerase A                                     | 17971  | 2.94 | 2.186E-05 |
| P07901 | Heat shock protein HSP 90-alpha                                           | 84788  | 2.94 | 3.340E-05 |
| Q62188 | Dihydropyrimidinase-related protein 3                                     | 61936  | 2.94 | 4.359E-05 |
| P62259 | 14-3-3 protein epsilon                                                    | 29174  | 2.94 | 5.337E-05 |
| P18242 | Cathepsin D                                                               | 44954  | 2.94 | 1.252E-04 |
| Q62261 | Spectrin beta chain non-erythrocytic 1                                    | 274221 | 2.94 | 2.225E-04 |
| Q8C129 | Leucyl-cystinyl aminopeptidase                                            | 117304 | 2.94 | 8.490E-04 |
| P29533 | Vascular cell adhesion protein 1                                          | 81317  | 2.94 | 9.972E-04 |
| P17182 | Alpha-enolase                                                             | 47141  | 2.94 | 1.054E-03 |
| P70670 | Nascent polypeptide-associated complex subunit alpha muscle-specific form | 220497 | 3.03 | 7.108E-07 |
| P10639 | Thioredoxin                                                               | 11675  | 3.03 | 3.520E-06 |
| Q64727 | Vinculin                                                                  | 116717 | 3.03 | 7.134E-05 |
| P46638 | Ras-related protein Rab-11B                                               | 24489  | 3.03 | 1.756E-04 |
| Q921M7 | Protein FAM49B                                                            | 36776  | 3.03 | 8.879E-04 |
| Q6Q477 | Plasma membrane calcium-transporting ATPase 4                             | 133068 | 3.03 | 2.018E-03 |
| P0DP26 | Calmodulin-1                                                              | 16838  | 3.13 | 2.612E-06 |
| P0DP27 | Calmodulin-2                                                              | 16838  | 3.13 | 2.612E-06 |
| P0DP28 | Calmodulin-3                                                              | 16838  | 3.13 | 2.612E-06 |
| Q9DBJ1 | Phosphoglycerate mutase 1                                                 | 28832  | 3.13 | 2.415E-05 |
| Q8BKC5 | Importin-5                                                                | 123591 | 3.13 | 6.257E-05 |
| P17751 | Triosephosphate isomerase                                                 | 32192  | 3.23 | 2.350E-05 |
| P18760 | Cofilin-1                                                                 | 18560  | 3.23 | 2.575E-05 |

|        |                                                       |        |      |           |
|--------|-------------------------------------------------------|--------|------|-----------|
| Q8R1F1 | Niban-like protein 1                                  | 84819  | 3.23 | 5.661E-05 |
| Q9D0F9 | Phosphoglucomutase-1                                  | 61418  | 3.23 | 2.530E-04 |
| O08539 | Myc box-dependent-interacting protein 1               | 64470  | 3.23 | 3.409E-04 |
| Q6ZQ38 | Cullin-associated NEDD8-dissociated protein 1         | 136331 | 3.23 | 9.168E-04 |
| Q8C1A5 | Thimet oligopeptidase                                 | 78026  | 3.23 | 1.153E-03 |
| Q62348 | Translin                                              | 26201  | 3.23 | 1.467E-03 |
| Q9EPR5 | VPS10 domain-containing receptor SorCS2               | 128902 | 3.23 | 1.094E-02 |
| Q99020 | Heterogeneous nuclear ribonucleoprotein A/B           | 30831  | 3.33 | 2.052E-06 |
| P68037 | Ubiquitin-conjugating enzyme E2 L3                    | 17862  | 3.33 | 7.410E-05 |
| P0CW02 | Lymphocyte antigen 6C1                                | 14192  | 3.33 | 1.096E-04 |
| P26645 | Myristoylated alanine-rich C-kinase substrate         | 29661  | 3.33 | 1.680E-04 |
| P10107 | Annexin A1                                            | 38734  | 3.45 | 5.041E-08 |
| P40124 | Adenylyl cyclase-associated protein 1                 | 51565  | 3.45 | 8.866E-05 |
| O08709 | Peroxiredoxin-6                                       | 24871  | 3.45 | 1.411E-04 |
| O88844 | Isocitrate dehydrogenase [NADP] cytoplasmic           | 46674  | 3.45 | 2.326E-04 |
| Q05816 | Fatty acid-binding protein 5                          | 15137  | 3.45 | 1.170E-03 |
| P97300 | Neuroplastin                                          | 44373  | 3.57 | 2.794E-05 |
| P61982 | 14-3-3 protein gamma                                  | 28303  | 3.57 | 4.292E-05 |
| Q8VDD8 | WASH complex subunit 1                                | 51659  | 3.57 | 1.500E-04 |
| Q61316 | Heat shock 70 kDa protein 4                           | 94133  | 3.57 | 1.532E-04 |
| Q9JM76 | Actin-related protein 2/3 complex subunit 3           | 20525  | 3.57 | 1.317E-03 |
| Q80X90 | Filamin-B                                             | 277822 | 3.70 | 2.455E-06 |
| Q9CXW3 | Calcyclin-binding protein                             | 26510  | 3.70 | 5.959E-06 |
| Q8VDN2 | Sodium/potassium-transporting ATPase subunit alpha-1  | 112982 | 3.70 | 1.633E-05 |
| Q9CZU6 | Citrate synthase mitochondrial                        | 51737  | 3.70 | 2.464E-05 |
| P97370 | Sodium/potassium-transporting ATPase subunit beta-3   | 31776  | 3.70 | 8.105E-05 |
| O70251 | Elongation factor 1-beta                              | 24694  | 3.70 | 9.635E-05 |
| P97315 | Cysteine and glycine-rich protein 1                   | 20583  | 3.70 | 1.130E-04 |
| P05132 | cAMP-dependent protein kinase catalytic subunit alpha | 40571  | 3.70 | 1.193E-03 |
| Q78ZA7 | Nucleosome assembly protein 1-like 4                  | 42679  | 3.70 | 4.558E-03 |
| P06801 | NADP-dependent malic enzyme                           | 63954  | 3.70 | 2.097E-02 |
| Q99LT0 | Protein dpy-30 homolog                                | 11213  | 3.85 | 4.135E-05 |

|        |                                                     |        |      |           |
|--------|-----------------------------------------------------|--------|------|-----------|
| Q920E5 | Farnesyl pyrophosphate synthase                     | 40582  | 3.85 | 5.873E-05 |
| P06745 | Glucose-6-phosphate isomerase                       | 62767  | 3.85 | 6.030E-05 |
| Q9CR16 | Peptidyl-prolyl cis-trans isomerase D               | 40743  | 3.85 | 5.573E-04 |
| Q9CVB6 | Actin-related protein 2/3 complex subunit 2         | 34357  | 3.85 | 3.472E-03 |
| P05064 | Fructose-bisphosphate aldolase A                    | 39356  | 4.00 | 2.298E-06 |
| P48678 | Prelamin-A/C                                        | 74238  | 4.00 | 7.751E-06 |
| Q99K85 | Phosphoserine aminotransferase                      | 40473  | 4.00 | 1.600E-05 |
| P06151 | L-lactate dehydrogenase A chain                     | 36499  | 4.00 | 3.881E-05 |
| P26043 | Radixin                                             | 68543  | 4.00 | 4.216E-05 |
| P97855 | Ras GTPase-activating protein-binding protein 1     | 51829  | 4.00 | 9.600E-05 |
| Q9D1D4 | Transmembrane emp24 domain-containing protein 10    | 24911  | 4.00 | 2.057E-04 |
| Q64152 | Transcription factor BTF3                           | 22031  | 4.00 | 4.025E-04 |
| P61087 | Ubiquitin-conjugating enzyme E2 K                   | 22407  | 4.00 | 1.844E-03 |
| Q60932 | Voltage-dependent anion-selective channel protein 1 | 32351  | 4.00 | 3.851E-03 |
| Q60864 | Stress-induced-phosphoprotein 1                     | 62582  | 4.17 | 1.649E-05 |
| Q9JKF1 | Ras GTPase-activating-like protein IQGAP1           | 188741 | 4.17 | 1.892E-05 |
| Q60767 | Lymphocyte antigen 75                               | 197351 | 4.17 | 5.467E-05 |
| P99029 | Peroxiredoxin-5 mitochondrial                       | 21897  | 4.17 | 1.111E-04 |
| Q9CPU0 | Lactoylglutathione lyase                            | 20810  | 4.17 | 9.194E-04 |
| P63280 | SUMO-conjugating enzyme UBC9                        | 18007  | 4.35 | 2.600E-05 |
| Q8CAY6 | Acetyl-CoA acetyltransferase cytosolic              | 41298  | 4.35 | 6.126E-05 |
| O35685 | Nuclear migration protein nudC                      | 38358  | 4.35 | 6.160E-05 |
| Q9D379 | Epoxide hydrolase 1                                 | 52577  | 4.35 | 6.464E-05 |
| Q60930 | Voltage-dependent anion-selective channel protein 2 | 31733  | 4.35 | 4.191E-04 |
| O35379 | Multidrug resistance-associated protein 1           | 171184 | 4.35 | 2.756E-03 |
| Q01768 | Nucleoside diphosphate kinase B                     | 17363  | 4.55 | 1.207E-07 |
| Q9DCD0 | 6-phosphogluconate dehydrogenase decarboxylating    | 53247  | 4.55 | 1.642E-06 |
| Q9WUM4 | Coronin-1C OS=Mus musculus                          | 53121  | 4.55 | 1.728E-06 |
| P48999 | Arachidonate 5-lipoxygenase                         | 77967  | 4.55 | 2.903E-05 |
| O09131 | Glutathione S-transferase omega-1                   | 27498  | 4.55 | 5.986E-05 |
| Q9DCN2 | NADH-cytochrome b5 reductase 3                      | 34128  | 4.55 | 9.941E-04 |
| P10518 | Delta-aminolevulinic acid dehydratase               | 36024  | 4.76 | 1.926E-06 |

|        |                                                                    |        |       |           |
|--------|--------------------------------------------------------------------|--------|-------|-----------|
| P45591 | Cofilin-2                                                          | 18710  | 4.76  | 1.970E-05 |
| P08228 | Superoxide dismutase [Cu-Zn]                                       | 15943  | 4.76  | 4.914E-05 |
| Q9CXP8 | Guanine nucleotide-binding protein G(I)/G(S)/G(O) subunit gamma-10 | 7229   | 4.76  | 1.801E-04 |
| Q6P5H2 | Nestin                                                             | 207122 | 4.76  | 3.337E-04 |
| Q35640 | Annexin A8                                                         | 36724  | 5.00  | 6.747E-05 |
| Q8R5J9 | PRA1 family protein 3                                              | 21558  | 5.00  | 1.989E-04 |
| P14873 | Microtubule-associated protein 1B                                  | 270252 | 5.26  | 1.133E-06 |
| Q9CZN7 | Serine hydroxymethyltransferase mitochondrial                      | 55759  | 5.26  | 1.281E-03 |
| P42208 | Septin-2                                                           | 41526  | 5.56  | 2.119E-04 |
| Q9R1J0 | Sterol-4-alpha-carboxylate 3-dehydrogenase decarboxylating         | 40686  | 5.56  | 5.231E-04 |
| Q9JJU8 | SH3 domain-binding glutamic acid-rich-like protein                 | 12811  | 5.56  | 5.962E-04 |
| Q99P72 | Reticulon-4                                                        | 126613 | 5.88  | 4.330E-06 |
| P57780 | Alpha-actinin-4                                                    | 104977 | 5.88  | 4.922E-06 |
| P24472 | Glutathione S-transferase A4                                       | 25564  | 5.88  | 4.695E-05 |
| P21550 | Beta-enolase                                                       | 47025  | 5.88  | 5.314E-05 |
| Q7TPR4 | Alpha-actinin-1                                                    | 103068 | 5.88  | 6.143E-05 |
| Q9JMH6 | Thioredoxin reductase 1 cytoplasmic                                | 67084  | 6.25  | 5.896E-06 |
| Q8C1B7 | Septin-11                                                          | 49695  | 6.25  | 1.844E-05 |
| Q7M6Y3 | Phosphatidylinositol-binding clathrin assembly protein             | 71543  | 6.25  | 3.113E-05 |
| Q99KI0 | Aconitate hydratase mitochondrial                                  | 85464  | 6.25  | 3.440E-05 |
| Q9CR60 | Vesicle transport protein GOT1B                                    | 15422  | 6.67  | 1.254E-05 |
| P16546 | Spectrin alpha chain non-erythrocytic 1                            | 284596 | 6.67  | 1.126E-04 |
| Q9WTQ5 | A-kinase anchor protein 12                                         | 180694 | 6.67  | 2.184E-03 |
| P47791 | Glutathione reductase mitochondrial                                | 53663  | 7.69  | 3.158E-04 |
| Q3U7R1 | Extended synaptotagmin-1                                           | 121553 | 8.33  | 2.035E-06 |
| P38647 | Stress-70 protein mitochondrial                                    | 73461  | 8.33  | 3.254E-05 |
| Q6IRU2 | Tropomyosin alpha-4 chain                                          | 28468  | 9.09  | 1.076E-04 |
| P21107 | Tropomyosin alpha-3 chain                                          | 32994  | 11.11 | 3.437E-07 |
| P19324 | Serpin H1                                                          | 46534  | 11.11 | 1.771E-05 |
| P35564 | Calnexin                                                           | 67278  | 11.11 | 6.595E-05 |
| P09103 | Protein disulfide-isomerase                                        | 57059  | 12.50 | 3.149E-04 |
| Q922R8 | Protein disulfide-isomerase A6                                     | 48100  | 14.29 | 1.454E-04 |

|        |                                                                          |       |       |           |
|--------|--------------------------------------------------------------------------|-------|-------|-----------|
| P08113 | Endoplasmin                                                              | 92476 | 16.67 | 2.082E-06 |
| P08249 | Malate dehydrogenase mitochondrial                                       | 35611 | 16.67 | 1.380E-05 |
| P14211 | Calreticulin                                                             | 47995 | 16.67 | 6.940E-05 |
| P20029 | Endoplasmic reticulum chaperone BiP                                      | 72422 | 20.00 | 7.941E-07 |
| P27773 | Protein disulfide-isomerase A3                                           | 56678 | 20.00 | 2.271E-05 |
| P63038 | 60 kDa heat shock protein mitochondrial                                  | 60956 | 25.00 | 2.946E-06 |
| Q9DBG6 | Dolichyl-diphosphooligosaccharide--protein glycosyltransferase subunit 2 | 69063 | 25.00 | 2.886E-05 |
| P56480 | ATP synthase subunit beta mitochondrial                                  | 56301 | 33.33 | 1.264E-05 |
| Q64433 | 10 kDa heat shock protein mitochondrial                                  | 10963 | 33.33 | 1.891E-05 |
| Q91W90 | Thioredoxin domain-containing protein 5                                  | 46416 | 33.33 | 4.098E-05 |

**Table S2.** Proteins Common to Large and Small Evs without differences in relative abundances

| Accession | Description                                                       | Avg. Mass |
|-----------|-------------------------------------------------------------------|-----------|
| Q8VDP3    | [F-actin]-monooxygenase MICAL1                                    | 116785    |
| Q9CQV8    | 14-3-3 protein beta/alpha                                         | 28086     |
| P51432    | 1-phosphatidylinositol 4 5-bisphosphate phosphodiesterase beta-3  | 139487    |
| Q8R3B1    | 1-phosphatidylinositol 4 5-bisphosphate phosphodiesterase delta-1 | 85873     |
| P14685    | 26S proteasome non-ATPase regulatory subunit 3                    | 60718     |
| O35226    | 26S proteasome non-ATPase regulatory subunit 4                    | 40704     |
| Q8BJY1    | 26S proteasome non-ATPase regulatory subunit 5                    | 55972     |
| Q99JI4    | 26S proteasome non-ATPase regulatory subunit 6                    | 45536     |
| Q9CX56    | 26S proteasome non-ATPase regulatory subunit 8                    | 39930     |
| Q921H8    | 3-ketoacyl-CoA thiolase A peroxisomal                             | 43953     |
| P63323    | 40S ribosomal protein S12                                         | 14525     |
| Q9CZX8    | 40S ribosomal protein S19                                         | 16085     |
| Q9CQR2    | 40S ribosomal protein S21                                         | 9141      |
| P62862    | 40S ribosomal protein S30                                         | 6648      |
| P62867    | 40S ribosomal protein S30                                         | 6648      |
| P62082    | 40S ribosomal protein S7                                          | 22127     |
| Q9JM14    | 5'(3')-deoxyribonucleotidase cytosolic type                       | 23076     |
| P70290    | 55 kDa erythrocyte membrane protein                               | 52227     |
| O54950    | 5'-AMP-activated protein kinase subunit gamma-1                   | 37520     |
| P47955    | 60S acidic ribosomal protein P1                                   | 11475     |
| P99027    | 60S acidic ribosomal protein P2                                   | 11651     |
| P67984    | 60S ribosomal protein L22                                         | 14759     |
| Q9D757    | 60S ribosomal protein L22-like 1                                  | 14467     |
| P62751    | 60S ribosomal protein L23a                                        | 17695     |
| P61255    | 60S ribosomal protein L26                                         | 17258     |
| P62900    | 60S ribosomal protein L31                                         | 14463     |
| Q6ZVV7    | 60S ribosomal protein L35                                         | 14553     |
| P61514    | 60S ribosomal protein L37a                                        | 10275     |
| Q9JJI8    | 60S ribosomal protein L38                                         | 8204      |

|        |                                                                       |        |
|--------|-----------------------------------------------------------------------|--------|
| P51410 | 60S ribosomal protein L9                                              | 21881  |
| Q9CQ60 | 6-phosphogluconolactonase                                             | 27254  |
| Q8CBW3 | Abl interactor 1                                                      | 52288  |
| P60710 | Actin cytoplasmic 1                                                   | 41737  |
| P63260 | Actin cytoplasmic 2                                                   | 41793  |
| Q9QZB7 | Actin-related protein 10                                              | 46208  |
| P61161 | Actin-related protein 2                                               | 44761  |
| Q9WV32 | Actin-related protein 2/3 complex subunit 1B                          | 41064  |
| Q9CVB6 | Actin-related protein 2/3 complex subunit 2                           | 34357  |
| P59999 | Actin-related protein 2/3 complex subunit 4                           | 19667  |
| Q9CPW4 | Actin-related protein 2/3 complex subunit 5                           | 16288  |
| Q99JY9 | Actin-related protein 3                                               | 47357  |
| Q8BK64 | Activator of 90 kDa heat shock protein ATPase homolog 1               | 38117  |
| P50247 | Adenosylhomocysteinase                                                | 47688  |
| P46664 | Adenylosuccinate synthetase isozyme 2                                 | 50021  |
| P61750 | ADP-ribosylation factor 4                                             | 20397  |
| P62331 | ADP-ribosylation factor 6                                             | 20082  |
| P61211 | ADP-ribosylation factor-like protein 1                                | 20412  |
| Q9D0J4 | ADP-ribosylation factor-like protein 2                                | 20864  |
| Q8BGQ7 | Alanine--tRNA ligase cytoplasmic                                      | 106908 |
| P28474 | Alcohol dehydrogenase class-3                                         | 39548  |
| Q571I9 | Aldehyde dehydrogenase family 16 member A1                            | 84756  |
| P45376 | Aldose reductase                                                      | 35732  |
| P45377 | Aldose reductase-related protein 2                                    | 36121  |
| P61164 | Alpha-centractin                                                      | 42614  |
| P27046 | Alpha-mannosidase 2                                                   | 131631 |
| Q9EPC1 | Alpha-parvin                                                          | 42330  |
| Q9DB05 | Alpha-soluble NSF attachment protein                                  | 33190  |
| P31230 | Aminoacyl tRNA synthase complex-interacting multifunctional protein 1 | 33997  |
| Q8R010 | Aminoacyl tRNA synthase complex-interacting multifunctional protein 2 | 35378  |
| P97449 | Aminopeptidase N                                                      | 109651 |
| P97384 | Annexin A11                                                           | 54079  |

|        |                                                               |        |
|--------|---------------------------------------------------------------|--------|
| P07356 | Annexin A2                                                    | 38676  |
| P97429 | Annexin A4                                                    | 35916  |
| P14824 | Annexin A6                                                    | 75885  |
| Q07076 | Annexin A7                                                    | 49925  |
| Q6P9J9 | Anoctamin-6                                                   | 106255 |
| P17426 | AP-2 complex subunit alpha-1                                  | 107664 |
| P17427 | AP-2 complex subunit alpha-2                                  | 104016 |
| P84091 | AP-2 complex subunit mu                                       | 49655  |
| Q9Z1T1 | AP-3 complex subunit beta-1                                   | 122740 |
| Q02013 | Aquaporin-1                                                   | 28793  |
| Q9WTY4 | Aquaporin-5                                                   | 28274  |
| Q9D0I9 | Arginine--tRNA ligase cytoplasmic                             | 75674  |
| Q61024 | Asparagine synthetase [glutamine-hydrolyzing]                 | 64283  |
| Q922B2 | Aspartate--tRNA ligase cytoplasmic                            | 57147  |
| Q9Z2W0 | Aspartyl aminopeptidase                                       | 52207  |
| P28658 | Ataxin-10                                                     | 53707  |
| Q9DC29 | ATP-binding cassette sub-family B member 6 mitochondrial      | 93770  |
| P61222 | ATP-binding cassette sub-family E member 1                    | 67314  |
| Q6P542 | ATP-binding cassette sub-family F member 1                    | 94945  |
| Q91V92 | ATP-citrate synthase                                          | 119728 |
| Q91VR5 | ATP-dependent RNA helicase DDX1                               | 82500  |
| Q88738 | Baculoviral IAP repeat-containing protein 6                   | 532176 |
| Q9JLV1 | BAG family molecular chaperone regulator 3                    | 61860  |
| O70318 | Band 4.1-like protein 2                                       | 109940 |
| Q9WV92 | Band 4.1-like protein 3                                       | 103338 |
| Q9CQC6 | Basic leucine zipper and W2 domain-containing protein 1       | 48043  |
| Q8BFZ3 | Beta-actin-like protein 2                                     | 42004  |
| Q8R5C5 | Beta-centractin                                               | 42281  |
| Q60967 | Bifunctional 3'-phosphoadenosine 5'-phosphosulfate synthase 1 | 70794  |
| Q9CWJ9 | Bifunctional purine biosynthesis protein PURH                 | 64217  |
| Q91XV3 | Brain acid soluble protein 1                                  | 22087  |
| Q8K2Q7 | BRO1 domain-containing protein BROX                           | 46202  |



|        |                                                               |        |
|--------|---------------------------------------------------------------|--------|
| Q06138 | Calcium-binding protein 39                                    | 39843  |
| O08529 | Calpain-2 catalytic subunit                                   | 79872  |
| Q9DAW9 | Calponin-3                                                    | 36429  |
| Q9DBC7 | cAMP-dependent protein kinase type I-alpha regulatory subunit | 43185  |
| P08074 | Carbonyl reductase [NADPH] 2                                  | 25958  |
| O89001 | Carboxypeptidase D                                            | 152405 |
| P26231 | Catenin alpha-1                                               | 100106 |
| Q61301 | Catenin alpha-2                                               | 105286 |
| Q02248 | Catenin beta-1                                                | 85471  |
| P10605 | Cathepsin B                                                   | 37280  |
| P24668 | Cation-dependent mannose-6-phosphate receptor                 | 31172  |
| O35566 | CD151 antigen                                                 | 28246  |
| Q8VE98 | CD276 antigen                                                 | 34002  |
| P15379 | CD44 antigen                                                  | 85617  |
| P41731 | CD63 antigen                                                  | 25767  |
| P40240 | CD9 antigen                                                   | 25258  |
| Q9Z0M6 | CD97 antigen                                                  | 90413  |
| Q8VCN6 | CD99 antigen                                                  | 16783  |
| P60766 | Cell division control protein 42 homolog                      | 21259  |
| Q08288 | Cell growth-regulating nucleolar protein                      | 43736  |
| Q5FWI3 | Cell surface hyaluronidase                                    | 153800 |
| Q9D8B3 | Charged multivesicular body protein 4b                        | 24936  |
| Q9D7S9 | Charged multivesicular body protein 5                         | 24576  |
| Q9Z1Q5 | Chloride intracellular channel protein 1                      | 27013  |
| Q6X893 | Choline transporter-like protein 1                            | 73067  |
| P23198 | Chromobox protein homolog 3                                   | 20855  |
| Q58A65 | C-Jun-amino-terminal kinase-interacting protein 4             | 146219 |
| Q68FD5 | Clathrin heavy chain 1                                        | 191555 |
| O08585 | Clathrin light chain A                                        | 25604  |
| O55029 | Coatamer subunit beta'                                        | 102449 |
| Q5XJY5 | Coatamer subunit delta                                        | 57230  |
| O89079 | Coatamer subunit epsilon                                      | 34567  |

|        |                                                         |        |
|--------|---------------------------------------------------------|--------|
| Q9QZE5 | Coatomer subunit gamma-1                                | 97513  |
| Q9JIG7 | Coiled-coil domain-containing protein 22                | 70844  |
| Q91W50 | Cold shock domain-containing protein E1                 | 88791  |
| P11087 | Collagen alpha-1(I) chain                               | 138033 |
| P08121 | Collagen alpha-1(III) chain                             | 138944 |
| Q01149 | Collagen alpha-2(I) chain                               | 129557 |
| Q64735 | Complement component receptor 1-like protein            | 53763  |
| Q8K2Z4 | Condensin complex subunit 1                             | 155664 |
| P61202 | COP9 signalosome complex subunit 2                      | 51597  |
| Q9CZ04 | COP9 signalosome complex subunit 7a                     | 30224  |
| Q8C166 | Copine-1                                                | 58887  |
| Q8BT60 | Copine-3                                                | 59585  |
| Q04447 | Creatine kinase B-type                                  | 42713  |
| P70698 | CTP synthase 1                                          | 66683  |
| Q9WTX6 | Cullin-1                                                | 89691  |
| Q9D1P4 | Cysteine and histidine-rich domain-containing protein 1 | 37351  |
| O88487 | Cytoplasmic dynein 1 intermediate chain 2               | 68394  |
| Q8R1Q8 | Cytoplasmic dynein 1 light intermediate chain 1         | 56614  |
| Q6PDLO | Cytoplasmic dynein 1 light intermediate chain 2         | 54219  |
| Q7TMB8 | Cytoplasmic FMR1-interacting protein 1                  | 145241 |
| Q9CPY7 | Cytosol aminopeptidase                                  | 56141  |
| Q91V12 | Cytosolic acyl coenzyme A thioester hydrolase           | 42537  |
| P47713 | Cytosolic phospholipase A2                              | 85222  |
| Q61753 | D-3-phosphoglycerate dehydrogenase                      | 56586  |
| O35215 | D-dopachrome decarboxylase                              | 13077  |
| Q8CJ26 | Death domain-containing membrane protein NRADD          | 24727  |
| Q8R1A4 | Dedicator of cytokinesis protein 7                      | 241436 |
| Q91YP3 | Deoxyribose-phosphate aldolase                          | 34975  |
| P31001 | Desmin                                                  | 53498  |
| P32233 | Developmentally-regulated GTP-binding protein 1         | 40512  |
| O08553 | Dihydropyrimidinase-related protein 2                   | 62278  |
| Q8BWT5 | Disco-interacting protein 2 homolog A                   | 165254 |

|        |                                                                          |        |
|--------|--------------------------------------------------------------------------|--------|
| Q61072 | Disintegrin and metalloproteinase domain-containing protein 9            | 92080  |
| Q811D0 | Disks large homolog 1                                                    | 100120 |
| P13864 | DNA (cytosine-5)-methyltransferase 1                                     | 183188 |
| P97310 | DNA replication licensing factor MCM2                                    | 102077 |
| Q01320 | DNA topoisomerase 2-alpha                                                | 172789 |
| P28352 | DNA-(apurinic or apyrimidinic site) lyase                                | 35490  |
| P60904 | DnaJ homolog subfamily C member 5                                        | 22101  |
| Q91YQ5 | Dolichyl-diphosphooligosaccharide--protein glycosyltransferase subunit 1 | 68528  |
| Q9Z108 | Double-stranded RNA-binding protein Staufen homolog 1                    | 53925  |
| Q62418 | Drebrin-like protein                                                     | 48700  |
| O08788 | Dynactin subunit 1                                                       | 141675 |
| Q99KJ8 | Dynactin subunit 2                                                       | 44117  |
| Q9Z0Y1 | Dynactin subunit 3                                                       | 20978  |
| Q8CBY8 | Dynactin subunit 4                                                       | 53057  |
| Q8K1M6 | Dynamamin-1-like protein                                                 | 82658  |
| P39054 | Dynamamin-2                                                              | 98145  |
| Q9ERU9 | E3 SUMO-protein ligase RanBP2                                            | 341122 |
| Q7TMY8 | E3 ubiquitin-protein ligase HUWE1                                        | 482640 |
| P46935 | E3 ubiquitin-protein ligase NEDD4                                        | 102706 |
| A2AN08 | E3 ubiquitin-protein ligase UBR4                                         | 572298 |
| P06802 | Ectonucleotide pyrophosphatase/phosphodiesterase family member 1         | 103176 |
| Q35474 | EGF-like repeat and discoidin I-like domain-containing protein 3         | 53712  |
| E9PVA8 | eIF-2-alpha kinase activator GCN1                                        | 293018 |
| P10126 | Elongation factor 1-alpha 1                                              | 50114  |
| P57776 | Elongation factor 1-delta                                                | 31293  |
| Q9D8N0 | Elongation factor 1-gamma                                                | 50061  |
| P58252 | Elongation factor 2                                                      | 95314  |
| Q62419 | Endophilin-A2                                                            | 41518  |
| Q9JK48 | Endophilin-B1                                                            | 40855  |
| Q4PZA2 | Endothelin-converting enzyme 1                                           | 87073  |
| P00924 | Enolase 1                                                                | 46816  |
| Q03145 | Ephrin type-A receptor 2                                                 | 108852 |

|        |                                                                   |        |
|--------|-------------------------------------------------------------------|--------|
| Q9JIM1 | Equilibrative nucleoside transporter 1                            | 50192  |
| Q80TH2 | Erbin                                                             | 157248 |
| P54116 | Erythrocyte band 7 integral membrane protein                      | 31375  |
| Q8R050 | Eukaryotic peptide chain release factor GTP-binding subunit ERF3A | 68626  |
| Q6ZWX6 | Eukaryotic translation initiation factor 2 subunit 1              | 36108  |
| Q99L45 | Eukaryotic translation initiation factor 2 subunit 2              | 38092  |
| Q9Z0N1 | Eukaryotic translation initiation factor 2 subunit 3 X-linked     | 51066  |
| Q8BJW6 | Eukaryotic translation initiation factor 2A                       | 64403  |
| P23116 | Eukaryotic translation initiation factor 3 subunit A              | 161936 |
| Q8JZQ9 | Eukaryotic translation initiation factor 3 subunit B              | 91370  |
| Q8R1B4 | Eukaryotic translation initiation factor 3 subunit C              | 105531 |
| P60229 | Eukaryotic translation initiation factor 3 subunit E              | 52221  |
| Q9DCH4 | Eukaryotic translation initiation factor 3 subunit F              | 37984  |
| Q9Z1D1 | Eukaryotic translation initiation factor 3 subunit G              | 35638  |
| Q91WK2 | Eukaryotic translation initiation factor 3 subunit H              | 39832  |
| Q9QZD9 | Eukaryotic translation initiation factor 3 subunit I              | 36461  |
| Q8QZY1 | Eukaryotic translation initiation factor 3 subunit L              | 66613  |
| Q99JX4 | Eukaryotic translation initiation factor 3 subunit M              | 42517  |
| Q6NZJ6 | Eukaryotic translation initiation factor 4 gamma 1                | 176076 |
| Q8BGD9 | Eukaryotic translation initiation factor 4B                       | 68840  |
| P63073 | Eukaryotic translation initiation factor 4E                       | 25053  |
| P59325 | Eukaryotic translation initiation factor 5                        | 48968  |
| Q05D44 | Eukaryotic translation initiation factor 5B                       | 137616 |
| O55135 | Eukaryotic translation initiation factor 6                        | 26511  |
| A6H5Z3 | Exocyst complex component 6B                                      | 94130  |
| Q6P5F9 | Exportin-1                                                        | 123093 |
| Q9ERK4 | Exportin-2                                                        | 110455 |
| Q3TZZ7 | Extended synaptotagmin-2                                          | 94139  |
| P47753 | F-actin-capping protein subunit alpha-1                           | 32940  |
| P47754 | F-actin-capping protein subunit alpha-2                           | 32967  |
| P47757 | F-actin-capping protein subunit beta                              | 31345  |
| Q3U0V1 | Far upstream element-binding protein 2                            | 76776  |

|        |                                                                  |        |
|--------|------------------------------------------------------------------|--------|
| P19096 | Fatty acid synthase                                              | 272426 |
| B2RXV4 | Feline leukemia virus subgroup C receptor-related protein 1      | 60469  |
| F8VPU2 | FERM ARHGEF and pleckstrin domain-containing protein 1           | 118875 |
| Q8CIB5 | Fermitin family homolog 2                                        | 77800  |
| P09528 | Ferritin heavy chain                                             | 21067  |
| P29391 | Ferritin light chain 1                                           | 20802  |
| Q8VHX6 | Filamin-C                                                        | 291117 |
| Q923D2 | Flavin reductase (NADPH)                                         | 22197  |
| O08917 | Flotillin-1                                                      | 47513  |
| Q6ZPF4 | Formin-like protein 3                                            | 117169 |
| Q9R059 | Four and a half LIM domains protein 3                            | 31795  |
| Q61584 | Fragile X mental retardation syndrome-related protein 1          | 76222  |
| P97807 | Fumarate hydratase mitochondrial                                 | 54357  |
| P16110 | Galectin-3                                                       | 27515  |
| Q8K0C9 | GDP-mannose 4 6 dehydratase                                      | 41985  |
| P13020 | Gelsolin                                                         | 85942  |
| Q00612 | Glucose-6-phosphate 1-dehydrogenase X                            | 59263  |
| O09172 | Glutamate--cysteine ligase regulatory subunit                    | 30535  |
| P47856 | Glutamine--fructose-6-phosphate aminotransferase [isomerizing] 1 | 78539  |
| Q8BML9 | Glutamine--tRNA ligase                                           | 87677  |
| P10649 | Glutathione S-transferase Mu 1                                   | 25970  |
| P19157 | Glutathione S-transferase P 1                                    | 23609  |
| P16858 | Glyceraldehyde-3-phosphate dehydrogenase                         | 35810  |
| Q9CZD3 | Glycine--tRNA ligase                                             | 81878  |
| Q9JHJ3 | Glycosylated lysosomal membrane protein                          | 43804  |
| O70310 | Glycylpeptide N-tetradecanoyltransferase 1                       | 56888  |
| Q9QZF2 | Glypican-1                                                       | 61360  |
| Q3THK7 | GMP synthase [glutamine-hydrolyzing]                             | 76724  |
| Q61543 | Golgi apparatus protein 1                                        | 133734 |
| Q99JX3 | Golgi reassembly-stacking protein 2                              | 47038  |
| Q8BMP6 | Golgi resident protein GCP60                                     | 60181  |
| Q9CYL5 | Golgi-associated plant pathogenesis-related protein 1            | 17090  |

|        |                                                                      |        |
|--------|----------------------------------------------------------------------|--------|
| P08556 | GTPase NRas                                                          | 21199  |
| O08582 | GTP-binding protein 1                                                | 72301  |
| P36536 | GTP-binding protein SAR1a                                            | 22371  |
| P08752 | Guanine nucleotide-binding protein G(i) subunit alpha-2              | 40489  |
| Q9DC51 | Guanine nucleotide-binding protein G(k) subunit alpha                | 40538  |
| P18872 | Guanine nucleotide-binding protein G(o) subunit alpha                | 40085  |
| P21279 | Guanine nucleotide-binding protein G(q) subunit alpha                | 42158  |
| P63094 | Guanine nucleotide-binding protein G(s) subunit alpha isoforms short | 45664  |
| P27601 | Guanine nucleotide-binding protein subunit alpha-13                  | 44055  |
| P29387 | Guanine nucleotide-binding protein subunit beta-4                    | 37379  |
| Q9WVD4 | H(+)/Cl(-) exchange transporter 5                                    | 83101  |
| P17879 | Heat shock 70 kDa protein 1B                                         | 70176  |
| P16627 | Heat shock 70 kDa protein 1-like                                     | 70637  |
| P63017 | Heat shock cognate 71 kDa protein                                    | 70871  |
| Q61699 | Heat shock protein 105 kDa                                           | 96407  |
| P14602 | Heat shock protein beta-1                                            | 23014  |
| Q99LI8 | Hepatocyte growth factor-regulated tyrosine kinase substrate         | 86015  |
| Q8BG05 | Heterogeneous nuclear ribonucleoprotein A3                           | 39652  |
| Q9Z2X1 | Heterogeneous nuclear ribonucleoprotein F                            | 45730  |
| P61979 | Heterogeneous nuclear ribonucleoprotein K                            | 50976  |
| Q9D0E1 | Heterogeneous nuclear ribonucleoprotein M                            | 77649  |
| Q7TMK9 | Heterogeneous nuclear ribonucleoprotein Q                            | 69633  |
| O88569 | Heterogeneous nuclear ribonucleoproteins A2/B1                       | 37403  |
| P62748 | Hippocalcin-like protein 1                                           | 22338  |
| P43275 | Histone H1.1                                                         | 21785  |
| P15864 | Histone H1.2                                                         | 21267  |
| Q60973 | Histone-binding protein RBBP7                                        | 47790  |
| Q8JZK9 | Hydroxymethylglutaryl-CoA synthase cytoplasmic                       | 57569  |
| P00493 | Hypoxanthine-guanine phosphoribosyltransferase                       | 24570  |
| Q6ZQA6 | Immunoglobulin superfamily member 3                                  | 134710 |
| P52293 | Importin subunit alpha-1                                             | 57928  |
| O35345 | Importin subunit alpha-7                                             | 59964  |

|        |                                                                 |        |
|--------|-----------------------------------------------------------------|--------|
| P70168 | Importin subunit beta-1                                         | 97184  |
| P24547 | Inosine-5'-monophosphate dehydrogenase 2                        | 55815  |
| Q80V26 | Inositol monophosphatase 3                                      | 38616  |
| P11688 | Integrin alpha-5                                                | 115043 |
| Q61739 | Integrin alpha-6                                                | 122159 |
| Q61738 | Integrin alpha-7                                                | 129329 |
| P09055 | Integrin beta-1                                                 | 88231  |
| Q99J93 | Interferon-induced transmembrane protein 2                      | 15743  |
| Q9CXY6 | Interleukin enhancer-binding factor 2                           | 43062  |
| Q0GNC1 | Inverted formin-2                                               | 138560 |
| Q9CX00 | IST1 homolog                                                    | 39468  |
| Q02257 | Junction plakoglobin                                            | 81801  |
| P02535 | Keratin type I cytoskeletal 10                                  | 57770  |
| Q9Z2K1 | Keratin type I cytoskeletal 16                                  | 51606  |
| Q6IFX2 | Keratin type I cytoskeletal 42                                  | 50133  |
| P04104 | Keratin type II cytoskeletal 1                                  | 65606  |
| Q3TTY5 | Keratin type II cytoskeletal 2 epidermal                        | 70923  |
| Q922U2 | Keratin type II cytoskeletal 5                                  | 61767  |
| Q80W68 | Kin of IRRE-like protein 1                                      | 87176  |
| Q88447 | Kinesin light chain 1                                           | 61450  |
| Q61768 | Kinesin-1 heavy chain                                           | 109551 |
| P21956 | Lactadherin                                                     | 51241  |
| P02469 | Laminin subunit beta-1                                          | 197089 |
| Q9Z1R2 | Large proline-rich protein BAG6                                 | 121037 |
| Q505F5 | Leucine-rich repeat-containing protein 47                       | 63590  |
| Q922Q8 | Leucine-rich repeat-containing protein 59                       | 34877  |
| P24527 | Leukotriene A-4 hydrolase                                       | 69051  |
| Q99JW4 | LIM and senescent cell antigen-like-containing domain protein 1 | 37240  |
| Q8BFW7 | Lipoma-preferred partner homolog                                | 65891  |
| Q9QUJ7 | Long-chain-fatty-acid--CoA ligase 4                             | 79077  |
| Q9D358 | Low molecular weight phosphotyrosine protein phosphatase        | 18192  |
| Q64253 | Lymphocyte antigen 6E                                           | 13800  |

|        |                                                         |        |
|--------|---------------------------------------------------------|--------|
| O35114 | Lysosome membrane protein 2                             | 54044  |
| P11438 | Lysosome-associated membrane glycoprotein 1             | 43865  |
| P14152 | Malate dehydrogenase cytoplasmic                        | 36511  |
| Q8CI59 | Metalloreductase STEAP3                                 | 54749  |
| O08663 | Methionine aminopeptidase 2                             | 52922  |
| P27546 | Microtubule-associated protein 4                        | 117429 |
| Q61166 | Microtubule-associated protein RP/EB family member 1    | 30016  |
| Q9CYG7 | Mitochondrial import receptor subunit TOM34             | 34278  |
| P63085 | Mitogen-activated protein kinase 1                      | 41276  |
| P97820 | Mitogen-activated protein kinase kinase kinase kinase 4 | 140602 |
| P10404 | MLV-related proviral Env polyprotein                    | 69613  |
| P06795 | Multidrug resistance protein 1B                         | 140993 |
| Q9DCL9 | Multifunctional protein ADE2                            | 47006  |
| Q8VCR8 | Myosin light chain kinase 2 skeletal/cardiac muscle     | 65990  |
| Q60605 | Myosin light polypeptide 6                              | 16930  |
| Q3THE2 | Myosin regulatory light chain 12B                       | 19779  |
| Q8VDD5 | Myosin-9                                                | 226370 |
| Q99LD8 | N(G) N(G)-dimethylarginine dimethylaminohydrolase 2     | 29646  |
| Q64669 | NAD(P)H dehydrogenase [quinone] 1                       | 30960  |
| Q80UM3 | N-alpha-acetyltransferase 15 NatA auxiliary subunit     | 100961 |
| P28660 | Nck-associated protein 1                                | 128784 |
| O35516 | Neurogenic locus notch homolog protein 2                | 265326 |
| P05480 | Neuronal proto-oncogene tyrosine-protein kinase Src     | 60645  |
| P97333 | Neuropilin-1                                            | 103000 |
| O35874 | Neutral amino acid transporter A                        | 56062  |
| P51912 | Neutral amino acid transporter B(0)                     | 58483  |
| P10493 | Nidogen-1                                               | 136538 |
| Q99K48 | Non-POU domain-containing octamer-binding protein       | 54541  |
| O35604 | NPC intracellular cholesterol transporter 1             | 142884 |
| Q9Z0J0 | NPC intracellular cholesterol transporter 2             | 16442  |
| Q9CZ44 | NSFL1 cofactor p47                                      | 40710  |
| Q99MD9 | Nuclear autoantigenic sperm protein                     | 83954  |



|        |                                                             |        |
|--------|-------------------------------------------------------------|--------|
| Q3UYV9 | Nuclear cap-binding protein subunit 1                       | 91927  |
| P62960 | Nuclease-sensitive element-binding protein 1                | 35730  |
| Q6DFW4 | Nucleolar protein 58                                        | 60343  |
| Q9JIK5 | Nucleolar RNA helicase 2                                    | 93551  |
| P09405 | Nucleolin                                                   | 76723  |
| Q61937 | Nucleophosmin                                               | 32560  |
| P28656 | Nucleosome assembly protein 1-like 1                        | 45345  |
| Q9CZ30 | Obg-like ATPase 1                                           | 44730  |
| Q3B7Z2 | Oxysterol-binding protein 1                                 | 88797  |
| Q9Z0P4 | Paralemmin-1                                                | 41614  |
| Q8CI51 | PDZ and LIM domain protein 5                                | 63299  |
| Q3TJD7 | PDZ and LIM domain protein 7                                | 50119  |
| Q8BFY6 | Peflin                                                      | 29228  |
| P30412 | Peptidyl-prolyl cis-trans isomerase C                       | 22794  |
| Q9DBG5 | Perilipin-3                                                 | 47262  |
| O70589 | Peripheral plasma membrane protein CASK                     | 105109 |
| P51660 | Peroxisomal multifunctional enzyme type 2                   | 79482  |
| Q8C0C7 | Phenylalanine--tRNA ligase alpha subunit                    | 57599  |
| Q9WUA2 | Phenylalanine--tRNA ligase beta subunit                     | 65697  |
| P70296 | Phosphatidylethanolamine-binding protein 1                  | 20830  |
| E9Q3L2 | Phosphatidylinositol 4-kinase alpha                         | 237040 |
| P09411 | Phosphoglycerate kinase 1                                   | 44550  |
| Q9D0M1 | Phosphoribosyl pyrophosphate synthase-associated protein 1  | 39432  |
| Q5SUR0 | Phosphoribosylformylglycinamide synthase                    | 144629 |
| P63005 | Platelet-activating factor acetylhydrolase IB subunit alpha | 46670  |
| P05622 | Platelet-derived growth factor receptor beta                | 122806 |
| Q9QXS1 | Plectin                                                     | 534193 |
| P70206 | Plexin-A1                                                   | 211098 |
| B2RXS4 | Plexin-B2                                                   | 206229 |
| P60335 | Poly(rC)-binding protein 1                                  | 37498  |
| Q61990 | Poly(rC)-binding protein 2                                  | 38222  |
| Q3UEB3 | Poly(U)-binding-splicing factor PUF60                       | 60249  |

|        |                                                       |        |
|--------|-------------------------------------------------------|--------|
| P29341 | Polyadenylate-binding protein 1                       | 70671  |
| P17225 | Polypyrimidine tract-binding protein 1                | 56478  |
| O70591 | Prefoldin subunit 2                                   | 16534  |
| Q99KP6 | Pre-mRNA-processing factor 19                         | 55239  |
| P49769 | Presenilin-1                                          | 52640  |
| Q922K7 | Probable 28S rRNA (cytosine-C(5))-methyltransferase   | 86752  |
| P54823 | Probable ATP-dependent RNA helicase DDX6              | 54192  |
| P70398 | Probable ubiquitin carboxyl-terminal hydrolase FAF-X  | 290709 |
| Q8K297 | Procollagen galactosyltransferase 1                   | 71061  |
| Q9JHZ2 | Progressive ankylosis protein                         | 54298  |
| P17918 | Proliferating cell nuclear antigen                    | 28785  |
| P50580 | Proliferation-associated protein 2G4                  | 43699  |
| Q91ZX7 | Prolow-density lipoprotein receptor-related protein 1 | 504745 |
| Q60715 | Prolyl 4-hydroxylase subunit alpha-1                  | 60910  |
| Q9QUR6 | Prolyl endopeptidase                                  | 80752  |
| Q61207 | Prosaposin                                            | 61422  |
| Q91YR9 | Prostaglandin reductase 1                             | 35560  |
| P61290 | Proteasome activator complex subunit 3                | 29506  |
| Q9R1P4 | Proteasome subunit alpha type-1                       | 29547  |
| O70435 | Proteasome subunit alpha type-3                       | 28405  |
| Q9R1P0 | Proteasome subunit alpha type-4                       | 29471  |
| Q9Z2U1 | Proteasome subunit alpha type-5                       | 26411  |
| Q9QUM9 | Proteasome subunit alpha type-6                       | 27372  |
| Q9Z2U0 | Proteasome subunit alpha type-7                       | 27855  |
| O09061 | Proteasome subunit beta type-1                        | 26372  |
| Q9R1P3 | Proteasome subunit beta type-2                        | 22906  |
| Q9R1P1 | Proteasome subunit beta type-3                        | 22965  |
| P99026 | Proteasome subunit beta type-4                        | 29116  |
| Q60692 | Proteasome subunit beta type-6                        | 25379  |
| P70195 | Proteasome subunit beta type-7                        | 29891  |
| Q9JIF0 | Protein arginine N-methyltransferase 1                | 42436  |
| Q8CIG8 | Protein arginine N-methyltransferase 5                | 72680  |

|        |                                                                   |        |
|--------|-------------------------------------------------------------------|--------|
| Q8BXZ1 | Protein disulfide-isomerase TMX3                                  | 51848  |
| Q8C0Z1 | Protein FAM234A                                                   | 60576  |
| Q9JJ28 | Protein flightless-1 homolog                                      | 144803 |
| Q99JB8 | Protein kinase C and casein kinase II substrate protein 3         | 48585  |
| Q9WVE8 | Protein kinase C and casein kinase substrate in neurons protein 2 | 55833  |
| Q3UM45 | Protein phosphatase 1 regulatory subunit 7                        | 41292  |
| Q8BK67 | Protein RCC2                                                      | 55983  |
| P08207 | Protein S100-A10                                                  | 11186  |
| P07091 | Protein S100-A4                                                   | 11721  |
| Q80U72 | Protein scribble homolog                                          | 174058 |
| Q01405 | Protein transport protein Sec23A                                  | 86162  |
| Q3UPL0 | Protein transport protein Sec31A                                  | 133569 |
| Q80WQ2 | Protein VAC14 homolog                                             | 88048  |
| P23492 | Purine nucleoside phosphorylase                                   | 32277  |
| P23249 | Putative helicase MOV-10                                          | 113583 |
| Q810B6 | Rabankyrin-5                                                      | 128652 |
| Q9CQ22 | Ragulator complex protein LAMTOR1                                 | 17749  |
| P34022 | Ran-specific GTPase-activating protein                            | 23596  |
| Q01730 | Ras suppressor protein 1                                          | 31550  |
| P63001 | Ras-related C3 botulinum toxin substrate 1                        | 21450  |
| Q99K70 | Ras-related GTP-binding protein C                                 | 44121  |
| P61027 | Ras-related protein Rab-10                                        | 22541  |
| Q91V41 | Ras-related protein Rab-14                                        | 23897  |
| P35293 | Ras-related protein Rab-18                                        | 23035  |
| P62821 | Ras-related protein Rab-1A                                        | 22678  |
| Q9D1G1 | Ras-related protein Rab-1B                                        | 22187  |
| P35282 | Ras-related protein Rab-21                                        | 24106  |
| Q6PHN9 | Ras-related protein Rab-35                                        | 23025  |
| Q9CQD1 | Ras-related protein Rab-5A                                        | 23599  |
| P35278 | Ras-related protein Rab-5C                                        | 23412  |
| P35279 | Ras-related protein Rab-6A                                        | 23590  |
| P51150 | Ras-related protein Rab-7a                                        | 23490  |

|        |                                                                                   |        |
|--------|-----------------------------------------------------------------------------------|--------|
| Q9JIW9 | Ras-related protein Ral-B                                                         | 23349  |
| P62835 | Ras-related protein Rap-1A                                                        | 20987  |
| Q99JI6 | Ras-related protein Rap-1b                                                        | 20825  |
| P10833 | Ras-related protein R-Ras                                                         | 23764  |
| P62071 | Ras-related protein R-Ras2                                                        | 23400  |
| Q8K2J7 | RELT-like protein 1                                                               | 29351  |
| Q8BHL4 | Retinoic acid-induced protein 3                                                   | 40101  |
| Q60875 | Rho guanine nucleotide exchange factor 2                                          | 111974 |
| P70336 | Rho-associated protein kinase 2                                                   | 160585 |
| P62746 | Rho-related GTP-binding protein RhoB                                              | 22123  |
| Q62159 | Rho-related GTP-binding protein RhoC                                              | 22006  |
| P84096 | Rho-related GTP-binding protein RhoG                                              | 21308  |
| Q9D7G0 | Ribose-phosphate pyrophosphokinase 1                                              | 34834  |
| Q99PL5 | Ribosome-binding protein 1                                                        | 172878 |
| Q8VH51 | RNA-binding protein 39                                                            | 59407  |
| O35609 | Secretory carrier-associated membrane protein 3                                   | 38458  |
| Q64105 | Sepiapterin reductase                                                             | 27883  |
| O55131 | Septin-7                                                                          | 50550  |
| Q64337 | Sequestosome-1                                                                    | 48163  |
| Q6PDM2 | Serine/arginine-rich splicing factor 1                                            | 27745  |
| P84104 | Serine/arginine-rich splicing factor 3                                            | 19330  |
| Q8BL97 | Serine/arginine-rich splicing factor 7                                            | 30818  |
| Q8CIN4 | Serine/threonine-protein kinase PAK 2                                             | 57930  |
| Q6P1F6 | Serine/threonine-protein phosphatase 2A 55 kDa regulatory subunit B alpha isoform | 51692  |
| Q76MZ3 | Serine/threonine-protein phosphatase 2A 65 kDa regulatory subunit A alpha isoform | 65323  |
| P63330 | Serine/threonine-protein phosphatase 2A catalytic subunit alpha isoform           | 35608  |
| P26638 | Serine--tRNA ligase cytoplasmic                                                   | 58389  |
| Q99J77 | Sialic acid synthase                                                              | 40024  |
| Q8BMA6 | Signal recognition particle subunit SRP68                                         | 70574  |
| P70297 | Signal transducing adapter molecule 1                                             | 59771  |
| Q91Z67 | SLIT-ROBO Rho GTPase-activating protein 2                                         | 120798 |
| P62317 | Small nuclear ribonucleoprotein Sm D2                                             | 13527  |

|        |                                                     |        |
|--------|-----------------------------------------------------|--------|
| P62320 | Small nuclear ribonucleoprotein Sm D3               | 13916  |
| Q9CQ65 | S-methyl-5'-thioadenosine phosphorylase             | 31062  |
| O35316 | Sodium- and chloride-dependent taurine transporter  | 69856  |
| Q8BTY2 | Sodium bicarbonate cotransporter 3                  | 116514 |
| Q9JIS8 | Solute carrier family 12 member 4                   | 120624 |
| Q9WVL3 | Solute carrier family 12 member 7                   | 119481 |
| Q6P069 | Sorcin                                              | 21627  |
| Q9WV80 | Sorting nexin-1                                     | 58952  |
| Q91ZR2 | Sorting nexin-18                                    | 67904  |
| Q6P8X1 | Sorting nexin-6                                     | 46649  |
| Q91VH2 | Sorting nexin-9                                     | 66546  |
| Q64674 | Spermidine synthase                                 | 33995  |
| Q9WTX5 | S-phase kinase-associated protein 1                 | 18672  |
| Q8VIJ6 | Splicing factor proline- and glutamine-rich         | 75442  |
| Q9D554 | Splicing factor 3A subunit 3                        | 58842  |
| Q78PY7 | Staphylococcal nuclease domain-containing protein 1 | 102088 |
| O54988 | STE20-like serine/threonine-protein kinase          | 141457 |
| Q9WUD1 | STIP1 homology and U box-containing protein 1       | 34909  |
| Q9R1T2 | SUMO-activating enzyme subunit 1                    | 38620  |
| Q9Z1F9 | SUMO-activating enzyme subunit 2                    | 70569  |
| P35922 | Synaptic functional regulator FMR1                  | 68989  |
| O09044 | Synaptosomal-associated protein 23                  | 23261  |
| Q9ER00 | Syntaxin-12                                         | 31195  |
| P70452 | Syntaxin-4                                          | 34165  |
| O88983 | Syntaxin-8                                          | 26925  |
| O08599 | Syntaxin-binding protein 1                          | 67569  |
| Q60770 | Syntaxin-binding protein 3                          | 67943  |
| P26039 | Talin-1                                             | 269819 |
| Q71LX4 | Talin-2                                             | 253618 |
| P47226 | Testin                                              | 47983  |
| O70401 | Tetraspanin-6                                       | 27333  |
| Q8CDN6 | Thioredoxin-like protein 1                          | 32237  |

|        |                                                         |        |
|--------|---------------------------------------------------------|--------|
| Q9D0R2 | Threonine--tRNA ligase cytoplasmic                      | 83356  |
| Q00609 | T-lymphocyte activation antigen CD80                    | 34590  |
| Q93092 | Transaldolase                                           | 37387  |
| Q62318 | Transcription intermediary factor 1-beta                | 88847  |
| P42669 | Transcriptional activator protein Pur-alpha             | 34884  |
| Q35295 | Transcriptional activator protein Pur-beta              | 33901  |
| Q9QUI0 | Transforming protein RhoA                               | 21782  |
| Q01853 | Transitional endoplasmic reticulum ATPase               | 89322  |
| P40142 | Transketolase                                           | 67631  |
| P58021 | Transmembrane 9 superfamily member 2                    | 75330  |
| Q9ET30 | Transmembrane 9 superfamily member 3                    | 67545  |
| Q80X71 | Transmembrane protein 106B                              | 31172  |
| Q8BFY9 | Transportin-1                                           | 102357 |
| Q64737 | Trifunctional purine biosynthetic protein adenosine-3   | 107503 |
| P68369 | Tubulin alpha-1A chain                                  | 50136  |
| Q922F4 | Tubulin beta-6 chain                                    | 50090  |
| P83887 | Tubulin gamma-1 chain                                   | 51101  |
| Q8BYA0 | Tubulin-specific chaperone D                            | 133321 |
| Q6PB44 | Tyrosine-protein phosphatase non-receptor type 23       | 185215 |
| Q62376 | U1 small nuclear ribonucleoprotein 70 kDa               | 51992  |
| Q62189 | U1 small nuclear ribonucleoprotein A                    | 31835  |
| Q9JMA1 | Ubiquitin carboxyl-terminal hydrolase 14                | 56002  |
| Q7TQI3 | Ubiquitin thioesterase OTUB1                            | 31270  |
| P62838 | Ubiquitin-conjugating enzyme E2 D2                      | 16735  |
| P61079 | Ubiquitin-conjugating enzyme E2 D3                      | 16687  |
| P61089 | Ubiquitin-conjugating enzyme E2 N                       | 17138  |
| Q9CZY3 | Ubiquitin-conjugating enzyme E2 variant 1               | 16355  |
| Q02053 | Ubiquitin-like modifier-activating enzyme 1             | 117809 |
| Q8C7R4 | Ubiquitin-like modifier-activating enzyme 6             | 117966 |
| O70475 | UDP-glucose 6-dehydrogenase                             | 54832  |
| Q3TW96 | UDP-N-acetylhexosamine pyrophosphorylase-like protein 1 | 56614  |
| Q9DBP5 | UMP-CMP kinase                                          | 22165  |

|        |                                                                |        |
|--------|----------------------------------------------------------------|--------|
| Q9WTI7 | Unconventional myosin-Ic                                       | 121944 |
| Q9JK81 | UPF0160 protein MYG1 mitochondrial                             | 42723  |
| P13439 | Uridine 5'-monophosphate synthase                              | 52292  |
| P35456 | Urokinase plasminogen activator surface receptor               | 35428  |
| P40336 | Vacuolar protein sorting-associated protein 26A                | 38114  |
| Q9EQH3 | Vacuolar protein sorting-associated protein 35                 | 91713  |
| Q9CR26 | Vacuolar protein sorting-associated protein VTA1 homolog       | 33913  |
| P70460 | Vasodilator-stimulated phosphoprotein                          | 39667  |
| O88384 | Vesicle transport through interaction with t-SNAREs homolog 1B | 26713  |
| Q8VDJ3 | Vigilin                                                        | 141742 |
| P20152 | Vimentin                                                       | 53688  |
| O08532 | Voltage-dependent calcium channel subunit alpha-2/delta-1      | 124630 |
| P50516 | V-type proton ATPase catalytic subunit A                       | 68326  |
| P62814 | V-type proton ATPase subunit B brain isoform                   | 56551  |
| P57746 | V-type proton ATPase subunit D                                 | 28369  |
| P51863 | V-type proton ATPase subunit d 1                               | 40301  |
| P50518 | V-type proton ATPase subunit E 1                               | 26157  |
| Q8BVE3 | V-type proton ATPase subunit H                                 | 55855  |
| Q6PGL7 | WASH complex subunit 2                                         | 145310 |
| Q3UMB9 | WASH complex subunit 4                                         | 136370 |
| Q8C2E7 | WASH complex subunit 5                                         | 134110 |
| Q9ERF3 | WD repeat-containing protein 61                                | 33773  |
| Q8BH43 | Wiskott-Aldrich syndrome protein family member 2               | 54074  |
| Q6P1B1 | Xaa-Pro aminopeptidase 1                                       | 69591  |
| Q9JKB3 | Y-box-binding protein 3                                        | 38814  |
| Q7TMA2 | Zinc finger protein 503                                        | 63036  |

**Table S3.** Proteins exclusively present in Large Evs. For protein Acc. No, description, -10lgP, sequence coverage, the number of identified peptides and the number of unique peptides are reported.

| Accession | Description                                                   | Avg. Mass | -10lgP | Coverage (%) | Peptides | Unique peptides |
|-----------|---------------------------------------------------------------|-----------|--------|--------------|----------|-----------------|
| P58871    | 182 kDa tankyrase-1-binding protein                           | 181824    | 124.47 | 3            | 3        | 3               |
| P16330    | 2' 3'-cyclic-nucleotide 3'-phosphodiesterase                  | 47123     | 81.32  | 10           | 2        | 2               |
| Q3UHX2    | 28 kDa heat- and acid-stable phosphoprotein                   | 20605     | 99.21  | 10           | 2        | 2               |
| Q80VJ3    | 2'-deoxynucleoside 5'-phosphate N-hydrolase 1                 | 18977     | 53.37  | 18           | 2        | 2               |
| Q60597    | 2-oxoglutarate dehydrogenase mitochondrial                    | 116449    | 90.99  | 7            | 5        | 5               |
| Q99N96    | 39S ribosomal protein L1 mitochondrial                        | 37597     | 38.78  | 9            | 2        | 2               |
| Q9DB15    | 39S ribosomal protein L12 mitochondrial                       | 21708     | 108.95 | 31           | 5        | 5               |
| P70245    | 3-beta-hydroxysteroid-Delta(8) Delta(7)-isomerase             | 26215     | 97.23  | 10           | 2        | 2               |
| Q8BWT1    | 3-ketoacyl-CoA thiolase mitochondrial                         | 41830     | 146    | 16           | 4        | 4               |
| P53026    | 60S ribosomal protein L10a                                    | 24916     | 157.58 | 31           | 7        | 7               |
| Q8BU33    | Acetolactate synthase-like protein                            | 68156     | 141.14 | 10           | 3        | 3               |
| Q8QZT1    | Acetyl-CoA acetyltransferase mitochondrial                    | 44816     | 147.75 | 31           | 7        | 7               |
| Q99J27    | Acetyl-coenzyme A transporter 1                               | 61075     | 78.43  | 7            | 2        | 2               |
| Q9WV54    | Acid ceramidase                                               | 44670     | 61.96  | 8            | 3        | 3               |
| O35381    | Acidic leucine-rich nuclear phosphoprotein 32 family member A | 28538     | 133.3  | 23           | 3        | 3               |
| Q9EST5    | Acidic leucine-rich nuclear phosphoprotein 32 family member B | 31079     | 68.01  | 11           | 2        | 2               |
| P97822    | Acidic leucine-rich nuclear phosphoprotein 32 family member E | 29622     | 123.95 | 19           | 3        | 3               |
| Q8JZN5    | Acyl-CoA dehydrogenase family member 9 mitochondrial          | 68722     | 69.45  | 8            | 2        | 2               |
| Q9R0X4    | Acyl-coenzyme A thioesterase 9 mitochondrial                  | 50561     | 149.69 | 17           | 6        | 6               |
| P97823    | Acyl-protein thioesterase 1                                   | 24688     | 106.76 | 21           | 3        | 3               |
| Q64010    | Adapter molecule crk                                          | 33815     | 88.6   | 16           | 3        | 3               |
| Q9WTP6    | Adenylate kinase 2 mitochondrial                              | 26469     | 172.92 | 31           | 6        | 5               |
| Q9R0Y5    | Adenylate kinase isoenzyme 1                                  | 21540     | 69.37  | 13           | 2        | 2               |
| P54822    | Adenylosuccinate lyase                                        | 54866     | 167.01 | 35           | 10       | 10              |
| P48962    | ADP/ATP translocase 1                                         | 32904     | 250.79 | 57           | 17       | 7               |
| P51881    | ADP/ATP translocase 2                                         | 32931     | 244.85 | 48           | 16       | 6               |
| Q8VDL4    | ADP-dependent glucokinase                                     | 53903     | 132.32 | 19           | 6        | 6               |
| Q9JKX6    | ADP-sugar pyrophosphatase                                     | 23984     | 50.25  | 13           | 2        | 2               |



|        |                                                     |        |        |    |    |    |
|--------|-----------------------------------------------------|--------|--------|----|----|----|
| O08915 | AH receptor-interacting protein                     | 37605  | 38.81  | 9  | 2  | 2  |
| P47738 | Aldehyde dehydrogenase mitochondrial                | 56538  | 194.65 | 31 | 11 | 10 |
| Q9JII6 | Aldo-keto reductase family 1 member A1              | 36587  | 156.34 | 24 | 6  | 6  |
| Q8C0I1 | Alkyldihydroxyacetonephosphate synthase peroxisomal | 71684  | 88.53  | 5  | 2  | 2  |
| P55302 | Alpha-2-macroglobulin receptor-associated protein   | 42215  | 123.91 | 13 | 4  | 4  |
| Q9QYC0 | Alpha-adducin                                       | 80647  | 81.58  | 4  | 2  | 2  |
| Q6PAM1 | Alpha-taxilin                                       | 62369  | 85.58  | 6  | 2  | 2  |
| Q9JJW6 | Aly/REF export factor 2                             | 23730  | 96.8   | 17 | 2  | 2  |
| Q64133 | Amine oxidase [flavin-containing] A                 | 59602  | 129.81 | 24 | 8  | 8  |
| P12023 | Amyloid-beta A4 protein                             | 86722  | 47.05  | 3  | 2  | 2  |
| Q8WTY4 | Anamorsin                                           | 33429  | 78.78  | 18 | 3  | 3  |
| Q9EP71 | Ankycorbin                                          | 108852 | 47.78  | 4  | 2  | 2  |
| Q8BH79 | Anoctamin-10                                        | 76188  | 42.96  | 5  | 2  | 2  |
| O35643 | AP-1 complex subunit beta-1                         | 103935 | 226.48 | 24 | 14 | 7  |
| P22892 | AP-1 complex subunit gamma-1                        | 91350  | 83.52  | 4  | 3  | 3  |
| P35585 | AP-1 complex subunit mu-1                           | 48543  | 89.84  | 9  | 2  | 2  |
| P62743 | AP-2 complex subunit sigma                          | 17018  | 64.87  | 20 | 3  | 3  |
| O54774 | AP-3 complex subunit delta-1                        | 135081 | 170.91 | 10 | 7  | 7  |
| O35841 | Apoptosis inhibitor 5                               | 56785  | 183.29 | 20 | 5  | 5  |
| Q8K2K6 | Arf-GAP domain and FG repeat-containing protein 1   | 58043  | 39.43  | 5  | 2  | 2  |
| Q91YI0 | Argininosuccinate lyase                             | 51739  | 115.37 | 16 | 3  | 3  |
| P05201 | Aspartate aminotransferase cytoplasmic              | 46248  | 233.36 | 40 | 13 | 13 |
| P05202 | Aspartate aminotransferase mitochondrial            | 47411  | 226.41 | 43 | 14 | 14 |
| Q8BSY0 | Aspartyl/asparaginyl beta-hydroxylase               | 83042  | 68.42  | 7  | 3  | 3  |
| Q62048 | Astrocytic phosphoprotein PEA-15                    | 15054  | 69.37  | 30 | 3  | 3  |
| Q80Z10 | Astrotactin-2                                       | 149390 | 35.17  | 3  | 2  | 2  |
| Q6PA06 | Atlastin-2                                          | 66224  | 56.71  | 6  | 2  | 2  |
| Q91YH5 | Atlastin-3                                          | 60575  | 180.96 | 30 | 10 | 10 |
| Q9CQQ7 | ATP synthase F(0) complex subunit B1 mitochondrial  | 28949  | 78.39  | 23 | 4  | 4  |
| Q03265 | ATP synthase subunit alpha mitochondrial            | 59753  | 315.35 | 49 | 23 | 23 |
| Q9DCX2 | ATP synthase subunit d mitochondrial                | 18749  | 153.7  | 48 | 5  | 5  |
| Q9D3D9 | ATP synthase subunit delta mitochondrial            | 17600  | 137.39 | 29 | 3  | 3  |

|        |                                                                |        |        |    |    |    |
|--------|----------------------------------------------------------------|--------|--------|----|----|----|
| Q91VR2 | ATP synthase subunit gamma mitochondrial                       | 32886  | 142.36 | 35 | 7  | 7  |
| Q9DB20 | ATP synthase subunit O mitochondrial                           | 23364  | 149.02 | 32 | 5  | 5  |
| P97450 | ATP synthase-coupling factor 6 mitochondrial                   | 12496  | 62.62  | 34 | 2  | 2  |
| O54984 | ATPase Asna1                                                   | 38823  | 72.65  | 9  | 3  | 3  |
| Q9Z2H5 | Band 4.1-like protein 1                                        | 98315  | 98.85  | 10 | 6  | 4  |
| Q61334 | B-cell receptor-associated protein 29                          | 27964  | 54.17  | 10 | 2  | 2  |
| P15535 | Beta-1 4-galactosyltransferase 1                               | 44411  | 47.75  | 6  | 2  | 2  |
| Q8BTJ4 | Bis(5'-adenosyl)-triphosphatase enpp4                          | 51611  | 71.29  | 5  | 2  | 2  |
| Q8R016 | Bleomycin hydrolase                                            | 52511  | 106.77 | 20 | 5  | 5  |
| Q8BKX1 | Brain-specific angiogenesis inhibitor 1-associated protein 2   | 59237  | 134.23 | 14 | 6  | 6  |
| P24288 | Branched-chain-amino-acid aminotransferase cytosolic           | 42791  | 131.06 | 16 | 5  | 5  |
| Q8VC57 | BTB/POZ domain-containing protein KCTD5                        | 26164  | 89.58  | 16 | 2  | 2  |
| Q80W54 | CAAX prenyl protease 1 homolog                                 | 54735  | 115.93 | 21 | 6  | 6  |
| Q9WTR5 | Cadherin-13                                                    | 78186  | 103.15 | 12 | 4  | 4  |
| P61022 | Calcineurin B homologous protein 1                             | 22432  | 90.46  | 23 | 4  | 4  |
| Q921L3 | Calcium load-activated calcium channel                         | 21175  | 102.54 | 12 | 2  | 2  |
| Q8BH59 | Calcium-binding mitochondrial carrier protein Aralar1          | 74570  | 158.32 | 14 | 5  | 5  |
| Q8BMD8 | Calcium-binding mitochondrial carrier protein SCaMC-1          | 52902  | 130.18 | 11 | 3  | 3  |
| O35350 | Calpain-1 catalytic subunit                                    | 82106  | 96.33  | 11 | 5  | 5  |
| P51125 | Calpastatin                                                    | 84922  | 226.88 | 31 | 12 | 12 |
| O35887 | Calumenin                                                      | 37064  | 238.51 | 56 | 12 | 12 |
| P12367 | cAMP-dependent protein kinase type II-alpha regulatory subunit | 45389  | 89.38  | 12 | 3  | 2  |
| P31324 | cAMP-dependent protein kinase type II-beta regulatory subunit  | 46167  | 93.18  | 17 | 5  | 4  |
| Q60865 | Caprin-1                                                       | 78169  | 180.17 | 19 | 8  | 8  |
| Q8K354 | Carbonyl reductase [NADPH] 3                                   | 30953  | 115.47 | 24 | 4  | 4  |
| Q60737 | Casein kinase II subunit alpha                                 | 45134  | 84.48  | 11 | 3  | 3  |
| P67871 | Casein kinase II subunit beta                                  | 24942  | 84.08  | 19 | 3  | 3  |
| P70677 | Caspase-3                                                      | 31475  | 79.08  | 18 | 3  | 3  |
| P24270 | Catalase                                                       | 59795  | 188.23 | 23 | 8  | 8  |
| O88587 | Catechol O-methyltransferase                                   | 29486  | 155.12 | 30 | 4  | 4  |
| P06797 | Cathepsin L1                                                   | 37547  | 77.63  | 10 | 2  | 2  |
| Q07113 | Cation-independent mannose-6-phosphate receptor                | 273814 | 101.04 | 2  | 3  | 3  |

|        |                                                                     |        |        |    |    |    |
|--------|---------------------------------------------------------------------|--------|--------|----|----|----|
| Q63918 | Caveolae-associated protein 2                                       | 46764  | 103.08 | 7  | 2  | 2  |
| Q91VJ2 | Caveolae-associated protein 3                                       | 27853  | 59.97  | 17 | 2  | 2  |
| Q8CJ53 | Cdc42-interacting protein 4                                         | 68489  | 99.49  | 12 | 4  | 4  |
| Q9CQB5 | CDGSH iron-sulfur domain-containing protein 2                       | 15242  | 89.72  | 21 | 2  | 2  |
| Q9D9K3 | Cell death regulator Aven                                           | 37196  | 47.91  | 9  | 2  | 2  |
| P53996 | Cellular nucleic acid-binding protein                               | 19592  | 94.28  | 17 | 2  | 2  |
| Q924Z4 | Ceramide synthase 2                                                 | 45024  | 105.92 | 11 | 3  | 3  |
| Q9CQX5 | Claudin domain-containing protein 1                                 | 28572  | 73.7   | 15 | 3  | 3  |
| Q9CQF3 | Cleavage and polyadenylation specificity factor subunit 5           | 26240  | 130.39 | 27 | 3  | 3  |
| Q8VBZ3 | Cleft lip and palate transmembrane protein 1 homolog                | 75291  | 163.94 | 20 | 6  | 6  |
| Q80TV8 | CLIP-associating protein 1                                          | 169227 | 94.07  | 5  | 5  | 5  |
| Q9JIF7 | Coatomer subunit beta                                               | 107066 | 225.66 | 23 | 14 | 14 |
| Q9QXK3 | Coatomer subunit gamma-2                                            | 97680  | 151.11 | 7  | 5  | 2  |
| P61924 | Coatomer subunit zeta-1                                             | 20198  | 104.36 | 41 | 4  | 4  |
| Q8BRN9 | Coiled-coil and C2 domain-containing protein 1B                     | 93091  | 59.43  | 5  | 2  | 2  |
| Q9D024 | Coiled-coil domain-containing protein 47                            | 55844  | 153.28 | 16 | 5  | 5  |
| Q61245 | Collagen alpha-1(XI) chain                                          | 181031 | 39.47  | 2  | 2  | 2  |
| Q99MQ5 | Collagen alpha-1(XXV) chain                                         | 65377  | 34.5   | 4  | 2  | 2  |
| O35658 | Complement component 1 Q subcomponent-binding protein mitochondrial | 31013  | 169.76 | 54 | 7  | 7  |
| Q99LD4 | COP9 signalosome complex subunit 1                                  | 53442  | 69.87  | 9  | 2  | 2  |
| O35864 | COP9 signalosome complex subunit 5                                  | 37549  | 76.6   | 20 | 5  | 5  |
| O08997 | Copper transport protein ATOX1                                      | 7338   | 60.68  | 38 | 2  | 2  |
| Q4KML4 | Costars family protein ABRACL                                       | 9030   | 88.4   | 46 | 2  | 2  |
| Q9JLV5 | Cullin-3                                                            | 88948  | 128.9  | 10 | 5  | 5  |
| A2A432 | Cullin-4B                                                           | 110699 | 77.37  | 6  | 3  | 2  |
| Q9CYA0 | Cysteine-rich with EGF-like domain protein 2                        | 38220  | 58.57  | 8  | 2  | 2  |
| Q9ER72 | Cysteine--tRNA ligase cytoplasmic                                   | 94860  | 184.38 | 17 | 11 | 11 |
| P56395 | Cytochrome b5                                                       | 15241  | 82.44  | 25 | 2  | 2  |
| Q9CQX2 | Cytochrome b5 type B                                                | 16318  | 145.59 | 42 | 3  | 3  |
| Q9CZ13 | Cytochrome b-c1 complex subunit 1 mitochondrial                     | 52852  | 223.7  | 33 | 10 | 10 |
| Q9DB77 | Cytochrome b-c1 complex subunit 2 mitochondrial                     | 48235  | 206.64 | 32 | 9  | 9  |
| P99028 | Cytochrome b-c1 complex subunit 6 mitochondrial                     | 10435  | 97.21  | 52 | 3  | 3  |

|        |                                                                                                         |        |        |    |    |    |
|--------|---------------------------------------------------------------------------------------------------------|--------|--------|----|----|----|
| Q9D855 | Cytochrome b-c1 complex subunit 7                                                                       | 13527  | 88.18  | 22 | 2  | 2  |
| Q8R1I1 | Cytochrome b-c1 complex subunit 9                                                                       | 7446   | 58.69  | 38 | 2  | 2  |
| P62897 | Cytochrome c somatic                                                                                    | 11605  | 89.49  | 39 | 4  | 4  |
| P19783 | Cytochrome c oxidase subunit 4 isoform 1 mitochondrial                                                  | 19530  | 58.31  | 18 | 2  | 2  |
| P12787 | Cytochrome c oxidase subunit 5A mitochondrial                                                           | 16101  | 78.13  | 38 | 4  | 4  |
| P19536 | Cytochrome c oxidase subunit 5B mitochondrial                                                           | 13813  | 83.08  | 23 | 2  | 2  |
| P56391 | Cytochrome c oxidase subunit 6B1                                                                        | 10071  | 62.1   | 29 | 2  | 2  |
| Q9D0M3 | Cytochrome c1 heme protein mitochondrial                                                                | 35328  | 95.01  | 18 | 4  | 3  |
| Q8BKE6 | Cytochrome P450 20A1                                                                                    | 52149  | 119.78 | 17 | 5  | 5  |
| O88485 | Cytoplasmic dynein 1 intermediate chain 1                                                               | 70725  | 127.37 | 12 | 4  | 3  |
| Q8BMK4 | Cytoskeleton-associated protein 4                                                                       | 63692  | 278.87 | 48 | 20 | 20 |
| A2AGT5 | Cytoskeleton-associated protein 5                                                                       | 225633 | 123.69 | 3  | 4  | 4  |
| Q80WW9 | DDRKG domain-containing protein 1                                                                       | 35977  | 93.34  | 21 | 3  | 3  |
| Q99L04 | Dehydrogenase/reductase SDR family member 1                                                             | 34005  | 96.17  | 21 | 4  | 4  |
| Q99J47 | Dehydrogenase/reductase SDR family member 7B                                                            | 34987  | 68.44  | 12 | 3  | 3  |
| Q3U9G9 | Delta(14)-sterol reductase                                                                              | 71440  | 120.89 | 7  | 3  | 3  |
| Q9Z110 | Delta-1-pyrroline-5-carboxylate synthase                                                                | 87266  | 50.55  | 4  | 2  | 2  |
| P82347 | Delta-sarcoglycan                                                                                       | 32133  | 81.42  | 14 | 3  | 3  |
| Q3TXU5 | Deoxyhypusine synthase                                                                                  | 40642  | 112.4  | 9  | 2  | 2  |
| Q60710 | Deoxynucleoside triphosphate triphosphohydrolase SAMHD1                                                 | 75893  | 52.6   | 6  | 2  | 2  |
| Q99J56 | Derlin-1                                                                                                | 28835  | 67.87  | 9  | 2  | 2  |
| E9Q557 | Desmoplakin                                                                                             | 332913 | 78.82  | 2  | 4  | 3  |
| O08749 | Dihydrolipoyl dehydrogenase mitochondrial                                                               | 54272  | 184.65 | 22 | 7  | 7  |
| Q8BMF4 | Dihydrolipoyllysine-residue acetyltransferase component of pyruvate dehydrogenase complex mitochondrial | 67942  | 106.36 | 5  | 2  | 2  |
| Q99KK7 | Dipeptidyl peptidase 3                                                                                  | 82898  | 205.75 | 21 | 9  | 9  |
| Q8BPM0 | Disheveled-associated activator of morphogenesis 1                                                      | 123370 | 68.18  | 3  | 2  | 2  |
| Q99KV1 | DnaJ homolog subfamily B member 11                                                                      | 40555  | 55.5   | 8  | 2  | 2  |
| Q9DC23 | DnaJ homolog subfamily C member 10                                                                      | 90583  | 118.64 | 13 | 6  | 6  |
| O70152 | Dolichol-phosphate mannosyltransferase subunit 1                                                        | 29175  | 53.96  | 13 | 2  | 2  |
| O54734 | Dolichyl-diphosphooligosaccharide--protein glycosyltransferase 48 kDa subunit                           | 49028  | 200.96 | 42 | 12 | 12 |
| P46978 | Dolichyl-diphosphooligosaccharide--protein glycosyltransferase subunit STT3A                            | 80598  | 173.62 | 13 | 8  | 7  |

|        |                                                                              |        |        |    |    |    |
|--------|------------------------------------------------------------------------------|--------|--------|----|----|----|
| Q3TDQ1 | Dolichyl-diphosphooligosaccharide--protein glycosyltransferase subunit STT3B | 93246  | 44.83  | 4  | 3  | 2  |
| Q9QXS6 | Drebrin                                                                      | 77287  | 150.62 | 11 | 4  | 4  |
| P62627 | Dynein light chain roadblock-type 1                                          | 10990  | 101.67 | 29 | 2  | 2  |
| Q91ZU6 | Dystonin                                                                     | 834234 | 84.89  | 1  | 3  | 3  |
| Q8BL66 | Early endosome antigen 1                                                     | 160914 | 110.13 | 2  | 2  | 2  |
| Q6DYE8 | Ectonucleotide pyrophosphatase/phosphodiesterase family member 3             | 98662  | 177.66 | 25 | 14 | 14 |
| Q9D4J1 | EF-hand domain-containing protein D1                                         | 27000  | 63.03  | 17 | 2  | 2  |
| Q9D8Y0 | EF-hand domain-containing protein D2                                         | 26791  | 43.59  | 11 | 2  | 2  |
| Q99MS7 | EH domain-binding protein 1-like protein 1                                   | 184833 | 66.94  | 2  | 2  | 2  |
| P70372 | ELAV-like protein 1                                                          | 36169  | 65.86  | 11 | 3  | 3  |
| Q99LC5 | Electron transfer flavoprotein subunit alpha mitochondrial                   | 35009  | 146.13 | 30 | 5  | 5  |
| Q9DCW4 | Electron transfer flavoprotein subunit beta                                  | 27623  | 105.08 | 24 | 4  | 4  |
| P62869 | Elongin-B                                                                    | 13170  | 106.75 | 43 | 5  | 5  |
| P83940 | Elongin-C                                                                    | 12473  | 106.91 | 41 | 3  | 3  |
| O08579 | Emerin                                                                       | 29436  | 47.05  | 10 | 2  | 2  |
| Q7TQ95 | Endoplasmic reticulum junction formation protein lunapark                    | 47500  | 36.8   | 5  | 2  | 2  |
| Q3UVK0 | Endoplasmic reticulum metalloproteinase 1                                    | 100148 | 163.51 | 15 | 7  | 7  |
| P57759 | Endoplasmic reticulum resident protein 29                                    | 28823  | 106.32 | 22 | 5  | 5  |
| Q9D1Q6 | Endoplasmic reticulum resident protein 44                                    | 46853  | 166.1  | 18 | 5  | 4  |
| Q9DC16 | Endoplasmic reticulum-Golgi intermediate compartment protein 1               | 32562  | 89.84  | 16 | 3  | 3  |
| P84089 | Enhancer of rudimentary homolog                                              | 12259  | 43.48  | 27 | 2  | 2  |
| P42567 | Epidermal growth factor receptor substrate 15                                | 98471  | 79.93  | 6  | 3  | 3  |
| Q99JH8 | ER lumen protein-retaining receptor 1                                        | 24560  | 88.85  | 25 | 4  | 3  |
| Q8C7X2 | ER membrane protein complex subunit 1                                        | 111605 | 167.31 | 17 | 10 | 10 |
| Q9CRD2 | ER membrane protein complex subunit 2                                        | 34935  | 102.65 | 16 | 4  | 4  |
| Q99KI3 | ER membrane protein complex subunit 3                                        | 29980  | 109.4  | 15 | 3  | 3  |
| Q9EP72 | ER membrane protein complex subunit 7                                        | 26310  | 144.79 | 24 | 4  | 4  |
| O70378 | ER membrane protein complex subunit 8                                        | 23348  | 58.55  | 17 | 3  | 3  |
| Q8R180 | ERO1-like protein alpha                                                      | 54085  | 112.66 | 9  | 2  | 2  |
| P48024 | Eukaryotic translation initiation factor 1                                   | 12747  | 129.83 | 59 | 4  | 4  |
| Q8BMJ3 | Eukaryotic translation initiation factor 1A X-chromosomal                    | 16460  | 70.85  | 18 | 2  | 2  |
| Q3UGC7 | Eukaryotic translation initiation factor 3 subunit J-A                       | 29344  | 105.95 | 26 | 4  | 4  |

|        |                                                                     |        |        |    |    |    |
|--------|---------------------------------------------------------------------|--------|--------|----|----|----|
| Q66JS6 | Eukaryotic translation initiation factor 3 subunit J-B              | 29486  | 105.95 | 26 | 4  | 4  |
| Q9DBZ5 | Eukaryotic translation initiation factor 3 subunit K                | 25087  | 113.84 | 27 | 4  | 4  |
| O35250 | Exocyst complex component 7                                         | 79960  | 98.73  | 8  | 3  | 3  |
| Q6PGF7 | Exocyst complex component 8                                         | 81035  | 78.36  | 4  | 2  | 2  |
| P54731 | FAS-associated factor 1                                             | 73863  | 46.47  | 5  | 2  | 2  |
| Q922J9 | Fatty acyl-CoA reductase 1                                          | 59435  | 85.42  | 9  | 4  | 4  |
| Q9QZN4 | F-box only protein 6                                                | 34492  | 63.43  | 13 | 3  | 3  |
| Q6P6L0 | Filamin A-interacting protein 1-like                                | 129772 | 50.5   | 2  | 2  | 2  |
| A2AKG8 | Focadhesin                                                          | 198948 | 64.66  | 2  | 2  | 2  |
| P35505 | Fumarylacetoacetase                                                 | 46176  | 84.31  | 10 | 3  | 3  |
| Q9JL15 | Galectin-8                                                          | 36162  | 65.48  | 8  | 2  | 2  |
| Q9QYB5 | Gamma-adducin                                                       | 78777  | 87.73  | 6  | 3  | 3  |
| O08795 | Glucosidase 2 subunit beta                                          | 58793  | 124.18 | 12 | 4  | 4  |
| P26443 | Glutamate dehydrogenase 1 mitochondrial                             | 61337  | 238.92 | 29 | 12 | 12 |
| D3Z7P3 | Glutaminase kidney isoform mitochondrial                            | 73964  | 100.31 | 9  | 3  | 3  |
| Q8BFQ8 | Glutamine amidotransferase-like class 1 domain-containing protein 1 | 23277  | 69.23  | 14 | 2  | 2  |
| Q80Y14 | Glutaredoxin-related protein 5 mitochondrial                        | 16292  | 75.58  | 41 | 3  | 3  |
| P51855 | Glutathione synthetase                                              | 52247  | 82.35  | 7  | 3  | 3  |
| Q64521 | Glycerol-3-phosphate dehydrogenase mitochondrial                    | 80954  | 170.36 | 19 | 9  | 9  |
| Q8CHP8 | Glycerol-3-phosphate phosphatase                                    | 34541  | 98.35  | 9  | 2  | 2  |
| Q9D964 | Glycine amidinotransferase mitochondrial                            | 48297  | 168.89 | 21 | 6  | 6  |
| Q8CI94 | Glycogen phosphorylase brain form                                   | 96730  | 89.86  | 7  | 4  | 4  |
| Q9R062 | Glycogenin-1                                                        | 37402  | 50.27  | 8  | 3  | 2  |
| Q9CPV4 | Glyoxalase domain-containing protein 4                              | 33317  | 132.63 | 23 | 5  | 5  |
| Q9R087 | Glypican-6                                                          | 63057  | 111.41 | 11 | 4  | 4  |
| Q9CRA5 | Golgi phosphoprotein 3                                              | 33752  | 119.47 | 23 | 4  | 4  |
| Q6PD26 | GPI transamidase component PIG-S                                    | 61711  | 125.68 | 9  | 3  | 3  |
| Q99LP6 | GrpE protein homolog 1 mitochondrial                                | 24307  | 56.49  | 10 | 2  | 2  |
| Q9CQC9 | GTP-binding protein SAR1b                                           | 22382  | 85.91  | 21 | 3  | 2  |
| Q9DAS9 | Guanine nucleotide-binding protein G(I)/G(S)/G(O) subunit gamma-12  | 7997   | 91.2   | 42 | 2  | 2  |
| Q6R0H7 | Guanine nucleotide-binding protein G(s) subunit alpha isoforms XLas | 121505 | 249.1  | 15 | 13 | 11 |
| Q9CRB2 | H/ACA ribonucleoprotein complex subunit 2                           | 17247  | 110.48 | 22 | 2  | 2  |

|        |                                                            |        |        |    |    |    |
|--------|------------------------------------------------------------|--------|--------|----|----|----|
| Q9CQN1 | Heat shock protein 75 kDa mitochondrial                    | 80209  | 179.31 | 24 | 9  | 8  |
| O70252 | Heme oxygenase 2                                           | 35739  | 92.45  | 19 | 3  | 3  |
| Q9R257 | Heme-binding protein 1                                     | 21067  | 75.29  | 22 | 3  | 3  |
| P17710 | Hexokinase-1                                               | 108303 | 181.3  | 15 | 12 | 12 |
| O08528 | Hexokinase-2                                               | 102535 | 45.48  | 3  | 2  | 2  |
| P63158 | High mobility group protein B1                             | 24894  | 111.12 | 34 | 5  | 4  |
| P30681 | High mobility group protein B2                             | 24162  | 51.25  | 20 | 3  | 2  |
| Q61035 | Histidine--tRNA ligase cytoplasmic                         | 57432  | 129.4  | 13 | 5  | 5  |
| P43277 | Histone H1.3                                               | 22100  | 122.81 | 11 | 3  | 2  |
| P27661 | Histone H2AX                                               | 15143  | 171.02 | 48 | 6  | 4  |
| Q61425 | Hydroxyacyl-coenzyme A dehydrogenase mitochondrial         | 34464  | 77.55  | 13 | 2  | 2  |
| Q9JKR6 | Hypoxia up-regulated protein 1                             | 111181 | 274.18 | 37 | 21 | 21 |
| Q9CR20 | Immediate early response 3-interacting protein 1           | 9017   | 117.56 | 55 | 2  | 2  |
| O35344 | Importin subunit alpha-4                                   | 57773  | 187.76 | 41 | 10 | 9  |
| Q8VI75 | Importin-4                                                 | 119275 | 92.39  | 4  | 3  | 3  |
| Q9D892 | Inosine triphosphate pyrophosphatase                       | 21897  | 144.18 | 31 | 3  | 3  |
| P50096 | Inosine-5'-monophosphate dehydrogenase 1                   | 55279  | 60.37  | 10 | 3  | 3  |
| O55023 | Inositol monophosphatase 1                                 | 30436  | 60.99  | 11 | 3  | 3  |
| P49442 | Inositol polyphosphate 1-phosphatase                       | 43346  | 72.62  | 6  | 2  | 2  |
| Q9JHU9 | Inositol-3-phosphate synthase 1                            | 60932  | 70.73  | 7  | 2  | 2  |
| P15208 | Insulin receptor                                           | 155610 | 51.52  | 5  | 3  | 3  |
| Q9JHR7 | Insulin-degrading enzyme                                   | 117772 | 57.49  | 2  | 2  | 2  |
| P47877 | Insulin-like growth factor-binding protein 2               | 32847  | 100.93 | 19 | 4  | 4  |
| Q62470 | Integrin alpha-3                                           | 116745 | 289.65 | 36 | 26 | 26 |
| O70309 | Integrin beta-5                                            | 87909  | 152.11 | 15 | 7  | 7  |
| Q9Z1X4 | Interleukin enhancer-binding factor 3                      | 96021  | 46.87  | 3  | 2  | 2  |
| Q9D6R2 | Isocitrate dehydrogenase [NAD] subunit alpha mitochondrial | 39639  | 74.74  | 13 | 3  | 3  |
| P54071 | Isocitrate dehydrogenase [NADP] mitochondrial              | 50906  | 159.87 | 28 | 11 | 10 |
| P58044 | Isopentenyl-diphosphate Delta-isomerase 1                  | 26289  | 133.65 | 25 | 4  | 4  |
| Q92112 | Kelch domain-containing protein 4                          | 64861  | 103.24 | 5  | 2  | 2  |
| Q3UV17 | Keratin type II cytoskeletal 2 oral                        | 62845  | 98.05  | 10 | 4  | 2  |
| Q61595 | Kinectin                                                   | 152592 | 157.75 | 9  | 8  | 8  |

|        |                                                                   |        |        |    |    |    |
|--------|-------------------------------------------------------------------|--------|--------|----|----|----|
| E9Q5G3 | Kinesin-like protein KIF23                                        | 108776 | 116.76 | 5  | 4  | 4  |
| Q61029 | Lamina-associated polypeptide 2 isoforms beta/delta/epsilon/gamma | 50373  | 130.41 | 19 | 5  | 5  |
| P14733 | Lamin-B1                                                          | 66786  | 184.26 | 24 | 10 | 10 |
| Q8K0C4 | Lanosterol 14-alpha demethylase                                   | 56776  | 121.13 | 30 | 9  | 9  |
| Q8BLN5 | Lanosterol synthase                                               | 83141  | 69.5   | 5  | 3  | 3  |
| Q6PB66 | Leucine-rich PPR motif-containing protein mitochondrial           | 156614 | 85.97  | 4  | 6  | 5  |
| Q3UZ39 | Leucine-rich repeat flightless-interacting protein 1              | 79249  | 120.04 | 11 | 4  | 4  |
| Q9D1G5 | Leucine-rich repeat-containing protein 57                         | 26760  | 97     | 27 | 4  | 4  |
| Q9D154 | Leukocyte elastase inhibitor A                                    | 42575  | 123.99 | 27 | 7  | 6  |
| Q61735 | Leukocyte surface antigen CD47                                    | 33098  | 108.38 | 12 | 3  | 3  |
| Q61792 | LIM and SH3 domain protein 1                                      | 29994  | 76.1   | 10 | 2  | 2  |
| Q9ERG0 | LIM domain and actin-binding protein 1                            | 84060  | 117.91 | 13 | 6  | 6  |
| Q8C3X8 | Lipase maturation factor 2                                        | 79997  | 64.98  | 6  | 2  | 2  |
| Q8C8U0 | Liprin-beta-1                                                     | 108540 | 46.05  | 3  | 2  | 2  |
| Q8CGK3 | Lon protease homolog mitochondrial                                | 105843 | 108.82 | 9  | 4  | 4  |
| P51174 | Long-chain specific acyl-CoA dehydrogenase mitochondrial          | 47908  | 86.27  | 6  | 2  | 2  |
| Q9ERE7 | LRP chaperone MESD                                                | 25207  | 96.75  | 13 | 2  | 2  |
| Q3UN02 | Lysocardiolipin acyltransferase 1                                 | 44400  | 80.52  | 11 | 2  | 2  |
| Q8CHK3 | Lysophospholipid acyltransferase 7                                | 53436  | 84.44  | 10 | 2  | 2  |
| P17439 | Lysosomal acid glucosylceramidase                                 | 57622  | 86.09  | 12 | 3  | 3  |
| P16675 | Lysosomal protective protein                                      | 53844  | 89.32  | 6  | 2  | 2  |
| P17047 | Lysosome-associated membrane glycoprotein 2                       | 45681  | 98.79  | 9  | 4  | 4  |
| Q9DAR7 | m7GpppX diphosphatase                                             | 38988  | 139.77 | 26 | 6  | 6  |
| Q60754 | Macrophage receptor MARCO                                         | 52730  | 39.12  | 8  | 2  | 2  |
| Q9CQY5 | Magnesium transporter protein 1                                   | 37970  | 59.91  | 7  | 2  | 2  |
| Q6ZQI3 | Malectin                                                          | 32342  | 166.08 | 25 | 7  | 7  |
| Q99M71 | Mammalian ependymin-related protein 1                             | 25485  | 102.33 | 16 | 3  | 3  |
| Q80UM7 | Mannosyl-oligosaccharide glucosidase                              | 91831  | 54.37  | 4  | 2  | 2  |
| P53690 | Matrix metalloproteinase-14                                       | 65919  | 129.51 | 17 | 8  | 8  |
| Q9CZH7 | Matrix-remodeling-associated protein 7                            | 19458  | 167.51 | 36 | 4  | 4  |
| P45952 | Medium-chain specific acyl-CoA dehydrogenase mitochondrial        | 46481  | 115.32 | 11 | 2  | 2  |
| O55022 | Membrane-associated progesterone receptor component 1             | 21694  | 202.74 | 43 | 6  | 5  |



|        |                                                                             |        |        |    |    |    |
|--------|-----------------------------------------------------------------------------|--------|--------|----|----|----|
| Q80UU9 | Membrane-associated progesterone receptor component 2                       | 23334  | 184.52 | 35 | 5  | 4  |
| Q9CXI5 | Mesencephalic astrocyte-derived neurotrophic factor                         | 20374  | 131.46 | 27 | 4  | 4  |
| Q32NY4 | Metal transporter CNNM3                                                     | 76279  | 80.34  | 7  | 2  | 2  |
| Q99J09 | Methylosome protein 50                                                      | 36943  | 135.97 | 30 | 6  | 6  |
| Q9QXZ0 | Microtubule-actin cross-linking factor 1                                    | 831894 | 157.99 | 2  | 11 | 10 |
| Q8C052 | Microtubule-associated protein 1S                                           | 102939 | 67.99  | 7  | 4  | 4  |
| Q9D8V0 | Minor histocompatibility antigen H13                                        | 41748  | 128.52 | 19 | 4  | 4  |
| Q9CR62 | Mitochondrial 2-oxoglutarate/malate carrier protein                         | 34155  | 131.94 | 23 | 5  | 5  |
| Q9CQ92 | Mitochondrial fission 1 protein                                             | 17009  | 58.75  | 24 | 3  | 3  |
| Q925Q3 | Mitochondrial sodium/calcium exchanger protein                              | 64365  | 53.74  | 6  | 2  | 2  |
| Q9DC61 | Mitochondrial-processing peptidase subunit alpha                            | 58279  | 93.45  | 5  | 2  | 2  |
| Q921Y0 | MOB kinase activator 1A                                                     | 25080  | 79.22  | 11 | 2  | 2  |
| Q8BPB0 | MOB kinase activator 1B                                                     | 25091  | 79.22  | 11 | 2  | 2  |
| Q99LR1 | Monoacylglycerol lipase ABHD12                                              | 45270  | 85.08  | 13 | 4  | 4  |
| Q9R0E1 | Multifunctional procollagen lysine hydroxylase and glycosyltransferase LH3  | 84922  | 137.74 | 12 | 6  | 6  |
| Q8K5B2 | Multiple coagulation factor deficiency protein 2 homolog                    | 16168  | 81.15  | 28 | 2  | 2  |
| P97434 | Myosin phosphatase Rho-interacting protein                                  | 116408 | 56.3   | 4  | 3  | 3  |
| O08638 | Myosin-11                                                                   | 227026 | 217.7  | 6  | 12 | 2  |
| Q6URW6 | Myosin-14                                                                   | 228584 | 172.51 | 4  | 7  | 2  |
| P62774 | Myotrophin                                                                  | 12861  | 127.07 | 32 | 2  | 2  |
| Q9CWS0 | N(G) N(G)-dimethylarginine dimethylaminohydrolase 1                         | 31381  | 89.9   | 15 | 4  | 3  |
| P70441 | Na(+)/H(+) exchange regulatory cofactor NHE-RF1                             | 38600  | 102.35 | 14 | 3  | 3  |
| Q8BFR4 | N-acetylglucosamine-6-sulfatase                                             | 61175  | 107.03 | 13 | 5  | 4  |
| Q8K4Z3 | NAD(P)H-hydrate epimerase                                                   | 30973  | 99.55  | 16 | 3  | 3  |
| Q99KE1 | NAD-dependent malic enzyme mitochondrial                                    | 65799  | 141.71 | 16 | 4  | 4  |
| Q99LC3 | NADH dehydrogenase [ubiquinone] 1 alpha subcomplex subunit 10 mitochondrial | 40603  | 84.23  | 9  | 2  | 2  |
| Q7TMF3 | NADH dehydrogenase [ubiquinone] 1 alpha subcomplex subunit 12               | 17086  | 79.57  | 20 | 2  | 2  |
| Q9DC69 | NADH dehydrogenase [ubiquinone] 1 alpha subcomplex subunit 9 mitochondrial  | 42525  | 88.56  | 7  | 2  | 2  |
| Q91YT0 | NADH dehydrogenase [ubiquinone] flavoprotein 1 mitochondrial                | 50834  | 99.21  | 15 | 3  | 3  |
| Q9DCT2 | NADH dehydrogenase [ubiquinone] iron-sulfur protein 3 mitochondrial         | 30149  | 118.33 | 21 | 4  | 4  |
| Q9DC70 | NADH dehydrogenase [ubiquinone] iron-sulfur protein 7 mitochondrial         | 24683  | 102.03 | 20 | 2  | 2  |
| Q91VD9 | NADH-ubiquinone oxidoreductase 75 kDa subunit mitochondrial                 | 79777  | 127.29 | 15 | 6  | 6  |

|        |                                                     |        |        |    |    |    |
|--------|-----------------------------------------------------|--------|--------|----|----|----|
| P03921 | NADH-ubiquinone oxidoreductase chain 5              | 68475  | 91.34  | 5  | 2  | 2  |
| P37040 | NADPH--cytochrome P450 reductase                    | 77044  | 151.43 | 21 | 8  | 8  |
| Q8BWZ3 | N-alpha-acetyltransferase 25 NatB auxiliary subunit | 111708 | 71.39  | 5  | 2  | 2  |
| Q8BHG1 | Nardilysin                                          | 132891 | 153.1  | 14 | 10 | 10 |
| Q8VBW6 | NEDD8-activating enzyme E1 regulatory subunit       | 60274  | 76.85  | 11 | 3  | 3  |
| Q91YP2 | Neurolysin mitochondrial                            | 80429  | 63.39  | 8  | 4  | 3  |
| Q8BNY6 | Neuronal calcium sensor 1                           | 21879  | 142.14 | 43 | 6  | 6  |
| Q8BHN3 | Neutral alpha-glucosidase AB                        | 106911 | 231.62 | 31 | 23 | 23 |
| Q8BLF1 | Neutral cholesterol ester hydrolase 1               | 45740  | 134.83 | 20 | 4  | 4  |
| Q99KQ4 | Nicotinamide phosphoribosyltransferase              | 55447  | 46.25  | 7  | 2  | 2  |
| Q6GQT9 | Nodal modulator 1                                   | 133420 | 192.37 | 23 | 16 | 16 |
| Q99P88 | Nuclear pore complex protein Nup155                 | 155117 | 74.65  | 3  | 2  | 2  |
| P60670 | Nuclear protein localization protein 4 homolog      | 68017  | 79.18  | 12 | 3  | 3  |
| P61971 | Nuclear transport factor 2                          | 14478  | 54.25  | 34 | 2  | 2  |
| Q02819 | Nucleobindin-1                                      | 53409  | 120.11 | 12 | 4  | 4  |
| P81117 | Nucleobindin-2                                      | 50305  | 41.22  | 5  | 2  | 2  |
| E9Q5C9 | Nucleolar and coiled-body phosphoprotein 1          | 73698  | 62.4   | 4  | 2  | 2  |
| Q9D1X0 | Nucleolar protein 3                                 | 24568  | 134.75 | 29 | 3  | 3  |
| P97346 | Nucleoredoxin                                       | 48344  | 68.55  | 6  | 2  | 2  |
| P15532 | Nucleoside diphosphate kinase A                     | 17208  | 210.39 | 62 | 9  | 4  |
| Q6PIP5 | NudC domain-containing protein 1                    | 66705  | 79.17  | 4  | 2  | 2  |
| Q9JHW2 | Omega-amidase NIT2                                  | 30502  | 73.87  | 12 | 2  | 2  |
| P29758 | Ornithine aminotransferase mitochondrial            | 48355  | 224.41 | 45 | 12 | 12 |
| Q62422 | Osteoclast-stimulating factor 1                     | 23783  | 91.73  | 14 | 2  | 2  |
| O54901 | OX-2 membrane glycoprotein                          | 31256  | 57.02  | 8  | 2  | 2  |
| Q8CHP5 | Partner of Y14 and mago                             | 22690  | 60.13  | 13 | 2  | 2  |
| Q99JF8 | PC4 and SFRS1-interacting protein                   | 59697  | 78.87  | 4  | 2  | 2  |
| O70400 | PDZ and LIM domain protein 1                        | 35774  | 136.36 | 32 | 6  | 6  |
| P24369 | Peptidyl-prolyl cis-trans isomerase B               | 23713  | 170.03 | 41 | 10 | 10 |
| Q61576 | Peptidyl-prolyl cis-trans isomerase FKBP10          | 64698  | 107.82 | 8  | 4  | 4  |
| Q9D1M7 | Peptidyl-prolyl cis-trans isomerase FKBP11          | 22137  | 102.04 | 31 | 4  | 4  |
| P45878 | Peptidyl-prolyl cis-trans isomerase FKBP2           | 15344  | 150.3  | 39 | 3  | 3  |

|        |                                                                |        |        |    |    |    |
|--------|----------------------------------------------------------------|--------|--------|----|----|----|
| Q62446 | Peptidyl-prolyl cis-trans isomerase FKBP3                      | 25148  | 56.15  | 12 | 2  | 2  |
| Q9Z247 | Peptidyl-prolyl cis-trans isomerase FKBP9                      | 62996  | 89.02  | 10 | 4  | 4  |
| Q8R2Y8 | Peptidyl-tRNA hydrolase 2 mitochondrial                        | 19527  | 153.82 | 35 | 4  | 4  |
| O08807 | Peroxiredoxin-4                                                | 31053  | 205.25 | 49 | 10 | 8  |
| Q9DC50 | Peroxisomal carnitine O-octanoyltransferase                    | 70264  | 70.07  | 5  | 2  | 2  |
| Q9R0A0 | Peroxisomal membrane protein PEX14                             | 41208  | 93.56  | 22 | 4  | 4  |
| Q501J7 | Phosphatase and actin regulator 4                              | 76632  | 135.29 | 11 | 5  | 5  |
| Q8VEM8 | Phosphate carrier protein mitochondrial                        | 39632  | 186.29 | 36 | 11 | 11 |
| Q99L43 | Phosphatidate cytidyltransferase 2                             | 51314  | 100.98 | 8  | 2  | 2  |
| Q9EP69 | Phosphatidylinositide phosphatase SAC1                         | 66944  | 43.63  | 4  | 2  | 2  |
| P53810 | Phosphatidylinositol transfer protein alpha isoform            | 31893  | 126.47 | 20 | 3  | 3  |
| P53811 | Phosphatidylinositol transfer protein beta isoform             | 31487  | 67.35  | 17 | 3  | 3  |
| Q7TSV4 | Phosphoglucomutase-2                                           | 68748  | 51.88  | 7  | 2  | 2  |
| P27612 | Phospholipase A-2-activating protein                           | 87221  | 149.58 | 14 | 6  | 6  |
| Q99JY8 | Phospholipid phosphatase 3                                     | 35216  | 42.13  | 10 | 2  | 2  |
| E2JF22 | Piezo-type mechanosensitive ion channel component 1            | 292000 | 76.94  | 1  | 2  | 2  |
| P70207 | Plexin-A2                                                      | 211533 | 53.24  | 2  | 2  | 2  |
| Q9Z1W8 | Potassium-transporting ATPase alpha chain 2                    | 114726 | 121.91 | 6  | 6  | 2  |
| Q9JIG8 | PRA1 family protein 2                                          | 19478  | 85.84  | 16 | 2  | 2  |
| Q3TVI8 | Pre-B-cell leukemia transcription factor-interacting protein 1 | 81165  | 138.66 | 15 | 6  | 6  |
| P61759 | Prefoldin subunit 3                                            | 22436  | 132.8  | 21 | 3  | 3  |
| Q9WU28 | Prefoldin subunit 5                                            | 17356  | 139.28 | 36 | 4  | 4  |
| Q03958 | Prefoldin subunit 6                                            | 14455  | 105.85 | 31 | 3  | 3  |
| Q9CQF9 | Prenylcysteine oxidase                                         | 56495  | 138.18 | 11 | 3  | 3  |
| Q8C7K6 | Prenylcysteine oxidase-like                                    | 54875  | 83.8   | 8  | 3  | 3  |
| Q9R0E2 | Procollagen-lysine 2-oxoglutarate 5-dioxygenase 1              | 83595  | 125.99 | 12 | 6  | 6  |
| Q9R0B9 | Procollagen-lysine 2-oxoglutarate 5-dioxygenase 2              | 84488  | 190.59 | 22 | 11 | 11 |
| Q8VE70 | Programmed cell death protein 10                               | 24716  | 38.9   | 11 | 2  | 2  |
| P56812 | Programmed cell death protein 5                                | 14275  | 93.65  | 37 | 4  | 4  |
| P28798 | Progranulin                                                    | 63458  | 91.78  | 5  | 2  | 2  |
| P67778 | Prohibitin                                                     | 29820  | 214.96 | 71 | 13 | 13 |
| O35129 | Prohibitin-2                                                   | 33296  | 196.83 | 49 | 13 | 13 |

|        |                                                                            |        |        |    |    |    |
|--------|----------------------------------------------------------------------------|--------|--------|----|----|----|
| Q9WUQ2 | Prolactin regulatory element-binding protein                               | 45437  | 52.12  | 6  | 2  | 2  |
| Q3V1T4 | Prolyl 3-hydroxylase 1                                                     | 83651  | 86.94  | 4  | 2  | 2  |
| Q60716 | Prolyl 4-hydroxylase subunit alpha-2                                       | 61002  | 123.58 | 16 | 5  | 5  |
| O35074 | Prostacyclin synthase                                                      | 57047  | 137.3  | 20 | 7  | 7  |
| Q9R0Q7 | Prostaglandin E synthase 3                                                 | 18721  | 158.15 | 31 | 4  | 4  |
| P22437 | Prostaglandin G/H synthase 1                                               | 69042  | 184.21 | 31 | 11 | 11 |
| Q9JKV1 | Proteasomal ubiquitin receptor ADRM1                                       | 42060  | 74.43  | 5  | 2  | 2  |
| P97371 | Proteasome activator complex subunit 1                                     | 28673  | 123.44 | 23 | 3  | 3  |
| P97372 | Proteasome activator complex subunit 2                                     | 27057  | 119.5  | 16 | 2  | 2  |
| P49722 | Proteasome subunit alpha type-2                                            | 25927  | 230.6  | 46 | 9  | 9  |
| O55234 | Proteasome subunit beta type-5                                             | 28532  | 196.35 | 35 | 10 | 10 |
| Q91VR8 | Protein BRICK1                                                             | 8761   | 38.4   | 25 | 2  | 2  |
| Q9QXT0 | Protein canopy homolog 2                                                   | 20767  | 104.84 | 23 | 3  | 3  |
| Q8BQ47 | Protein canopy homolog 4                                                   | 28094  | 59.66  | 17 | 2  | 2  |
| Q4VAA2 | Protein CDV3                                                               | 29729  | 116.98 | 32 | 5  | 5  |
| Q9CQ89 | Protein CutA                                                               | 18865  | 78.49  | 18 | 2  | 2  |
| O08808 | Protein diaphanous homolog 1                                               | 139343 | 83.28  | 6  | 3  | 3  |
| P08003 | Protein disulfide-isomerase A4                                             | 71982  | 257.7  | 39 | 21 | 21 |
| Q921X9 | Protein disulfide-isomerase A5                                             | 59267  | 63.27  | 5  | 2  | 2  |
| Q9D0F3 | Protein ERGIC-53                                                           | 57789  | 173.65 | 24 | 6  | 6  |
| Q8VE88 | Protein FAM114A2                                                           | 54045  | 78.42  | 8  | 3  | 3  |
| Q8BYI8 | Protein FAM234B                                                            | 67031  | 94.7   | 12 | 3  | 3  |
| Q61239 | Protein farnesyltransferase/geranylgeranyltransferase type-1 subunit alpha | 44013  | 104.82 | 13 | 3  | 3  |
| Q9CR64 | Protein kish-A                                                             | 8074   | 58.62  | 25 | 2  | 2  |
| Q8JZS0 | Protein lin-7 homolog A                                                    | 25993  | 81.96  | 11 | 2  | 2  |
| O88952 | Protein lin-7 homolog C                                                    | 21834  | 81.96  | 13 | 2  | 2  |
| Q80WJ7 | Protein LYRIC                                                              | 63846  | 152.07 | 12 | 7  | 7  |
| Q8K3C3 | Protein LZIC                                                               | 21537  | 111.38 | 17 | 2  | 2  |
| Q9JHP7 | Protein O-glucosyltransferase 2                                            | 57985  | 94.29  | 9  | 3  | 3  |
| Q9D0B6 | Protein PBDC1                                                              | 22223  | 143.1  | 43 | 6  | 6  |
| Q9DBR7 | Protein phosphatase 1 regulatory subunit 12A                               | 114996 | 60.96  | 3  | 2  | 2  |
| Q62084 | Protein phosphatase 1 regulatory subunit 14B                               | 15957  | 147.13 | 69 | 7  | 7  |

|        |                                                         |        |        |    |    |    |
|--------|---------------------------------------------------------|--------|--------|----|----|----|
| Q61074 | Protein phosphatase 1G                                  | 58728  | 59.24  | 11 | 2  | 2  |
| Q9DCL8 | Protein phosphatase inhibitor 2                         | 23119  | 102.01 | 9  | 2  | 2  |
| Q3UPH1 | Protein PRRC1                                           | 46298  | 110.52 | 10 | 2  | 2  |
| Q7TSC1 | Protein PRRC2A                                          | 229200 | 65.54  | 3  | 2  | 2  |
| Q3TLH4 | Protein PRRC2C                                          | 310891 | 75.8   | 3  | 4  | 4  |
| Q9Z2G6 | Protein sel-1 homolog 1                                 | 88340  | 62.29  | 7  | 3  | 3  |
| Q9EQU5 | Protein SET                                             | 33378  | 167.01 | 35 | 6  | 6  |
| Q9CX34 | Protein SGT1 homolog                                    | 38159  | 191.3  | 29 | 6  | 6  |
| Q9D662 | Protein transport protein Sec23B                        | 86437  | 200.92 | 19 | 10 | 7  |
| P61620 | Protein transport protein Sec61 subunit alpha isoform 1 | 52265  | 224.28 | 36 | 11 | 7  |
| Q6DID7 | Protein wntless homolog                                 | 62188  | 53.88  | 7  | 3  | 3  |
| Q9EPK2 | Protein XRP2                                            | 39377  | 90.67  | 9  | 2  | 2  |
| Q99LX0 | Protein/nucleic acid deglycase DJ-1                     | 20021  | 142.43 | 26 | 4  | 4  |
| P26350 | Prothymosin alpha                                       | 12254  | 157.22 | 41 | 6  | 6  |
| Q8K183 | Pyridoxal kinase                                        | 35015  | 95.13  | 12 | 2  | 2  |
| Q9DCC4 | Pyrroline-5-carboxylate reductase 3                     | 28721  | 85.07  | 11 | 2  | 2  |
| P52480 | Pyruvate kinase PKM                                     | 57845  | 398.65 | 66 | 39 | 38 |
| P47199 | Quinone oxidoreductase                                  | 35269  | 75.26  | 11 | 2  | 2  |
| P50396 | Rab GDP dissociation inhibitor alpha                    | 50522  | 279.68 | 46 | 15 | 9  |
| Q9WVM1 | Rac GTPase-activating protein 1                         | 70159  | 72.14  | 5  | 2  | 2  |
| Q9JHS3 | Ragulator complex protein LAMTOR2                       | 13480  | 68.29  | 33 | 3  | 3  |
| O88653 | Ragulator complex protein LAMTOR3                       | 13553  | 89.75  | 44 | 3  | 3  |
| Q9D1L9 | Ragulator complex protein LAMTOR5                       | 9642   | 128.07 | 44 | 2  | 2  |
| Q9CT10 | Ran-binding protein 3                                   | 52573  | 99.09  | 6  | 2  | 2  |
| P97379 | Ras GTPase-activating protein-binding protein 2         | 54088  | 80.85  | 8  | 2  | 2  |
| Q99P58 | Ras-related protein Rab-27B                             | 24560  | 104.92 | 18 | 3  | 2  |
| Q921E2 | Ras-related protein Rab-31                              | 21331  | 99.53  | 14 | 2  | 2  |
| P55258 | Ras-related protein Rab-8A                              | 23668  | 116.26 | 23 | 4  | 2  |
| P18052 | Receptor-type tyrosine-protein phosphatase alpha        | 93698  | 60.37  | 4  | 2  | 2  |
| Q05186 | Reticulocalbin-1                                        | 38113  | 146.54 | 18 | 5  | 5  |
| Q8BP92 | Reticulocalbin-2                                        | 37271  | 148.05 | 27 | 5  | 5  |
| Q9ES97 | Reticulon-3                                             | 103879 | 161.98 | 6  | 5  | 5  |

|        |                                                                                  |        |        |    |    |    |
|--------|----------------------------------------------------------------------------------|--------|--------|----|----|----|
| Q9QYF1 | Retinol dehydrogenase 11                                                         | 35148  | 60.3   | 8  | 2  | 2  |
| Q61599 | Rho GDP-dissociation inhibitor 2                                                 | 22851  | 113.57 | 36 | 3  | 3  |
| Q5FWK3 | Rho GTPase-activating protein 1                                                  | 50411  | 181.11 | 32 | 10 | 10 |
| Q91VI7 | Ribonuclease inhibitor                                                           | 49817  | 278.24 | 65 | 18 | 18 |
| P11157 | Ribonucleoside-diphosphate reductase subunit M2                                  | 45096  | 65.78  | 6  | 2  | 2  |
| Q9JI75 | Ribosyldihydronicotinamide dehydrogenase [quinone]                               | 26248  | 99.35  | 15 | 2  | 2  |
| Q91VM5 | RNA binding motif protein X-linked-like-1                                        | 42162  | 75.81  | 10 | 3  | 3  |
| Q9D706 | RNA polymerase II-associated protein 3                                           | 74096  | 49.98  | 5  | 2  | 2  |
| Q9WV02 | RNA-binding motif protein X chromosome                                           | 42301  | 75.81  | 10 | 3  | 3  |
| O89086 | RNA-binding protein 3                                                            | 16605  | 105.08 | 30 | 2  | 2  |
| Q61545 | RNA-binding protein EWS                                                          | 68462  | 65.34  | 4  | 2  | 2  |
| Q9CQK7 | RWD domain-containing protein 1                                                  | 27785  | 102.36 | 17 | 2  | 2  |
| O55143 | Sarcoplasmic/endoplasmic reticulum calcium ATPase 2                              | 114858 | 234.95 | 20 | 15 | 9  |
| Q80YR5 | Scaffold attachment factor B2                                                    | 111839 | 91.88  | 6  | 3  | 3  |
| Q8CFE4 | SCY1-like protein 2                                                              | 103317 | 108.17 | 8  | 4  | 4  |
| Q8BRF7 | Sec1 family domain-containing protein 1                                          | 72323  | 68.13  | 6  | 2  | 2  |
| Q6NZC7 | SEC23-interacting protein                                                        | 110780 | 62.66  | 8  | 4  | 4  |
| Q9ERN0 | Secretory carrier-associated membrane protein 2                                  | 36465  | 84.11  | 10 | 2  | 2  |
| Q9R1T4 | Septin-6                                                                         | 49620  | 118.51 | 22 | 6  | 2  |
| Q8CHH9 | Septin-8                                                                         | 49812  | 166.44 | 26 | 7  | 4  |
| P97363 | Serine palmitoyltransferase 2                                                    | 62982  | 142.82 | 15 | 5  | 5  |
| O35326 | Serine/arginine-rich splicing factor 5                                           | 30891  | 63.09  | 10 | 2  | 2  |
| Q99KH8 | Serine/threonine-protein kinase 24                                               | 47954  | 130.47 | 18 | 4  | 4  |
| O88643 | Serine/threonine-protein kinase PAK 1                                            | 60737  | 81.17  | 10 | 4  | 3  |
| Q5F2E8 | Serine/threonine-protein kinase TAO1                                             | 116050 | 73.85  | 3  | 3  | 3  |
| Q60996 | Serine/threonine-protein phosphatase 2A 56 kDa regulatory subunit gamma isoform  | 60825  | 77.84  | 6  | 2  | 2  |
| Q7TNP2 | Serine/threonine-protein phosphatase 2A 65 kDa regulatory subunit A beta isoform | 65934  | 195.45 | 18 | 8  | 2  |
| P58389 | Serine/threonine-protein phosphatase 2A activator                                | 36710  | 100.48 | 12 | 2  | 2  |
| Q62087 | Serum paraoxonase/lactonase 3                                                    | 39351  | 98.98  | 15 | 3  | 3  |
| Q9R0P3 | S-formylglutathione hydrolase                                                    | 31320  | 263.32 | 70 | 10 | 10 |
| Q8R550 | SH3 domain-containing kinase-binding protein 1                                   | 78170  | 104.93 | 5  | 3  | 3  |
| Q99JR1 | Sideroflexin-1                                                                   | 35649  | 57.75  | 12 | 2  | 2  |

|        |                                                                         |       |        |    |    |   |
|--------|-------------------------------------------------------------------------|-------|--------|----|----|---|
| Q91V61 | Sideroflexin-3                                                          | 35406 | 128.42 | 19 | 3  | 3 |
| O55242 | Sigma non-opioid intracellular receptor 1                               | 25250 | 102.48 | 11 | 2  | 2 |
| Q9R0P6 | Signal peptidase complex catalytic subunit SEC11A                       | 20626 | 44.95  | 11 | 2  | 2 |
| Q9CYN2 | Signal peptidase complex subunit 2                                      | 24978 | 66.38  | 16 | 2  | 2 |
| Q6ZWQ7 | Signal peptidase complex subunit 3                                      | 20313 | 93.1   | 28 | 4  | 4 |
| Q9JF9  | Signal peptide peptidase-like 2A                                        | 58129 | 104.03 | 5  | 2  | 2 |
| P16254 | Signal recognition particle 14 kDa protein                              | 12510 | 60.99  | 24 | 2  | 2 |
| P47758 | Signal recognition particle receptor subunit beta                       | 29579 | 160.66 | 25 | 5  | 5 |
| Q8BJU0 | Small glutamine-rich tetratricopeptide repeat-containing protein alpha  | 34322 | 57.6   | 11 | 3  | 3 |
| P14094 | Sodium/potassium-transporting ATPase subunit beta-1                     | 35195 | 117.93 | 16 | 4  | 4 |
| Q8K2P7 | Sodium-coupled neutral amino acid transporter 1                         | 53795 | 92.31  | 7  | 3  | 3 |
| Q9EPR4 | Solute carrier family 23 member 2                                       | 70049 | 180.09 | 19 | 7  | 7 |
| Q64442 | Sorbitol dehydrogenase                                                  | 38249 | 49.39  | 9  | 2  | 2 |
| P07214 | SPARC                                                                   | 34450 | 130.77 | 17 | 5  | 5 |
| Q8R1X6 | Spartin                                                                 | 72655 | 58.98  | 4  | 2  | 2 |
| O09005 | Sphingolipid delta(4)-desaturase DES1                                   | 38241 | 104.33 | 16 | 3  | 3 |
| O08530 | Sphingosine 1-phosphate receptor 1                                      | 42639 | 46.79  | 6  | 2  | 2 |
| Q8R0X7 | Sphingosine-1-phosphate lyase 1                                         | 63677 | 126.23 | 11 | 5  | 5 |
| Q9Z1N5 | Spliceosome RNA helicase Ddx39b                                         | 49035 | 131.9  | 21 | 10 | 3 |
| Q9D883 | Splicing factor U2AF 35 kDa subunit                                     | 27815 | 59.05  | 13 | 2  | 2 |
| P26369 | Splicing factor U2AF 65 kDa subunit                                     | 53517 | 82.29  | 7  | 3  | 3 |
| P52019 | Squalene monooxygenase                                                  | 63770 | 93.51  | 5  | 2  | 2 |
| Q8C7E7 | Starch-binding domain-containing protein 1                              | 36127 | 56.61  | 12 | 2  | 2 |
| Q99JB2 | Stomatin-like protein 2 mitochondrial                                   | 38385 | 68.68  | 9  | 2  | 2 |
| O55106 | Striatin                                                                | 85966 | 74.65  | 6  | 3  | 3 |
| Q9ERG2 | Striatin-3                                                              | 87150 | 36.54  | 4  | 2  | 2 |
| Q8K2B3 | Succinate dehydrogenase [ubiquinone] flavoprotein subunit mitochondrial | 72585 | 190.82 | 23 | 9  | 9 |
| Q9D0K2 | Succinyl-CoA:3-ketoacid coenzyme A transferase 1 mitochondrial          | 55989 | 189.18 | 36 | 8  | 8 |
| Q62273 | Sulfate transporter                                                     | 81604 | 45.19  | 3  | 2  | 2 |
| P09671 | Superoxide dismutase [Mn] mitochondrial                                 | 24603 | 127.48 | 19 | 3  | 3 |
| Q64310 | Surfeit locus protein 4                                                 | 30381 | 124.05 | 16 | 3  | 3 |
| Q9CQW1 | Synaptobrevin homolog YKT6                                              | 22314 | 116.96 | 24 | 4  | 4 |

|        |                                                                  |        |        |    |   |   |
|--------|------------------------------------------------------------------|--------|--------|----|---|---|
| Q3TIR3 | Synembryn-A                                                      | 59847  | 58.88  | 5  | 2 | 2 |
| Q00262 | Syntaxin-2                                                       | 33178  | 59.84  | 16 | 2 | 2 |
| O70439 | Syntaxin-7                                                       | 29821  | 95.63  | 20 | 3 | 3 |
| Q64324 | Syntaxin-binding protein 2                                       | 66358  | 86.54  | 7  | 2 | 2 |
| Q9R233 | Tapasin                                                          | 49736  | 36.24  | 5  | 2 | 2 |
| P97493 | Thioredoxin mitochondrial                                        | 18255  | 120.13 | 42 | 4 | 4 |
| Q9CQU0 | Thioredoxin domain-containing protein 12                         | 19049  | 93.58  | 14 | 2 | 2 |
| Q9CQM5 | Thioredoxin domain-containing protein 17                         | 14015  | 89.63  | 27 | 3 | 3 |
| P20108 | Thioredoxin-dependent peroxide reductase mitochondrial           | 28127  | 152.14 | 33 | 6 | 6 |
| Q8VBT0 | Thioredoxin-related transmembrane protein 1                      | 31396  | 98.26  | 18 | 4 | 4 |
| Q9D710 | Thioredoxin-related transmembrane protein 2                      | 33943  | 80.28  | 9  | 2 | 2 |
| O08583 | THO complex subunit 4                                            | 26940  | 96.8   | 15 | 2 | 2 |
| P20352 | Tissue factor                                                    | 32935  | 89.45  | 9  | 2 | 2 |
| Q80ZI1 | TMF-regulated nuclear protein 1                                  | 23086  | 36.26  | 16 | 2 | 2 |
| Q9ER41 | Torsin-1B                                                        | 37818  | 86.4   | 9  | 2 | 2 |
| P37804 | Transgelin                                                       | 22576  | 83.51  | 21 | 4 | 4 |
| Q7TN37 | Transient receptor potential cation channel subfamily M member 4 | 135760 | 40.32  | 2  | 2 | 2 |
| Q8VHE0 | Translocation protein SEC63 homolog                              | 87870  | 152.11 | 16 | 7 | 7 |
| P50637 | Translocator protein                                             | 18841  | 151.64 | 37 | 4 | 4 |
| Q9CY50 | Translocon-associated protein subunit alpha                      | 32065  | 122.01 | 18 | 4 | 4 |
| Q62186 | Translocon-associated protein subunit delta                      | 18937  | 116.87 | 25 | 3 | 3 |
| Q9DCF9 | Translocon-associated protein subunit gamma                      | 21064  | 118.98 | 22 | 2 | 2 |
| Q3V009 | Transmembrane emp24 domain-containing protein 1                  | 25263  | 87.42  | 15 | 2 | 2 |
| Q9R0Q3 | Transmembrane emp24 domain-containing protein 2                  | 22705  | 101.11 | 25 | 3 | 3 |
| Q9CXE7 | Transmembrane emp24 domain-containing protein 5                  | 26172  | 89.15  | 13 | 2 | 2 |
| Q99KF1 | Transmembrane emp24 domain-containing protein 9                  | 27127  | 77.41  | 20 | 4 | 3 |
| Q9D771 | Transmembrane protein 206                                        | 40178  | 66.41  | 14 | 2 | 2 |
| Q9CR67 | Transmembrane protein 33                                         | 28031  | 73.69  | 9  | 2 | 2 |
| Q9DBS1 | Transmembrane protein 43                                         | 44783  | 181.43 | 32 | 8 | 8 |
| Q8BXN9 | Transmembrane protein 87A                                        | 63380  | 71.18  | 6  | 2 | 2 |
| Q8BI84 | Transport and Golgi organization protein 1 homolog               | 213673 | 63.29  | 2  | 2 | 2 |
| O89023 | Tripeptidyl-peptidase 1                                          | 61342  | 93.81  | 10 | 3 | 3 |



|        |                                                                     |        |        |    |    |    |
|--------|---------------------------------------------------------------------|--------|--------|----|----|----|
| Q9JHJ0 | Tropomodulin-3                                                      | 39503  | 47.8   | 9  | 2  | 2  |
| P58771 | Tropomyosin alpha-1 chain                                           | 32681  | 265.66 | 38 | 16 | 5  |
| P58774 | Tropomyosin beta chain                                              | 32837  | 210.5  | 43 | 12 | 7  |
| Q9CWF2 | Tubulin beta-2B chain                                               | 49953  | 312.75 | 72 | 23 | 4  |
| Q8VCK3 | Tubulin gamma-2 chain                                               | 51122  | 77.1   | 12 | 3  | 3  |
| Q9QZM4 | Tumor necrosis factor receptor superfamily member 10B               | 42165  | 71.13  | 8  | 2  | 2  |
| Q62393 | Tumor protein D52                                                   | 24313  | 71.66  | 14 | 2  | 2  |
| Q9CYZ2 | Tumor protein D54                                                   | 24043  | 113.54 | 29 | 5  | 5  |
| P35235 | Tyrosine-protein phosphatase non-receptor type 11                   | 68460  | 111.89 | 14 | 5  | 5  |
| Q91WQ3 | Tyrosine--tRNA ligase cytoplasmic                                   | 59105  | 147.92 | 13 | 5  | 5  |
| O35900 | U6 snRNA-associated Sm-like protein LSm2                            | 10835  | 64.98  | 28 | 2  | 2  |
| Q6ZWM4 | U6 snRNA-associated Sm-like protein LSm8                            | 10403  | 113.64 | 52 | 3  | 3  |
| Q8R317 | Ubiquilin-1                                                         | 61976  | 144.86 | 11 | 4  | 2  |
| Q9QZM0 | Ubiquilin-2                                                         | 67351  | 162.31 | 9  | 4  | 2  |
| Q9WUP7 | Ubiquitin carboxyl-terminal hydrolase isozyme L5                    | 37617  | 48.83  | 7  | 2  | 2  |
| P70362 | Ubiquitin recognition factor in ER-associated degradation protein 1 | 34481  | 51.66  | 10 | 2  | 2  |
| Q80X50 | Ubiquitin-associated protein 2-like                                 | 116799 | 69.25  | 3  | 2  | 2  |
| Q9D2M8 | Ubiquitin-conjugating enzyme E2 variant 2                           | 16367  | 74.01  | 20 | 3  | 3  |
| Q8VCH8 | UBX domain-containing protein 4                                     | 56472  | 113.14 | 8  | 2  | 2  |
| Q6P5E4 | UDP-glucose:glycoprotein glucosyltransferase 1                      | 176433 | 215.29 | 21 | 23 | 23 |
| A2A7S8 | Uncharacterized protein KIAA1522                                    | 104842 | 81.58  | 3  | 2  | 2  |
| P54726 | UV excision repair protein RAD23 homolog A                          | 39707  | 113.81 | 19 | 3  | 2  |
| P54728 | UV excision repair protein RAD23 homolog B                          | 43513  | 182.7  | 48 | 12 | 11 |
| Q9QZ88 | Vacuolar protein sorting-associated protein 29                      | 20496  | 40.99  | 12 | 2  | 2  |
| Q99KU0 | Vacuole membrane protein 1                                          | 45960  | 50.6   | 11 | 2  | 2  |
| P50544 | Very long-chain specific acyl-CoA dehydrogenase mitochondrial       | 70876  | 102.54 | 12 | 5  | 5  |
| O70503 | Very-long-chain 3-oxoacyl-CoA reductase                             | 34742  | 176.72 | 49 | 12 | 12 |
| O70404 | Vesicle-associated membrane protein 8                               | 11451  | 86.52  | 14 | 2  | 2  |
| Q9WV55 | Vesicle-associated membrane protein-associated protein A            | 27855  | 168.59 | 44 | 9  | 8  |
| Q9QY76 | Vesicle-associated membrane protein-associated protein B            | 26946  | 67.66  | 14 | 3  | 2  |
| P46460 | Vesicle-fusing ATPase                                               | 82613  | 58.39  | 5  | 3  | 3  |
| O08547 | Vesicle-trafficking protein SEC22b                                  | 24741  | 90.48  | 15 | 2  | 2  |

|        |                                                      |       |        |    |   |   |
|--------|------------------------------------------------------|-------|--------|----|---|---|
| Q60931 | Voltage-dependent anion-selective channel protein 3  | 30753 | 101.73 | 15 | 3 | 2 |
| Q66JT1 | Volume-regulated anion channel subunit LRRC8E        | 90501 | 40.48  | 4  | 2 | 2 |
| Q99KC8 | von Willebrand factor A domain-containing protein 5A | 87143 | 52.06  | 5  | 3 | 3 |
| Q9Z1G3 | V-type proton ATPase subunit C 1                     | 43888 | 91.31  | 14 | 2 | 2 |
| Q9D1K2 | V-type proton ATPase subunit F                       | 13370 | 93.98  | 30 | 2 | 2 |
| Q9Z2C8 | Y-box-binding protein 2                              | 38271 | 174.77 | 27 | 9 | 5 |
| Q3TIV5 | Zinc finger CCCH domain-containing protein 15        | 48327 | 90.62  | 7  | 2 | 2 |
| Q31125 | Zinc transporter SLC39A7                             | 50657 | 103.47 | 9  | 2 | 2 |
| Q6P5F6 | Zinc transporter ZIP10                               | 94394 | 103.64 | 4  | 2 | 2 |
| Q8C145 | Zinc transporter ZIP6                                | 86380 | 62.89  | 3  | 2 | 2 |

**Table S4.** Proteins exclusively present in Large Evs. For each protein Acc. No, description, -10lgP, sequence coverage, the number of identified peptides and the number of unique peptides are reported.

| Accession | Description                                                       | Avg. Mass | -10lgP | Coverage (%) | Peptides | Unique peptides |
|-----------|-------------------------------------------------------------------|-----------|--------|--------------|----------|-----------------|
| Q8K2J0    | 1-phosphatidylinositol 4 5-bisphosphate phosphodiesterase delta-3 | 88607     | 144.07 | 14           | 5        | 5               |
| Q99J99    | 3-mercaptopyruvate sulfurtransferase                              | 33097     | 54.74  | 15           | 2        | 2               |
| Q6ZWY3    | 40S ribosomal protein S27-like                                    | 9477      | 125.76 | 39           | 4        | 2               |
| Q5EG47    | 5'-AMP-activated protein kinase catalytic subunit alpha-1         | 63929     | 117.17 | 7            | 3        | 3               |
| P53026    | 60S ribosomal protein L10a                                        | 24916     | 199.18 | 38           | 10       | 10              |
| O55142    | 60S ribosomal protein L35a                                        | 12554     | 51.79  | 15           | 3        | 3               |
| Q5SWU9    | Acetyl-CoA carboxylase 1                                          | 265254    | 206.43 | 12           | 19       | 19              |
| Q9Z2N8    | Actin-like protein 6A                                             | 47448     | 76.44  | 16           | 4        | 4               |
| P55264    | Adenosine kinase                                                  | 40149     | 131.13 | 19           | 4        | 4               |
| Q640N1    | Adipocyte enhancer-binding protein 1                              | 128365    | 67.38  | 3            | 2        | 2               |
| Q9CQW2    | ADP-ribosylation factor-like protein 8B                           | 21539     | 140.94 | 51           | 8        | 3               |
| Q8CG76    | Aflatoxin B1 aldehyde reductase member 2                          | 40612     | 108.8  | 11           | 3        | 3               |
| Q9DBR0    | A-kinase anchor protein 8                                         | 76294     | 47.46  | 9            | 2        | 2               |
| Q6GQT1    | Alpha-2-macroglobulin-P                                           | 164352    | 172.89 | 3            | 4        | 3               |
| P00687    | Alpha-amylase 1                                                   | 57644     | 37.94  | 4            | 2        | 2               |
| Q91W96    | Anaphase-promoting complex subunit 4                              | 91708     | 74.63  | 5            | 3        | 3               |
| Q9WVM3    | Anaphase-promoting complex subunit 7                              | 63021     | 105.41 | 7            | 2        | 2               |
| P32261    | Antithrombin-III                                                  | 52004     | 88.15  | 10           | 3        | 3               |
| E9Q414    | Apolipoprotein B-100                                              | 509437    | 58.93  | 1            | 2        | 2               |
| Q99KN1    | Arrestin domain-containing protein 1                              | 46330     | 189.14 | 40           | 8        | 8               |
| Q99LE6    | ATP-binding cassette sub-family F member 2                        | 71782     | 42.24  | 4            | 2        | 2               |
| P47857    | ATP-dependent 6-phosphofructokinase muscle type                   | 85269     | 67.29  | 7            | 4        | 3               |
| Q9WUA3    | ATP-dependent 6-phosphofructokinase platelet type                 | 85455     | 187.7  | 20           | 11       | 9               |
| Q8K363    | ATP-dependent RNA helicase DDX18                                  | 74181     | 118.57 | 13           | 5        | 5               |
| Q9ESV0    | ATP-dependent RNA helicase DDX24                                  | 96429     | 60.1   | 4            | 2        | 2               |
| Q8VDW0    | ATP-dependent RNA helicase DDX39A                                 | 49067     | 166.43 | 27           | 11       | 5               |
| Q6PGC1    | ATP-dependent RNA helicase DHX29                                  | 153975    | 163.33 | 9            | 8        | 8               |
| Q99PU8    | ATP-dependent RNA helicase DHX30                                  | 136668    | 70.39  | 2            | 2        | 2               |

|        |                                                                      |        |        |    |    |    |
|--------|----------------------------------------------------------------------|--------|--------|----|----|----|
| P56485 | Atypical chemokine receptor 3                                        | 41636  | 113.17 | 7  | 2  | 2  |
| Q9Z2H5 | Band 4.1-like protein 1                                              | 98315  | 142.57 | 8  | 6  | 5  |
| O54962 | Barrier-to-autointegration factor                                    | 10103  | 123.12 | 47 | 4  | 4  |
| Q05793 | Basement membrane-specific heparan sulfate proteoglycan core protein | 398295 | 453.37 | 37 | 84 | 84 |
| Q8K019 | Bcl-2-associated transcription factor 1                              | 106002 | 50.43  | 4  | 2  | 2  |
| P20060 | Beta-hexosaminidase subunit beta                                     | 61116  | 57.82  | 6  | 2  | 2  |
| P98063 | Bone morphogenetic protein 1                                         | 111666 | 81.52  | 6  | 4  | 4  |
| P36895 | Bone morphogenetic protein receptor type-1A                          | 60063  | 69.6   | 7  | 2  | 2  |
| Q8K3W0 | BRISC and BRCA1-A complex member 2                                   | 43545  | 59.57  | 7  | 2  | 2  |
| P33146 | Cadherin-15                                                          | 85644  | 73.6   | 4  | 2  | 2  |
| P15116 | Cadherin-2                                                           | 99796  | 118.48 | 5  | 3  | 3  |
| Q923T9 | Calcium/calmodulin-dependent protein kinase type II subunit gamma    | 59607  | 98.25  | 15 | 5  | 4  |
| O08688 | Calpain-5                                                            | 72955  | 57.05  | 6  | 2  | 2  |
| P48758 | Carbonyl reductase [NADPH] 1                                         | 30641  | 62.17  | 13 | 3  | 2  |
| Q6ZQ08 | CCR4-NOT transcription complex subunit 1                             | 266805 | 82.1   | 2  | 4  | 4  |
| Q8VDP4 | Cell cycle and apoptosis regulator protein 2                         | 103002 | 83.8   | 7  | 3  | 3  |
| Q8BGZ4 | Cell division cycle protein 23 homolog                               | 68562  | 72.19  | 5  | 2  | 2  |
| Q99M54 | Cell division cycle-associated protein 3                             | 28708  | 48.15  | 13 | 2  | 2  |
| O54692 | Centromere/kinetochore protein zw10 homolog                          | 88063  | 149.37 | 11 | 5  | 5  |
| O88693 | Ceramide glucosyltransferase                                         | 44839  | 206.38 | 34 | 10 | 10 |
| O35454 | Chloride transport protein 6                                         | 96980  | 88.17  | 4  | 2  | 2  |
| Q8VHY0 | Chondroitin sulfate proteoglycan 4                                   | 252305 | 105.65 | 4  | 4  | 4  |
| Q6PDQ2 | Chromodomain-helicase-DNA-binding protein 4                          | 217749 | 95.95  | 2  | 3  | 3  |
| Q9EPU4 | Cleavage and polyadenylation specificity factor subunit 1            | 160818 | 106.33 | 4  | 3  | 3  |
| Q5SW19 | Clustered mitochondria protein homolog                               | 148068 | 108.81 | 9  | 7  | 7  |
| O88783 | Coagulation factor V                                                 | 247228 | 127.59 | 2  | 3  | 3  |
| Q9JIF7 | Coatomer subunit beta                                                | 107066 | 235.25 | 27 | 15 | 15 |
| P28481 | Collagen alpha-1(II) chain                                           | 141974 | 55.15  | 6  | 4  | 3  |
| Q04857 | Collagen alpha-1(VI) chain                                           | 108489 | 48.32  | 4  | 2  | 2  |
| Q60847 | Collagen alpha-1(XII) chain                                          | 340215 | 174.32 | 7  | 12 | 12 |
| P39061 | Collagen alpha-1(XVIII) chain                                        | 182171 | 107.98 | 6  | 5  | 5  |
| Q2UY11 | Collagen alpha-1(XXVIII) chain                                       | 118749 | 47.03  | 7  | 3  | 3  |

|        |                                                    |        |        |    |    |    |
|--------|----------------------------------------------------|--------|--------|----|----|----|
| Q3U962 | Collagen alpha-2(V) chain                          | 145018 | 65.46  | 3  | 3  | 3  |
| P01027 | Complement C3                                      | 186483 | 159.06 | 4  | 7  | 6  |
| P59108 | Copine-2                                           | 61036  | 73.54  | 5  | 2  | 2  |
| Q9DC53 | Copine-8                                           | 64667  | 86.98  | 9  | 4  | 4  |
| Q9QZQ8 | Core histone macro-H2A.1                           | 39735  | 166.44 | 34 | 8  | 6  |
| P45481 | CREB-binding protein                               | 265491 | 51.73  | 2  | 2  | 2  |
| Q91YT8 | CSC1-like protein 1                                | 91860  | 72.19  | 5  | 3  | 3  |
| Q5SUQ9 | CST complex subunit CTC1                           | 134028 | 62.69  | 4  | 2  | 2  |
| P97314 | Cysteine and glycine-rich protein 2                | 20926  | 81.14  | 15 | 2  | 2  |
| Q8BGE6 | Cysteine protease ATG4B                            | 44375  | 84.08  | 13 | 3  | 3  |
| Q9D1A2 | Cytosolic non-specific dipeptidase                 | 52767  | 78.34  | 4  | 2  | 2  |
| Q3V1L4 | Cytosolic purine 5'-nucleotidase                   | 64809  | 52.38  | 6  | 2  | 2  |
| A2AF47 | Dedicator of cytokinesis protein 11                | 237769 | 50.68  | 2  | 2  | 2  |
| Q9QXB9 | Developmentally-regulated GTP-binding protein 2    | 40718  | 188.43 | 29 | 8  | 8  |
| Q91ZV3 | Discoidin CUB and LCCL domain-containing protein 2 | 83774  | 86.58  | 6  | 2  | 2  |
| Q3USZ8 | Divergent protein kinase domain 2A                 | 49463  | 69.6   | 7  | 2  | 2  |
| P37913 | DNA ligase 1                                       | 102290 | 69.58  | 5  | 3  | 3  |
| P25206 | DNA replication licensing factor MCM3              | 91546  | 216.56 | 24 | 9  | 9  |
| P49717 | DNA replication licensing factor MCM4              | 96736  | 164.89 | 18 | 13 | 13 |
| P49718 | DNA replication licensing factor MCM5              | 82343  | 130.38 | 11 | 6  | 6  |
| P97311 | DNA replication licensing factor MCM6              | 92867  | 181.07 | 17 | 10 | 10 |
| Q61881 | DNA replication licensing factor MCM7              | 81211  | 267.44 | 34 | 16 | 16 |
| Q04750 | DNA topoisomerase 1                                | 90876  | 109.95 | 8  | 4  | 4  |
| Q64511 | DNA topoisomerase 2-beta                           | 181908 | 132.2  | 8  | 8  | 5  |
| P08775 | DNA-directed RNA polymerase II subunit RPB1        | 217174 | 158.83 | 5  | 7  | 7  |
| Q8CFI7 | DNA-directed RNA polymerase II subunit RPB2        | 133910 | 139.68 | 8  | 6  | 6  |
| Q9QYJ3 | DnaJ homolog subfamily B member 1                  | 38167  | 69.15  | 9  | 3  | 2  |
| Q9D832 | DnaJ homolog subfamily B member 4                  | 37782  | 66.89  | 12 | 3  | 2  |
| P51807 | Dynein light chain Tctex-type 1                    | 12483  | 50.12  | 37 | 2  | 2  |
| Q3U487 | E3 ubiquitin-protein ligase HECTD3                 | 97347  | 60.76  | 3  | 2  | 2  |
| Q8C863 | E3 ubiquitin-protein ligase Itchy                  | 98994  | 106.02 | 10 | 5  | 4  |
| Q80UY2 | E3 ubiquitin-protein ligase KCMF1                  | 41791  | 99.24  | 8  | 2  | 2  |

|        |                                                      |        |        |    |    |    |
|--------|------------------------------------------------------|--------|--------|----|----|----|
| Q8CFI0 | E3 ubiquitin-protein ligase NEDD4-like               | 115419 | 170.31 | 10 | 9  | 2  |
| Q3U2C5 | E3 ubiquitin-protein ligase RNF149                   | 42553  | 94.18  | 11 | 3  | 3  |
| E9Q555 | E3 ubiquitin-protein ligase RNF213                   | 584791 | 156.76 | 2  | 8  | 8  |
| Q8C0E3 | E3 ubiquitin-protein ligase TRIM47                   | 69912  | 231.55 | 29 | 11 | 11 |
| G5E870 | E3 ubiquitin-protein ligase TRIP12                   | 224126 | 68.41  | 2  | 3  | 3  |
| Q80TP3 | E3 ubiquitin-protein ligase UBR5                     | 308351 | 40.71  | 2  | 2  | 2  |
| Q80TA9 | Ectopic P granules protein 5 homolog                 | 290799 | 67.82  | 1  | 2  | 2  |
| Q9QXY6 | EH domain-containing protein 3                       | 60821  | 220.85 | 28 | 15 | 2  |
| P54320 | Elastin                                              | 71938  | 53.74  | 2  | 2  | 2  |
| Q8JZR6 | Electroneutral sodium bicarbonate exchanger 1        | 122421 | 60.45  | 3  | 2  | 2  |
| Q7TT37 | Elongator complex protein 1                          | 149583 | 184.24 | 10 | 8  | 8  |
| Q91WG4 | Elongator complex protein 2                          | 93093  | 74.18  | 5  | 2  | 2  |
| Q9CZX0 | Elongator complex protein 3                          | 62385  | 114.33 | 10 | 4  | 4  |
| Q99K41 | EMILIN-1                                             | 107585 | 164.84 | 12 | 7  | 7  |
| Q8K482 | EMILIN-2                                             | 117310 | 103.04 | 3  | 2  | 2  |
| Q8BHL5 | Engulfment and cell motility protein 2               | 83887  | 57.88  | 7  | 3  | 3  |
| P54754 | Ephrin type-B receptor 3                             | 109662 | 141.64 | 7  | 5  | 2  |
| P54761 | Ephrin type-B receptor 4                             | 108848 | 135.53 | 7  | 5  | 2  |
| Q8R0W0 | Epiplakin                                            | 724747 | 128.3  | 1  | 5  | 2  |
| Q9CQM2 | ER lumen protein-retaining receptor 2                | 24454  | 61.77  | 16 | 2  | 2  |
| Q91VC3 | Eukaryotic initiation factor 4A-III                  | 46840  | 195.75 | 31 | 10 | 7  |
| Q9D1M4 | Eukaryotic translation elongation factor 1 epsilon-1 | 19859  | 49.88  | 20 | 2  | 2  |
| Q9DBZ5 | Eukaryotic translation initiation factor 3 subunit K | 25087  | 95.52  | 13 | 2  | 2  |
| Q62448 | Eukaryotic translation initiation factor 4 gamma 2   | 102105 | 60.69  | 5  | 3  | 3  |
| Q8BMB3 | Eukaryotic translation initiation factor 4E type 2   | 28263  | 43.21  | 12 | 2  | 2  |
| O35382 | Exocyst complex component 4                          | 110545 | 72.54  | 3  | 2  | 2  |
| Q8BTW3 | Exosome complex component MTR3                       | 28370  | 62.84  | 15 | 2  | 2  |
| Q9CSH3 | Exosome complex exonuclease RRP44                    | 108837 | 71.09  | 6  | 3  | 3  |
| Q9CZU3 | Exosome RNA helicase MTR4                            | 117636 | 46.12  | 3  | 2  | 2  |
| Q9EPK7 | Exportin-7                                           | 123810 | 122.74 | 7  | 4  | 4  |
| Q8K007 | Extracellular sulfatase Sulf-1                       | 100923 | 87.08  | 6  | 2  | 2  |
| Q920B9 | FACT complex subunit SPT16                           | 119825 | 130.73 | 11 | 7  | 7  |

|        |                                                                     |        |        |    |    |    |
|--------|---------------------------------------------------------------------|--------|--------|----|----|----|
| Q08943 | FACT complex subunit SSRP1                                          | 80860  | 85.92  | 7  | 4  | 4  |
| Q6P9Q4 | FH1/FH2 domain-containing protein 1                                 | 129600 | 61.88  | 3  | 2  | 2  |
| Q08879 | Fibulin-1                                                           | 78033  | 68.93  | 6  | 2  | 2  |
| P37889 | Fibulin-2                                                           | 131834 | 270.79 | 27 | 20 | 20 |
| Q9R0N0 | Galactokinase                                                       | 42295  | 174.37 | 33 | 8  | 8  |
| Q07797 | Galectin-3-binding protein                                          | 64491  | 218.25 | 28 | 9  | 9  |
| Q9CWZ7 | Gamma-soluble NSF attachment protein                                | 34732  | 81.75  | 10 | 2  | 2  |
| Q921G8 | Gamma-tubulin complex component 2                                   | 103223 | 128.6  | 6  | 4  | 4  |
| P58854 | Gamma-tubulin complex component 3                                   | 103469 | 148.71 | 9  | 6  | 6  |
| Q8BKN5 | Gamma-tubulin complex component 5                                   | 117977 | 93.29  | 4  | 2  | 2  |
| Q8BX17 | Gem-associated protein 5                                            | 166591 | 57.17  | 2  | 2  | 2  |
| Q8BMQ2 | General transcription factor 3C polypeptide 4                       | 91613  | 66.7   | 4  | 2  | 2  |
| Q9Z1E4 | Glycogen [starch] synthase muscle                                   | 83927  | 136.94 | 10 | 4  | 4  |
| Q9WV60 | Glycogen synthase kinase-3 beta                                     | 46710  | 192.35 | 30 | 7  | 7  |
| O70311 | Glycylpeptide N-tetradecanoyltransferase 2                          | 60484  | 119.98 | 12 | 4  | 2  |
| Q99L27 | GMP reductase 2                                                     | 38019  | 95.36  | 7  | 2  | 2  |
| Q8BXA1 | Golgi integral membrane protein 4                                   | 76785  | 74.96  | 7  | 3  | 3  |
| O70326 | Gremlin-1                                                           | 20710  | 97.86  | 15 | 2  | 2  |
| P43029 | Growth/differentiation factor 7                                     | 47891  | 52.79  | 7  | 2  | 2  |
| Q6R0H7 | Guanine nucleotide-binding protein G(s) subunit alpha isoforms XLas | 121505 | 219.58 | 16 | 15 | 13 |
| Q8CI11 | Guanine nucleotide-binding protein-like 3                           | 60787  | 166.68 | 18 | 5  | 5  |
| Q9CY66 | H/ACA ribonucleoprotein complex subunit 1                           | 23474  | 54.15  | 11 | 3  | 3  |
| Q99M31 | Heat shock 70 kDa protein 14                                        | 54650  | 68.67  | 8  | 2  | 2  |
| P48722 | Heat shock 70 kDa protein 4L                                        | 94382  | 103.58 | 5  | 3  | 2  |
| P17156 | Heat shock-related 70 kDa protein 2                                 | 69642  | 251.61 | 24 | 13 | 3  |
| Q7TN16 | Hedgehog-interacting protein                                        | 78513  | 49.94  | 4  | 2  | 2  |
| P01942 | Hemoglobin subunit alpha                                            | 15085  | 96.78  | 17 | 2  | 2  |
| Q3TEA8 | Heterochromatin protein 1-binding protein 3                         | 60867  | 115.77 | 14 | 4  | 4  |
| Q60668 | Heterogeneous nuclear ribonucleoprotein D0                          | 38354  | 121.67 | 16 | 3  | 3  |
| Q921F4 | Heterogeneous nuclear ribonucleoprotein L-like                      | 64125  | 77.56  | 9  | 3  | 3  |
| Q09143 | High affinity cationic amino acid transporter 1                     | 67092  | 136.08 | 10 | 3  | 3  |
| O09106 | Histone deacetylase 1                                               | 55075  | 99.75  | 12 | 3  | 2  |

|        |                                                                           |        |        |    |    |    |
|--------|---------------------------------------------------------------------------|--------|--------|----|----|----|
| O88895 | Histone deacetylase 3                                                     | 48364  | 39.26  | 7  | 2  | 2  |
| P43274 | Histone H1.4                                                              | 21977  | 199.12 | 25 | 9  | 3  |
| Q3THW5 | Histone H2A.V                                                             | 13509  | 205.61 | 54 | 7  | 5  |
| P0C0S6 | Histone H2A.Z                                                             | 13553  | 205.61 | 54 | 7  | 5  |
| Q6ZWY9 | Histone H2B type 1-C/E/G                                                  | 13906  | 165.03 | 29 | 5  | 5  |
| P10853 | Histone H2B type 1-F/J/L                                                  | 13936  | 165.03 | 29 | 5  | 5  |
| Q64478 | Histone H2B type 1-H                                                      | 13920  | 165.03 | 29 | 5  | 5  |
| Q8CGP1 | Histone H2B type 1-K                                                      | 13920  | 165.03 | 29 | 5  | 5  |
| P10854 | Histone H2B type 1-M                                                      | 13936  | 165.03 | 29 | 5  | 5  |
| Q8CGP2 | Histone H2B type 1-P                                                      | 13992  | 165.03 | 29 | 5  | 5  |
| Q64525 | Histone H2B type 2-B                                                      | 13920  | 165.03 | 29 | 5  | 5  |
| Q60960 | Importin subunit alpha-5                                                  | 60183  | 50.29  | 7  | 2  | 2  |
| Q8K2V6 | Importin-11                                                               | 112416 | 128.93 | 7  | 4  | 4  |
| Q8BKG3 | Inactive tyrosine-protein kinase 7                                        | 117532 | 58.41  | 3  | 2  | 2  |
| O89051 | Integral membrane protein 2B                                              | 30260  | 137.73 | 15 | 4  | 4  |
| Q6P4S8 | Integrator complex subunit 1                                              | 245165 | 84.79  | 2  | 2  | 2  |
| Q80UK8 | Integrator complex subunit 2                                              | 133515 | 79.44  | 4  | 2  | 2  |
| Q7TPD0 | Integrator complex subunit 3                                              | 117938 | 177.78 | 3  | 5  | 5  |
| Q62470 | Integrin alpha-3                                                          | 116745 | 293.5  | 36 | 23 | 23 |
| O55222 | Integrin-linked protein kinase                                            | 51373  | 148.78 | 26 | 8  | 8  |
| Q61703 | Inter-alpha-trypsin inhibitor heavy chain H2                              | 105928 | 130.17 | 5  | 5  | 5  |
| Q61704 | Inter-alpha-trypsin inhibitor heavy chain H3                              | 99358  | 121.64 | 5  | 5  | 5  |
| Q00560 | Interleukin-6 receptor subunit beta                                       | 102451 | 158.47 | 10 | 5  | 5  |
| Q9QWL7 | Keratin type I cytoskeletal 17                                            | 48162  | 157.34 | 22 | 10 | 2  |
| Q6IFZ6 | Keratin type II cytoskeletal 1b                                           | 61359  | 128.51 | 9  | 5  | 2  |
| P50446 | Keratin type II cytoskeletal 6A                                           | 59335  | 135.97 | 13 | 7  | 2  |
| Q8VED5 | Keratin type II cytoskeletal 79                                           | 57552  | 107.43 | 12 | 5  | 2  |
| Q8K274 | Ketosamine-3-kinase                                                       | 34468  | 119.81 | 7  | 2  | 2  |
| Q60749 | KH domain-containing RNA-binding signal transduction-associated protein 1 | 48371  | 90.9   | 8  | 2  | 2  |
| Q8C3Y4 | Kinetochore-associated protein 1                                          | 250356 | 49.68  | 2  | 3  | 3  |
| Q8BGA5 | KRR1 small subunit processome component homolog                           | 43538  | 54.26  | 7  | 2  | 2  |
| Q61033 | Lamina-associated polypeptide 2 isoforms alpha/zeta                       | 75168  | 99.13  | 8  | 3  | 3  |



|        |                                                                            |        |        |    |    |    |
|--------|----------------------------------------------------------------------------|--------|--------|----|----|----|
| P02468 | Laminin subunit gamma-1                                                    | 177298 | 265.54 | 22 | 20 | 20 |
| Q6ZQ58 | La-related protein 1                                                       | 121125 | 97.32  | 6  | 3  | 3  |
| Q8BWW4 | La-related protein 4                                                       | 79763  | 57.09  | 3  | 2  | 2  |
| O89013 | Leptin receptor gene-related protein                                       | 14316  | 67.7   | 11 | 2  | 2  |
| Q9CXD9 | Leucine-rich repeat-containing protein 17                                  | 51852  | 118.69 | 12 | 4  | 4  |
| P11152 | Lipoprotein lipase                                                         | 53109  | 149.06 | 16 | 5  | 5  |
| P16125 | L-lactate dehydrogenase B chain                                            | 36572  | 98.39  | 10 | 3  | 2  |
| P35951 | Low-density lipoprotein receptor                                           | 94947  | 83.74  | 5  | 3  | 3  |
| P51885 | Lumican                                                                    | 38265  | 112.27 | 13 | 4  | 4  |
| P70699 | Lysosomal alpha-glucosidase                                                | 106248 | 78.68  | 4  | 2  | 2  |
| P17047 | Lysosome-associated membrane glycoprotein 2                                | 45681  | 92.42  | 9  | 4  | 4  |
| P58022 | Lysyl oxidase homolog 2                                                    | 87003  | 121.17 | 6  | 3  | 3  |
| A2AJI0 | MAP7 domain-containing protein 1                                           | 93276  | 128.07 | 9  | 4  | 4  |
| Q8K310 | Matrin-3                                                                   | 94630  | 86.88  | 6  | 3  | 3  |
| Q9CQ39 | Mediator of RNA polymerase II transcription subunit 21                     | 15588  | 52.01  | 41 | 3  | 3  |
| Q80YQ2 | Mediator of RNA polymerase II transcription subunit 23                     | 156087 | 90.92  | 6  | 4  | 4  |
| Q9QYH6 | Melanoma-associated antigen D1                                             | 85670  | 79.95  | 4  | 2  | 2  |
| Q8K4B0 | Metastasis-associated protein MTA1                                         | 80798  | 105.83 | 7  | 4  | 3  |
| Q99LB6 | Methionine adenosyltransferase 2 subunit beta                              | 37393  | 75.93  | 11 | 2  | 2  |
| Q9Z2D8 | Methyl-CpG-binding domain protein 3                                        | 32168  | 52.32  | 6  | 2  | 2  |
| Q62000 | Mimecan                                                                    | 34012  | 131.85 | 18 | 4  | 4  |
| Q9JM52 | Misshapen-like kinase 1                                                    | 147294 | 110.46 | 4  | 5  | 2  |
| Q63844 | Mitogen-activated protein kinase 3                                         | 43067  | 143.17 | 23 | 6  | 3  |
| Q9D071 | MMS19 nucleotide excision repair protein homolog                           | 113089 | 72.97  | 5  | 3  | 3  |
| Q9D0I8 | mRNA turnover protein 4 homolog                                            | 27546  | 84.41  | 17 | 3  | 3  |
| P21447 | Multidrug resistance protein 1A                                            | 140646 | 145.18 | 4  | 2  | 2  |
| Q9R0E1 | Multifunctional procollagen lysine hydroxylase and glycosyltransferase LH3 | 84922  | 80.69  | 8  | 4  | 4  |
| Q78HU3 | Multivesicular body subunit 12A                                            | 28705  | 104.26 | 12 | 2  | 2  |
| Q6KAU4 | Multivesicular body subunit 12B                                            | 35411  | 162.79 | 26 | 4  | 4  |
| P28665 | Murinoglobulin-1                                                           | 165297 | 90.38  | 3  | 4  | 2  |
| P28666 | Murinoglobulin-2                                                           | 162381 | 90.38  | 3  | 4  | 2  |
| Q6ZPE2 | Myotubularin-related protein 5                                             | 208691 | 82.55  | 3  | 3  | 3  |

|        |                                                        |        |        |    |    |    |
|--------|--------------------------------------------------------|--------|--------|----|----|----|
| Q9DBH0 | NEDD4-like E3 ubiquitin-protein ligase WWP2            | 98761  | 105.32 | 5  | 3  | 3  |
| Q8K1S3 | Netrin receptor UNC5B                                  | 103739 | 102.58 | 7  | 4  | 4  |
| O09118 | Netrin-1                                               | 67810  | 153.78 | 16 | 6  | 6  |
| Q04690 | Neurofibromin                                          | 319595 | 67     | 1  | 2  | 2  |
| Q9D0T1 | NHP2-like protein 1                                    | 14174  | 66.1   | 31 | 2  | 2  |
| O88322 | Nidogen-2                                              | 153913 | 274.7  | 26 | 22 | 21 |
| Q80TM9 | Nischarin                                              | 175011 | 161.2  | 5  | 5  | 5  |
| Q99ME9 | Nucleolar GTP-binding protein 1                        | 74113  | 80.87  | 5  | 3  | 3  |
| Q9CPT5 | Nucleolar protein 16                                   | 21139  | 100.11 | 19 | 3  | 3  |
| Q9D6Z1 | Nucleolar protein 56                                   | 64464  | 232.24 | 29 | 13 | 13 |
| Q3V1G4 | Olfactomedin-like protein 2B                           | 83503  | 124.59 | 10 | 5  | 5  |
| B2RUR8 | OTU domain-containing protein 7B                       | 91984  | 78.2   | 5  | 2  | 2  |
| S4R1M9 | Oxysterol-binding protein-related protein 10           | 83856  | 48.64  | 3  | 2  | 2  |
| Q8CI95 | Oxysterol-binding protein-related protein 11           | 83629  | 48.64  | 3  | 2  | 2  |
| Q9DCE5 | p21-activated protein kinase-interacting protein 1     | 42116  | 122.51 | 16 | 4  | 4  |
| P00688 | Pancreatic alpha-amylase                               | 57318  | 37.94  | 4  | 2  | 2  |
| A2AR02 | Peptidyl-prolyl cis-trans isomerase G                  | 88325  | 66.41  | 2  | 2  | 2  |
| Q9R0L6 | Pericentriolar material 1 protein                      | 228845 | 80.73  | 1  | 2  | 2  |
| Q99LL5 | Periodic tryptophan protein 1 homolog                  | 55587  | 74.28  | 7  | 2  | 2  |
| Q3UQ28 | Peroxidasin homolog                                    | 165102 | 191.45 | 11 | 10 | 10 |
| P83870 | PHD finger-like domain-containing protein 5A           | 12405  | 79.66  | 26 | 2  | 2  |
| P70182 | Phosphatidylinositol 4-phosphate 5-kinase type-1 alpha | 60485  | 64.1   | 6  | 2  | 2  |
| Q8R2H9 | Phosphoethanolamine/phosphocholine phosphatase         | 29911  | 50.29  | 13 | 2  | 2  |
| P55065 | Phospholipid transfer protein                          | 54453  | 131.44 | 18 | 6  | 6  |
| P97298 | Pigment epithelium-derived factor                      | 46234  | 152.33 | 14 | 4  | 4  |
| Q68FH0 | Plakophilin-4                                          | 131551 | 36.43  | 2  | 2  | 2  |
| P20918 | Plasminogen                                            | 90808  | 39.12  | 2  | 2  | 2  |
| Q6PB93 | Polypeptide N-acetylgalactosaminyltransferase 2        | 64515  | 48.21  | 5  | 2  | 2  |
| Q61838 | Pregnancy zone protein                                 | 165852 | 87.77  | 3  | 4  | 2  |
| Q9R1C7 | Pre-mRNA-processing factor 40 homolog A                | 108481 | 54.81  | 3  | 2  | 2  |
| Q5SWD9 | Pre-rRNA-processing protein TSR1 homolog               | 92105  | 117.93 | 9  | 4  | 4  |
| Q501J6 | Probable ATP-dependent RNA helicase DDX17              | 72400  | 208.55 | 31 | 17 | 8  |

|        |                                                               |        |        |    |    |    |
|--------|---------------------------------------------------------------|--------|--------|----|----|----|
| Q9JJY4 | Probable ATP-dependent RNA helicase DDX20                     | 91710  | 168.74 | 11 | 5  | 5  |
| Q569Z5 | Probable ATP-dependent RNA helicase DDX46                     | 117448 | 70.3   | 3  | 3  | 3  |
| Q8BWU5 | Probable tRNA N6-adenosine threonylcarbamoyltransferase       | 36301  | 98.12  | 14 | 2  | 2  |
| Q61398 | Procollagen C-endopeptidase enhancer 1                        | 50168  | 220.34 | 49 | 14 | 14 |
| Q8R4W6 | Procollagen C-endopeptidase enhancer 2                        | 45408  | 79.43  | 7  | 2  | 2  |
| Q9R0E2 | Procollagen-lysine 2-oxoglutarate 5-dioxygenase 1             | 83595  | 94.18  | 7  | 3  | 3  |
| Q60716 | Prolyl 4-hydroxylase subunit alpha-2                          | 61002  | 139.84 | 23 | 7  | 7  |
| Q9R0Q7 | Prostaglandin E synthase 3                                    | 18721  | 138.42 | 26 | 3  | 3  |
| Q5SSW2 | Proteasome activator complex subunit 4                        | 211195 | 99.24  | 4  | 5  | 5  |
| Q9JK23 | Proteasome assembly chaperone 1                               | 33104  | 58.95  | 10 | 2  | 2  |
| P49722 | Proteasome subunit alpha type-2                               | 25927  | 216.19 | 43 | 7  | 7  |
| O55234 | Proteasome subunit beta type-5                                | 28532  | 223.61 | 50 | 11 | 11 |
| Q91VH6 | Protein MEMO1                                                 | 33692  | 129.96 | 29 | 5  | 5  |
| P33215 | Protein NEDD1                                                 | 71292  | 97.2   | 9  | 3  | 3  |
| Q7TSC1 | Protein PRRC2A                                                | 229200 | 82.05  | 4  | 4  | 4  |
| Q0VGY8 | Protein TANC1                                                 | 200803 | 88.92  | 2  | 2  | 2  |
| P19221 | Prothrombin                                                   | 70269  | 187.94 | 9  | 5  | 5  |
| Q91XY4 | Protocadherin gamma-A4                                        | 100358 | 45.89  | 3  | 2  | 2  |
| Q8BKS9 | Pumilio homolog 3                                             | 72800  | 124.54 | 17 | 6  | 6  |
| Q68FL4 | Putative adenosylhomocysteinase 3                             | 66899  | 72.7   | 5  | 4  | 2  |
| Q99K01 | Pyridoxal-dependent decarboxylase domain-containing protein 1 | 87336  | 45.49  | 4  | 2  | 2  |
| P53657 | Pyruvate kinase PKLR                                          | 62309  | 70.25  | 7  | 3  | 2  |
| P52480 | Pyruvate kinase PKM                                           | 57845  | 369.93 | 59 | 30 | 29 |
| P69566 | Ran-binding protein 9                                         | 71012  | 69.77  | 6  | 2  | 2  |
| Q60790 | Ras GTPase-activating protein 3                               | 95987  | 80.86  | 7  | 4  | 4  |
| F6SEU4 | Ras/Rap GTPase-activating protein SynGAP                      | 148238 | 41.66  | 4  | 2  | 2  |
| P35288 | Ras-related protein Rab-23                                    | 26678  | 79.2   | 12 | 3  | 3  |
| Q921E2 | Ras-related protein Rab-31                                    | 21331  | 75.53  | 13 | 2  | 2  |
| Q64008 | Ras-related protein Rab-34                                    | 29101  | 142.28 | 27 | 6  | 5  |
| Q8BU31 | Ras-related protein Rap-2c                                    | 20745  | 151.35 | 40 | 5  | 2  |
| P35822 | Receptor-type tyrosine-protein phosphatase kappa              | 164185 | 81.73  | 4  | 4  | 4  |
| B0V2N1 | Receptor-type tyrosine-protein phosphatase S                  | 211902 | 89.73  | 2  | 2  | 2  |

|        |                                                                                   |        |        |    |    |    |
|--------|-----------------------------------------------------------------------------------|--------|--------|----|----|----|
| Q8VE37 | Regulator of chromosome condensation                                              | 44931  | 198.28 | 23 | 6  | 6  |
| Q9EPU0 | Regulator of nonsense transcripts 1                                               | 123967 | 184.22 | 15 | 12 | 12 |
| Q8VEE4 | Replication protein A 70 kDa DNA-binding subunit                                  | 69037  | 111.93 | 20 | 9  | 9  |
| Q61210 | Rho guanine nucleotide exchange factor 1                                          | 102804 | 139.56 | 8  | 5  | 5  |
| Q91VI7 | Ribonuclease inhibitor                                                            | 49817  | 278.13 | 50 | 14 | 14 |
| O88796 | Ribonuclease P protein subunit p30                                                | 29473  | 141.75 | 29 | 5  | 5  |
| P56183 | Ribosomal RNA processing protein 1 homolog A                                      | 54777  | 56.34  | 9  | 2  | 2  |
| P97452 | Ribosome biogenesis protein BOP1                                                  | 82546  | 145.15 | 16 | 5  | 5  |
| Q9JJA4 | Ribosome biogenesis protein WDR12                                                 | 47347  | 111.22 | 10 | 2  | 2  |
| Q9JJ80 | Ribosome production factor 2 homolog                                              | 35364  | 42.48  | 8  | 2  | 2  |
| Q8K224 | RNA cytidine acetyltransferase                                                    | 115418 | 103.37 | 4  | 3  | 3  |
| B2RY56 | RNA-binding protein 25                                                            | 99552  | 95.07  | 7  | 5  | 5  |
| Q8C5L7 | RNA-binding protein 34                                                            | 41326  | 134.46 | 17 | 4  | 4  |
| Q64012 | RNA-binding protein Raly                                                          | 33188  | 153.09 | 21 | 4  | 4  |
| P35550 | rRNA 2'-O-methyltransferase fibrillarin                                           | 34307  | 190.96 | 46 | 9  | 6  |
| Q6P5B0 | RRP12-like protein                                                                | 143131 | 105.08 | 3  | 2  | 2  |
| Q80SW1 | S-adenosylhomocysteine hydrolase-like protein 1                                   | 58952  | 72.7   | 6  | 4  | 2  |
| Q3THS6 | S-adenosylmethionine synthase isoform type-2                                      | 43689  | 49.74  | 10 | 2  | 2  |
| Q8K021 | Secretory carrier-associated membrane protein 1                                   | 38029  | 37.54  | 10 | 2  | 2  |
| Q62177 | Semaphorin-3B                                                                     | 82700  | 177.73 | 20 | 9  | 9  |
| Q9QZI9 | Serine incorporator 3                                                             | 52623  | 81.54  | 5  | 3  | 3  |
| Q8BHJ6 | Serine incorporator 5                                                             | 51831  | 164.43 | 13 | 4  | 4  |
| Q9D6X6 | Serine protease 23                                                                | 43072  | 155.91 | 16 | 4  | 4  |
| Q9R118 | Serine protease HTRA1                                                             | 51214  | 276.35 | 39 | 16 | 16 |
| O55098 | Serine/threonine-protein kinase 10                                                | 111906 | 40.65  | 3  | 2  | 2  |
| Q7TT50 | Serine/threonine-protein kinase MRCK beta                                         | 194751 | 104.08 | 3  | 3  | 3  |
| Q9JLN9 | Serine/threonine-protein kinase mTOR                                              | 288788 | 131.38 | 4  | 7  | 7  |
| Q61136 | Serine/threonine-protein kinase PRP4 homolog                                      | 116976 | 77.33  | 3  | 2  | 2  |
| Q61151 | Serine/threonine-protein phosphatase 2A 56 kDa regulatory subunit epsilon isoform | 54714  | 50.65  | 6  | 2  | 2  |
| Q9CQR6 | Serine/threonine-protein phosphatase 6 catalytic subunit                          | 35159  | 46.99  | 10 | 2  | 2  |
| Q99MR6 | Serrate RNA effector molecule homolog                                             | 100452 | 99.86  | 4  | 3  | 3  |
| P07724 | Serum albumin                                                                     | 68693  | 150.13 | 7  | 3  | 3  |

|        |                                                                                               |        |        |    |    |    |
|--------|-----------------------------------------------------------------------------------------------|--------|--------|----|----|----|
| Q91X20 | Set1/Ash2 histone methyltransferase complex subunit ASH2                                      | 68250  | 86.98  | 5  | 2  | 2  |
| Q9R0P3 | S-formylglutathione hydrolase                                                                 | 31320  | 265.07 | 61 | 9  | 9  |
| O89032 | SH3 and PX domain-containing protein 2A                                                       | 124201 | 49.38  | 2  | 2  | 2  |
| Q8CIF6 | SID1 transmembrane family member 2                                                            | 94501  | 51.38  | 5  | 2  | 2  |
| Q3TD49 | Signal peptide peptidase-like 2B                                                              | 63824  | 84.1   | 7  | 2  | 2  |
| Q9D7A6 | Signal recognition particle 19 kDa protein                                                    | 16191  | 91.47  | 27 | 2  | 2  |
| Q9R1B9 | Slit homolog 2 protein                                                                        | 168782 | 54.54  | 2  | 2  | 2  |
| P27048 | Small nuclear ribonucleoprotein-associated protein B                                          | 23656  | 69.8   | 21 | 2  | 2  |
| Q5XG71 | Small subunit processome component 20 homolog                                                 | 317744 | 78.69  | 2  | 3  | 3  |
| Q9JKZ2 | Sodium/myo-inositol cotransporter                                                             | 79583  | 54.07  | 4  | 2  | 2  |
| Q61609 | Sodium-dependent phosphate transporter 1                                                      | 74153  | 92.47  | 8  | 4  | 4  |
| Q8BV57 | Soluble scavenger receptor cysteine-rich domain-containing protein SSC5D                      | 144636 | 98.41  | 3  | 3  | 3  |
| Q9EPR4 | Solute carrier family 23 member 2                                                             | 70049  | 135.76 | 8  | 3  | 3  |
| Q8VE96 | Solute carrier family 35 member F6                                                            | 40978  | 70.63  | 11 | 2  | 2  |
| Q8BVL3 | Sorting nexin-17                                                                              | 52797  | 62.51  | 7  | 2  | 2  |
| Q8QZY9 | Splicing factor 3B subunit 4                                                                  | 44356  | 80.62  | 9  | 2  | 2  |
| Q923D4 | Splicing factor 3B subunit 5                                                                  | 10119  | 68.68  | 33 | 2  | 2  |
| P59708 | Splicing factor 3B subunit 6                                                                  | 14585  | 103.43 | 32 | 3  | 3  |
| O70551 | SRSF protein kinase 1                                                                         | 73089  | 127.78 | 12 | 5  | 5  |
| Q8CG48 | Structural maintenance of chromosomes protein 2                                               | 134239 | 64.74  | 4  | 3  | 3  |
| Q8CG47 | Structural maintenance of chromosomes protein 4                                               | 146894 | 83.13  | 4  | 3  | 3  |
| P70279 | Surfeit locus protein 6                                                                       | 41235  | 53.84  | 6  | 2  | 2  |
| P97801 | Survival motor neuron protein                                                                 | 31254  | 48.2   | 15 | 2  | 2  |
| P97496 | SWI/SNF complex subunit SMARCC1                                                               | 122890 | 118.05 | 9  | 6  | 4  |
| O54941 | SWI/SNF-related matrix-associated actin-dependent regulator of chromatin subfamily E member 1 | 46638  | 66.12  | 10 | 3  | 3  |
| Q9EQT6 | Synaptotagmin-13                                                                              | 46870  | 116.9  | 22 | 4  | 4  |
| O88746 | Target of Myb protein 1                                                                       | 54325  | 113.88 | 17 | 4  | 4  |
| P97499 | Telomerase protein component 1                                                                | 291458 | 130.18 | 7  | 10 | 10 |
| Q80YX1 | Tenascin                                                                                      | 231805 | 338.23 | 26 | 37 | 37 |
| Q8CGB6 | Tensin-2                                                                                      | 152012 | 112.76 | 5  | 4  | 3  |
| Q3URQ0 | Testis-expressed protein 10                                                                   | 105209 | 89.58  | 5  | 3  | 3  |
| F7BWT7 | Tetraspanin-15                                                                                | 33071  | 113.42 | 15 | 3  | 3  |

|        |                                                                |        |        |    |    |   |
|--------|----------------------------------------------------------------|--------|--------|----|----|---|
| Q9QY33 | Tetraspanin-3                                                  | 28049  | 68.36  | 6  | 2  | 2 |
| Q9DCK3 | Tetraspanin-4                                                  | 26054  | 146.69 | 20 | 2  | 2 |
| B1AZI6 | THO complex subunit 2                                          | 182772 | 42.76  | 3  | 2  | 2 |
| Q9D0R2 | Threonine--tRNA ligase cytoplasmic                             | 83356  | 120.99 | 12 | 6  | 6 |
| P35441 | Thrombospondin-1                                               | 129647 | 123.8  | 9  | 8  | 7 |
| Q03350 | Thrombospondin-2                                               | 129882 | 134.72 | 5  | 5  | 4 |
| Q9QZ06 | Toll-interacting protein                                       | 30345  | 91.89  | 10 | 2  | 2 |
| O55201 | Transcription elongation factor SPT5                           | 120664 | 84.05  | 3  | 2  | 2 |
| Q6PFR5 | Transformer-2 protein homolog alpha                            | 32316  | 48.47  | 10 | 2  | 2 |
| P62996 | Transformer-2 protein homolog beta                             | 33666  | 159.68 | 24 | 5  | 5 |
| Q62219 | Transforming growth factor beta-1-induced transcript 1 protein | 50101  | 49.2   | 5  | 2  | 2 |
| Q8BGN6 | Transmembrane gamma-carboxyglutamic acid protein 4             | 25401  | 109.42 | 18 | 2  | 2 |
| Q8R138 | Transmembrane protein 119                                      | 29401  | 63     | 15 | 2  | 2 |
| Q9QY73 | Transmembrane protein 59                                       | 36314  | 122.74 | 8  | 2  | 2 |
| Q8C708 | Transmembrane protein C16orf54 homolog                         | 24532  | 64.78  | 14 | 2  | 2 |
| Q6P2B1 | Transportin-3                                                  | 104170 | 69.22  | 4  | 2  | 2 |
| Q99PP9 | Tripartite motif-containing protein 16                         | 62943  | 75.39  | 6  | 2  | 2 |
| Q1HFZ0 | tRNA (cytosine(34)-C(5))-methyltransferase                     | 85452  | 71.08  | 4  | 2  | 2 |
| P32921 | Tryptophan--tRNA ligase cytoplasmic                            | 54358  | 172.16 | 27 | 9  | 9 |
| A2AQ07 | Tubulin beta-1 chain                                           | 50441  | 169.65 | 17 | 9  | 3 |
| Q7TMM9 | Tubulin beta-2A chain                                          | 49907  | 346.94 | 75 | 32 | 2 |
| Q9CR75 | Tumor necrosis factor receptor superfamily member 12A          | 13641  | 134.68 | 33 | 5  | 5 |
| Q3TWL2 | Type 1 phosphatidylinositol 4 5-bisphosphate 4-phosphatase     | 30047  | 53.3   | 8  | 2  | 2 |
| Q9CZX7 | Type 2 phosphatidylinositol 4 5-bisphosphate 4-phosphatase     | 28038  | 226.41 | 44 | 8  | 8 |
| P39688 | Tyrosine-protein kinase Fyn                                    | 60675  | 108.34 | 13 | 6  | 2 |
| P52332 | Tyrosine-protein kinase JAK1                                   | 133367 | 75.67  | 4  | 3  | 3 |
| Q00993 | Tyrosine-protein kinase receptor UFO                           | 98191  | 85     | 4  | 2  | 2 |
| Q04736 | Tyrosine-protein kinase Yes                                    | 60630  | 109.24 | 17 | 7  | 3 |
| Q8C7V3 | U3 small nucleolar RNA-associated protein 15 homolog           | 59375  | 86.85  | 11 | 3  | 3 |
| Q8R2N2 | U3 small nucleolar RNA-associated protein 4 homolog            | 76909  | 47.68  | 5  | 2  | 2 |
| Q8CCF0 | U4/U6 small nuclear ribonucleoprotein Prp31                    | 55430  | 45.59  | 8  | 2  | 2 |
| Q9DAW6 | U4/U6 small nuclear ribonucleoprotein Prp4                     | 58370  | 91.46  | 11 | 4  | 4 |

|        |                                                                                  |        |        |    |    |    |
|--------|----------------------------------------------------------------------------------|--------|--------|----|----|----|
| Q3TIX9 | U4/U6.U5 tri-snRNP-associated protein 2                                          | 65146  | 74.82  | 6  | 2  | 2  |
| Q8R5H1 | Ubiquitin carboxyl-terminal hydrolase 15                                         | 112325 | 59.01  | 5  | 4  | 4  |
| Q6A4J8 | Ubiquitin carboxyl-terminal hydrolase 7                                          | 128475 | 76.03  | 3  | 2  | 2  |
| Q9ES00 | Ubiquitin conjugation factor E4 B                                                | 133317 | 71.64  | 2  | 2  | 2  |
| Q91WB7 | Ubiquitin domain-containing protein 1                                            | 25985  | 51.88  | 21 | 2  | 2  |
| Q8CGY8 | UDP-N-acetylglucosamine--peptide N-acetylglucosaminyltransferase 110 kDa subunit | 116952 | 89.14  | 7  | 5  | 5  |
| Q9CXL3 | Uncharacterized protein C7orf50 homolog                                          | 22168  | 83.66  | 22 | 2  | 2  |
| E9Q634 | Unconventional myosin-Ie                                                         | 126818 | 148.94 | 9  | 6  | 5  |
| Q99104 | Unconventional myosin-Va                                                         | 215536 | 100.21 | 2  | 3  | 3  |
| Q9JMH9 | Unconventional myosin-XVIIIa                                                     | 232753 | 59.2   | 2  | 3  | 3  |
| P54728 | UV excision repair protein RAD23 homolog B                                       | 43513  | 85.78  | 9  | 2  | 2  |
| Q8R0J7 | Vacuolar protein sorting-associated protein 37B                                  | 31056  | 190.8  | 36 | 6  | 6  |
| Q8R105 | Vacuolar protein sorting-associated protein 37C                                  | 38453  | 126.59 | 14 | 3  | 3  |
| P46467 | Vacuolar protein sorting-associated protein 4B                                   | 49419  | 165.1  | 23 | 7  | 7  |
| Q9CQ80 | Vacuolar protein-sorting-associated protein 25                                   | 20748  | 80.34  | 23 | 4  | 4  |
| Q62059 | Versican core protein                                                            | 366788 | 243.81 | 7  | 16 | 16 |
| P70280 | Vesicle-associated membrane protein 7                                            | 24967  | 79.16  | 22 | 3  | 3  |
| P63082 | V-type proton ATPase 16 kDa proteolipid subunit                                  | 15808  | 130.57 | 54 | 3  | 3  |
| Q9CR51 | V-type proton ATPase subunit G 1                                                 | 13724  | 152.11 | 26 | 3  | 3  |
| Q8K1X1 | WD repeat-containing protein 11                                                  | 135937 | 80.41  | 5  | 3  | 3  |
| Q8C6G8 | WD repeat-containing protein 26                                                  | 70544  | 60.43  | 5  | 2  | 2  |
| Q6ZQL4 | WD repeat-containing protein 43                                                  | 75381  | 82.57  | 7  | 2  | 2  |
| Q99ME2 | WD repeat-containing protein 6                                                   | 121898 | 40.23  | 5  | 2  | 2  |
| Q3U821 | WD repeat-containing protein 75                                                  | 94037  | 71.37  | 4  | 2  | 2  |
| Q8BFQ4 | WD repeat-containing protein 82                                                  | 35079  | 119.64 | 11 | 2  | 2  |
