# Supplementary material for: Physiactisome: A New Nanovesicle Drug Containing Heat Shock Protein 60 for Treating Muscle Wasting and Cachexia
Source: Cells. 2022 Apr 21;11(9):1406. doi: 10.3390/cells11091406 (PMC9100106; doi:10.3390/cells11091406)
Supplement: Supplementary file 1 [file cells-11-01406-s001.zip]

Archive with 5 entries (5 files):
- Supporting Information Figure S1.tiff
- Supporting Information Figure S2.tif
- Supporting_Information_Materials and Methods_Cells_Rev 2.pdf
- Supporting_Information_Proteomic analysis.xlsx
- Supporting_Information_Table S1-S4_10_2_2022.pdf
