# Supplementary material for: Physiactisome: A New Nanovesicle Drug Containing Heat Shock Protein 60 for Treating Muscle Wasting and Cachexia
Source: Cells. 2022 Apr 21;11(9):1406. doi: 10.3390/cells11091406 (PMC9100106; doi:10.3390/cells11091406)
Supplement: Supplementary file 1 [file cells-11-01406-s001.zip › Supporting_Information_Proteomic analysis.xlsx]

## Sheet: Details Differential Proteins
Accession	Description	Significance	Coverage (%)	#Peptides	#Unique	PTM	EVS1 Area	EVS2 Area	EVS3 Area	EXO1 Area	EXO2 Area	EXO3 Area	EVS1 Area (top-3 peptides)	EVS2 Area (top-3 peptides)	EVS3 Area (top-3 peptides)	EXO1 Area (top-3 peptides)	EXO2 Area (top-3 peptides)	EXO3 Area (top-3 peptides)	Sample Profile (Ratio)	Group 1 Area	Group 2 Area	Group 1 Area (top-3 peptides)	Group 2 Area (top-3 peptides)	Group Profile (Ratio)	Ratio EVS:EXO	P value	Avg. Mass
B2RQC6	CAD protein	200	2	4	4	Pyro-glu from Q	617000	762000	1060000	3460000	3940000	3580000	478000	629000	921000	3460000	3510000	3270000	1.00:1.32:1.93:7.24:7.34:6.84	811000	3780000	676000	3410000	1.00:5.04	0.198413		243236
E9PYK3	Protein mono-ADP-ribosyltransferase PARP4	151.76	2	2	2		472000	615000	475000	3820000	3090000	3710000	472000	615000	475000	3820000	3090000	3710000	1.00:1.30:1.01:8.09:6.55:7.86	521000	3540000	521000	3540000	1.00:6.80	0.147059		216131
G5E829	Plasma membrane calcium-transporting ATPase 1	122.13	17	14	7	Carbamidomethylation	28800000	24700000	26300000	9830000	10300000	9530000	17600000	15600000	17800000	6160000	6120000	6540000	1.00:0.89:1.01:0.35:0.35:0.37	26600000	10100000	17000000	6270000	1.00:0.37	2.7027		134747
O08539	Myc box-dependent-interacting protein 1	200	12	4	4		24500000	21900000	21600000	8680000	6300000	5060000	22300000	19900000	19300000	7960000	5780000	4310000	1.00:0.89:0.87:0.36:0.26:0.19	22700000	7030000	20500000	6360000	1.00:0.31	3.22581		64470
O08709	Peroxiredoxin-6	200	38	6	6	Carbamidomethylation; Deamidation (NQ)	27500000	23600000	25900000	7780000	8770000	6910000	20100000	19100000	21600000	6130000	6910000	4770000	1.00:0.95:1.07:0.30:0.34:0.24	25700000	7820000	20300000	5940000	1.00:0.29	3.44828		24871
O08810	116 kDa U5 small nuclear ribonucleoprotein component	200	9	6	5		3100000	2960000	2990000	10600000	12100000	13700000	2530000	2370000	2130000	9670000	8940000	11000000	1.00:0.93:0.84:3.82:3.53:4.34	3070000	12800000	2370000	9870000	1.00:4.16	0.240385		109361
O08992	Syntenin-1	200	39	6	6	Deamidation (NQ)	16100000	14800000	15800000	236000000	212000000	236000000	9930000	9270000	9780000	160000000	157000000	164000000	1.00:0.93:0.99:16.11:15.83:16.53	15600000	228000000	9660000	160000000	1.00:16.60	0.060241		32379
O09117	Synaptophysin-like protein 1	115.54	13	2	2	Carbamidomethylation; Oxidation (M)	12800000	10900000	11100000	4530000	4060000	4610000	12800000	10900000	11100000	4530000	4060000	4610000	1.00:0.85:0.87:0.35:0.32:0.36	11600000	4400000	11600000	4400000	1.00:0.38	2.63158		28899
O09131	Glutathione S-transferase omega-1	200	10	2	2		44600000	38900000	41800000	9870000	7430000	10000000	44600000	38900000	41800000	9870000	7430000	10000000	1.00:0.87:0.94:0.22:0.17:0.22	41800000	9100000	41800000	9100000	1.00:0.22	4.54545		27498
O09167	60S ribosomal protein L21	200	14	2	2		29300000	29000000	31000000	115000000	104000000	117000000	29300000	29000000	31000000	115000000	104000000	117000000	1.00:0.99:1.06:3.93:3.54:3.98	29700000	112000000	29700000	112000000	1.00:3.76	0.265957		18562
O35286	Pre-mRNA-splicing factor ATP-dependent RNA helicase DHX15	144.49	3	2	2		979000	573000	573000	4070000	1740000	3570000	979000	573000	573000	4070000	1740000	3570000	1.00:0.59:0.59:4.16:1.78:3.64	781000	3130000	781000	3130000	1.00:4.01	0.249377		91007
O35379	Multidrug resistance-associated protein 1	200	11	8	8		11800000	8500000	12400000	2850000	2190000	3110000	7220000	6110000	8430000	1650000	1100000	2240000	1.00:0.85:1.17:0.23:0.15:0.31	11400000	2830000	7250000	1660000	1.00:0.23	4.34783		171184
O35593	26S proteasome non-ATPase regulatory subunit 14	119.09	15	3	3		6650000	5570000	5800000	15200000	16100000	17000000	6650000	5570000	5800000	15200000	16100000	17000000	1.00:0.84:0.87:2.28:2.41:2.55	6010000	16100000	6010000	16100000	1.00:2.68	0.373134		34577
O35598	Disintegrin and metalloproteinase domain-containing protein 10	121.48	9	4	4	Carbamidomethylation; Deamidation (NQ)	4630000	4520000	5500000	13000000	12500000	14300000	4490000	4350000	5170000	12300000	12000000	13600000	1.00:0.97:1.15:2.74:2.68:3.02	4880000	13300000	4670000	12600000	1.00:2.70	0.37037		83968
O35639	Annexin A3	89.52	61	18	18	Carbamidomethylation	281000000	257000000	276000000	113000000	94000000	110000000	96100000	93100000	99100000	44700000	37700000	41400000	1.00:0.97:1.03:0.47:0.39:0.43	271000000	105000000	96100000	41300000	1.00:0.43	2.32558		36384
O35640	Annexin A8	200	16	3	3		17900000	18300000	20300000	4560000	4020000	3000000	17900000	18300000	20300000	4560000	4020000	3000000	1.00:1.02:1.14:0.25:0.22:0.17	18800000	3860000	18800000	3860000	1.00:0.20	5		36724
O35682	Myeloid-associated differentiation marker	138.75	28	5	5	Carbamidomethylation	16400000	14300000	16000000	48900000	40800000	44400000	15500000	13400000	14700000	46200000	38700000	42000000	1.00:0.86:0.95:2.98:2.50:2.71	15600000	44700000	14500000	42300000	1.00:2.91	0.343643		35285
O35685	Nuclear migration protein nudC	200	12	3	3		13700000	12500000	14200000	3680000	2810000	2700000	13700000	12500000	14200000	3680000	2810000	2700000	1.00:0.91:1.04:0.27:0.20:0.20	13500000	3060000	13500000	3060000	1.00:0.23	4.34783		38358
O35737	Heterogeneous nuclear ribonucleoprotein H	82.03	14	4	3	Carbamidomethylation	3870000	2860000	3080000	6450000	7650000	7850000	3870000	2860000	3080000	6450000	7650000	7850000	1.00:0.74:0.79:1.66:1.98:2.03	3420000	7500000	3420000	7500000	1.00:2.19	0.456621		49199
O54724	Caveolae-associated protein 1	69.05	12	3	3	Deamidation (NQ)	18600000	12300000	12200000	7230000	6480000	6070000	17300000	11400000	11200000	7020000	6310000	5790000	1.00:0.66:0.65:0.41:0.37:0.34	14400000	6590000	13300000	6370000	1.00:0.48	2.08333		43954
O54890	Integrin beta-3	87.66	18	10	10	Carbamidomethylation	29100000	25500000	28600000	13100000	11400000	12800000	14000000	12400000	14000000	5880000	5390000	6210000	1.00:0.89:1.00:0.42:0.39:0.45	28300000	12400000	13400000	5830000	1.00:0.43	2.32558		86738
O70133	ATP-dependent RNA helicase A	200	10	9	9	Carbamidomethylation; Pyro-glu from Q	5500000	5750000	6410000	29100000	21700000	27500000	2850000	3780000	4510000	18900000	12700000	18100000	1.00:1.33:1.58:6.63:4.47:6.36	5880000	26100000	3720000	16600000	1.00:4.46	0.224215		149474
O70194	Eukaryotic translation initiation factor 3 subunit D	72.05	13	4	4	Carbamidomethylation	4820000	4680000	5510000	9270000	11300000	10500000	4200000	4160000	5060000	8290000	10500000	9640000	1.00:0.99:1.20:1.97:2.50:2.29	5000000	10400000	4470000	9470000	1.00:2.12	0.471698		63989
O70251	Elongation factor 1-beta	200	25	3	3	Carbamidomethylation	35700000	36000000	40800000	11200000	9350000	10200000	35700000	36000000	40800000	11200000	9350000	10200000	1.00:1.01:1.14:0.31:0.26:0.29	37500000	10200000	37500000	10200000	1.00:0.27	3.7037		24694
O88342	WD repeat-containing protein 1	124.75	24	9	9	Carbamidomethylation; Deamidation (NQ)	59200000	54100000	60500000	21600000	19800000	19900000	32100000	29700000	28200000	13200000	10800000	8880000	1.00:0.93:0.88:0.41:0.34:0.28	57900000	20600000	30000000	10900000	1.00:0.36	2.77778		66407
O88456	Calpain small subunit 1	119.7	18	3	3	Carbamidomethylation	19600000	18000000	19700000	9170000	3890000	8290000	19600000	18000000	19700000	9170000	3890000	8290000	1.00:0.92:1.00:0.47:0.20:0.42	19100000	8530000	19100000	8530000	1.00:0.45	2.22222		28463
O88685	26S proteasome regulatory subunit 6A	200	28	7	7	Pyro-glu from Q	11800000	10800000	10400000	41000000	39900000	42000000	6140000	5180000	5630000	24100000	23400000	23900000	1.00:0.84:0.92:3.92:3.81:3.88	11200000	41000000	5650000	23800000	1.00:4.21	0.23753		49549
O88792	Junctional adhesion molecule A	90.46	12	2	2	Carbamidomethylation	5110000	5230000	4380000	2130000	702000	2670000	5110000	5230000	4380000	2130000	702000	2670000	1.00:1.02:0.86:0.42:0.14:0.52	4910000	1830000	4910000	1830000	1.00:0.37	2.7027		32424
O88844	Isocitrate dehydrogenase [NADP] cytoplasmic	200	7	2	2		9190000	8190000	9340000	2070000	2450000	3260000	9190000	8190000	9340000	2070000	2450000	3260000	1.00:0.89:1.02:0.23:0.27:0.35	8900000	2590000	8900000	2590000	1.00:0.29	3.44828		46674
P05064	Fructose-bisphosphate aldolase A	200	57	14	12	Carbamidomethylation; Pyro-glu from Q; Deamidation (NQ)	320000000	303000000	321000000	72400000	67800000	66300000	139000000	129000000	134000000	34300000	34100000	33600000	1.00:0.93:0.96:0.25:0.25:0.24	315000000	70200000	134000000	34000000	1.00:0.25	4		39356
P05132	cAMP-dependent protein kinase catalytic subunit alpha	69.4	19	5	2	Carbamidomethylation; Phosphorylation (STY)	2550000	2190000	2150000	554000	930000	396000	2550000	2190000	2150000	554000	930000	396000	1.00:0.86:0.84:0.22:0.36:0.15	2300000	626000	2300000	626000	1.00:0.27	3.7037		40571
P06151	L-lactate dehydrogenase A chain	200	61	17	16	Carbamidomethylation; Deamidation (NQ)	329000000	290000000	304000000	82100000	74600000	74600000	156000000	134000000	142000000	38900000	34800000	36100000	1.00:0.86:0.91:0.25:0.22:0.23	308000000	79000000	144000000	36600000	1.00:0.25	4		36499
P06745	Glucose-6-phosphate isomerase	200	18	6	6		56400000	51500000	48700000	10300000	12100000	11600000	36700000	36700000	33900000	9300000	9670000	9120000	1.00:1.00:0.92:0.25:0.26:0.25	52200000	11300000	35800000	9370000	1.00:0.26	3.84615		62767
P06801	NADP-dependent malic enzyme	96.84	11	3	3	Carbamidomethylation	2920000	5010000	2930000	838000	1140000	1110000	2920000	5010000	2930000	838000	1140000	1110000	1.00:1.72:1.00:0.29:0.39:0.38	3780000	1030000	3780000	1030000	1.00:0.27	3.7037		63954
P06869	Urokinase-type plasminogen activator	92.68	16	4	4	Carbamidomethylation	4890000	5390000	4620000	11500000	11000000	12100000	4320000	4780000	3910000	9850000	9980000	10900000	1.00:1.11:0.91:2.28:2.31:2.53	4990000	11500000	4360000	10300000	1.00:2.35	0.425532		48268
P07091	Protein S100-A4	104.58	40	4	4	Carbamidomethylation; Pyro-glu from E	135000000	132000000	124000000	46700000	50900000	55900000	128000000	125000000	117000000	44900000	49400000	53600000	1.00:0.98:0.91:0.35:0.38:0.42	130000000	51200000	123000000	49300000	1.00:0.40	2.5		11721
P07742	Ribonucleoside-diphosphate reductase large subunit	200	8	3	3	Carbamidomethylation; Pyro-glu from Q	713000	1170000	800000	3260000	3770000	3820000	713000	1170000	800000	3260000	3770000	3820000	1.00:1.65:1.12:4.58:5.29:5.35	895000	3620000	895000	3620000	1.00:4.04	0.247525		90210
P07901	Heat shock protein HSP 90-alpha	143.11	53	35	23	Carbamidomethylation; Phosphorylation (STY)	405000000	365000000	389000000	135000000	123000000	137000000	122000000	107000000	115000000	36700000	35500000	44000000	1.00:0.88:0.94:0.30:0.29:0.36	387000000	134000000	115000000	38800000	1.00:0.34	2.94118		84788
P08030	Adenine phosphoribosyltransferase	153.53	47	6	6	Carbamidomethylation	11000000	9970000	12000000	35400000	29600000	33500000	8500000	8300000	8950000	27900000	24700000	27300000	1.00:0.98:1.05:3.28:2.90:3.21	11000000	33900000	8580000	26600000	1.00:3.10	0.322581		19724
P08113	Endoplasmin	200	25	11	9	Carbamidomethylation	178000000	165000000	174000000	12200000	12200000	10100000	110000000	107000000	96100000	7300000	6440000	5130000	1.00:0.97:0.87:0.07:0.06:0.05	172000000	11800000	104000000	6290000	1.00:0.06	16.6667		92476
P08228	Superoxide dismutase [Cu-Zn]	200	24	3	3	Carbamidomethylation	40600000	37800000	41900000	10400000	8910000	6330000	40600000	37800000	41900000	10400000	8910000	6330000	1.00:0.93:1.03:0.26:0.22:0.16	40100000	8550000	40100000	8550000	1.00:0.21	4.7619		15943
P08249	Malate dehydrogenase mitochondrial	200	12	3	3		40900000	36600000	41000000	2220000	2310000	2430000	40900000	36600000	41000000	2220000	2310000	2430000	1.00:0.90:1.00:0.05:0.06:0.06	39500000	2320000	39500000	2320000	1.00:0.06	16.6667		35611
P09103	Protein disulfide-isomerase	200	28	9	9	Pyro-glu from Q	141000000	110000000	142000000	10200000	7910000	8340000	64900000	60400000	66900000	6620000	3420000	4580000	1.00:0.93:1.03:0.10:0.05:0.07	131000000	9070000	64100000	4870000	1.00:0.08	12.5		57059
P0CW02	Lymphocyte antigen 6C1	200	45	3	3	Carbamidomethylation; Pyro-glu from Q	16800000	14600000	15100000	4290000	5140000	4410000	16800000	14600000	15100000	4290000	5140000	4410000	1.00:0.87:0.89:0.25:0.31:0.26	15500000	4610000	15500000	4610000	1.00:0.30	3.33333		14192
P0DP26	Calmodulin-1	200	70	6	6	Deamidation (NQ)	247000000	236000000	250000000	73600000	76700000	75300000	202000000	190000000	207000000	58100000	61400000	70200000	1.00:0.94:1.02:0.29:0.30:0.35	246000000	76400000	200000000	63900000	1.00:0.32	3.125		16838
P0DP27	Calmodulin-2	200	70	6	6	Deamidation (NQ)	247000000	236000000	250000000	73600000	76700000	75300000	202000000	190000000	207000000	58100000	61400000	70200000	1.00:0.94:1.02:0.29:0.30:0.35	246000000	76400000	200000000	63900000	1.00:0.32	3.125		16838
P0DP28	Calmodulin-3	200	70	6	6	Deamidation (NQ)	247000000	236000000	250000000	73600000	76700000	75300000	202000000	190000000	207000000	58100000	61400000	70200000	1.00:0.94:1.02:0.29:0.30:0.35	246000000	76400000	200000000	63900000	1.00:0.32	3.125		16838
P10107	Annexin A1	200	60	19	19	Carbamidomethylation; Deamidation (NQ)	665000000	652000000	660000000	194000000	186000000	192000000	311000000	299000000	296000000	92800000	84900000	88200000	1.00:0.96:0.95:0.30:0.27:0.28	659000000	192000000	302000000	88600000	1.00:0.29	3.44828		38734
P10518	Delta-aminolevulinic acid dehydratase	200	20	3	3	Carbamidomethylation	9020000	8670000	8590000	1690000	1940000	2010000	9020000	8670000	8590000	1690000	1940000	2010000	1.00:0.96:0.95:0.19:0.21:0.22	8760000	1880000	8760000	1880000	1.00:0.21	4.7619		36024
P10639	Thioredoxin	148.75	27	2	2	Carbamidomethylation	80600000	77200000	79200000	25100000	24800000	28200000	80600000	77200000	79200000	25100000	24800000	28200000	1.00:0.96:0.98:0.31:0.31:0.35	79000000	26100000	79000000	26100000	1.00:0.33	3.0303		11675
P10852	4F2 cell-surface antigen heavy chain	87.67	43	16	16	Pyro-glu from Q	196000000	183000000	216000000	84000000	83900000	92100000	71700000	69100000	67800000	30500000	29500000	30500000	1.00:0.96:0.94:0.42:0.41:0.43	198000000	87200000	69500000	30200000	1.00:0.43	2.32558		58337
P11276	Fibronectin	200	13	19	19	Carbamidomethylation	17300000	16300000	15000000	261000000	257000000	278000000	3460000	3260000	2970000	67700000	64600000	74100000	1.00:0.94:0.86:19.59:18.69:21.45	16200000	265000000	3230000	68800000	1.00:21.32	0.0469043		272536
P11440	Cyclin-dependent kinase 1	200	10	2	2		847000	697000	898000	9120000	7680000	6770000	847000	697000	898000	9120000	7680000	6770000	1.00:0.82:1.06:10.77:9.08:8.00	814000	7860000	814000	7860000	1.00:9.65	0.103627		34107
P11499	Heat shock protein HSP 90-beta	66.4	48	36	22	Carbamidomethylation; Oxidation (M); Deamidation (NQ); Phosphorylation (STY)	588000000	541000000	581000000	308000000	303000000	318000000	190000000	186000000	191000000	89600000	88400000	98800000	1.00:0.98:1.00:0.47:0.46:0.52	570000000	310000000	189000000	92300000	1.00:0.49	2.04082		83281
P11983	T-complex protein 1 subunit alpha	200	56	23	23	Carbamidomethylation; Oxidation (M); Pyro-glu from Q; Deamidation (NQ)	120000000	106000000	128000000	431000000	394000000	412000000	42200000	39800000	43500000	149000000	127000000	134000000	1.00:0.94:1.03:3.53:3.01:3.18	118000000	418000000	41800000	136000000	1.00:3.26	0.306748		60449
P12382	ATP-dependent 6-phosphofructokinase liver type	81.92	6	2	2	Carbamidomethylation	550000	725000	656000	1490000	1660000	1960000	550000	725000	656000	1490000	1660000	1960000	1.00:1.32:1.19:2.70:3.02:3.55	700000	1700000	700000	1700000	1.00:2.43	0.411523		85360
P12815	Programmed cell death protein 6	113.71	11	2	2		11800000	11300000	13000000	31700000	27700000	35000000	11800000	11300000	13000000	31700000	27700000	35000000	1.00:0.96:1.10:2.68:2.34:2.96	12000000	31500000	12000000	31500000	1.00:2.61	0.383142		21867
P12970	60S ribosomal protein L7a	133.96	50	15	15	Carbamidomethylation; Pyro-glu from Q	175000000	180000000	173000000	505000000	487000000	516000000	87900000	82600000	76900000	241000000	223000000	242000000	1.00:0.94:0.88:2.74:2.54:2.75	176000000	502000000	82500000	235000000	1.00:2.85	0.350877		29977
P13595	Neural cell adhesion molecule 1	92.38	8	5	5	Carbamidomethylation	21600000	20200000	18100000	10700000	6490000	9070000	18200000	17100000	15700000	8910000	5090000	7630000	1.00:0.94:0.86:0.49:0.28:0.42	20000000	8760000	17000000	7210000	1.00:0.42	2.38095		119427
P14115	60S ribosomal protein L27a	130.71	22	4	4	Carbamidomethylation	38400000	37800000	34800000	83500000	118000000	125000000	37400000	36900000	34800000	78300000	111000000	118000000	1.00:0.99:0.93:2.09:2.98:3.14	37400000	109000000	36400000	102000000	1.00:2.81	0.355872		16605
P14131	40S ribosomal protein S16	200	41	7	7		136000000	119000000	122000000	661000000	631000000	608000000	98800000	96600000	93700000	511000000	492000000	466000000	1.00:0.98:0.95:5.17:4.98:4.72	125000000	633000000	96400000	490000000	1.00:5.08	0.19685		16445
P14148	60S ribosomal protein L7	128	38	14	14	Pyro-glu from Q; Deamidation (NQ)	193000000	167000000	189000000	562000000	468000000	604000000	86400000	77500000	85200000	252000000	162000000	278000000	1.00:0.90:0.99:2.92:1.88:3.22	183000000	545000000	83000000	231000000	1.00:2.78	0.359712		31420
P14206	40S ribosomal protein SA	200	52	12	12	Carbamidomethylation; Deamidation (NQ)	106000000	96000000	118000000	337000000	319000000	331000000	55300000	49100000	71500000	207000000	188000000	195000000	1.00:0.89:1.29:3.75:3.40:3.52	108000000	329000000	58600000	197000000	1.00:3.36	0.297619		32838
P14211	Calreticulin	200	9	2	2	Carbamidomethylation	42400000	37200000	35400000	2550000	2460000	1650000	42400000	37200000	35400000	2550000	2460000	1650000	1.00:0.88:0.83:0.06:0.06:0.04	38300000	2400000	38300000	2400000	1.00:0.06	16.6667		47995
P14869	60S acidic ribosomal protein P0	132.79	54	13	13	Carbamidomethylation	190000000	170000000	183000000	432000000	389000000	461000000	85700000	77200000	79400000	227000000	212000000	248000000	1.00:0.90:0.93:2.65:2.47:2.90	181000000	427000000	80800000	229000000	1.00:2.84	0.352113		34216
P14873	Microtubule-associated protein 1B	200	3	5	4		10300000	9750000	10100000	1810000	1830000	1990000	8420000	7570000	8490000	1470000	1460000	1680000	1.00:0.90:1.01:0.17:0.17:0.20	10000000	1880000	8160000	1530000	1.00:0.19	5.26316		270252
P16045	Galectin-1	125.79	63	6	6	Carbamidomethylation; Oxidation (M); Deamidation (NQ)	701000000	655000000	686000000	253000000	243000000	260000000	620000000	546000000	574000000	210000000	201000000	221000000	1.00:0.88:0.93:0.34:0.32:0.36	681000000	252000000	580000000	211000000	1.00:0.36	2.77778		14866
P16460	Argininosuccinate synthase	200	7	2	2		3810000	3250000	3780000	12500000	12600000	12700000	3810000	3250000	3780000	12500000	12600000	12700000	1.00:0.85:0.99:3.29:3.31:3.32	3610000	12600000	3610000	12600000	1.00:3.49	0.286533		46585
P16546	Spectrin alpha chain non-erythrocytic 1	200	6	9	9	Pyro-glu from Q	23500000	19500000	22600000	3330000	3660000	3600000	12000000	9410000	11100000	1430000	1820000	1620000	1.00:0.78:0.92:0.12:0.15:0.13	22300000	3590000	10800000	1630000	1.00:0.15	6.66667		284596
P17182	Alpha-enolase	143.53	60	17	13	Carbamidomethylation; Deamidation (NQ)	853000000	670000000	778000000	309000000	305000000	325000000	437000000	406000000	437000000	142000000	138000000	152000000	1.00:0.93:1.00:0.32:0.32:0.35	767000000	313000000	427000000	144000000	1.00:0.34	2.94118		47141
P17742	Peptidyl-prolyl cis-trans isomerase A	142.92	30	5	5	Carbamidomethylation; Phosphorylation (STY)	237000000	223000000	227000000	77900000	84000000	94100000	199000000	191000000	199000000	58600000	66600000	74000000	1.00:0.96:1.00:0.29:0.33:0.37	229000000	85300000	196000000	66400000	1.00:0.34	2.94118		17971
P17751	Triosephosphate isomerase	200	40	9	9	Carbamidomethylation	237000000	214000000	230000000	71700000	67700000	72700000	146000000	134000000	149000000	44400000	42200000	45700000	1.00:0.92:1.02:0.30:0.29:0.31	227000000	70700000	143000000	44100000	1.00:0.31	3.22581		32192
P17809	Solute carrier family 2 facilitated glucose transporter member 1	109.54	14	5	5		40900000	41800000	41200000	17100000	17100000	15900000	38800000	39100000	37900000	15400000	15300000	14600000	1.00:1.01:0.98:0.40:0.39:0.38	41300000	16700000	38600000	15100000	1.00:0.39	2.5641		53985
P18242	Cathepsin D	141.62	10	4	4	Carbamidomethylation; Pyro-glu from Q	10500000	10400000	11400000	4290000	3250000	4250000	8940000	8970000	9790000	3610000	2420000	3380000	1.00:1.00:1.10:0.40:0.27:0.38	10800000	3930000	9230000	3140000	1.00:0.34	2.94118		44954
P18572	Basigin	109.25	20	6	6	Carbamidomethylation	129000000	112000000	125000000	48500000	37900000	55200000	94700000	87000000	90900000	34900000	33300000	38300000	1.00:0.92:0.96:0.37:0.35:0.40	122000000	50700000	90900000	35500000	1.00:0.39	2.5641		42445
P18760	Cofilin-1	200	58	11	10	Carbamidomethylation	448000000	400000000	423000000	119000000	112000000	109000000	258000000	222000000	231000000	73600000	71500000	72000000	1.00:0.86:0.90:0.28:0.28:0.28	424000000	113000000	237000000	72400000	1.00:0.31	3.22581		18560
P19253	60S ribosomal protein L13a	200	27	6	6	Carbamidomethylation	78600000	74400000	80300000	283000000	273000000	291000000	61100000	57900000	63000000	213000000	202000000	214000000	1.00:0.95:1.03:3.49:3.30:3.51	77800000	282000000	60700000	210000000	1.00:3.46	0.289017		23464
P19324	Serpin H1	200	18	5	5		84500000	74100000	80200000	6520000	5620000	6990000	70500000	62800000	65200000	5610000	5530000	6070000	1.00:0.89:0.92:0.08:0.08:0.09	79600000	6540000	66200000	5740000	1.00:0.09	11.1111		46534
P20029	Endoplasmic reticulum chaperone BiP	200	24	11	9	Deamidation (NQ)	284000000	269000000	284000000	15200000	14300000	16300000	121000000	115000000	122000000	6860000	6440000	6000000	1.00:0.95:1.01:0.06:0.05:0.05	279000000	15300000	119000000	6440000	1.00:0.05	20		72422
P21107	Tropomyosin alpha-3 chain	200	17	4	2		32500000	33200000	33800000	2520000	2750000	3450000	32500000	33200000	33800000	2520000	2750000	3450000	1.00:1.02:1.04:0.08:0.08:0.11	33100000	3100000	33100000	3100000	1.00:0.09	11.1111		32994
P21278	Guanine nucleotide-binding protein subunit alpha-11	90.19	23	6	5	Carbamidomethylation	28800000	28400000	29600000	14100000	8410000	16100000	22100000	23100000	23300000	9960000	7100000	12300000	1.00:1.05:1.06:0.45:0.32:0.56	28900000	12900000	22800000	9780000	1.00:0.43	2.32558		42024
P21550	Beta-enolase	200	40	10	6	Carbamidomethylation; Deamidation (NQ)	67200000	59500000	62300000	16000000	10700000	12400000	42700000	36500000	40600000	9770000	4610000	5670000	1.00:0.86:0.95:0.23:0.11:0.13	63000000	13000000	39900000	6680000	1.00:0.17	5.88235		47025
P21995	Embigin	125.72	17	4	4	Carbamidomethylation; Deamidation (NQ)	13100000	12300000	11300000	3800000	4670000	4920000	10700000	10100000	9370000	3010000	3640000	4300000	1.00:0.94:0.87:0.28:0.34:0.40	12200000	4890000	10100000	4070000	1.00:0.41	2.43902		37064
P23242	Gap junction alpha-1 protein	103.64	20	5	5	Carbamidomethylation; Pyro-glu from Q	16100000	13100000	13300000	40100000	33700000	35800000	12800000	10300000	10600000	30400000	25800000	28000000	1.00:0.80:0.83:2.37:2.01:2.18	14200000	36600000	11200000	28000000	1.00:2.49	0.401606		43004
P23927	Alpha-crystallin B chain	124.62	37	6	6	Pyro-glu from Q; Deamidation (NQ)	13900000	13400000	14200000	35800000	37700000	39400000	10100000	9710000	10100000	24800000	27600000	29600000	1.00:0.96:1.01:2.46:2.74:2.94	13800000	37900000	9980000	27400000	1.00:2.74	0.364964		20069
P24452	Macrophage-capping protein	117.87	18	4	4	Pyro-glu from Q	23900000	20100000	23300000	8830000	6870000	8370000	21000000	17200000	20100000	8200000	6140000	7540000	1.00:0.82:0.96:0.39:0.29:0.36	22400000	8030000	19400000	7290000	1.00:0.38	2.63158		39240
P24472	Glutathione S-transferase A4	200	11	2	2		19300000	17500000	20200000	3660000	2720000	3250000	19300000	17500000	20200000	3660000	2720000	3250000	1.00:0.91:1.05:0.19:0.14:0.17	19000000	3210000	19000000	3210000	1.00:0.17	5.88235		25564
P25444	40S ribosomal protein S2	200	44	12	12	Carbamidomethylation; Pyro-glu from E; Deamidation (NQ)	242000000	213000000	224000000	1150000000	1090000000	1190000000	125000000	109000000	115000000	551000000	520000000	595000000	1.00:0.87:0.92:4.41:4.16:4.75	226000000	1140000000	117000000	556000000	1.00:4.76	0.210084		31231
P26040	Ezrin	81.54	20	10	4	Pyro-glu from Q	19400000	19200000	16900000	6090000	8380000	8870000	17400000	17300000	14600000	5510000	7820000	8770000	1.00:0.99:0.84:0.32:0.45:0.50	18500000	7780000	16400000	7370000	1.00:0.45	2.22222		69407
P26041	Moesin	102.45	49	27	19	Carbamidomethylation; Pyro-glu from Q	322000000	329000000	350000000	126000000	115000000	129000000	150000000	143000000	158000000	58500000	62100000	61000000	1.00:0.96:1.05:0.39:0.42:0.41	334000000	123000000	150000000	60500000	1.00:0.40	2.5		67767
P26043	Radixin	200	23	11	3	Carbamidomethylation; Pyro-glu from Q	12300000	12100000	13600000	2940000	3200000	3420000	12300000	12100000	13600000	2940000	3200000	3420000	1.00:0.99:1.10:0.24:0.26:0.28	12700000	3190000	12700000	3190000	1.00:0.25	4		68543
P26516	26S proteasome non-ATPase regulatory subunit 7	57.6	39	7	7		11400000	9500000	11800000	25200000	25100000	19400000	7820000	7120000	7690000	17800000	15600000	10400000	1.00:0.91:0.98:2.28:2.00:1.34	10900000	26600000	7540000	17700000	1.00:2.34	0.42735		36540
P26645	Myristoylated alanine-rich C-kinase substrate	200	67	11	11	Deamidation (NQ); Phosphorylation (STY)	453000000	396000000	386000000	125000000	111000000	125000000	333000000	290000000	273000000	92900000	83000000	94400000	1.00:0.87:0.82:0.28:0.25:0.28	412000000	121000000	299000000	90100000	1.00:0.30	3.33333		29661
P27659	60S ribosomal protein L3	200	25	8	8	Carbamidomethylation; Deamidation (NQ)	79700000	73300000	71900000	299000000	264000000	288000000	49700000	47900000	45000000	199000000	172000000	191000000	1.00:0.96:0.90:4.01:3.46:3.84	75000000	287000000	47500000	190000000	1.00:3.99	0.250627		46110
P27773	Protein disulfide-isomerase A3	200	18	7	7		127000000	110000000	120000000	7080000	4680000	6840000	86200000	72400000	76100000	5190000	2860000	4450000	1.00:0.84:0.88:0.06:0.03:0.05	119000000	6260000	78200000	4170000	1.00:0.05	20		56678
P28271	Cytoplasmic aconitate hydratase	79.75	4	3	3		1710000	1060000	1220000	2960000	2730000	3130000	1710000	1060000	1220000	2960000	2730000	3130000	1.00:0.62:0.71:1.73:1.60:1.83	1390000	2940000	1390000	2940000	1.00:2.12	0.471698		98126
P28667	MARCKS-related protein	114.26	24	2	2		16300000	16000000	16200000	5970000	5640000	6900000	16300000	16000000	16200000	5970000	5640000	6900000	1.00:0.98:0.99:0.37:0.35:0.42	16200000	6170000	16200000	6170000	1.00:0.38	2.63158		20165
P29533	Vascular cell adhesion protein 1	200	5	3	3		5770000	4590000	5440000	1700000	2020000	1230000	5770000	4590000	5440000	1700000	2020000	1230000	1.00:0.80:0.94:0.29:0.35:0.21	5270000	1770000	5270000	1770000	1.00:0.34	2.94118		81317
P30416	Peptidyl-prolyl cis-trans isomerase FKBP4	74.14	16	4	4	Carbamidomethylation; Deamidation (NQ)	3930000	5620000	5580000	2140000	3680000	1580000	3910000	3650000	5580000	1880000	2730000	1520000	1.00:0.93:1.43:0.48:0.70:0.39	5370000	2460000	4380000	2040000	1.00:0.47	2.12766		51572
P30999	Catenin delta-1	123.27	9	5	5	Carbamidomethylation; Pyro-glu from Q	1880000	2050000	1630000	4900000	5540000	6390000	1760000	1930000	1530000	4670000	5330000	6180000	1.00:1.10:0.87:2.65:3.03:3.51	1850000	5610000	1740000	5390000	1.00:3.10	0.322581		104925
P32067	Lupus La protein homolog	200	19	6	6	Carbamidomethylation	9790000	7580000	8000000	32400000	27100000	36600000	6180000	5050000	5770000	21900000	20600000	23700000	1.00:0.82:0.93:3.54:3.33:3.83	8460000	32000000	5670000	22000000	1.00:3.89	0.257069		47756
P34884	Macrophage migration inhibitory factor	127.02	36	3	3	Carbamidomethylation	102000000	90000000	102000000	32200000	36600000	37300000	102000000	90000000	102000000	32200000	36600000	37300000	1.00:0.88:0.99:0.31:0.36:0.37	98000000	35400000	98000000	35400000	1.00:0.36	2.77778		12504
P35564	Calnexin	200	16	9	9	Pyro-glu from Q; Phosphorylation (STY)	60700000	61600000	53800000	10800000	10900000	6530000	34900000	37000000	40300000	3520000	3450000	3480000	1.00:1.06:1.15:0.10:0.10:0.10	58700000	9470000	37400000	3490000	1.00:0.09	11.1111		67278
P35700	Peroxiredoxin-1	92.6	54	8	7	Carbamidomethylation	157000000	144000000	149000000	59100000	61400000	60400000	110000000	103000000	106000000	43800000	45700000	45500000	1.00:0.93:0.96:0.40:0.41:0.41	150000000	60300000	106000000	45000000	1.00:0.42	2.38095		22176
P35762	CD81 antigen	75.2	31	4	4	Carbamidomethylation; Oxidation (M); Pyro-glu from Q; Deamidation (NQ)	53800000	49000000	54200000	131000000	101000000	113000000	49000000	44900000	48500000	114000000	88400000	105000000	1.00:0.92:0.99:2.33:1.80:2.13	52600000	116000000	47500000	102000000	1.00:2.16	0.462963		25815
P35979	60S ribosomal protein L12	116.98	55	6	6	Carbamidomethylation; Pyro-glu from Q	149000000	134000000	141000000	387000000	395000000	409000000	89400000	89400000	87200000	231000000	239000000	236000000	1.00:1.00:0.98:2.58:2.67:2.64	141000000	397000000	88700000	235000000	1.00:2.65	0.377358		17805
P35980	60S ribosomal protein L18	68.75	19	3	3		114000000	104000000	111000000	257000000	159000000	269000000	114000000	104000000	111000000	257000000	159000000	269000000	1.00:0.91:0.97:2.25:1.39:2.35	110000000	228000000	110000000	228000000	1.00:2.08	0.480769		21645
P38647	Stress-70 protein mitochondrial	200	9	4	4	Deamidation (NQ)	17500000	15400000	17500000	2050000	2250000	2370000	15000000	13700000	15900000	1470000	2030000	2030000	1.00:0.91:1.06:0.10:0.14:0.14	16800000	2220000	14900000	1840000	1.00:0.12	8.33333		73461
P39447	Tight junction protein ZO-1	115.54	3	4	4	Deamidation (NQ)	2640000	2450000	2520000	1050000	1110000	1140000	2320000	2180000	2190000	700000	906000	793000	1.00:0.94:0.94:0.30:0.39:0.34	2540000	1100000	2230000	800000	1.00:0.36	2.77778		194740
P40124	Adenylyl cyclase-associated protein 1	200	33	9	9	Carbamidomethylation	92200000	79800000	89800000	23100000	26300000	24500000	52400000	44700000	52100000	13100000	16800000	13100000	1.00:0.85:1.00:0.25:0.32:0.25	87300000	25200000	49700000	14300000	1.00:0.29	3.44828		51565
P40237	CD82 antigen	73.03	9	2	2		41600000	43200000	41300000	96000000	86300000	86100000	41600000	43200000	41300000	96000000	86300000	86100000	1.00:1.04:0.99:2.31:2.07:2.07	42000000	89500000	42000000	89500000	1.00:2.13	0.469484		29629
P41105	60S ribosomal protein L28	200	14	2	2	Carbamidomethylation; Deamidation (NQ)	19400000	20600000	22500000	67400000	68100000	65200000	18600000	20200000	21800000	64100000	65400000	62300000	1.00:1.08:1.17:3.45:3.51:3.35	20800000	66900000	20200000	63900000	1.00:3.17	0.315457		15733
P42208	Septin-2	200	20	5	5	Carbamidomethylation; Phosphorylation (STY)	26800000	26100000	21900000	5300000	5280000	5270000	21600000	18600000	19400000	3530000	3480000	3880000	1.00:0.86:0.90:0.16:0.16:0.18	24900000	5280000	19900000	3630000	1.00:0.18	5.55556		41526
P42932	T-complex protein 1 subunit theta	200	53	20	20	Carbamidomethylation; Pyro-glu from Q; Deamidation (NQ)	175000000	145000000	169000000	450000000	462000000	458000000	49600000	36600000	45700000	142000000	153000000	153000000	1.00:0.74:0.92:2.87:3.09:3.07	166000000	460000000	43900000	149000000	1.00:3.40	0.294118		59556
P43276	Histone H1.5	200	18	3	3		4320000	3630000	4340000	34500000	35400000	34300000	4320000	3630000	4340000	34500000	35400000	34300000	1.00:0.84:1.00:8.00:8.20:7.95	4090000	34800000	4090000	34800000	1.00:8.49	0.117786		22576
P43406	Integrin alpha-V	91	20	13	13	Carbamidomethylation; Pyro-glu from Q; Deamidation (NQ)	62000000	56000000	63600000	25600000	27100000	30800000	27400000	23700000	25000000	8790000	10400000	13300000	1.00:0.86:0.91:0.32:0.38:0.48	61600000	27800000	25400000	10800000	1.00:0.43	2.32558		115360
P45591	Cofilin-2	200	29	3	2	Pyro-glu from Q	17500000	16200000	15700000	3910000	3670000	3630000	13200000	12200000	11200000	2710000	2560000	2510000	1.00:0.93:0.85:0.21:0.19:0.19	16500000	3740000	12200000	2590000	1.00:0.21	4.7619		18710
P46061	Ran GTPase-activating protein 1	156.54	19	5	5	Carbamidomethylation; Pyro-glu from Q	4540000	5120000	4890000	1550000	886000	1980000	3240000	3800000	3650000	1010000	624000	1780000	1.00:1.17:1.12:0.31:0.19:0.55	4850000	1690000	3560000	1330000	1.00:0.37	2.7027		63531
P46471	26S proteasome regulatory subunit 7	200	38	12	12	Carbamidomethylation; Pyro-glu from Q	10100000	10600000	11500000	53900000	53000000	56300000	4570000	5370000	5740000	24400000	22900000	26100000	1.00:1.17:1.25:5.33:5.00:5.70	10800000	54400000	5230000	24400000	1.00:4.68	0.213675		48648
P46638	Ras-related protein Rab-11B	150.51	31	6	2		7710000	7760000	8560000	2890000	2930000	2040000	7710000	7760000	8560000	2890000	2930000	2040000	1.00:1.01:1.11:0.38:0.38:0.26	8010000	2620000	8010000	2620000	1.00:0.33	3.0303		24489
P47791	Glutathione reductase mitochondrial	200	7	2	2		2480000	2190000	2600000	544000	323000	76200	2480000	2190000	2600000	544000	323000	76200	1.00:0.88:1.05:0.22:0.13:0.03	2420000	314000	2420000	314000	1.00:0.13	7.69231		53663
P47911	60S ribosomal protein L6	124.07	33	11	11	Pyro-glu from Q	248000000	231000000	237000000	610000000	681000000	713000000	107000000	98500000	94300000	203000000	304000000	313000000	1.00:0.92:0.88:1.90:2.84:2.92	238000000	668000000	100000000	273000000	1.00:2.74	0.364964		33510
P47962	60S ribosomal protein L5	77.41	40	7	7	Carbamidomethylation; Oxidation (M); Deamidation (NQ)	47400000	52000000	55400000	112000000	108000000	110000000	33900000	39400000	40100000	85700000	79700000	82100000	1.00:1.16:1.18:2.53:2.35:2.42	51600000	111000000	37800000	82500000	1.00:2.18	0.458716		34401
P47963	60S ribosomal protein L13	139.05	20	4	4		100000000	94100000	102000000	280000000	290000000	296000000	90400000	88000000	92800000	254000000	264000000	272000000	1.00:0.97:1.03:2.81:2.92:3.01	98700000	289000000	90400000	263000000	1.00:2.91	0.343643		24305
P47964	60S ribosomal protein L36	200	18	2	2	Carbamidomethylation	18300000	19900000	19000000	77900000	72400000	68600000	18300000	19900000	19000000	77900000	72400000	68600000	1.00:1.09:1.04:4.27:3.97:3.76	19100000	73000000	19100000	73000000	1.00:3.83	0.261097		12216
P48036	Annexin A5	137.4	62	17	17	Carbamidomethylation; Pyro-glu from Q	563000000	523000000	540000000	183000000	174000000	192000000	235000000	217000000	221000000	77100000	73000000	82800000	1.00:0.93:0.94:0.33:0.31:0.35	542000000	183000000	225000000	77600000	1.00:0.35	2.85714		35752
P48678	Prelamin-A/C	200	37	18	18	Carbamidomethylation	99400000	94500000	97500000	38000000	34100000	32900000	41600000	41200000	38400000	12800000	9350000	8480000	1.00:0.99:0.92:0.31:0.22:0.20	97100000	35100000	40400000	10200000	1.00:0.25	4		74238
P48999	Arachidonate 5-lipoxygenase	200	4	2	2	Carbamidomethylation	5840000	5170000	5560000	1120000	1300000	1270000	5840000	5170000	5560000	1120000	1300000	1270000	1.00:0.89:0.95:0.19:0.22:0.22	5520000	1230000	5520000	1230000	1.00:0.22	4.54545		77967
P49312	Heterogeneous nuclear ribonucleoprotein A1	88.82	17	4	4		9600000	14700000	12200000	5570000	6520000	6310000	9600000	14100000	11900000	4860000	5320000	5160000	1.00:1.47:1.24:0.51:0.55:0.54	12300000	6130000	11900000	5110000	1.00:0.43	2.32558		34196
P50543	Protein S100-A11	122.6	64	3	3	Carbamidomethylation	46600000	44300000	45000000	15800000	16800000	17400000	46600000	44300000	45000000	15800000	16800000	17400000	1.00:0.95:0.97:0.34:0.36:0.37	45300000	16700000	45300000	16700000	1.00:0.37	2.7027		11083
P53986	Monocarboxylate transporter 1	136.41	14	4	4	Carbamidomethylation	50800000	44300000	52000000	16800000	16800000	15600000	47900000	41400000	48800000	16300000	16400000	15200000	1.00:0.86:1.02:0.34:0.34:0.32	49000000	16400000	46000000	16000000	1.00:0.35	2.85714		53267
P53994	Ras-related protein Rab-2A	101.64	49	7	7	Carbamidomethylation	34300000	32400000	32700000	15100000	13700000	12500000	24800000	24000000	24100000	11300000	9660000	8540000	1.00:0.97:0.97:0.46:0.39:0.34	33400000	13800000	24300000	9840000	1.00:0.40	2.5		23548
P54775	26S proteasome regulatory subunit 6B	200	27	5	5		5120000	4580000	5060000	25800000	25200000	26000000	3710000	3280000	3700000	19500000	19200000	19700000	1.00:0.88:1.00:5.26:5.18:5.32	4920000	25700000	3560000	19500000	1.00:5.47	0.182815		47408
P56399	Ubiquitin carboxyl-terminal hydrolase 5	129.56	5	3	3		12300000	12000000	12600000	4610000	3680000	4880000	12300000	12000000	12600000	4610000	3680000	4880000	1.00:0.97:1.02:0.37:0.30:0.40	12300000	4390000	12300000	4390000	1.00:0.36	2.77778		95833
P56480	ATP synthase subunit beta mitochondrial	200	7	2	2		24900000	22200000	22500000	593000	392000	814000	24900000	22200000	22500000	593000	392000	814000	1.00:0.89:0.90:0.02:0.02:0.03	23200000	600000	23200000	600000	1.00:0.03	33.3333		56301
P57716	Nicastrin	77.52	7	3	3		7880000	6950000	6360000	911000	2900000	2770000	7880000	6950000	6360000	911000	2900000	2770000	1.00:0.88:0.81:0.12:0.37:0.35	7060000	2890000	7060000	2890000	1.00:0.41	2.43902		78492
P57776	Elongation factor 1-delta	150.51	44	7	7	Carbamidomethylation; Phosphorylation (STY)	66300000	68400000	68700000	21300000	27100000	22400000	40900000	42800000	38100000	11400000	16200000	12400000	1.00:1.05:0.93:0.28:0.40:0.30	67800000	26200000	40600000	15500000	1.00:0.38	2.63158		31293
P57780	Alpha-actinin-4	200	31	20	10	Carbamidomethylation	71600000	66100000	69000000	13300000	11600000	11200000	27600000	25400000	26800000	5220000	4560000	3660000	1.00:0.92:0.97:0.19:0.17:0.13	68900000	12000000	26600000	4480000	1.00:0.17	5.88235		104977
P57784	U2 small nuclear ribonucleoprotein A'	25.79	20	3	3		1410000	712000	770000	1750000	2740000	2860000	1410000	712000	770000	1750000	2740000	2860000	1.00:0.51:0.55:1.24:1.95:2.03	1140000	2840000	1140000	2840000	1.00:2.49	0.401606		28357
P58242	Acid sphingomyelinase-like phosphodiesterase 3b	93.36	15	3	3		9800000	8940000	10200000	4450000	4140000	3620000	9800000	8940000	10200000	4450000	4140000	3620000	1.00:0.91:1.04:0.45:0.42:0.37	9650000	4070000	9650000	4070000	1.00:0.42	2.38095		51600
P60122	RuvB-like 1	200	21	7	7		7020000	7000000	5550000	30100000	28800000	31700000	4070000	4260000	2490000	17500000	17100000	19100000	1.00:1.05:0.61:4.31:4.21:4.71	6950000	30200000	4030000	17900000	1.00:4.45	0.224719		50214
P60843	Eukaryotic initiation factor 4A-I	200	39	12	5	Pyro-glu from Q	4320000	5070000	3930000	22600000	22800000	24300000	2970000	4080000	3470000	19500000	19000000	20900000	1.00:1.37:1.17:6.58:6.41:7.04	5170000	23200000	4240000	19800000	1.00:4.68	0.213675		46154
P60867	40S ribosomal protein S20	137.4	29	4	4	Carbamidomethylation	71600000	68800000	76500000	222000000	201000000	213000000	70200000	67300000	74800000	210000000	201000000	203000000	1.00:0.96:1.07:2.99:2.87:2.90	72300000	216000000	70800000	205000000	1.00:2.89	0.346021		13373
P61087	Ubiquitin-conjugating enzyme E2 K	30.7	20	3	2	Carbamidomethylation	1880000	2430000	2130000	582000	247000	768000	1880000	2430000	2130000	582000	247000	768000	1.00:1.29:1.14:0.31:0.13:0.41	2140000	532000	2140000	532000	1.00:0.25	4		22407
P61358	60S ribosomal protein L27	143.53	29	4	4		70600000	76400000	70700000	162000000	242000000	253000000	64300000	71300000	64800000	138000000	223000000	234000000	1.00:1.11:1.01:2.15:3.46:3.63	72600000	219000000	66800000	198000000	1.00:2.97	0.3367		15798
P61982	14-3-3 protein gamma	200	23	5	3	Carbamidomethylation	18700000	16800000	18800000	5030000	4540000	5250000	17600000	15900000	17600000	4830000	4260000	4990000	1.00:0.91:1.00:0.28:0.24:0.28	18100000	4940000	17000000	4690000	1.00:0.28	3.57143		28303
P62137	Serine/threonine-protein phosphatase PP1-alpha catalytic subunit	99.15	35	9	3	Carbamidomethylation; Pyro-glu from Q	4400000	3460000	5400000	10700000	9800000	11900000	4400000	3460000	5400000	10700000	9800000	11900000	1.00:0.79:1.23:2.42:2.23:2.70	4420000	10800000	4420000	10800000	1.00:2.44	0.409836		37540
P62192	26S proteasome regulatory subunit 4	200	8	2	2		1140000	1610000	1590000	7480000	8070000	6330000	1140000	1610000	1590000	7480000	8070000	6330000	1.00:1.41:1.40:6.55:7.07:5.54	1450000	7300000	1450000	7300000	1.00:5.04	0.198413		49185
P62196	26S proteasome regulatory subunit 8	200	13	4	4	Carbamidomethylation	2680000	3260000	3660000	18700000	12800000	17900000	2350000	2880000	3310000	17600000	11600000	16400000	1.00:1.22:1.41:7.48:4.92:6.95	3200000	16500000	2850000	15200000	1.00:5.33	0.187617		45626
P62242	40S ribosomal protein S8	200	47	8	8	Carbamidomethylation; Pyro-glu from Q; Deamidation (NQ)	234000000	207000000	208000000	1040000000	1210000000	1180000000	115000000	97600000	99400000	476000000	635000000	649000000	1.00:0.85:0.86:4.14:5.53:5.64	216000000	1140000000	104000000	587000000	1.00:5.64	0.177305		24205
P62245	40S ribosomal protein S15a	200	52	6	6	Pyro-glu from Q; Deamidation (NQ)	34000000	32700000	34500000	156000000	142000000	147000000	27000000	28400000	28300000	128000000	112000000	120000000	1.00:1.05:1.05:4.76:4.15:4.47	33800000	148000000	27900000	120000000	1.00:4.31	0.232019		14840
P62259	14-3-3 protein epsilon	143.11	33	10	8		142000000	156000000	158000000	48300000	49400000	55700000	96500000	95900000	96200000	29900000	31300000	36300000	1.00:0.99:1.00:0.31:0.32:0.38	152000000	51100000	96200000	32500000	1.00:0.34	2.94118		29174
P62264	40S ribosomal protein S14	200	38	6	6		54200000	52300000	56600000	219000000	195000000	200000000	48700000	45800000	50400000	191000000	167000000	173000000	1.00:0.94:1.04:3.92:3.43:3.55	54400000	205000000	48300000	177000000	1.00:3.66	0.273224		16273
P62267	40S ribosomal protein S23	200	36	5	5	Carbamidomethylation	30600000	29600000	29600000	162000000	143000000	166000000	28200000	27300000	27200000	154000000	131000000	154000000	1.00:0.97:0.97:5.46:4.66:5.46	29900000	158000000	27600000	146000000	1.00:5.31	0.188324		15808
P62270	40S ribosomal protein S18	200	34	6	6	Deamidation (NQ)	133000000	125000000	135000000	409000000	408000000	398000000	98100000	91600000	98000000	301000000	291000000	336000000	1.00:0.93:1.00:3.06:2.97:3.43	131000000	405000000	95900000	310000000	1.00:3.23	0.309598		17719
P62274	40S ribosomal protein S29	107.49	34	2	2		3250000	3170000	2690000	17600000	21200000	19600000	3250000	3170000	2690000	17600000	21200000	19600000	1.00:0.97:0.83:5.41:6.53:6.03	3040000	19500000	3040000	19500000	1.00:6.41	0.156006		6677
P62281	40S ribosomal protein S11	200	35	7	7	Carbamidomethylation; Pyro-glu from Q	45000000	41900000	41800000	280000000	255000000	271000000	36700000	30000000	28500000	199000000	176000000	183000000	1.00:0.82:0.78:5.41:4.79:4.99	43600000	268000000	31700000	186000000	1.00:5.86	0.170648		18431
P62301	40S ribosomal protein S13	134.77	38	6	6		168000000	153000000	155000000	519000000	449000000	438000000	133000000	119000000	126000000	408000000	348000000	326000000	1.00:0.89:0.95:3.07:2.61:2.45	160000000	469000000	126000000	361000000	1.00:2.86	0.34965		17222
P62305	Small nuclear ribonucleoprotein E	76.94	39	2	2	Carbamidomethylation	1830000	1490000	1730000	3440000	3380000	4140000	1830000	1490000	1730000	3440000	3380000	4140000	1.00:0.81:0.95:1.88:1.85:2.27	1680000	3650000	1680000	3650000	1.00:2.18	0.458716		10804
P62315	Small nuclear ribonucleoprotein Sm D1	129.44	37	3	3		13200000	11800000	12900000	38800000	32400000	34700000	13200000	11800000	12900000	38800000	32400000	34700000	1.00:0.89:0.98:2.95:2.46:2.64	12600000	35300000	12600000	35300000	1.00:2.80	0.357143		13282
P62334	26S proteasome regulatory subunit 10B	200	15	3	3		4620000	5330000	5010000	23800000	20800000	21700000	4620000	5330000	5010000	23800000	20800000	21700000	1.00:1.15:1.08:5.16:4.51:4.70	4990000	22100000	4990000	22100000	1.00:4.44	0.225225		44173
P62702	40S ribosomal protein S4 X isoform	200	48	13	13	Carbamidomethylation; Pyro-glu from E	141000000	134000000	156000000	583000000	581000000	559000000	59800000	52000000	64900000	270000000	247000000	197000000	1.00:0.87:1.09:4.52:4.13:3.30	144000000	575000000	58900000	238000000	1.00:4.04	0.247525		29598
P62717	60S ribosomal protein L18a	200	32	6	6	Carbamidomethylation; Deamidation (NQ)	54100000	51800000	52800000	195000000	190000000	201000000	50400000	49000000	49500000	179000000	173000000	185000000	1.00:0.97:0.98:3.55:3.43:3.67	52900000	195000000	49600000	179000000	1.00:3.61	0.277008		20732
P62754	40S ribosomal protein S6	200	26	5	5	Carbamidomethylation; Oxidation (M)	104000000	96200000	106000000	544000000	491000000	562000000	89500000	84500000	92300000	466000000	440000000	488000000	1.00:0.94:1.03:5.20:4.91:5.46	102000000	532000000	88700000	464000000	1.00:5.23	0.191205		28681
P62806	Histone H4	200	41	4	4		25400000	24000000	27400000	993000000	636000000	945000000	23300000	22100000	25600000	933000000	579000000	882000000	1.00:0.95:1.10:40.06:24.86:37.89	25600000	858000000	23700000	798000000	1.00:33.70	0.0296736		11367
P62827	GTP-binding nuclear protein Ran	153.53	36	8	8	Carbamidomethylation	72800000	68600000	69700000	200000000	205000000	199000000	39100000	35100000	38900000	114000000	119000000	119000000	1.00:0.90:1.00:2.91:3.04:3.03	70400000	204000000	37700000	117000000	1.00:3.11	0.321543		24423
P62830	60S ribosomal protein L23	73.33	31	3	3	Carbamidomethylation	25400000	23200000	24400000	52800000	48300000	54700000	25400000	23200000	24400000	52800000	48300000	54700000	1.00:0.91:0.96:2.07:1.90:2.15	24300000	51900000	24300000	51900000	1.00:2.13	0.469484		14865
P62843	40S ribosomal protein S15	102	56	5	5	Oxidation (M); Deamidation (NQ)	32100000	27800000	29800000	74000000	71400000	77700000	18000000	16500000	17400000	42600000	40700000	45000000	1.00:0.92:0.97:2.37:2.26:2.51	29900000	74400000	17300000	42700000	1.00:2.47	0.404858		17040
P62849	40S ribosomal protein S24	200	29	4	4	Pyro-glu from Q	31500000	25900000	31800000	115000000	118000000	99300000	27300000	24500000	27000000	84600000	88500000	94900000	1.00:0.90:0.99:3.10:3.25:3.48	30700000	119000000	26300000	89400000	1.00:3.40	0.294118		15423
P62852	40S ribosomal protein S25	121.59	24	4	4		143000000	139000000	138000000	390000000	352000000	390000000	130000000	126000000	130000000	359000000	330000000	356000000	1.00:0.96:1.00:2.75:2.53:2.73	140000000	378000000	129000000	348000000	1.00:2.71	0.369004		13742
P62855	40S ribosomal protein S26	200	31	3	3	Carbamidomethylation; Oxidation (M)	44100000	40200000	44200000	227000000	233000000	233000000	44100000	40200000	44200000	227000000	233000000	233000000	1.00:0.91:1.00:5.15:5.28:5.28	42800000	231000000	42800000	231000000	1.00:5.40	0.185185		13015
P62874	Guanine nucleotide-binding protein G(I)/G(S)/G(T) subunit beta-1	70.2	48	10	7	Carbamidomethylation; Oxidation (M); Pyro-glu from Q; Deamidation (NQ)	90900000	87000000	94800000	45400000	38500000	42500000	67300000	65700000	69300000	34300000	29800000	32500000	1.00:0.98:1.03:0.51:0.44:0.48	90900000	42100000	67400000	32200000	1.00:0.48	2.08333		37377
P62880	Guanine nucleotide-binding protein G(I)/G(S)/G(T) subunit beta-2	88.07	32	7	3	Carbamidomethylation; Oxidation (M)	30000000	28200000	31100000	7760000	16600000	15300000	16600000	14900000	16700000	7190000	6640000	7050000	1.00:0.90:1.00:0.43:0.40:0.42	29800000	13800000	16100000	7100000	1.00:0.44	2.27273		37331
P62889	60S ribosomal protein L30	140.97	51	4	4	Carbamidomethylation; Deamidation (NQ)	63900000	63800000	67800000	183000000	195000000	204000000	56900000	56700000	61400000	166000000	170000000	178000000	1.00:1.00:1.08:2.91:2.99:3.12	65200000	194000000	58300000	171000000	1.00:2.94	0.340136		12784
P62908	40S ribosomal protein S3	200	64	15	15	Carbamidomethylation	239000000	231000000	237000000	891000000	914000000	948000000	90500000	92500000	92800000	371000000	365000000	369000000	1.00:1.02:1.03:4.10:4.03:4.08	236000000	918000000	91900000	368000000	1.00:4.01	0.249377		26674
P62911	60S ribosomal protein L32	200	17	2	2	Carbamidomethylation	30200000	26200000	30000000	105000000	94000000	108000000	30200000	26200000	30000000	105000000	94000000	108000000	1.00:0.87:0.99:3.49:3.11:3.58	28800000	103000000	28800000	103000000	1.00:3.56	0.280899		15860
P62918	60S ribosomal protein L8	113.66	26	6	6	Carbamidomethylation	77200000	87600000	82200000	217000000	216000000	225000000	71900000	81900000	76300000	193000000	198000000	210000000	1.00:1.14:1.06:2.68:2.75:2.93	82300000	219000000	76700000	200000000	1.00:2.61	0.383142		28025
P62962	Profilin-1	73.61	49	5	5	Deamidation (NQ)	107000000	97200000	101000000	55400000	53400000	40700000	87600000	78800000	84100000	40000000	40400000	36800000	1.00:0.90:0.96:0.46:0.46:0.42	102000000	52900000	83500000	39100000	1.00:0.47	2.12766		14957
P62983	Ubiquitin-40S ribosomal protein S27a	200	51	6	6	Carbamidomethylation	292000000	282000000	314000000	982000000	930000000	955000000	234000000	228000000	254000000	791000000	759000000	786000000	1.00:0.97:1.09:3.38:3.24:3.36	296000000	956000000	239000000	778000000	1.00:3.26	0.306748		17951
P63024	Vesicle-associated membrane protein 3	34.14	23	2	2		12700000	11400000	11000000	7240000	5290000	7460000	10400000	9920000	9920000	4110000	3550000	5530000	1.00:0.95:0.95:0.40:0.34:0.53	11700000	6660000	10100000	4400000	1.00:0.44	2.27273		11480
P63028	Translationally-controlled tumor protein	100.72	16	2	2	Carbamidomethylation	64100000	57700000	59500000	27500000	21100000	25100000	64100000	57700000	59500000	27500000	21100000	25100000	1.00:0.90:0.93:0.43:0.33:0.39	60400000	24600000	60400000	24600000	1.00:0.41	2.43902		19462
P63037	DnaJ homolog subfamily A member 1	200	17	4	4	Deamidation (NQ)	4050000	3170000	3490000	12000000	13000000	11000000	3750000	2890000	3170000	10400000	11200000	9330000	1.00:0.77:0.84:2.76:3.00:2.49	3570000	12000000	3270000	10300000	1.00:3.15	0.31746		44868
P63038	60 kDa heat shock protein mitochondrial	200	15	5	5		38300000	37200000	40500000	1160000	1770000	1460000	33200000	32400000	35400000	1010000	1620000	1300000	1.00:0.98:1.07:0.03:0.05:0.04	38700000	1500000	33700000	1350000	1.00:0.04	25		60956
P63101	14-3-3 protein zeta/delta	120.56	52	10	8	Carbamidomethylation; Deamidation (NQ)	412000000	386000000	416000000	137000000	138000000	141000000	259000000	233000000	263000000	93900000	94000000	92500000	1.00:0.90:1.02:0.36:0.36:0.36	404000000	139000000	252000000	93500000	1.00:0.37	2.7027		27771
P63242	Eukaryotic translation initiation factor 5A-1	89.7	71	7	7	Carbamidomethylation; Deamidation (NQ)	40200000	43800000	38400000	15400000	16100000	17300000	29300000	30000000	26200000	12600000	11400000	12700000	1.00:1.03:0.89:0.43:0.39:0.43	40800000	16400000	28500000	12200000	1.00:0.43	2.32558		16832
P63276	40S ribosomal protein S17	91.82	50	6	6	Carbamidomethylation; Oxidation (M)	82400000	78500000	83500000	202000000	187000000	203000000	58100000	55000000	59600000	136000000	128000000	142000000	1.00:0.95:1.03:2.35:2.21:2.44	81500000	197000000	57600000	136000000	1.00:2.35	0.425532		15524
P63280	SUMO-conjugating enzyme UBC9	45.03	26	2	2	Carbamidomethylation; Pyro-glu from Q	2460000	2200000	2410000	579000	540000	495000	2460000	2200000	2410000	579000	540000	495000	1.00:0.90:0.98:0.24:0.22:0.20	2360000	538000	2360000	538000	1.00:0.23	4.34783		18007
P63321	Ras-related protein Ral-A	110.76	45	7	2		29300000	25700000	25300000	6220000	11900000	13000000	29300000	25700000	25300000	6220000	11900000	13000000	1.00:0.87:0.86:0.21:0.41:0.44	26800000	10400000	26800000	10400000	1.00:0.39	2.5641		23553
P63325	40S ribosomal protein S10	67.96	24	4	4		42000000	36200000	40400000	87900000	83700000	82300000	36500000	30800000	33500000	73200000	68400000	66900000	1.00:0.84:0.92:2.00:1.87:1.83	39500000	86100000	33600000	70900000	1.00:2.11	0.473934		18916
P68037	Ubiquitin-conjugating enzyme E2 L3	46.66	38	3	3	Carbamidomethylation	15700000	14400000	14000000	3740000	4360000	4930000	15700000	14400000	14000000	3740000	4360000	4930000	1.00:0.92:0.90:0.24:0.28:0.31	14700000	4340000	14700000	4340000	1.00:0.30	3.33333		17862
P68040	Receptor of activated protein C kinase 1	200	61	12	12	Carbamidomethylation; Deamidation (NQ)	66600000	60300000	70100000	274000000	255000000	291000000	22700000	20200000	27500000	109000000	105000000	114000000	1.00:0.89:1.21:4.79:4.64:5.01	65600000	273000000	23500000	109000000	1.00:4.66	0.214592		35077
P68254	14-3-3 protein theta	109.67	43	10	8	Carbamidomethylation	93200000	79200000	83500000	31100000	28700000	32100000	71500000	59700000	62500000	25400000	24300000	25800000	1.00:0.84:0.87:0.36:0.34:0.36	85300000	30900000	64600000	25400000	1.00:0.39	2.5641		27778
P68368	Tubulin alpha-4A chain	200	47	14	2	Carbamidomethylation; Pyro-glu from Q	1280000	1270000	867000	10100000	10000000	11700000	1280000	1270000	867000	10100000	10000000	11700000	1.00:0.99:0.68:7.90:7.84:9.13	1140000	10600000	1140000	10600000	1.00:9.32	0.107296		49924
P68372	Tubulin beta-4B chain	151.76	56	16	2	Carbamidomethylation; Oxidation (M); Deamidation (NQ)	7650000	9140000	9350000	26500000	25300000	28200000	7650000	9140000	9350000	26500000	25300000	28200000	1.00:1.19:1.22:3.46:3.31:3.69	8710000	26700000	8710000	26700000	1.00:3.06	0.326797		49831
P68510	14-3-3 protein eta	96.47	29	6	4	Carbamidomethylation; Pyro-glu from Q	30900000	27200000	28600000	9640000	12300000	12300000	26300000	23600000	24500000	8470000	10800000	11600000	1.00:0.90:0.93:0.32:0.41:0.44	28900000	11600000	24800000	10300000	1.00:0.42	2.38095		28212
P70349	Histidine triad nucleotide-binding protein 1	100.99	27	2	2	Carbamidomethylation	13600000	12200000	11800000	3770000	5350000	6140000	13600000	12200000	11800000	3770000	5350000	6140000	1.00:0.89:0.87:0.28:0.39:0.45	12500000	5530000	12500000	5530000	1.00:0.44	2.27273		13777
P70670	Nascent polypeptide-associated complex subunit alpha muscle-specific form	145.74	3	4	4		49100000	49300000	51000000	15700000	15900000	16300000	44300000	44700000	47200000	14700000	15100000	15700000	1.00:1.01:1.06:0.33:0.34:0.35	49800000	16000000	45400000	15200000	1.00:0.33	3.0303		220497
P80313	T-complex protein 1 subunit eta	106.79	46	18	18	Carbamidomethylation; Pyro-glu from Q; Deamidation (NQ)	113000000	110000000	118000000	313000000	301000000	310000000	59000000	55900000	60900000	153000000	148000000	145000000	1.00:0.95:1.03:2.58:2.50:2.46	115000000	308000000	58600000	148000000	1.00:2.53	0.395257		59652
P80314	T-complex protein 1 subunit beta	153.53	58	22	22	Carbamidomethylation; Pyro-glu from Q	140000000	131000000	138000000	396000000	386000000	406000000	45500000	45800000	47200000	155000000	132000000	140000000	1.00:1.01:1.04:3.41:2.91:3.07	136000000	396000000	46200000	143000000	1.00:3.09	0.323625		57477
P80315	T-complex protein 1 subunit delta	108.3	58	20	20	Carbamidomethylation; Oxidation (M); Deamidation (NQ)	146000000	133000000	151000000	372000000	372000000	365000000	60600000	57100000	63900000	151000000	155000000	157000000	1.00:0.94:1.06:2.50:2.55:2.60	143000000	370000000	60500000	154000000	1.00:2.55	0.392157		58066
P80316	T-complex protein 1 subunit epsilon	200	52	18	18	Carbamidomethylation; Pyro-glu from Q; Deamidation (NQ)	96100000	90200000	85700000	287000000	293000000	301000000	45600000	36100000	32000000	146000000	140000000	146000000	1.00:0.79:0.70:3.20:3.07:3.20	90700000	293000000	37900000	144000000	1.00:3.80	0.263158		59624
P80317	T-complex protein 1 subunit zeta	200	41	16	13	Carbamidomethylation; Pyro-glu from Q; Deamidation (NQ)	97400000	105000000	110000000	292000000	280000000	313000000	31400000	40500000	40700000	129000000	125000000	135000000	1.00:1.29:1.30:4.12:3.97:4.28	104000000	295000000	37600000	130000000	1.00:3.45	0.289855		58004
P80318	T-complex protein 1 subunit gamma	117.44	49	20	20	Carbamidomethylation	141000000	138000000	152000000	405000000	434000000	462000000	56100000	57700000	55100000	123000000	156000000	169000000	1.00:1.03:0.98:2.20:2.78:3.02	144000000	436000000	56300000	150000000	1.00:2.66	0.37594		60630
P84099	60S ribosomal protein L19	125.34	14	4	4	Deamidation (NQ)	59100000	67500000	63700000	180000000	169000000	182000000	57100000	65000000	62200000	172000000	161000000	173000000	1.00:1.14:1.09:3.01:2.83:3.04	63500000	177000000	61400000	169000000	1.00:2.75	0.363636		23466
P97300	Neuroplastin	200	14	4	4	Carbamidomethylation; Oxidation (M)	45300000	43600000	46500000	15000000	11200000	14600000	41100000	40000000	42300000	13200000	9150000	12500000	1.00:0.97:1.03:0.32:0.22:0.30	45200000	13600000	41100000	11600000	1.00:0.28	3.57143		44373
P97315	Cysteine and glycine-rich protein 1	89.95	18	2	2	Carbamidomethylation	3360000	3160000	3500000	893000	1120000	674000	3360000	3160000	3500000	893000	1120000	674000	1.00:0.94:1.04:0.27:0.33:0.20	3340000	895000	3340000	895000	1.00:0.27	3.7037		20583
P97351	40S ribosomal protein S3a	200	43	10	10	Carbamidomethylation; Oxidation (M)	130000000	127000000	133000000	462000000	466000000	452000000	84100000	78900000	87000000	286000000	287000000	277000000	1.00:0.94:1.03:3.40:3.42:3.30	130000000	460000000	83300000	284000000	1.00:3.41	0.293255		29885
P97370	Sodium/potassium-transporting ATPase subunit beta-3	200	31	6	6	Carbamidomethylation; Pyro-glu from Q	84500000	77700000	90600000	23600000	22600000	22700000	64800000	60200000	72100000	18700000	18000000	17200000	1.00:0.93:1.11:0.29:0.28:0.27	84200000	23000000	65700000	18000000	1.00:0.27	3.7037		31776
P97447	Four and a half LIM domains protein 1	61.05	36	7	7	Carbamidomethylation; Pyro-glu from Q	19700000	20300000	18900000	9550000	8400000	8750000	13100000	13600000	12100000	6900000	6760000	5740000	1.00:1.04:0.93:0.53:0.52:0.44	19600000	8900000	12900000	6470000	1.00:0.50	2		31889
P97461	40S ribosomal protein S5	105.48	36	6	6	Carbamidomethylation; Deamidation (NQ)	39600000	36300000	39000000	94400000	92100000	93800000	32000000	29000000	31700000	82000000	75100000	76200000	1.00:0.91:0.99:2.56:2.35:2.38	38500000	93400000	30900000	77800000	1.00:2.52	0.396825		22889
P97855	Ras GTPase-activating protein-binding protein 1	200	9	3	3		7360000	8500000	8330000	2170000	1760000	2210000	7360000	8500000	8330000	2170000	1760000	2210000	1.00:1.16:1.13:0.30:0.24:0.30	8070000	2050000	8070000	2050000	1.00:0.25	4		51829
P99024	Tubulin beta-5 chain	130.58	54	16	2	Carbamidomethylation; Oxidation (M); Deamidation (NQ)	33900000	30500000	31800000	86000000	84300000	100000000	33900000	30500000	31800000	86000000	84300000	100000000	1.00:0.90:0.94:2.53:2.49:2.96	32100000	90200000	32100000	90200000	1.00:2.81	0.355872		49671
P99029	Peroxiredoxin-5 mitochondrial	200	19	2	2	Carbamidomethylation	2620000	2350000	2710000	490000	726000	640000	2620000	2350000	2710000	490000	726000	640000	1.00:0.89:1.03:0.19:0.28:0.24	2560000	618000	2560000	618000	1.00:0.24	4.16667		21897
Q01768	Nucleoside diphosphate kinase B	200	50	6	3	Carbamidomethylation	104000000	103000000	103000000	21400000	24500000	22700000	104000000	103000000	103000000	21400000	24500000	22700000	1.00:0.99:0.99:0.21:0.24:0.22	104000000	22900000	104000000	22900000	1.00:0.22	4.54545		17363
Q05816	Fatty acid-binding protein 5	200	31	4	4	Carbamidomethylation	20000000	17200000	22600000	6630000	6240000	4280000	17500000	17200000	20200000	5950000	5570000	4280000	1.00:0.98:1.15:0.34:0.32:0.24	20700000	5940000	18300000	5270000	1.00:0.29	3.44828		15137
Q11011	Puromycin-sensitive aminopeptidase	88.85	4	2	2	Carbamidomethylation	3130000	2450000	2700000	901000	1360000	364000	3130000	2450000	2700000	901000	1360000	364000	1.00:0.78:0.86:0.29:0.43:0.12	2760000	1130000	2760000	1130000	1.00:0.41	2.43902		103325
Q3TXS7	26S proteasome non-ATPase regulatory subunit 1	101.99	24	15	15	Carbamidomethylation; Pyro-glu from Q	16000000	15100000	15000000	35100000	37300000	38400000	7410000	6630000	6990000	16200000	17700000	18100000	1.00:0.90:0.94:2.19:2.40:2.44	15500000	37300000	7010000	17300000	1.00:2.47	0.404858		105730
Q3U1J4	DNA damage-binding protein 1	64.83	4	3	3		5490000	5150000	6060000	3180000	2560000	2480000	5490000	5150000	6060000	3180000	2560000	2480000	1.00:0.94:1.10:0.58:0.47:0.45	5560000	2740000	5560000	2740000	1.00:0.49	2.04082		126853
Q3U7R1	Extended synaptotagmin-1	200	11	7	7		45800000	43600000	46800000	5990000	5440000	5550000	38200000	35900000	38400000	4640000	4180000	4310000	1.00:0.94:1.00:0.12:0.11:0.11	45400000	5700000	37500000	4380000	1.00:0.12	8.33333		121553
Q3UDE2	Tubulin--tyrosine ligase-like protein 12	200	10	5	5		5330000	3360000	3660000	15300000	14700000	15400000	4580000	2670000	2880000	13000000	12100000	12600000	1.00:0.58:0.63:2.84:2.64:2.76	4120000	15100000	3380000	12600000	1.00:3.72	0.268817		74043
Q3UH60	Disco-interacting protein 2 homolog B	200	4	3	3	Pyro-glu from Q	626000	559000	596000	3110000	1950000	2940000	626000	559000	596000	3110000	1950000	2940000	1.00:0.89:0.95:4.96:3.11:4.70	594000	2670000	594000	2670000	1.00:4.49	0.222717		171125
Q5SUF2	Luc7-like protein 3	200	7	2	2		1700000	1320000	1390000	4710000	4640000	5210000	1700000	1320000	1390000	4710000	4640000	5210000	1.00:0.78:0.82:2.78:2.74:3.08	1470000	4850000	1470000	4850000	1.00:3.30	0.30303		51450
Q60634	Flotillin-2	87.23	14	4	4	Pyro-glu from Q	4720000	4200000	4290000	1780000	1870000	2340000	3810000	3360000	3560000	1520000	1400000	1750000	1.00:0.88:0.94:0.40:0.37:0.46	4400000	1990000	3580000	1560000	1.00:0.43	2.32558		47038
Q60767	Lymphocyte antigen 75	200	3	3	3		4340000	4020000	4280000	882000	817000	1290000	4340000	4020000	4280000	882000	817000	1290000	1.00:0.93:0.99:0.20:0.19:0.30	4210000	996000	4210000	996000	1.00:0.24	4.16667		197351
Q60854	Serpin B6	105.18	44	11	11	Carbamidomethylation; Pyro-glu from Q	78100000	72900000	75200000	28000000	29600000	30000000	38300000	35400000	35900000	14500000	13900000	15200000	1.00:0.92:0.94:0.38:0.36:0.40	75400000	29200000	36500000	14500000	1.00:0.40	2.5		42599
Q60864	Stress-induced-phosphoprotein 1	200	17	7	7	Carbamidomethylation	44200000	39900000	43500000	9110000	9590000	9820000	27700000	24200000	26500000	5350000	5730000	5520000	1.00:0.87:0.96:0.19:0.21:0.20	42600000	10100000	26100000	6140000	1.00:0.24	4.16667		62582
Q60930	Voltage-dependent anion-selective channel protein 2	200	13	3	3	Carbamidomethylation	3060000	3290000	3700000	927000	629000	343000	3060000	3290000	3700000	927000	629000	343000	1.00:1.08:1.21:0.30:0.21:0.11	3350000	782000	3350000	782000	1.00:0.23	4.34783		31733
Q60932	Voltage-dependent anion-selective channel protein 1	200	9	2	2	Carbamidomethylation	6650000	4820000	4710000	913000	1550000	1640000	6650000	4820000	4710000	913000	1550000	1640000	1.00:0.72:0.71:0.14:0.23:0.25	5400000	1370000	5400000	1370000	1.00:0.25	4		32351
Q61001	Laminin subunit alpha-5	200	1	2	2		366000	282000	305000	2660000	2620000	2710000	366000	282000	305000	2660000	2620000	2710000	1.00:0.77:0.84:7.27:7.17:7.40	318000	2660000	318000	2660000	1.00:8.38	0.119332		404056
Q61165	Sodium/hydrogen exchanger 1	33.43	5	2	2		2550000	2410000	2090000	519000	362000	748000	2550000	2410000	2090000	519000	362000	748000	1.00:0.94:0.82:0.20:0.14:0.29	2350000	814000	2350000	814000	1.00:0.35	2.85714		91468
Q61171	Peroxiredoxin-2	88.33	26	4	4		41600000	47400000	50100000	16700000	21400000	22800000	40700000	41500000	43300000	14200000	19700000	20400000	1.00:1.02:1.06:0.35:0.48:0.50	46400000	20300000	41900000	18100000	1.00:0.43	2.32558		21779
Q61187	Tumor susceptibility gene 101 protein	200	6	2	2		951000	923000	1130000	7520000	7490000	7570000	951000	923000	1130000	7520000	7490000	7570000	1.00:0.97:1.19:7.91:7.88:7.96	1000000	7530000	1000000	7530000	1.00:7.51	0.133156		44124
Q61316	Heat shock 70 kDa protein 4	200	22	10	9	Carbamidomethylation	58100000	48800000	52900000	12600000	13600000	15500000	30600000	25600000	27500000	6460000	8180000	8990000	1.00:0.84:0.90:0.21:0.27:0.29	53300000	14000000	27900000	7880000	1.00:0.28	3.57143		94133
Q61490	CD166 antigen	123.53	8	4	4	Pyro-glu from Q	11000000	11200000	10600000	3750000	3600000	4860000	9500000	9710000	8650000	3660000	2670000	3880000	1.00:1.02:0.91:0.38:0.28:0.41	10900000	4070000	9290000	3400000	1.00:0.37	2.7027		65092
Q61553	Fascin	100.18	35	12	12	Carbamidomethylation; Pyro-glu from Q	81200000	75400000	79700000	33200000	33900000	36200000	40800000	38500000	37600000	15000000	14900000	17700000	1.00:0.94:0.92:0.37:0.37:0.43	78800000	34400000	38900000	15900000	1.00:0.41	2.43902		54508
Q61598	Rab GDP dissociation inhibitor beta	133.03	41	11	9	Carbamidomethylation	69200000	65700000	66600000	25300000	21800000	24700000	41500000	39000000	37600000	16300000	11800000	13500000	1.00:0.94:0.91:0.39:0.28:0.33	67200000	24000000	39400000	13900000	1.00:0.35	2.85714		50537
Q61656	Probable ATP-dependent RNA helicase DDX5	200	16	9	5	Carbamidomethylation; Pyro-glu from Q	8290000	8860000	9950000	30400000	29600000	29900000	7210000	7710000	8440000	25100000	24300000	23800000	1.00:1.07:1.17:3.48:3.38:3.30	9490000	29900000	8240000	24400000	1.00:2.96	0.337838		69290
Q62167	ATP-dependent RNA helicase DDX3X	200	16	8	3	Carbamidomethylation; Pyro-glu from Q	4490000	4310000	4410000	15500000	14400000	17000000	4490000	4310000	4410000	15500000	14400000	17000000	1.00:0.96:0.98:3.45:3.21:3.77	4410000	15600000	4410000	15600000	1.00:3.55	0.28169		73102
Q62188	Dihydropyrimidinase-related protein 3	200	20	8	5	Carbamidomethylation; Pyro-glu from Q; Deamidation (NQ); Phosphorylation (STY)	21900000	22500000	23600000	6200000	8310000	7640000	13200000	14100000	15100000	2850000	5120000	4490000	1.00:1.07:1.14:0.22:0.39:0.34	22700000	8070000	14100000	4850000	1.00:0.34	2.94118		61936
Q62261	Spectrin beta chain non-erythrocytic 1	113.21	5	9	9		31600000	26900000	28800000	7490000	9370000	10200000	19400000	16000000	17000000	4680000	5870000	7190000	1.00:0.82:0.87:0.24:0.30:0.37	29100000	9020000	17500000	5910000	1.00:0.34	2.94118		274221
Q62348	Translin	112.55	15	2	2		3520000	2990000	2600000	928000	886000	1010000	3520000	2990000	2600000	928000	886000	1010000	1.00:0.85:0.74:0.26:0.25:0.29	3040000	940000	3040000	940000	1.00:0.31	3.22581		26201
Q62351	Transferrin receptor protein 1	72.3	16	8	8		27400000	24100000	26300000	12500000	10900000	11700000	19100000	18300000	18600000	10000000	8230000	8210000	1.00:0.96:0.98:0.52:0.43:0.43	25900000	12000000	18700000	8820000	1.00:0.47	2.12766		85731
Q62426	Cystatin-B	134.23	33	2	2		15000000	8720000	12100000	5140000	3400000	4010000	15000000	8720000	12100000	5140000	3400000	4010000	1.00:0.58:0.80:0.34:0.23:0.27	12000000	4190000	12000000	4190000	1.00:0.35	2.85714		11046
Q62433	Protein NDRG1	33.43	8	2	2		4900000	4060000	4870000	1710000	1930000	1990000	4900000	4060000	4870000	1710000	1930000	1990000	1.00:0.83:0.99:0.35:0.39:0.41	4610000	1880000	4610000	1880000	1.00:0.41	2.43902		43009
Q62465	Synaptic vesicle membrane protein VAT-1 homolog	120.34	46	13	13	Carbamidomethylation; Pyro-glu from E; Deamidation (NQ)	157000000	149000000	153000000	61600000	53700000	60900000	72300000	71600000	74400000	28100000	23100000	29800000	1.00:0.99:1.03:0.39:0.32:0.41	153000000	60700000	72800000	28300000	1.00:0.39	2.5641		43097
Q62523	Zyxin	128.15	8	3	3	Pyro-glu from Q	6540000	5920000	5680000	2180000	2210000	2130000	6540000	5920000	5680000	2180000	2210000	2130000	1.00:0.91:0.87:0.33:0.34:0.33	6050000	2170000	6050000	2170000	1.00:0.36	2.77778		60546
Q64152	Transcription factor BTF3	200	20	2	2	Pyro-glu from Q	14400000	12300000	15600000	3200000	3610000	3630000	14400000	12300000	15600000	3200000	3610000	3630000	1.00:0.85:1.08:0.22:0.25:0.25	14100000	3550000	14100000	3550000	1.00:0.25	4		22031
Q64433	10 kDa heat shock protein mitochondrial	200	28	3	3		63200000	58600000	67600000	1580000	1590000	1740000	63200000	58600000	67600000	1580000	1590000	1740000	1.00:0.93:1.07:0.02:0.03:0.03	63100000	1630000	63100000	1630000	1.00:0.03	33.3333		10963
Q64475	Histone H2B type 1-B	200	29	3	3	Pyro-glu from Q	12700000	13700000	12800000	385000000	358000000	399000000	12700000	13700000	12800000	385000000	358000000	399000000	1.00:1.08:1.01:30.32:28.15:31.40	13100000	381000000	13100000	381000000	1.00:29.12	0.0343407		13952
Q64514	Tripeptidyl-peptidase 2	97.22	6	4	4	Carbamidomethylation; Deamidation (NQ)	3060000	3930000	4530000	2290000	1460000	603000	2920000	3520000	4190000	2200000	1370000	486000	1.00:1.21:1.43:0.75:0.47:0.17	3840000	1680000	3540000	1580000	1.00:0.45	2.22222		139878
Q64727	Vinculin	146.54	32	25	25	Carbamidomethylation; Pyro-glu from Q; Deamidation (NQ)	190000000	167000000	184000000	60000000	53500000	60200000	48000000	40500000	42700000	13700000	14600000	15400000	1.00:0.84:0.89:0.29:0.30:0.32	181000000	58700000	43700000	14500000	1.00:0.33	3.0303		116717
Q68FL6	Methionine--tRNA ligase cytoplasmic	80.78	13	6	6	Carbamidomethylation	5210000	4200000	4340000	11400000	7670000	11600000	3750000	3090000	3110000	8590000	4940000	8590000	1.00:0.82:0.83:2.29:1.32:2.29	4580000	10200000	3320000	7370000	1.00:2.22	0.45045		101431
Q69ZN7	Myoferlin	107.9	22	34	34	Carbamidomethylation	179000000	181000000	181000000	72400000	70200000	68600000	27900000	33900000	30400000	12700000	13000000	10600000	1.00:1.22:1.09:0.45:0.47:0.38	183000000	70500000	30700000	12100000	1.00:0.39	2.5641		233322
Q6A0A9	Constitutive coactivator of PPAR-gamma-like protein 1	60.13	3	2	2		1150000	532000	615000	2400000	1820000	1720000	1150000	532000	615000	2400000	1820000	1720000	1.00:0.46:0.53:2.09:1.58:1.49	766000	1980000	766000	1980000	1.00:2.58	0.387597		121646
Q6IRU2	Tropomyosin alpha-4 chain	200	30	6	6	Carbamidomethylation	181000000	148000000	166000000	19200000	16500000	20000000	123000000	104000000	110000000	12500000	10600000	13700000	1.00:0.85:0.89:0.10:0.09:0.11	165000000	18600000	112000000	12300000	1.00:0.11	9.09091		28468
Q6P4T2	U5 small nuclear ribonucleoprotein 200 kDa helicase	200	3	4	4	Carbamidomethylation	836000	965000	838000	4570000	4590000	4630000	755000	899000	780000	4360000	4390000	4420000	1.00:1.19:1.03:5.77:5.82:5.85	880000	4600000	811000	4390000	1.00:5.41	0.184843		244544
Q6P5F7	Protein tweety homolog 3	200	9	3	3		727000	435000	734000	4370000	4480000	4500000	727000	435000	734000	4370000	4480000	4500000	1.00:0.60:1.01:6.01:6.17:6.19	632000	4450000	632000	4450000	1.00:7.04	0.142045		57714
Q6P5H2	Nestin	200	7	8	8	Carbamidomethylation; Pyro-glu from Q	23100000	22200000	21100000	10100000	6680000	6920000	17800000	17100000	17500000	5090000	3010000	2980000	1.00:0.96:0.99:0.29:0.17:0.17	22200000	7960000	17500000	3690000	1.00:0.21	4.7619		207122
Q6PDI5	Proteasome adapter and scaffold protein ECM29	30.32	3	3	3		209000	170000	135000	379000	329000	440000	209000	170000	135000	379000	329000	440000	1.00:0.81:0.64:1.81:1.57:2.10	171000	382000	171000	382000	1.00:2.23	0.44843		203702
Q6Q477	Plasma membrane calcium-transporting ATPase 4	148.75	10	9	3	Deamidation (NQ)	7270000	6530000	7350000	3070000	2760000	1110000	7270000	6530000	7350000	3070000	2760000	1110000	1.00:0.90:1.01:0.42:0.38:0.15	7050000	2310000	7050000	2310000	1.00:0.33	3.0303		133068
Q6ZQ38	Cullin-associated NEDD8-dissociated protein 1	200	10	7	7		14900000	13600000	17100000	6370000	5530000	5960000	10200000	9970000	10100000	3320000	3080000	3150000	1.00:0.97:0.99:0.32:0.30:0.31	15200000	5950000	10100000	3180000	1.00:0.31	3.22581		136331
Q6ZWN5	40S ribosomal protein S9	200	34	10	10	Pyro-glu from Q; Deamidation (NQ)	156000000	131000000	138000000	631000000	626000000	664000000	82400000	69500000	77400000	346000000	327000000	334000000	1.00:0.84:0.94:4.20:3.97:4.05	142000000	640000000	76500000	336000000	1.00:4.39	0.22779		22591
Q6ZWU9	40S ribosomal protein S27	200	40	5	3	Carbamidomethylation	8330000	8380000	9200000	50800000	50900000	46500000	6480000	6720000	7420000	39500000	39400000	33500000	1.00:1.04:1.14:6.10:6.07:5.16	8640000	49400000	6870000	37500000	1.00:5.45	0.183486		9461
Q6ZWV3	60S ribosomal protein L10	200	38	8	8	Carbamidomethylation; Oxidation (M)	28300000	26300000	27900000	112000000	105000000	104000000	21800000	18400000	20100000	85400000	79800000	78800000	1.00:0.85:0.92:3.92:3.66:3.61	27700000	107000000	20100000	81300000	1.00:4.04	0.247525		24604
Q75N73	Zinc transporter ZIP14	79.24	7	2	2		2570000	2570000	2710000	1090000	1100000	1370000	2570000	2570000	2710000	1090000	1100000	1370000	1.00:1.00:1.05:0.43:0.43:0.53	2620000	1190000	2620000	1190000	1.00:0.45	2.22222		53962
Q78ZA7	Nucleosome assembly protein 1-like 4	200	13	4	3	Pyro-glu from Q	5650000	5150000	3870000	1990000	1320000	1640000	4300000	3920000	2620000	1490000	812000	1100000	1.00:0.91:0.61:0.35:0.19:0.26	5500000	1650000	4220000	1140000	1.00:0.27	3.7037		42679
Q7M6Y3	Phosphatidylinositol-binding clathrin assembly protein	120.51	6	2	2		2840000	2480000	2670000	370000	465000	421000	2840000	2480000	2670000	370000	465000	421000	1.00:0.88:0.94:0.13:0.16:0.15	2660000	419000	2660000	419000	1.00:0.16	6.25		71543
Q7TMS5	ATP-binding cassette sub-family G member 2	67.6	7	4	4		8420000	8310000	8440000	4540000	3390000	4020000	7880000	7760000	7920000	4400000	3230000	3790000	1.00:0.98:1.01:0.56:0.41:0.48	8390000	3980000	7850000	3810000	1.00:0.48	2.08333		72978
Q7TNC4	Putative RNA-binding protein Luc7-like 2	118.52	8	2	2		3730000	2410000	3250000	8620000	8270000	8180000	3730000	2410000	3250000	8620000	8270000	8180000	1.00:0.65:0.87:2.31:2.22:2.19	3130000	8350000	3130000	8350000	1.00:2.67	0.374532		46583
Q7TPR4	Alpha-actinin-1	200	32	20	10	Carbamidomethylation; Pyro-glu from Q; Deamidation (NQ)	77100000	66200000	71800000	10300000	14500000	12400000	36800000	31400000	34300000	3440000	6780000	7280000	1.00:0.85:0.93:0.09:0.18:0.20	71700000	12900000	34200000	5830000	1.00:0.17	5.88235		103068
Q7TPV4	Myb-binding protein 1A	95.99	7	6	6		2630000	1920000	2230000	11200000	10600000	11000000	1920000	1260000	1550000	8400000	7650000	8240000	1.00:0.66:0.81:4.37:3.98:4.29	2260000	10900000	1580000	8100000	1.00:5.14	0.194553		152036
Q80UG5	Septin-9	93.28	10	4	4		18700000	17300000	16400000	4980000	6930000	10200000	16600000	15500000	14700000	4490000	6150000	9100000	1.00:0.94:0.89:0.27:0.37:0.55	17500000	7480000	15600000	6700000	1.00:0.43	2.32558		65575
Q80X90	Filamin-B	104.25	24	40	36	Carbamidomethylation	198000000	194000000	204000000	55500000	55000000	61500000	29800000	30500000	33700000	8160000	7480000	10100000	1.00:1.03:1.13:0.27:0.25:0.34	200000000	58700000	31300000	8590000	1.00:0.27	3.7037		277822
Q8BG32	26S proteasome non-ATPase regulatory subunit 11	115.31	34	11	11	Carbamidomethylation	17200000	17900000	19900000	45900000	46300000	45900000	8300000	7630000	8140000	21800000	20200000	21300000	1.00:0.92:0.98:2.63:2.44:2.56	18300000	46000000	8020000	21100000	1.00:2.63	0.380228		47437
Q8BH64	EH domain-containing protein 2	200	31	10	10	Carbamidomethylation	15100000	15800000	16500000	65900000	66900000	59300000	8860000	7980000	8720000	37900000	34400000	32900000	1.00:0.90:0.98:4.28:3.89:3.72	16100000	64600000	8520000	35100000	1.00:4.12	0.242718		61175
Q8BKC5	Importin-5	200	18	12	12	Carbamidomethylation; Pyro-glu from Q; Phosphorylation (STY)	20100000	19000000	18500000	6380000	5180000	7140000	12900000	12100000	11300000	3590000	3430000	4500000	1.00:0.94:0.87:0.28:0.27:0.35	19200000	6330000	12100000	3840000	1.00:0.32	3.125		123591
Q8BMJ2	Leucine--tRNA ligase cytoplasmic	87.65	12	9	9	Pyro-glu from Q	8550000	6520000	8520000	19700000	18300000	18800000	5430000	3690000	5440000	12500000	10400000	10700000	1.00:0.68:1.00:2.30:1.91:1.97	7860000	18900000	4860000	11200000	1.00:2.30	0.434783		134192
Q8BP47	Asparagine--tRNA ligase cytoplasmic	87.5	10	6	6	Carbamidomethylation	8470000	6950000	7620000	16900000	17400000	19100000	5980000	5030000	5400000	12000000	12200000	13500000	1.00:0.84:0.90:2.01:2.05:2.26	7720000	17800000	5510000	12600000	1.00:2.28	0.438596		64279
Q8BP67	60S ribosomal protein L24	151.76	25	4	4	Carbamidomethylation; Pyro-glu from Q	35100000	37700000	40700000	111000000	112000000	119000000	29900000	32700000	35900000	98400000	97400000	106000000	1.00:1.10:1.20:3.29:3.26:3.53	37800000	114000000	32800000	100000000	1.00:3.06	0.326797		17779
Q8BTM8	Filamin-A	75.14	40	67	64	Carbamidomethylation; Pyro-glu from E; Pyro-glu from Q; Deamidation (NQ)	533000000	505000000	558000000	246000000	248000000	248000000	65200000	69800000	73400000	27600000	33700000	35400000	1.00:1.07:1.13:0.42:0.52:0.54	537000000	252000000	69500000	32300000	1.00:0.47	2.12766		281219
Q8BU30	Isoleucine--tRNA ligase cytoplasmic	90.35	9	8	8	Carbamidomethylation	9900000	8920000	8770000	21200000	16800000	21300000	5900000	4870000	5370000	12700000	12400000	12700000	1.00:0.82:0.91:2.15:2.10:2.15	9200000	19800000	5380000	12600000	1.00:2.34	0.42735		144270
Q8BVY0	Ribosomal L1 domain-containing protein 1	200	12	3	3		1120000	1060000	1010000	10200000	10500000	10600000	1120000	1060000	1010000	10200000	10500000	10600000	1.00:0.95:0.91:9.18:9.44:9.50	1060000	10500000	1060000	10500000	1.00:9.85	0.101523		50421
Q8BWM0	Prostaglandin E synthase 2	100.19	11	2	2		2670000	2720000	2540000	1130000	1100000	1000000	2670000	2720000	2540000	1130000	1100000	1000000	1.00:1.02:0.95:0.43:0.41:0.37	2640000	1080000	2640000	1080000	1.00:0.41	2.43902		43324
Q8BWY3	Eukaryotic peptide chain release factor subunit 1	80.03	14	4	4	Carbamidomethylation; Deamidation (NQ)	10100000	9810000	9830000	4060000	4650000	4050000	8550000	8310000	8350000	3690000	4190000	3520000	1.00:0.97:0.98:0.43:0.49:0.41	9920000	4250000	8400000	3800000	1.00:0.45	2.22222		49031
Q8BY89	Choline transporter-like protein 2	63.75	11	6	6	Carbamidomethylation	14600000	15600000	16000000	27400000	27500000	29600000	9320000	10200000	10700000	18900000	20500000	21600000	1.00:1.10:1.14:2.03:2.20:2.31	15400000	28200000	10100000	20300000	1.00:2.02	0.49505		80110
Q8C129	Leucyl-cystinyl aminopeptidase	143.98	7	7	7		18100000	16100000	14600000	4870000	5190000	6840000	11700000	10900000	10800000	3110000	3400000	4720000	1.00:0.93:0.92:0.27:0.29:0.40	16900000	5630000	11100000	3740000	1.00:0.34	2.94118		117304
Q8C1A5	Thimet oligopeptidase	200	5	2	2		3730000	3590000	2800000	965000	484000	664000	3730000	3590000	2800000	965000	484000	664000	1.00:0.96:0.75:0.26:0.13:0.18	3380000	1060000	3380000	1060000	1.00:0.31	3.22581		78026
Q8C1B7	Septin-11	200	9	3	2		5600000	5380000	6020000	815000	859000	1040000	5600000	5380000	6020000	815000	859000	1040000	1.00:0.96:1.07:0.15:0.15:0.19	5670000	904000	5670000	904000	1.00:0.16	6.25		49695
Q8CAY6	Acetyl-CoA acetyltransferase cytosolic	97.95	9	2	2	Carbamidomethylation	6280000	6000000	6380000	1710000	1630000	930000	6280000	6000000	6380000	1710000	1630000	930000	1.00:0.96:1.02:0.27:0.26:0.15	6220000	1420000	6220000	1420000	1.00:0.23	4.34783		41298
Q8CGC7	Bifunctional glutamate/proline--tRNA ligase	82.22	17	16	16	Carbamidomethylation	19700000	16700000	22000000	41900000	44000000	46700000	5850000	6570000	7590000	14100000	14900000	15900000	1.00:1.12:1.30:2.41:2.55:2.71	19900000	44200000	6670000	14900000	1.00:2.24	0.446429		170078
Q8CIE6	Coatomer subunit alpha	69.18	12	10	10	Carbamidomethylation	9590000	9380000	9320000	21400000	21900000	24700000	5040000	6100000	5130000	9560000	10500000	13800000	1.00:1.21:1.02:1.90:2.09:2.74	9430000	22700000	5420000	11300000	1.00:2.08	0.480769		138432
Q8QZY6	Tetraspanin-14	200	8	2	2	Carbamidomethylation	4110000	3380000	3080000	13500000	11600000	11100000	4110000	3380000	3080000	13500000	11600000	11100000	1.00:0.82:0.75:3.29:2.82:2.71	3520000	12100000	3520000	12100000	1.00:3.43	0.291545		30674
Q8R081	Heterogeneous nuclear ribonucleoprotein L	132.34	12	3	3		1360000	1450000	809000	3570000	3160000	3530000	1360000	1450000	809000	3570000	3160000	3530000	1.00:1.07:0.60:2.63:2.32:2.59	1220000	3420000	1220000	3420000	1.00:2.81	0.355872		63964
Q8R1F1	Niban-like protein 1	200	23	11	11	Carbamidomethylation; Pyro-glu from Q	58400000	60000000	63400000	19500000	12700000	16800000	32700000	28100000	28000000	9070000	8450000	9920000	1.00:0.86:0.86:0.28:0.26:0.30	60600000	16400000	29600000	9150000	1.00:0.31	3.22581		84819
Q8R366	Immunoglobulin superfamily member 8	200	4	2	2		1780000	2100000	2130000	15300000	12500000	18700000	1780000	2100000	2130000	15300000	12500000	18700000	1.00:1.18:1.19:8.61:7.04:10.48	2000000	15500000	2000000	15500000	1.00:7.75	0.129032		65011
Q8R422	CD109 antigen	125.77	15	14	14	Carbamidomethylation	32000000	28700000	33000000	12200000	10700000	12500000	12100000	11200000	11700000	4540000	4230000	3910000	1.00:0.92:0.96:0.38:0.35:0.32	31200000	11800000	11700000	4230000	1.00:0.36	2.77778		161658
Q8R5J9	PRA1 family protein 3	200	14	3	3		12200000	11100000	13700000	2570000	2350000	2470000	10300000	9490000	11800000	2200000	2010000	2060000	1.00:0.92:1.15:0.21:0.20:0.20	12300000	2470000	10500000	2090000	1.00:0.20	5		21558
Q8VBV7	COP9 signalosome complex subunit 8	156.54	24	2	2		1240000	995000	1140000	385000	556000	135000	1240000	995000	1140000	385000	556000	135000	1.00:0.80:0.92:0.31:0.45:0.11	1130000	476000	1130000	476000	1.00:0.42	2.38095		23256
Q8VDD8	WASH complex subunit 1	153.53	8	2	2		1130000	1130000	1270000	404000	324000	274000	1130000	1130000	1270000	404000	324000	274000	1.00:1.00:1.12:0.36:0.29:0.24	1180000	334000	1180000	334000	1.00:0.28	3.57143		51659
Q8VDM4	26S proteasome non-ATPase regulatory subunit 2	200	20	13	13	Carbamidomethylation; Deamidation (NQ)	12600000	12300000	12700000	48800000	44900000	49300000	6680000	5990000	6360000	22800000	20800000	23700000	1.00:0.90:0.95:3.41:3.11:3.54	12500000	47700000	6350000	22400000	1.00:3.53	0.283286		100203
Q8VDN2	Sodium/potassium-transporting ATPase subunit alpha-1	200	28	20	12	Carbamidomethylation; Pyro-glu from Q	219000000	199000000	209000000	60000000	55500000	51800000	92100000	83400000	90500000	26100000	25600000	20800000	1.00:0.91:0.98:0.28:0.28:0.23	209000000	55800000	88700000	24200000	1.00:0.27	3.7037		112982
Q8VEK3	Heterogeneous nuclear ribonucleoprotein U	200	11	5	5	Carbamidomethylation; Deamidation (NQ)	15900000	14100000	12100000	86400000	85800000	106000000	13600000	12700000	10400000	71400000	70100000	88400000	1.00:0.93:0.76:5.24:5.15:6.49	14000000	92700000	12200000	76600000	1.00:6.26	0.159744		87918
Q91W90	Thioredoxin domain-containing protein 5	200	8	2	2	Carbamidomethylation; Pyro-glu from Q	8540000	7590000	9000000	195000	260000	323000	8540000	7590000	9000000	195000	260000	323000	1.00:0.89:1.05:0.02:0.03:0.04	8380000	259000	8380000	259000	1.00:0.03	33.3333		46416
Q91YE6	Importin-9	85.51	7	3	3		3390000	3140000	3340000	1460000	1320000	1550000	3390000	3140000	3340000	1460000	1320000	1550000	1.00:0.93:0.98:0.43:0.39:0.46	3290000	1440000	3290000	1440000	1.00:0.44	2.27273		116052
Q91ZJ5	UTP--glucose-1-phosphate uridylyltransferase	82.64	17	6	6		31700000	28000000	29700000	14900000	11500000	11400000	18900000	16100000	18800000	8370000	7430000	8170000	1.00:0.85:0.99:0.44:0.39:0.43	29800000	12600000	17900000	7990000	1.00:0.45	2.22222		56979
Q920A5	Retinoid-inducible serine carboxypeptidase	26.6	7	2	2		1790000	1810000	1790000	811000	709000	975000	1790000	1810000	1790000	811000	709000	975000	1.00:1.01:1.00:0.45:0.40:0.55	1790000	832000	1790000	832000	1.00:0.46	2.17391		50965
Q920E5	Farnesyl pyrophosphate synthase	200	28	7	7	Carbamidomethylation; Pyro-glu from Q	46800000	45900000	41300000	10900000	11200000	13200000	29300000	30000000	29900000	7460000	7400000	8690000	1.00:1.03:1.02:0.26:0.25:0.30	44700000	11800000	29700000	7850000	1.00:0.26	3.84615		40582
Q921F2	TAR DNA-binding protein 43	72.14	17	3	3	Carbamidomethylation	7410000	6090000	5490000	2890000	2880000	3190000	7410000	6090000	5490000	2890000	2880000	3190000	1.00:0.82:0.74:0.39:0.39:0.43	6330000	2990000	6330000	2990000	1.00:0.47	2.12766		44548
Q921M3	Splicing factor 3B subunit 3	200	9	5	5	Carbamidomethylation	2580000	1520000	2070000	6480000	7090000	6660000	2320000	1230000	1810000	6060000	6690000	6260000	1.00:0.53:0.78:2.61:2.88:2.70	2060000	6740000	1790000	6340000	1.00:3.55	0.28169		135550
Q921M7	Protein FAM49B	200	18	4	4	Pyro-glu from Q	5810000	5590000	4630000	1430000	1550000	2070000	5150000	5060000	4130000	1220000	1370000	1850000	1.00:0.98:0.80:0.24:0.27:0.36	5350000	1770000	4780000	1560000	1.00:0.33	3.0303		36776
Q922D8	C-1-tetrahydrofolate synthase cytoplasmic	90.92	7	5	5		4530000	5950000	4400000	11400000	11000000	11700000	3290000	5070000	3400000	9090000	8980000	9490000	1.00:1.54:1.03:2.76:2.73:2.89	4960000	11400000	3920000	9190000	1.00:2.34	0.42735		101200
Q922R8	Protein disulfide-isomerase A6	200	6	2	2		28600000	24200000	30300000	1720000	2200000	1870000	28600000	24200000	30300000	1720000	2200000	1870000	1.00:0.85:1.06:0.06:0.08:0.07	27700000	1930000	27700000	1930000	1.00:0.07	14.2857		48100
Q99020	Heterogeneous nuclear ribonucleoprotein A/B	200	17	4	4		12600000	11900000	12100000	3510000	3530000	3590000	12000000	10900000	11200000	3390000	3400000	3420000	1.00:0.91:0.94:0.28:0.28:0.29	12200000	3540000	11400000	3400000	1.00:0.30	3.33333		30831
Q99K51	Plastin-3	153.53	10	4	4	Carbamidomethylation	13000000	11800000	14200000	4280000	3870000	3980000	10500000	9040000	10800000	3480000	3180000	3170000	1.00:0.86:1.03:0.33:0.30:0.30	13000000	4360000	10100000	3600000	1.00:0.36	2.77778		70742
Q99K85	Phosphoserine aminotransferase	200	24	7	7		42300000	38300000	41700000	9800000	10100000	9970000	24700000	22900000	25100000	5500000	6620000	6050000	1.00:0.93:1.02:0.22:0.27:0.25	40800000	9950000	24200000	6060000	1.00:0.25	4		40473
Q99KI0	Aconitate hydratase mitochondrial	200	5	2	2		5540000	5930000	5760000	1110000	351000	674000	5540000	5930000	5760000	1110000	351000	674000	1.00:1.07:1.04:0.20:0.06:0.12	5740000	921000	5740000	921000	1.00:0.16	6.25		85464
Q99L47	Hsc70-interacting protein	118.65	6	2	2		20100000	21600000	20900000	8200000	7310000	7920000	20100000	21600000	20900000	8200000	7310000	7920000	1.00:1.08:1.04:0.41:0.36:0.39	20900000	7810000	20900000	7810000	1.00:0.37	2.7027		41656
Q99LF4	tRNA-splicing ligase RtcB homolog	200	8	2	2		1240000	1050000	1430000	4270000	4610000	4930000	1240000	1050000	1430000	4270000	4610000	4930000	1.00:0.85:1.16:3.45:3.73:3.99	1240000	4600000	1240000	4600000	1.00:3.72	0.268817		55249
Q99LT0	Protein dpy-30 homolog	200	36	2	2		1940000	1710000	1890000	490000	470000	490000	1940000	1710000	1890000	490000	470000	490000	1.00:0.88:0.97:0.25:0.24:0.25	1850000	484000	1850000	484000	1.00:0.26	3.84615		11213
Q99MN1	Lysine--tRNA ligase	134.08	5	3	3	Carbamidomethylation	6320000	5580000	7190000	2680000	1910000	2100000	6320000	5580000	7190000	2680000	1910000	2100000	1.00:0.88:1.14:0.42:0.30:0.33	6360000	2230000	6360000	2230000	1.00:0.35	2.85714		67840
Q99NB9	Splicing factor 3B subunit 1	103.59	9	6	6		2020000	1800000	2360000	5830000	5680000	7020000	1310000	1170000	1620000	4010000	3740000	4870000	1.00:0.89:1.23:3.05:2.85:3.71	2220000	6180000	1520000	4210000	1.00:2.76	0.362319		145816
Q99P72	Reticulon-4	200	14	8	8		136000000	126000000	130000000	21600000	20700000	24800000	91600000	84400000	86700000	15100000	12000000	16200000	1.00:0.92:0.95:0.17:0.13:0.18	131000000	22400000	87500000	14500000	1.00:0.17	5.88235		126613
Q99PT1	Rho GDP-dissociation inhibitor 1	128.33	35	6	6	Carbamidomethylation	104000000	91400000	85600000	29100000	32900000	32400000	73800000	65400000	57900000	21900000	24500000	24300000	1.00:0.89:0.78:0.30:0.33:0.33	93800000	31500000	65700000	23700000	1.00:0.36	2.77778		23407
Q99PV0	Pre-mRNA-processing-splicing factor 8	200	1	2	2		1250000	1270000	1740000	5380000	4260000	4620000	1250000	1270000	1740000	5380000	4260000	4620000	1.00:1.01:1.39:4.29:3.40:3.68	1420000	4750000	1420000	4750000	1.00:3.34	0.299401		273615
Q9CPR4	60S ribosomal protein L17	200	27	5	5	Pyro-glu from Q	48200000	44600000	45200000	164000000	149000000	176000000	43300000	39000000	42900000	140000000	127000000	151000000	1.00:0.90:0.99:3.22:2.93:3.49	46800000	163000000	41700000	139000000	1.00:3.33	0.3003		21423
Q9CPU0	Lactoylglutathione lyase	200	16	2	2		13000000	9810000	10800000	2300000	2780000	3020000	13000000	9810000	10800000	2300000	2780000	3020000	1.00:0.76:0.83:0.18:0.21:0.23	11200000	2700000	11200000	2700000	1.00:0.24	4.16667		20810
Q9CQE8	RNA transcription translation and transport factor protein	51.52	12	2	2	Pyro-glu from Q	266000	398000	456000	196000	151000	98700	266000	398000	456000	196000	151000	98700	1.00:1.50:1.71:0.74:0.57:0.37	373000	149000	373000	149000	1.00:0.40	2.5		28152
Q9CQM9	Glutaredoxin-3	93.03	8	2	2	Carbamidomethylation	3950000	4100000	3860000	1230000	1340000	1700000	3950000	4100000	3860000	1230000	1340000	1700000	1.00:1.04:0.98:0.31:0.34:0.43	3970000	1420000	3970000	1420000	1.00:0.36	2.77778		37778
Q9CQW9	Interferon-induced transmembrane protein 3	102.73	42	4	3	Oxidation (M)	6950000	5820000	6530000	18500000	13800000	15100000	6500000	5550000	6160000	17400000	13400000	14400000	1.00:0.85:0.95:2.68:2.06:2.22	6430000	15800000	6070000	15100000	1.00:2.48	0.403226		14954
Q9CR16	Peptidyl-prolyl cis-trans isomerase D	200	9	3	3		8830000	8790000	8450000	638000	2630000	2610000	8830000	8790000	8450000	638000	2630000	2610000	1.00:1.00:0.96:0.07:0.30:0.30	8690000	2290000	8690000	2290000	1.00:0.26	3.84615		40743
Q9CR57	60S ribosomal protein L14	200	16	3	3	Carbamidomethylation	62400000	58000000	61300000	229000000	182000000	201000000	62400000	58000000	61300000	229000000	182000000	201000000	1.00:0.93:0.98:3.67:2.92:3.22	60600000	204000000	60600000	204000000	1.00:3.37	0.296736		23564
Q9CR60	Vesicle transport protein GOT1B	63.35	11	2	2		2950000	3040000	3290000	417000	428000	396000	2010000	2240000	2370000	334000	364000	273000	1.00:1.12:1.18:0.17:0.18:0.14	3100000	414000	2210000	324000	1.00:0.15	6.66667		15422
Q9CVB6	Actin-related protein 2/3 complex subunit 2	200	23	4	4		18700000	16800000	24100000	6770000	6090000	5840000	18700000	14200000	19600000	5150000	4370000	4360000	1.00:0.76:1.05:0.28:0.23:0.23	19800000	6230000	17500000	4630000	1.00:0.26	3.84615		34357
Q9CXP8	Guanine nucleotide-binding protein G(I)/G(S)/G(O) subunit gamma-10	200	53	2	2	Carbamidomethylation	6320000	5210000	6080000	1100000	1140000	1380000	6320000	5210000	6080000	1100000	1140000	1380000	1.00:0.82:0.96:0.17:0.18:0.22	5870000	1200000	5870000	1200000	1.00:0.21	4.7619		7229
Q9CXW3	Calcyclin-binding protein	200	13	2	2		4450000	4800000	4570000	1270000	1180000	1260000	4450000	4800000	4570000	1270000	1180000	1260000	1.00:1.08:1.03:0.29:0.27:0.28	4600000	1230000	4600000	1230000	1.00:0.27	3.7037		26510
Q9CXW4	60S ribosomal protein L11	76.07	31	5	5	Carbamidomethylation	40400000	37200000	38500000	103000000	71000000	76000000	39600000	36300000	37700000	101000000	69900000	74700000	1.00:0.92:0.95:2.56:1.77:1.89	38700000	83200000	37800000	82000000	1.00:2.17	0.460829		20252
Q9CY58	Plasminogen activator inhibitor 1 RNA-binding protein	126.52	8	2	2	Carbamidomethylation	13800000	12400000	12600000	5080000	3910000	5010000	13800000	12400000	12600000	5080000	3910000	5010000	1.00:0.90:0.91:0.37:0.28:0.36	12900000	4670000	12900000	4670000	1.00:0.36	2.77778		44714
Q9CYI4	Putative RNA-binding protein Luc7-like 1	146.54	8	2	2		1740000	1230000	1710000	5160000	4490000	4400000	1740000	1230000	1710000	5160000	4490000	4400000	1.00:0.70:0.98:2.96:2.58:2.52	1560000	4680000	1560000	4680000	1.00:3.00	0.333333		43934
Q9CZM2	60S ribosomal protein L15	200	39	8	8	Pyro-glu from Q; Deamidation (NQ)	121000000	108000000	119000000	358000000	355000000	378000000	71500000	60900000	71600000	226000000	206000000	216000000	1.00:0.85:1.00:3.16:2.88:3.02	116000000	364000000	68000000	216000000	1.00:3.17	0.315457		24146
Q9CZN7	Serine hydroxymethyltransferase mitochondrial	200	8	3	3		15000000	11400000	11300000	2860000	2570000	1770000	15000000	11400000	11300000	2860000	2570000	1770000	1.00:0.76:0.76:0.19:0.17:0.12	12600000	2400000	12600000	2400000	1.00:0.19	5.26316		55759
Q9CZU6	Citrate synthase mitochondrial	200	8	3	3		23800000	22000000	21600000	5450000	5900000	6530000	23800000	22000000	21600000	5450000	5900000	6530000	1.00:0.92:0.91:0.23:0.25:0.27	22500000	5960000	22500000	5960000	1.00:0.27	3.7037		51737
Q9CZX7	Type 2 phosphatidylinositol 4 5-bisphosphate 4-phosphatase	129.36	21	2	2		1230000	1030000	1270000	6260000	5630000	6070000	1230000	1030000	1270000	6260000	5630000	6070000	1.00:0.84:1.03:5.10:4.58:4.94	1180000	5990000	1180000	5990000	1.00:5.08	0.19685		28038
Q9D0F9	Phosphoglucomutase-1	200	7	2	2		3850000	3220000	3830000	1050000	1120000	1080000	3850000	3220000	3830000	1050000	1120000	1080000	1.00:0.84:1.00:0.27:0.29:0.28	3630000	1120000	3630000	1120000	1.00:0.31	3.22581		61418
Q9D1C8	Vacuolar protein sorting-associated protein 28 homolog	200	13	2	2	Carbamidomethylation; Pyro-glu from Q	495000	427000	509000	3700000	3380000	3580000	495000	427000	509000	3700000	3380000	3580000	1.00:0.86:1.03:7.48:6.84:7.23	477000	3550000	477000	3550000	1.00:7.45	0.134228		25452
Q9D1D4	Transmembrane emp24 domain-containing protein 10	200	11	2	2		9490000	7810000	8350000	2160000	2120000	2140000	9490000	7810000	8350000	2160000	2120000	2140000	1.00:0.82:0.88:0.23:0.22:0.23	8550000	2140000	8550000	2140000	1.00:0.25	4		24911
Q9D379	Epoxide hydrolase 1	200	13	4	4	Carbamidomethylation	41100000	35800000	40000000	9030000	7830000	9970000	32700000	27500000	30900000	7180000	6190000	7900000	1.00:0.84:0.95:0.22:0.19:0.24	38900000	8940000	30400000	7090000	1.00:0.23	4.34783		52577
Q9D819	Inorganic pyrophosphatase	120.07	20	4	4	Carbamidomethylation	11700000	10000000	10500000	3300000	4180000	4460000	11400000	9780000	10200000	3300000	4060000	4300000	1.00:0.86:0.90:0.29:0.36:0.38	10700000	4350000	10500000	4210000	1.00:0.40	2.5		32667
Q9D8E6	60S ribosomal protein L4	200	37	16	16	Carbamidomethylation; Oxidation (M); Pyro-glu from Q; Deamidation (NQ)	190000000	185000000	199000000	751000000	671000000	739000000	65400000	64400000	66600000	258000000	236000000	273000000	1.00:0.99:1.02:3.94:3.61:4.17	192000000	720000000	65500000	255000000	1.00:3.90	0.25641		47154
Q9D8W5	26S proteasome non-ATPase regulatory subunit 12	119.16	17	5	5	Carbamidomethylation	9540000	8860000	8530000	21500000	27400000	19800000	7330000	6960000	6450000	17900000	22800000	14900000	1.00:0.95:0.88:2.44:3.10:2.03	8980000	22900000	6910000	18500000	1.00:2.68	0.373134		52895
Q9DBG3	AP-2 complex subunit beta	68.77	12	8	6	Carbamidomethylation; Deamidation (NQ)	8740000	7750000	8220000	4490000	3770000	4310000	8280000	7480000	7500000	4030000	3230000	3930000	1.00:0.90:0.91:0.49:0.39:0.48	8240000	4190000	7760000	3730000	1.00:0.48	2.08333		104583
Q9DBG6	Dolichyl-diphosphooligosaccharide--protein glycosyltransferase subunit 2	200	6	2	2		10600000	10600000	9230000	394000	449000	292000	10600000	10600000	9230000	394000	449000	292000	1.00:1.00:0.87:0.04:0.04:0.03	10200000	378000	10200000	378000	1.00:0.04	25		69063
Q9DBJ1	Phosphoglycerate mutase 1	153.53	54	9	9	Carbamidomethylation	108000000	97500000	104000000	30600000	27200000	31200000	71300000	64500000	68900000	21600000	20300000	24100000	1.00:0.90:0.97:0.30:0.28:0.34	103000000	30000000	68200000	22000000	1.00:0.32	3.125		28832
Q9DCD0	6-phosphogluconate dehydrogenase decarboxylating	200	25	8	8	Carbamidomethylation; Deamidation (NQ)	81400000	79200000	84000000	20000000	19100000	19900000	50800000	49900000	52300000	10600000	11600000	12000000	1.00:0.98:1.03:0.21:0.23:0.24	81500000	19700000	51000000	11400000	1.00:0.22	4.54545		53247
Q9DCN2	NADH-cytochrome b5 reductase 3	200	33	5	5	Carbamidomethylation	41200000	32700000	31000000	6910000	8170000	7650000	35400000	27900000	25700000	6010000	7230000	6700000	1.00:0.79:0.73:0.17:0.20:0.19	35000000	7580000	29700000	6650000	1.00:0.22	4.54545		34128
Q9DCT8	Cysteine-rich protein 2	111.7	39	3	3	Carbamidomethylation	30900000	27900000	25200000	11000000	9620000	11800000	30900000	27900000	25200000	11000000	9620000	11800000	1.00:0.90:0.81:0.36:0.31:0.38	28900000	10800000	28900000	10800000	1.00:0.37	2.7027		22727
Q9EPL8	Importin-7	63.96	3	2	2	Carbamidomethylation	1880000	1650000	1540000	798000	880000	835000	1880000	1650000	1540000	798000	880000	835000	1.00:0.88:0.82:0.42:0.47:0.44	1690000	838000	1690000	838000	1.00:0.50	2		119486
Q9EPR5	VPS10 domain-containing receptor SorCS2	59.1	2	2	2	Pyro-glu from Q	1110000	1900000	1590000	412000	458000	572000	1110000	1900000	1590000	412000	458000	572000	1.00:1.72:1.44:0.37:0.41:0.52	1540000	481000	1540000	481000	1.00:0.31	3.22581		128902
Q9EQK5	Major vault protein	200	49	28	28	Carbamidomethylation; Deamidation (NQ)	59400000	52300000	59800000	400000000	367000000	400000000	14300000	13300000	14000000	93600000	76200000	91200000	1.00:0.94:0.98:6.57:5.35:6.40	57200000	390000000	13900000	87000000	1.00:6.28	0.159236		95924
Q9EQP2	EH domain-containing protein 4	200	13	5	5	Deamidation (NQ)	7630000	7400000	8720000	39000000	31800000	39600000	6600000	6480000	7390000	28900000	22100000	30200000	1.00:0.98:1.12:4.38:3.34:4.58	7920000	36800000	6820000	27000000	1.00:3.96	0.252525		61481
Q9ERD7	Tubulin beta-3 chain	200	40	12	3	Carbamidomethylation; Oxidation (M); Deamidation (NQ)	8610000	7420000	6870000	29000000	25200000	31800000	8610000	7420000	6870000	29000000	25200000	31800000	1.00:0.86:0.80:3.36:2.93:3.70	7770000	28700000	7770000	28700000	1.00:3.69	0.271003		50419
Q9ESX5	H/ACA ribonucleoprotein complex subunit DKC1	78.42	6	2	2		827000	717000	1190000	4280000	2820000	2380000	827000	717000	1190000	4280000	2820000	2380000	1.00:0.87:1.44:5.17:3.41:2.88	911000	3160000	911000	3160000	1.00:3.47	0.288184		57402
Q9JHU4	Cytoplasmic dynein 1 heavy chain 1	100.19	18	54	54	Carbamidomethylation; Pyro-glu from Q	57500000	50300000	54100000	115000000	103000000	111000000	7280000	6740000	4590000	17800000	12200000	15600000	1.00:0.93:0.63:2.45:1.67:2.15	54900000	110000000	6240000	15400000	1.00:2.46	0.406504		532050
Q9JIZ9	Phospholipid scramblase 3	153.53	9	2	2		7720000	7390000	7230000	22300000	23600000	23200000	7720000	7390000	7230000	22300000	23600000	23200000	1.00:0.96:0.94:2.89:3.06:3.00	7450000	23000000	7450000	23000000	1.00:3.09	0.323625		31803
Q9JJ00	Phospholipid scramblase 1	84.5	9	2	2		4090000	4660000	4320000	9280000	9690000	10700000	4090000	4660000	4320000	9280000	9690000	10700000	1.00:1.14:1.06:2.27:2.37:2.61	4360000	9880000	4360000	9880000	1.00:2.27	0.440529		35914
Q9JJU8	SH3 domain-binding glutamic acid-rich-like protein	200	45	3	3	Carbamidomethylation; Pyro-glu from Q	14800000	12600000	11300000	2740000	2130000	1330000	14800000	12600000	11300000	2740000	2130000	1330000	1.00:0.85:0.76:0.18:0.14:0.09	12900000	2370000	12900000	2370000	1.00:0.18	5.55556		12811
Q9JKF1	Ras GTPase-activating-like protein IQGAP1	200	18	18	18	Carbamidomethylation; Pyro-glu from Q	123000000	113000000	124000000	30400000	24400000	27200000	47700000	42300000	46600000	13800000	8630000	10100000	1.00:0.89:0.98:0.29:0.18:0.21	120000000	27500000	45500000	10800000	1.00:0.24	4.16667		188741
Q9JM76	Actin-related protein 2/3 complex subunit 3	200	13	2	2		6440000	8790000	7990000	1930000	2150000	2330000	6440000	8790000	7990000	1930000	2150000	2330000	1.00:1.36:1.24:0.30:0.33:0.36	7740000	2140000	7740000	2140000	1.00:0.28	3.57143		20525
Q9JMH6	Thioredoxin reductase 1 cytoplasmic	200	8	3	3		12000000	11100000	11200000	1900000	1680000	2020000	12000000	11100000	11200000	1900000	1680000	2020000	1.00:0.92:0.93:0.16:0.14:0.17	11400000	1870000	11400000	1870000	1.00:0.16	6.25		67084
Q9QYB1	Chloride intracellular channel protein 4	64.88	51	9	9	Carbamidomethylation	46900000	44900000	47900000	22200000	20100000	20600000	30800000	27900000	31100000	15500000	13300000	15400000	1.00:0.90:1.01:0.50:0.43:0.50	46600000	21000000	29900000	14700000	1.00:0.49	2.04082		28729
Q9QYJ0	DnaJ homolog subfamily A member 2	106.38	17	3	3	Carbamidomethylation	4160000	4820000	5290000	10800000	12100000	13100000	4160000	4820000	5290000	10800000	12100000	13100000	1.00:1.16:1.27:2.60:2.91:3.16	4750000	12000000	4750000	12000000	1.00:2.53	0.395257		45746
Q9QZI8	Serine incorporator 1	200	7	2	2	Deamidation (NQ)	1830000	2130000	3080000	14700000	16500000	16500000	1750000	1790000	2730000	14600000	15100000	14900000	1.00:1.02:1.56:8.34:8.61:8.52	2440000	16600000	2190000	15500000	1.00:7.11	0.140647		50509
Q9R045	Angiopoietin-related protein 2	200	11	3	3	Pyro-glu from Q	678000	749000	493000	7390000	7400000	8490000	678000	749000	493000	7390000	7400000	8490000	1.00:1.10:0.73:10.90:10.91:12.51	640000	7760000	640000	7760000	1.00:12.12	0.0825083		57106
Q9R0P5	Destrin	87.53	45	6	6	Carbamidomethylation; Deamidation (NQ)	35800000	30700000	32700000	13500000	13900000	14000000	23400000	21400000	23100000	10000000	9380000	10000000	1.00:0.91:0.99:0.43:0.40:0.43	33100000	13800000	22600000	9820000	1.00:0.43	2.32558		18522
Q9R1J0	Sterol-4-alpha-carboxylate 3-dehydrogenase decarboxylating	200	9	2	2		12300000	11400000	9360000	1820000	1750000	2330000	12300000	11400000	9360000	1820000	1750000	2330000	1.00:0.93:0.76:0.15:0.14:0.19	11000000	1970000	11000000	1970000	1.00:0.18	5.55556		40686
Q9R1Q7	Proteolipid protein 2	33.39	24	2	2		35900000	37300000	39600000	15900000	12500000	14400000	35900000	37300000	39600000	15900000	12500000	14400000	1.00:1.04:1.10:0.44:0.35:0.40	37600000	14300000	37600000	14300000	1.00:0.38	2.63158		16608
Q9WTM5	RuvB-like 2	200	11	4	4	Carbamidomethylation	3050000	3180000	4290000	15300000	11400000	13800000	2500000	2110000	3160000	11800000	10900000	11700000	1.00:0.84:1.26:4.70:4.35:4.68	3510000	13500000	2590000	11400000	1.00:4.42	0.226244		51113
Q9WTQ5	A-kinase anchor protein 12	200	4	3	3		4490000	3960000	2920000	426000	646000	512000	4490000	3960000	2920000	426000	646000	512000	1.00:0.88:0.65:0.09:0.14:0.11	3790000	581000	3790000	581000	1.00:0.15	6.66667		180694
Q9WU78	Programmed cell death 6-interacting protein	200	29	18	18	Carbamidomethylation; Deamidation (NQ)	31500000	29500000	33200000	220000000	220000000	229000000	7710000	7250000	9010000	67800000	65100000	66000000	1.00:0.94:1.17:8.79:8.45:8.56	31400000	223000000	7990000	66300000	1.00:8.30	0.120482		96024
Q9WUM3	Coronin-1B	85.03	12	2	2		3970000	3720000	3730000	1710000	1730000	1590000	3970000	3720000	3730000	1710000	1730000	1590000	1.00:0.94:0.94:0.43:0.44:0.40	3810000	1680000	3810000	1680000	1.00:0.44	2.27273		53912
Q9WUM4	Coronin-1C	200	11	3	3	Carbamidomethylation	17600000	16700000	17000000	3800000	4060000	3510000	17600000	16700000	17000000	3800000	4060000	3510000	1.00:0.95:0.97:0.22:0.23:0.20	17100000	3790000	17100000	3790000	1.00:0.22	4.54545		53121
Q9WV91	Prostaglandin F2 receptor negative regulator	200	11	8	8	Carbamidomethylation	18100000	15600000	18000000	104000000	97000000	107000000	7630000	7240000	8070000	47500000	43700000	47800000	1.00:0.95:1.06:6.22:5.73:6.27	17300000	103000000	7650000	46300000	1.00:6.06	0.165017		98722
Q9WVA3	Mitotic checkpoint protein BUB3	200	10	3	3	Carbamidomethylation	1110000	1690000	988000	7610000	7040000	7400000	1110000	1690000	988000	7610000	7040000	7400000	1.00:1.51:0.89:6.83:6.32:6.64	1260000	7350000	1260000	7350000	1.00:5.82	0.171821		36955
Q9WVA4	Transgelin-2	126.5	66	11	11	Carbamidomethylation; Pyro-glu from Q	116000000	113000000	101000000	36400000	38200000	40400000	74700000	68000000	64300000	23000000	24800000	27100000	1.00:0.91:0.86:0.31:0.33:0.36	110000000	38400000	69000000	25000000	1.00:0.36	2.77778		22395
Q9WVJ2	26S proteasome non-ATPase regulatory subunit 13	77.12	14	4	4	Pyro-glu from Q	3700000	4470000	5040000	7310000	10700000	10900000	3350000	4190000	4790000	6840000	9790000	10200000	1.00:1.25:1.43:2.04:2.92:3.05	4410000	9640000	4110000	8950000	1.00:2.18	0.458716		42809
Q9WVK4	EH domain-containing protein 1	142.56	46	18	12	Carbamidomethylation; Deamidation (NQ)	38800000	36500000	35900000	92600000	108000000	115000000	15400000	15100000	14700000	42200000	45600000	45500000	1.00:0.98:0.96:2.75:2.97:2.96	37100000	109000000	15000000	44400000	1.00:2.95	0.338983		60603
Q9Z127	Large neutral amino acids transporter small subunit 1	109.03	18	5	4		10100000	8840000	9520000	3700000	3580000	3970000	9820000	8780000	9400000	3550000	3510000	3890000	1.00:0.89:0.96:0.36:0.36:0.40	9470000	3760000	9330000	3660000	1.00:0.39	2.5641		55872
Q9Z1Q9	Valine--tRNA ligase	124.74	29	21	21	Carbamidomethylation	37800000	33000000	36800000	93800000	81700000	86700000	9370000	9020000	9910000	26400000	24400000	26800000	1.00:0.96:1.06:2.82:2.60:2.87	35900000	90500000	9430000	25900000	1.00:2.74	0.364964		140215
Q9Z1Z2	Serine-threonine kinase receptor-associated protein	52.09	13	3	3	Carbamidomethylation	1840000	1910000	1740000	4010000	4350000	3760000	1840000	1910000	1740000	4010000	4350000	3760000	1.00:1.04:0.95:2.18:2.37:2.05	1830000	4040000	1830000	4040000	1.00:2.21	0.452489		38442
Q9Z204	Heterogeneous nuclear ribonucleoproteins C1/C2	200	12	3	3		2040000	3190000	3430000	20200000	20300000	22500000	2040000	3190000	3430000	20200000	20300000	22500000	1.00:1.57:1.68:9.93:9.96:11.04	2890000	21000000	2890000	21000000	1.00:7.28	0.137363		34385

## Sheet: Common protein not differential
Accession	Description	-10lgP EVS	Avg. Mass EVS	Coverage (%) EVS	Coverage (%) Sample 1 EVS	Coverage (%) Sample 2 EVS	Coverage (%) Sample 3 EVS	Area Sample 1 EVS	Area Sample 2 EVS	Area Sample 3 EVS	#Peptides EVS	#Unique EVS	#Spec Sample 1 EVS	#Spec Sample 2 EVS	#Spec Sample 3 EVS	PTM	-10lgP EXO	Coverage (%) EXO	Coverage (%) Sample 1 EXO	Coverage (%) Sample 2 EXO	Coverage (%) Sample 3 EXO	Area Sample 1 EXO	Area Sample 2 EXO	Area Sample 3 EXO	#Peptides EXO	#Unique EXO	#Spec Sample 1 EXO	#Spec Sample 2 EXO	#Spec Sample 3 EXO
Q8VDP3	[F-actin]-monooxygenase MICAL1	120.76	116785	6	4	4	4	486000	517000	449000	4	4	2	3	2	Carbamidomethylation	166.68	22	17	22	12	5100000	8520000	5740000	8	8	5	7	5
Q9CQV8	14-3-3 protein beta/alpha	268.69	28086	56	46	56	46	56800000	57300000	50800000	12	9	18	18	18	Carbamidomethylation; Oxidation (M); Pyro-glu from Q; Deamidation (NQ)	176.69	31	21	17	11	6590000	5840000	3340000	11	11	8	6	4
P51432	1-phosphatidylinositol 4 5-bisphosphate phosphodiesterase beta-3	193.93	139487	15	5	12	6	945000	4060000	2790000	12	12	4	9	7	Carbamidomethylation	259.06	71	59	66	59	112000000	108000000	76300000	15	15	14	18	14
Q8R3B1	1-phosphatidylinositol 4 5-bisphosphate phosphodiesterase delta-1	181.95	85873	21	13	14	15	3670000	3920000	3240000	9	9	6	7	6	Carbamidomethylation	171.73	12	8	6	6	1160000	757000	1140000	9	9	6	4	4
P14685	26S proteasome non-ATPase regulatory subunit 3	245.81	60718	44	41	33	35	46900000	26800000	35500000	20	20	17	14	17		315.78	77	76	77	73	232000000	270000000	244000000	18	18	19	20	21
O35226	26S proteasome non-ATPase regulatory subunit 4	197.47	40704	33	32	20	23	10400000	6850000	11600000	8	8	7	5	7	Carbamidomethylation; Deamidation (NQ)	45.44	22	9	13	0	504000	278000		2	2	1	1	0
Q8BJY1	26S proteasome non-ATPase regulatory subunit 5	144.43	55972	25	15	20	9	845000	1640000	2230000	7	7	3	5	3	Pyro-glu from Q	277.96	41	38	35	29	16400000	7990000	38000000	18	4	30	25	21
Q99JI4	26S proteasome non-ATPase regulatory subunit 6	187.71	45536	31	25	28	29	17700000	18700000	19000000	10	10	10	14	12		57.67	11	4	11	4	874000	1560000	704000	2	2	1	2	1
Q9CX56	26S proteasome non-ATPase regulatory subunit 8	142.82	39930	29	29	23	14	21000000	22800000	20500000	9	9	10	6	6	Carbamidomethylation	94.88	26	12	19	5	311000	183000		4	2	2	3	1
Q921H8	3-ketoacyl-CoA thiolase A peroxisomal	94.37	43953	8	8	5	8	454000	163000	378000	2	2	2	2	2	Deamidation (NQ)	317.68	77	71	77	72	72300000	80600000	69900000	16	16	18	21	17
P63323	40S ribosomal protein S12	132.65	14525	42	42	42	28	21800000	22600000	18200000	5	5	5	5	4	Carbamidomethylation	219.58	45	39	34	34	25700000	25500000	14300000	15	13	14	11	14
Q9CZX8	40S ribosomal protein S19	167.77	16085	31	31	31	31	194000000	177000000	173000000	7	7	10	10	10		154.25	31	8	19	16	1020000	1100000	2290000	7	7	2	5	4
Q9CQR2	40S ribosomal protein S21	110.75	9141	28	28	17	17	1280000	1330000	3680000	2	2	2	1	2	Carbamidomethylation	117.12	44	21	36	31	810000	2180000	992000	3	3	2	2	2
P62862	40S ribosomal protein S30	76.69	6648	19	17	17	19	8470000	8310000	8610000	2	2	1	1	2		233.61	56	52	47	56	2970000	3220000	5170000	11	2	11	12	16
P62867	40S ribosomal protein S30	76.69	6648	19	17	17	19	8470000	8310000	8610000	2	2	1	1	2		131.44	36	36	36	24	4930000	7530000	5620000	3	3	4	4	3
P62082	40S ribosomal protein S7	209.65	22127	52	52	47	52	165000000	157000000	173000000	10	10	11	8	14	Deamidation (NQ)	243.36	46	42	42	38	27600000	38300000	38000000	15	15	15	14	17
Q9JM14	5'(3')-deoxyribonucleotidase cytosolic type	127.58	23076	36	29	29	12	2060000	1120000	1180000	4	4	4	3	2		159.94	11	5	4	8	2990000	2080000	3430000	8	8	5	4	7
P70290	55 kDa erythrocyte membrane protein	155.02	52227	24	21	19	22	3730000	6540000	4950000	7	7	6	5	6	Carbamidomethylation	198.89	40	29	26	24	13500000	7150000	10300000	9	9	7	7	5
O54950	5'-AMP-activated protein kinase subunit gamma-1	111.15	37520	12	9	9	9	416000	878000	723000	3	3	3	3	3		204.99	20	13	16	11	6820000	8330000	8740000	6	6	5	4	3
P47955	60S acidic ribosomal protein P1	199.34	11475	68	67	67	68	160000000	161000000	169000000	7	7	6	7	7	Carbamidomethylation; Oxidation (M); Deamidation (NQ)	151.79	21	14	16	14	1830000	7040000	2190000	5	5	3	4	3
P99027	60S acidic ribosomal protein P2	304.21	11651	89	86	89	89	288000000	265000000	275000000	17	17	20	19	23	Oxidation (M); Deamidation (NQ)	234.95	25	16	15	17	20400000	13100000	18100000	18	18	13	11	12
P67984	60S ribosomal protein L22	157.34	14759	51	39	19	51	29400000	24100000	36800000	4	4	3	2	4	Carbamidomethylation	200.57	42	42	42	42	29000000	34100000	36200000	6	6	7	6	8
Q9D7S7	60S ribosomal protein L22-like 1	101.46	14467	30	30	10	30	417000	426000	1550000	2	2	2	1	2		151.06	30	12	23	30	2210000	2100000	3970000	7	7	4	5	8
P62751	60S ribosomal protein L23a	166.41	17695	44	37	44	34	77900000	75500000	71400000	8	8	9	9	7		198.31	57	39	57	49	14800000	20200000	13900000	10	7	9	10	9
P61255	60S ribosomal protein L26	96.5	17258	26	26	26	26	38400000	38400000	41900000	4	4	5	4	5	Deamidation (NQ)	71	15	6	15	15	1030000	1130000	1310000	2	2	1	2	2
P62900	60S ribosomal protein L31	115.84	14463	31	18	18	24	59500000	40800000	44400000	4	4	2	3	4		79.97	20	19	20	20	20600000	1610000	20700000	4	4	3	2	4
Q6ZWV7	60S ribosomal protein L35	113.48	14553	27	27	26	27	46700000	40900000	60100000	4	4	5	5	6	Pyro-glu from Q	98.46	23	16	14	8	7860000	4730000	3550000	5	5	3	3	2
P61514	60S ribosomal protein L37a	126.4	10275	41	41	28	28	32100000	31900000	32200000	3	3	6	4	3	Carbamidomethylation; Deamidation (NQ)	124.72	22	22	22	22	51500000	48700000	53400000	4	4	5	5	6
Q9JJI8	60S ribosomal protein L38	99.12	8204	50	17	36	47	5000000	5370000	4070000	5	5	2	4	4		115.55	16	7	6	7	1090000	1210000	684000	6	6	3	3	2
P51410	60S ribosomal protein L9	230.49	21881	55	48	55	52	35100000	36100000	38700000	9	9	7	9	11	Carbamidomethylation; Deamidation (NQ)	194.14	28	11	18	21	15200000	16400000	19900000	9	9	4	6	8
Q9CQ60	6-phosphogluconolactonase	174.19	27254	37	15	31	31	3360000	7450000	7730000	5	5	3	5	5		130.52	21	19	19	16	12500000	4120000	4350000	4	4	4	3	3
Q8CBW3	Abl interactor 1	160.89	52288	20	12	19	13	611000	4390000	4060000	6	4	5	8	5	Carbamidomethylation; Oxidation (M); Deamidation (NQ)	78.91	8	4	4	4	179000	320000	874000	2	2	1	1	1
P60710	Actin cytoplasmic 1	390.15	41737	82	77	81	81	2170000000	2470000000	1960000000	41	18	68	70	72	Carbamidomethylation; Oxidation (M); Pyro-glu from E; Pyro-glu from Q; Deamidation (NQ)	210.64	30	22	25	28	19600000	15700000	20300000	11	11	10	10	12
P63260	Actin cytoplasmic 2	390.15	41793	82	77	81	81	2170000000	2470000000	1960000000	41	18	68	70	72	Carbamidomethylation; Oxidation (M); Pyro-glu from E; Pyro-glu from Q; Deamidation (NQ)	130.09	28	10	12	13	1940000	115000	3560000	8	5	3	3	4
Q9QZB7	Actin-related protein 10	174.21	46208	29	22	17	17	1710000	1500000	1450000	7	7	6	5	5	Carbamidomethylation	63.3	9	5	0	4	1250000		0	2	2	1	0	1
P61161	Actin-related protein 2	254.25	44761	41	35	34	34	25800000	33400000	35000000	13	13	14	16	16	Carbamidomethylation; Oxidation (M); Deamidation (NQ)	131.44	36	36	36	24	4930000	7530000	5620000	3	3	4	4	3
Q9WV32	Actin-related protein 2/3 complex subunit 1B	260.23	41064	39	39	39	39	48800000	53300000	50400000	12	12	12	15	13	Carbamidomethylation	316.19	47	33	37	32	73600000	81000000	71600000	40	39	29	36	30
Q9CVB6	Actin-related protein 2/3 complex subunit 2	272.22	34357	59	49	39	51	43100000	38400000	43300000	16	16	16	14	17	Carbamidomethylation	93.57	19	9	9	19	308000	275000	479000	2	2	1	1	2
P59999	Actin-related protein 2/3 complex subunit 4	158.77	19667	46	34	39	34	38800000	30700000	38800000	6	6	6	6	6	Carbamidomethylation	372.08	56	47	51	48	276000000	324000000	308000000	37	36	38	45	40
Q9CPW4	Actin-related protein 2/3 complex subunit 5	166.65	16288	44	44	44	44	17000000	18400000	15800000	5	5	5	7	5	Carbamidomethylation	141.85	20	7	14	8	3000000	2830000	2790000	5	5	2	4	2
Q99JY9	Actin-related protein 3	284.42	47357	61	46	48	52	66600000	83500000	81100000	16	16	19	17	18	Carbamidomethylation; Pyro-glu from Q	116.73	29	29	29	17	1660000	1550000	0	3	2	3	4	2
Q8BK64	Activator of 90 kDa heat shock protein ATPase homolog 1	84.01	38117	10	7	10	7	1910000	2850000	1710000	2	2	1	2	1		185.33	31	15	25	16	8810000	5200000	8580000	9	9	6	7	4
P50247	Adenosylhomocysteinase	279.68	47688	50	41	42	36	68500000	70400000	68400000	17	17	17	14	15	Carbamidomethylation; Pyro-glu from Q	199.3	67	67	67	67	121000000	136000000	151000000	5	5	6	8	8
P46664	Adenylosuccinate synthetase isozyme 2	160.63	50021	24	16	22	17	9810000	12400000	8560000	8	8	8	7	6	Carbamidomethylation	146.02	24	21	15	22	4020000	3010000	3900000	5	5	4	3	5
P61750	ADP-ribosylation factor 4	231.38	20397	52	47	52	47	432000	3630000	424000	7	2	10	10	10	Carbamidomethylation; Oxidation (M)	96.72	17	12	6	5	2190000	538000	0	3	3	2	1	1
P62331	ADP-ribosylation factor 6	113.8	20082	39	39	34	15	4060000	4840000	805000	4	4	5	3	1	Carbamidomethylation	148.48	41	41	24	24	14100000	13800000	8050000	5	5	4	3	2
P61211	ADP-ribosylation factor-like protein 1	89.22	20412	22	22	9	0	1520000	321000		2	2	3	2	0		243.12	38	31	29	31	16200000	14700000	14700000	10	3	8	7	10
Q9D0J4	ADP-ribosylation factor-like protein 2	48.27	20864	17	0	17	17		310000	300000	2	2	0	2	0	Carbamidomethylation; Pyro-glu from Q	135.42	14	4	14	4	1060000	1700000	1100000	3	3	2	3	1
Q8BGQ7	Alanine--tRNA ligase cytoplasmic	253.11	106908	27	15	19	15	10100000	20400000	17000000	17	17	10	17	11	Carbamidomethylation; Pyro-glu from Q	95.87	11	8	3	2	2490000	1270000	498000	5	5	3	2	1
P28474	Alcohol dehydrogenase class-3	182.92	39548	29	27	27	27	10200000	9290000	5940000	7	7	6	9	7	Carbamidomethylation	95.16	16	5	5	10	46500	66500	836000	3	3	1	1	2
Q571I9	Aldehyde dehydrogenase family 16 member A1	106.71	84756	8	8	4	1	1850000	701000	513000	5	5	5	2	1	Carbamidomethylation	153.2	8	5	5	6	1810000	1230000	998000	6	6	6	4	5
P45376	Aldose reductase	196.05	35732	38	28	35	28	35800000	39900000	44700000	10	10	8	11	10	Carbamidomethylation	138.72	14	14	14	14	8920000	5960000	0	4	2	5	2	3
P45377	Aldose reductase-related protein 2	135.68	36121	23	23	19	12	5620000	3820000	2180000	4	4	5	4	2	Carbamidomethylation	135.84	33	20	26	33	18400000	16100000	23400000	8	8	5	6	9
P61164	Alpha-centractin	242.68	42614	46	31	41	25	17900000	18400000	11300000	11	4	10	12	8	Carbamidomethylation	162.22	62	32	55	52	7010000	13100000	16900000	6	6	3	5	6
P27046	Alpha-mannosidase 2	111	131631	8	4	6	2	2380000	1500000	1320000	7	7	4	5	2	Deamidation (NQ)	83.62	2	2	1	2	1380000	740000	1560000	2	2	2	1	3
Q9EPC1	Alpha-parvin	121.08	42330	12	12	4	4	2270000	1020000	781000	3	3	3	1	1		113.69	21	11	14	15	1730000	2530000	1890000	4	4	3	5	4
Q9DB05	Alpha-soluble NSF attachment protein	228.85	33190	41	32	22	16	9380000	6060000	6460000	9	9	7	6	4	Carbamidomethylation; Pyro-glu from Q	98.92	14	5	10	9	380000	443000	1350000	3	3	1	2	2
P31230	Aminoacyl tRNA synthase complex-interacting multifunctional protein 1	164.24	33997	35	17	17	18	2340000	2920000	1870000	6	6	3	3	4	Carbamidomethylation; Pyro-glu from Q; Deamidation (NQ)	304.26	48	41	45	40	47400000	51400000	36700000	21	18	22	23	20
Q8R010	Aminoacyl tRNA synthase complex-interacting multifunctional protein 2	161.12	35378	44	22	14	44	5960000	3710000	5590000	6	6	4	3	7	Carbamidomethylation	95.82	12	0	12	10		2430000	942000	3	3	0	3	2
P97449	Aminopeptidase N	297.7	109651	37	21	31	29	43200000	61000000	46500000	26	26	20	26	22	Carbamidomethylation	85.01	7	3	3	3	1130000	636000	919000	4	4	2	2	1
P97384	Annexin A11	216.39	54079	25	23	18	21	23000000	13600000	22300000	12	11	13	9	15	Carbamidomethylation; Pyro-glu from Q; Deamidation (NQ)	146.62	29	24	29	19	12800000	11600000	36300000	5	4	5	5	4
P07356	Annexin A2	362.86	38676	70	67	69	69	1260000000	1270000000	1050000000	32	32	46	44	41	Carbamidomethylation; Pyro-glu from Q; Deamidation (NQ)	131.26	40	38	32	38	15100000	14200000	14700000	4	4	4	4	4
P97429	Annexin A4	317.08	35916	70	64	65	61	182000000	202000000	194000000	29	27	28	35	29	Carbamidomethylation; Deamidation (NQ)	288.32	30	19	20	20	14400000	15400000	14600000	18	18	13	14	13
P14824	Annexin A6	395.76	75885	67	63	65	66	1110000000	1120000000	1070000000	46	44	66	63	61	Carbamidomethylation; Oxidation (M); Pyro-glu from E; Deamidation (NQ)	252.44	49	37	39	37	35400000	48500000	44100000	19	19	16	18	13
Q07076	Annexin A7	217.16	49925	28	20	17	28	44700000	53600000	52100000	12	12	9	9	13	Carbamidomethylation; Pyro-glu from Q	255.82	36	26	23	27	10800000	8260000	7050000	17	13	14	14	13
Q6P9J9	Anoctamin-6	256.49	106255	23	13	18	21	42400000	43800000	50600000	15	15	11	12	18	Carbamidomethylation; Oxidation (M); Pyro-glu from Q; Deamidation (NQ)	102.37	39	19	15	22	2850000	6070000	11000000	7	7	3	3	6
P17426	AP-2 complex subunit alpha-1	202.33	107664	22	13	16	15	3250000	3850000	3450000	14	7	8	11	10	Carbamidomethylation; Pyro-glu from Q	182.55	18	11	15	18	4400000	8070000	7210000	5	5	4	5	6
P17427	AP-2 complex subunit alpha-2	271	104016	35	27	26	29	18700000	19700000	20400000	22	15	17	17	18	Carbamidomethylation; Oxidation (M); Pyro-glu from Q	189.42	15	10	11	14	1320000	2310000	2780000	9	6	6	7	8
P84091	AP-2 complex subunit mu	183.82	49655	31	26	19	22	18200000	18600000	13200000	9	9	8	6	7	Carbamidomethylation; Pyro-glu from Q	199.51	20	9	16	14	4310000	7110000	3710000	9	9	5	8	6
Q9Z1T1	AP-3 complex subunit beta-1	86.25	122740	3	1	0	2	257000		1130000	3	3	1	0	2	Carbamidomethylation	83.39	19	13	15	9	726000	864000	242000	3	3	2	2	1
Q02013	Aquaporin-1	182.08	28793	38	38	27	23	36500000	40300000	25100000	7	7	7	8	5	Carbamidomethylation	242.48	28	15	17	14	5370000	2330000	10700000	23	23	11	12	11
Q9WTY4	Aquaporin-5	87.89	28274	10	6	6	10	2580000	2100000	2310000	2	2	1	1	2		166.26	50	29	37	21	9290000	19900000	6420000	7	7	5	8	4
Q9D0I9	Arginine--tRNA ligase cytoplasmic	243.48	75674	31	23	22	22	13000000	16500000	15900000	16	16	12	12	9	Carbamidomethylation; Deamidation (NQ)	78.09	9	6	6	4	91500	39800	247000	2	2	1	2	1
Q61024	Asparagine synthetase [glutamine-hydrolyzing]	106.83	64283	18	2	3	17	1660000	2390000	4390000	6	6	1	2	5	Carbamidomethylation	127.67	20	13	5	6	3670000	976000	673000	7	7	6	2	2
Q922B2	Aspartate--tRNA ligase cytoplasmic	121.45	57147	25	17	10	16	10300000	15300000	7040000	10	10	7	4	6	Carbamidomethylation; Pyro-glu from Q	74.37	8	4	4	0	785000	497000		2	2	1	1	0
Q9Z2W0	Aspartyl aminopeptidase	247.23	52207	40	32	34	37	20700000	25600000	27600000	11	11	9	10	10	Carbamidomethylation; Deamidation (NQ)	262.11	74	51	70	51	50000000	71300000	73400000	12	12	11	13	10
P28658	Ataxin-10	118.34	53707	16	9	9	6	949000	1990000	1070000	5	5	3	4	2	Carbamidomethylation	208.56	40	34	40	37	35800000	35400000	35300000	11	10	9	10	9
Q9DC29	ATP-binding cassette sub-family B member 6 mitochondrial	138.67	93770	10	8	6	7	2640000	2000000	1180000	4	4	3	2	2		267.43	53	49	47	45	35200000	38900000	44300000	15	15	13	13	13
P61222	ATP-binding cassette sub-family E member 1	137.79	67314	18	13	8	5	2950000	2610000	1960000	6	6	5	3	2	Deamidation (NQ)	111.49	9	9	4	6	504000	336000	209000	2	2	2	1	1
Q6P542	ATP-binding cassette sub-family F member 1	82.56	94945	8	0	4	3		204000	381000	4	4	0	2	2		210.77	26	15	16	24	7830000	6750000	7030000	10	10	8	8	9
Q91V92	ATP-citrate synthase	245.09	119728	23	16	15	18	22100000	23400000	24300000	17	17	17	15	18	Carbamidomethylation; Pyro-glu from Q; Deamidation (NQ)	195.67	11	7	8	5	1490000	10600000	1070000	7	7	5	5	3
Q91VR5	ATP-dependent RNA helicase DDX1	76.7	82500	10	3	2	5	0	239000	1040000	4	4	1	1	2		214.99	25	15	14	14	7940000	14600000	12500000	9	9	6	7	7
O88738	Baculoviral IAP repeat-containing protein 6	79.7	532176	1	1	0	0	249000		296000	4	4	3	0	3	Carbamidomethylation; Pyro-glu from Q; Deamidation (NQ)	105.62	15	7	10	12	2230000	4120000	2970000	4	4	2	3	3
Q9JLV1	BAG family molecular chaperone regulator 3	174.88	61860	16	16	6	5	4710000	1660000	2340000	6	6	5	2	2	Carbamidomethylation	217.18	47	33	43	41	3790000	8860000	11400000	9	4	7	9	8
O70318	Band 4.1-like protein 2	260.78	109940	26	17	19	24	16000000	15800000	21200000	21	20	15	14	19	Carbamidomethylation; Deamidation (NQ)	199.99	29	23	11	24	3580000	4200000	7730000	10	8	7	7	11
Q9WV92	Band 4.1-like protein 3	255.96	103338	29	20	23	17	23000000	27400000	6160000	19	17	15	18	12	Carbamidomethylation; Pyro-glu from Q	54.31	6	2	2	3	103000	4710	232000	3	3	1	1	1
Q9CQC6	Basic leucine zipper and W2 domain-containing protein 1	172.78	48043	27	19	25	14	3360000	4560000	2410000	7	7	7	8	6	Carbamidomethylation; Pyro-glu from Q	66.73	4	2	4	0	0	267000		3	3	1	2	0
Q8BFZ3	Beta-actin-like protein 2	287.83	42004	35	31	26	35	5860000	1540000	1510000	16	3	22	16	25	Oxidation (M); Deamidation (NQ)	57.84	3	1	3	1	58000	207000	60700	2	2	1	2	1
Q8R5C5	Beta-centractin	219.39	42281	41	34	32	23	6020000	4140000	2880000	10	3	10	9	6	Carbamidomethylation	267.2	36	25	24	26	26100000	30700000	29400000	14	14	9	12	11
Q60967	Bifunctional 3'-phosphoadenosine 5'-phosphosulfate synthase 1	79.63	70794	7	4	3	3	409000	339000	226000	2	2	1	1	1	Carbamidomethylation; Pyro-glu from Q	168.11	58	56	35	58	48700000	38500000	43700000	8	8	8	5	8
Q9CWJ9	Bifunctional purine biosynthesis protein PURH	355.13	64217	62	57	56	52	61100000	69300000	55700000	27	27	30	30	23	Carbamidomethylation	172.5	25	25	25	13	7840000	8340000	5330000	4	4	5	5	3
Q91XV3	Brain acid soluble protein 1	319.58	22087	77	66	66	66	181000000	152000000	173000000	17	17	19	17	19	Deamidation (NQ)	145.91	17	13	10	10	14400000	13500000	10500000	5	5	4	3	3
Q8K2Q7	BRO1 domain-containing protein BROX	148.71	46202	22	11	17	11	667000	3770000	597000	5	5	3	4	2		68.17	12	5	5	12	1890000	2100000	2570000	2	2	1	1	2
Q06138	Calcium-binding protein 39	67.45	39843	9	6	6	9	1630000	1710000	2440000	3	3	2	2	3		244.55	29	26	20	18	8210000	7440000	5440000	15	11	16	12	12
O08529	Calpain-2 catalytic subunit	299.22	79872	49	38	34	46	30900000	37000000	41200000	22	22	18	21	23	Carbamidomethylation	227.45	26	11	18	13	8920000	6400000	7090000	19	19	9	11	10
Q9DAW9	Calponin-3	96.38	36429	16	3	3	12	249000	1530000	3520000	4	3	1	1	3	Carbamidomethylation	99.03	13	4	6	9	21400	1120000	746000	4	4	1	2	3
Q9DBC7	cAMP-dependent protein kinase type I-alpha regulatory subunit	100.51	43185	13	9	13	6	1620000	2110000	1930000	3	3	2	3	2		99.19	30	30	30	10	350000	1260000	483000	2	2	2	2	1
P08074	Carbonyl reductase [NADPH] 2	84.18	25958	19	19	19	11	154000	156000	105000	2	2	2	2	1		345.68	66	66	64	58	643000000	627000000	514000000	27	27	39	37	32
O89001	Carboxypeptidase D	98.17	152405	6	2	5	3	947000	1860000	930000	7	7	3	5	3	Carbamidomethylation; Pyro-glu from Q	114.59	18	12	14	8	1130000	1500000	1220000	3	3	3	3	2
P26231	Catenin alpha-1	331.27	100106	51	41	40	46	38800000	50100000	47200000	27	23	25	29	28	Carbamidomethylation; Oxidation (M); Pyro-glu from E; Pyro-glu from Q; Deamidation (NQ)	437.13	40	28	26	35	54900000	64500000	87200000	61	53	41	46	59
Q61301	Catenin alpha-2	178.72	105286	12	8	5	8	1970000		5230000	8	4	6	5	6	Carbamidomethylation; Pyro-glu from Q	140.28	18	4	16	16	2140000	3760000	3360000	5	2	2	5	5
Q02248	Catenin beta-1	230.62	85471	31	22	24	15	8320000	10900000	12900000	16	12	13	14	11	Carbamidomethylation; Deamidation (NQ)	128.19	11	9	0	2	1480000		401000	6	6	5	0	1
P10605	Cathepsin B	239.58	37280	40	29	35	36	23200000	25100000	22900000	13	13	10	12	14	Carbamidomethylation; Deamidation (NQ)	267.42	21	16	12	13	28300000	24500000	25900000	21	20	17	14	15
P24668	Cation-dependent mannose-6-phosphate receptor	172.45	31172	18	14	12	15	17600000	12400000	12300000	4	4	4	3	4	Carbamidomethylation	184.27	26	17	7	16	5680000	3760000	6430000	8	8	6	3	7
O35566	CD151 antigen	77.23	28246	13	13	13	4	6930000	8340000	5410000	2	2	2	3	1	Carbamidomethylation	156.92	6	3	4	4	4840000	4650000	4260000	8	8	4	6	5
Q8VE98	CD276 antigen	139.98	34002	32	21	26	14	4980000	5770000	4620000	5	5	4	5	3	Carbamidomethylation; Pyro-glu from Q	77.31	6	0	0	6			1030000	3	3	0	0	3
P15379	CD44 antigen	216.68	85617	10	10	8	8	86600000	32000000	71400000	8	8	14	9	12	Carbamidomethylation; Oxidation (M); Deamidation (NQ)	399.63	68	61	67	63	967000000	985000000	1030000000	47	45	57	63	63
P41731	CD63 antigen	139.19	25767	25	13	25	16	13900000	16100000	3850000	4	4	3	4	3	Carbamidomethylation	95.66	16	6	16	6	847000	5930000	624000	3	3	1	3	1
P40240	CD9 antigen	153	25258	16	16	16	16	92400000	94300000	117000000	3	3	4	4	5	Carbamidomethylation; Oxidation (M)	74.78	10	2	6	2	613000	90600	131000	4	4	1	2	1
Q9Z0M6	CD97 antigen	251.75	90413	23	17	19	16	52000000	43500000	52300000	12	12	12	11	9	Carbamidomethylation; Deamidation (NQ)	67.8	5	2	0	3	1340000		689000	2	2	1	0	2
Q8VCN6	CD99 antigen	113.78	16783	45	27	45	27	1040000	1410000	1860000	5	5	3	3	5		209.49	46	33	39	41	9790000	11900000	13900000	8	8	6	7	9
P60766	Cell division control protein 42 homolog	260.72	21259	83	79	80	73	185000000	192000000	180000000	14	13	18	15	13	Carbamidomethylation; Pyro-glu from Q; Deamidation (NQ)	212.87	37	28	23	25	14400000	13500000	580000	9	6	9	6	6
Q08288	Cell growth-regulating nucleolar protein	108.5	43736	11	6	11	6	473000	1160000	446000	2	2	1	2	1		249.65	33	25	20	28	31300000	25200000	30900000	22	20	17	15	19
Q5FWI3	Cell surface hyaluronidase	124.86	153800	5	2	4	4	592000	1860000	2520000	5	5	3	3	4	Carbamidomethylation	62.96	3	1	0	2	1160000		498000	2	2	2	0	1
Q9D8B3	Charged multivesicular body protein 4b	153.35	24936	23	13	23	13	3620000	6660000	3730000	4	4	2	4	3	Pyro-glu from Q	77.64	10	10	5	5	478000	359000	310000	2	2	2	1	1
Q9D7S9	Charged multivesicular body protein 5	110.96	24576	21	12	21	12	296000	316000	327000	2	2	1	2	1		200.86	62	36	27	53	1230000	686000	994000	9	4	7	5	9
Q9Z1Q5	Chloride intracellular channel protein 1	260.73	27013	74	61	71	59	99300000	117000000	97000000	14	14	16	16	13	Carbamidomethylation	240.91	44	39	28	25	21500000	14900000	21700000	14	14	10	10	8
Q6X893	Choline transporter-like protein 1	158.4	73067	9	9	6	7	6070000	7570000	4810000	6	6	5	5	3	Carbamidomethylation; Deamidation (NQ)	192.57	13	10	9	10	16300000	14100000	14300000	9	9	7	8	8
P23198	Chromobox protein homolog 3	78.58	20855	30	14	9	7	2510000	609000	793000	4	4	3	1	1	Carbamidomethylation	262.17	24	18	15	12	33400000	37500000	24800000	25	25	20	17	15
Q58A65	C-Jun-amino-terminal kinase-interacting protein 4	143.29	146219	8	4	3	4	332000	571000	1490000	6	6	4	2	5		238.53	22	18	10	8	8780000	6280000	10300000	18	18	14	11	10
Q68FD5	Clathrin heavy chain 1	432.67	191555	56	44	43	49	295000000	272000000	318000000	74	74	71	65	82	Carbamidomethylation; Pyro-glu from Q; Deamidation (NQ)	202.86	38	30	30	26	16900000	12200000	14500000	13	13	12	11	10
O08585	Clathrin light chain A	104.41	25604	17	12	17	12	7300000	11000000	7930000	4	4	2	4	3		125.68	16	13	3	3	565000	197000	90600	4	4	3	2	2
O55029	Coatomer subunit beta'	217.07	102449	27	21	20	16	15800000	14800000	9540000	16	16	12	13	9	Carbamidomethylation; Pyro-glu from Q; Deamidation (NQ)	119.1	8	4	2	2	21300	311000	0	5	5	2	2	1
Q5XJY5	Coatomer subunit delta	138.34	57230	17	13	11	11	8320000	7230000	5820000	9	9	9	5	5	Carbamidomethylation	81.43	6	6	2	2	310000	152000	155000	2	2	2	1	1
O89079	Coatomer subunit epsilon	174.65	34567	28	24	19	23	5280000	3180000	3980000	5	5	6	4	5	Carbamidomethylation	56.77	5	0	4	1		728000	710000	3	3	0	2	1
Q9QZE5	Coatomer subunit gamma-1	253.74	97513	26	20	20	24	7390000	7060000	11100000	16	13	16	14	18	Carbamidomethylation; Pyro-glu from Q; Deamidation (NQ)	87.26	4	3	2	0	852000	133000		2	2	1	1	0
Q9JIG7	Coiled-coil domain-containing protein 22	63.86	70844	4	4	2	2	749000	509000	445000	2	2	2	2	1		201.02	20	13	9	15	4050000	3020000	3090000	11	11	8	6	9
Q91W50	Cold shock domain-containing protein E1	101.14	88791	6	4	0	4	480000		390000	3	3	2	0	2	Carbamidomethylation; Pyro-glu from Q	337.15	24	15	18	15	31500000	25000000	20500000	42	35	29	32	28
P11087	Collagen alpha-1(I) chain	171.78	138033	18	5	8	12	1730000	2120000	4410000	14	14	4	6	9	Carbamidomethylation; Pyro-glu from Q; Deamidation (NQ)	110.33	25	5	12	25			3330000	4	2	1	2	4
P08121	Collagen alpha-1(III) chain	226.38	138944	19	10	11	11	6960000	5180000	4710000	17	17	9	10	9	Carbamidomethylation; Oxidation (M); Pyro-glu from E; Pyro-glu from Q; Deamidation (NQ)	74.03	19	19	19	11	97100	113000	73700	2	2	2	2	1
Q01149	Collagen alpha-2(I) chain	205.37	129557	28	13	12	11	5210000	4460000	4950000	22	22	12	8	9	Carbamidomethylation; Deamidation (NQ)	48.09	16	0	11	5		381000	1550000	2	2	0	1	1
Q64735	Complement component receptor 1-like protein	134.18	53763	17	8	6	13	1360000	2670000	4480000	4	4	2	2	3	Carbamidomethylation	114.08	16	6	11	11	862000	612000	624000	3	3	1	2	2
Q8K2Z4	Condensin complex subunit 1	60.02	155664	2	0	2	1		130000	66700	2	2	0	2	1		180.69	17	11	12	10	5520000	3420000	2360000	7	6	5	5	4
P61202	COP9 signalosome complex subunit 2	139.64	51597	18	11	15	11	1430000	2030000	1100000	5	5	3	4	3	Carbamidomethylation; Pyro-glu from Q	212.28	27	23	27	20	10600000	11300000	9440000	7	7	8	8	6
Q9CZ04	COP9 signalosome complex subunit 7a	126.04	30224	20	20	6	15	2310000	306000	1750000	4	4	5	1	4	Carbamidomethylation; Pyro-glu from Q	173.41	32	19	23	19	3550000	5550000	3720000	6	6	5	5	4
Q8C166	Copine-1	192.48	58887	24	19	20	17	14700000	12100000	7610000	9	9	8	8	7	Carbamidomethylation	105.53	10	3	5	8	276000	281000	276000	5	5	2	2	3
Q8BT60	Copine-3	185.21	59585	30	17	14	18	7400000	7280000	9800000	9	8	7	4	6	Carbamidomethylation	153.09	19	12	8	14	1840000	1030000	1420000	7	7	5	3	5
Q04447	Creatine kinase B-type	152.15	42713	22	16	18	8	3710000	3420000	3100000	5	5	4	4	3	Carbamidomethylation; Deamidation (NQ)	175.61	38	38	27	20	28500000	25900000	7050000	5	5	6	4	3
P70698	CTP synthase 1	186.12	66683	21	13	10	17	3870000	3160000	6880000	9	9	5	5	7	Carbamidomethylation	121.01	15	15	10	15	2880000	2620000	3230000	3	3	3	2	3
Q9WTX6	Cullin-1	121.11	89691	10	7	3	6	1430000	205000	1700000	5	5	4	2	3	Pyro-glu from Q	184.09	38	38	30	26	10200000	10300000	9960000	5	5	6	7	4
Q9D1P4	Cysteine and histidine-rich domain-containing protein 1	82.83	37351	11	7	5	5	1150000	337000	688000	3	3	2	1	1	Carbamidomethylation	51.3	24	11	7	7	394000	333000	2820000	3	3	1	1	1
O88487	Cytoplasmic dynein 1 intermediate chain 2	208.12	68394	31	22	21	27	15800000	13700000	14800000	11	10	11	10	12	Carbamidomethylation; Pyro-glu from Q; Deamidation (NQ)	79.84	6	0	0	6			1060000	2	2	0	0	2
Q8R1Q8	Cytoplasmic dynein 1 light intermediate chain 1	152.27	56614	26	17	9	15	3110000	3840000	5360000	8	8	6	3	4	Carbamidomethylation; Pyro-glu from Q	185.88	31	19	23	20	5770000	6410000	4590000	9	9	7	8	6
Q6PDL0	Cytoplasmic dynein 1 light intermediate chain 2	164.03	54219	26	20	20	13	3920000	3270000	2960000	7	7	5	5	3	Carbamidomethylation	176.91	26	23	19	11	3540000	1880000	2730000	7	3	6	5	4
Q7TMB8	Cytoplasmic FMR1-interacting protein 1	226.22	145241	23	12	16	17	13200000	16300000	22200000	24	24	15	16	20	Carbamidomethylation; Pyro-glu from Q	96.34	19	19	19	19	67600000	65300000	65000000	2	2	4	4	4
Q9CPY7	Cytosol aminopeptidase	157.82	56141	32	14	23	27	5180000	10500000	12400000	12	12	5	8	11	Carbamidomethylation	176.88	31	20	23	13	6690000	3590000	8030000	8	8	6	5	5
Q91V12	Cytosolic acyl coenzyme A thioester hydrolase	171.78	42537	28	18	16	15	22700000	15600000	19900000	7	7	7	4	4		453.33	50	39	43	44	223000000	202000000	200000000	87	69	90	95	99
Q61753	D-3-phosphoglycerate dehydrogenase	197.93	56586	34	26	19	17	22500000	19700000	19600000	11	11	10	9	8	Carbamidomethylation	95.85	7	2	2	5	1850000	1610000	4030000	6	6	2	2	5
O35215	D-dopachrome decarboxylase	103.47	13077	53	22	42	20	3410000	3570000	4020000	4	4	2	3	2	Carbamidomethylation	139.75	13	4	7	13	1460000	2410000	4810000	4	4	1	2	5
Q8CJ26	Death domain-containing membrane protein NRADD	70.59	24727	10	10	5	5	278000	913000	1920000	2	2	2	1	1		87.8	9	3	7	0	450000	1890000		3	3	1	3	0
Q8R1A4	Dedicator of cytokinesis protein 7	92.02	241436	3	2	1	2	211000	81600	82100	3	3	2	1	2		90.19	5	5	2	2	747000	652000	502000	2	2	2	1	1
Q91YP3	Deoxyribose-phosphate aldolase	44.38	34975	9	0	9	9		293000	280000	2	2	0	2	0		167.69	40	40	33	26	9050000	7670000	7770000	6	5	9	6	5
P31001	Desmin	304.31	53498	53	31	40	43	44800000	78200000	87800000	24	21	23	23	30	Carbamidomethylation; Oxidation (M); Pyro-glu from E; Deamidation (NQ)	61.82	11	5	6	6	325000	2150000	1780000	2	2	1	1	1
P32233	Developmentally-regulated GTP-binding protein 1	158.6	40512	26	22	22	16	3490000	2970000	2080000	6	6	4	5	3	Carbamidomethylation	156.39	32	16	15	22	1740000	854000	1090000	5	5	3	3	3
O08553	Dihydropyrimidinase-related protein 2	327.57	62278	70	63	48	58	75600000	81600000	80500000	26	21	30	24	28	Carbamidomethylation; Oxidation (M); Pyro-glu from Q; Deamidation (NQ)	63.38	3	0	2	1		243000	122000	2	2	0	1	1
Q8BWT5	Disco-interacting protein 2 homolog A	63.7	165254	5	0	3	3		351000	1050000	3	3	0	2	2	Carbamidomethylation	113.33	11	9	11	9	3520000	8580000	3360000	3	2	2	3	3
Q61072	Disintegrin and metalloproteinase domain-containing protein 9	166.21	92080	14	13	7	10	5260000	3610000	3240000	7	7	8	5	5	Carbamidomethylation; Deamidation (NQ)	150.56	15	11	7	8	1500000	3830000	621000	7	7	5	3	3
Q811D0	Disks large homolog 1	154.98	100120	15	8	10	10	5010000	5690000	3350000	8	8	4	6	5	Pyro-glu from Q	67.07	5	2	1	1	49000	51900	296000	4	4	2	1	1
P13864	DNA (cytosine-5)-methyltransferase 1	95.02	183188	3	1	1	2	167000	72600	311000	3	3	1	1	2		192.14	30	24	20	21	2300000	3400000	1980000	8	8	7	6	5
Q01320	DNA topoisomerase 2-alpha	59.72	172789	2	1	1	2	0	263000	512000	2	2	1	1	2		199.89	42	34	33	33	13000000	9230000	4160000	6	6	7	7	6
P28352	DNA-(apurinic or apyrimidinic site) lyase	121.09	35490	21	12	21	21	1710000	2600000	2500000	4	4	2	4	4	Carbamidomethylation	106.49	10	10	10	10	1380000	1340000	1420000	3	2	3	3	5
P60904	DnaJ homolog subfamily C member 5	157.83	22101	29	16	29	29	8020000	7900000	9880000	4	4	4	5	5		405.27	82	81	82	79	3240000000	2700000000	3090000000	40	16	77	82	68
Q91YQ5	Dolichyl-diphosphooligosaccharide--protein glycosyltransferase subunit 1	324.33	68528	54	40	43	41	64500000	68700000	73200000	26	26	20	21	20	Carbamidomethylation; Pyro-glu from Q	235.75	23	16	14	14	22500000	25700000	21700000	17	17	15	14	13
Q9Z108	Double-stranded RNA-binding protein Staufen homolog 1	37.99	53925	5	3	2	0	134000	298000		2	2	1	1	0		136.13	8	2	5	5	142000	1400000	1290000	6	6	1	4	5
Q62418	Drebrin-like protein	75.94	48700	8	3	5	0	608000	1970000		2	2	1	1	0		199.1	40	24	31	22	4660000	6700000	8810000	9	6	7	7	6
O08788	Dynactin subunit 1	177.3	141675	16	11	12	4	7270000	7090000	4720000	12	12	8	10	3	Carbamidomethylation	83.79	16	4	12	6	92500	1770000	173000	4	4	1	3	1
Q99KJ8	Dynactin subunit 2	225.7	44117	49	41	19	36	19300000	22000000	22200000	12	12	11	6	12	Carbamidomethylation; Pyro-glu from Q	245.35	70	66	61	70	10500000	7740000	12800000	12	3	13	13	18
Q9Z0Y1	Dynactin subunit 3	104.72	20978	25	19	19	15	1570000	1290000	2060000	3	3	2	2	2	Carbamidomethylation; Pyro-glu from Q	195.54	39	35	16	15	16300000	13900000	21200000	13	13	11	6	6
Q8CBY8	Dynactin subunit 4	79.08	53057	11	6	6	9	1480000	971000	703000	3	3	2	2	2		211.37	19	16	7	9	4390000	584000	1570000	12	12	10	4	5
Q8K1M6	Dynamin-1-like protein	145.98	82658	13	8	5	7	1570000	1530000	1320000	6	6	4	4	5		172.75	17	13	9	6	3840000	3130000	2720000	8	8	6	4	3
P39054	Dynamin-2	109.26	98145	6	3	2	4	908000	691000	2090000	4	4	2	1	3		105.03	22	22	12	12	618000	332000	261000	2	2	2	1	1
Q9ERU9	E3 SUMO-protein ligase RanBP2	132.09	341122	3	1	1	2	199000	1720000	301000	5	5	2	3	3	Carbamidomethylation; Deamidation (NQ)	153.34	27	15	18	10	3930000	2490000	1040000	8	8	5	5	2
Q7TMY8	E3 ubiquitin-protein ligase HUWE1	73.1	482640	2	1	0	1	229000		124000	3	3	2	0	1	Carbamidomethylation	184.32	7	4	5	3	1300000	981000		13	5	7	9	8
P46935	E3 ubiquitin-protein ligase NEDD4	156.09	102706	9	8	6	7	3870000	4190000	3620000	6	5	6	4	5	Carbamidomethylation	84.11	7	4	3	3	3930000	630000	869000	2	2	1	1	1
A2AN08	E3 ubiquitin-protein ligase UBR4	220.46	572298	6	3	3	4	2300000	1700000	6980000	18	18	11	10	15	Carbamidomethylation; Pyro-glu from Q; Deamidation (NQ)	376.24	17	14	12	11	23600000	36300000	33700000	56	56	46	47	41
P06802	Ectonucleotide pyrophosphatase/phosphodiesterase family member 1	144.13	103176	15	4	12	10	534000	4640000	1880000	9	9	2	7	6	Carbamidomethylation	145.18	4	4	2	2	553000	266000	347000	2	2	2	1	1
O35474	EGF-like repeat and discoidin I-like domain-containing protein 3	120.33	53712	11	4	11	6	1760000	1710000	2320000	3	3	1	3	2	Carbamidomethylation	146.22	16	16	12	7	723000	319000	239000	4	4	4	3	2
P10126	Elongation factor 1-alpha 1	279.74	50114	55	50	44	46	318000000	334000000	372000000	21	21	22	25	24	Carbamidomethylation; Oxidation (M); Pyro-glu from Q	188.32	51	41	39	26	17500000	24100000	24400000	9	9	7	7	7
P57776	Elongation factor 1-delta	268.65	31293	59	54	54	49	51500000	65000000	66400000	14	13	13	16	13	Carbamidomethylation; Oxidation (M); Pyro-glu from Q; Deamidation (NQ)	147.98	21	15	14	17	811000	1460000	1650000	6	6	4	5	5
Q9D8N0	Elongation factor 1-gamma	253.13	50061	47	37	32	44	39800000	37300000	48100000	15	15	13	13	14	Carbamidomethylation	96.15	24	17	13	0	1750000	2350000		3	3	2	2	0
P58252	Elongation factor 2	403.86	95314	66	57	63	56	577000000	743000000	696000000	48	47	56	63	55	Carbamidomethylation; Oxidation (M); Pyro-glu from E; Pyro-glu from Q; Deamidation (NQ)	177.04	49	22	17	44	9770000	16300000	17900000	9	9	5	5	9
Q62419	Endophilin-A2	102.95	41518	8	8	8	8	1680000	1900000	1670000	3	3	3	3	3	Pyro-glu from Q	246.29	66	62	60	55	2600000	4010000	4290000	12	2	14	14	14
Q9JK48	Endophilin-B1	115.29	40855	25	8	22	11	1830000	4790000	3320000	6	6	2	5	3	Pyro-glu from Q	286.01	35	27	20	26	29200000	22100000	28900000	22	22	21	16	21
Q4PZA2	Endothelin-converting enzyme 1	150.59	87073	15	9	7	12	4190000	2390000	6160000	6	6	5	3	5	Deamidation (NQ)	89.91	16	5	8	11	762000	4570000	828000	5	5	2	2	3
P00924	Enolase 1	330.55	46816	55	54	53	55	196000000	184000000	184000000	29	29	36	33	35	Oxidation (M)	78.89	19	19	19	6	414000	796000	426000	2	2	2	2	1
Q03145	Ephrin type-A receptor 2	258.94	108852	36	28	28	27	29500000	38900000	33700000	23	21	19	20	19	Carbamidomethylation	347.88	66	59	56	56	208000000	179000000	228000000	37	37	39	39	40
Q9JIM1	Equilibrative nucleoside transporter 1	210.02	50192	22	22	19	19	96100000	92900000	86000000	8	8	10	10	11	Carbamidomethylation; Oxidation (M)	55.44	5	5	4	2	5020000	4550000	1530000	3	3	3	2	1
Q80TH2	Erbin	115.09	157248	4	4	2	4	1390000	1100000	2190000	3	3	4	2	5		290.27	32	27	24	26	26900000	17800000	24200000	21	21	17	14	22
P54116	Erythrocyte band 7 integral membrane protein	185.81	31375	30	27	25	25	17500000	22600000	12700000	6	6	6	6	6	Carbamidomethylation; Deamidation (NQ)	154.25	15	9	8	13	4080000	1900000	4920000	5	5	3	3	4
Q8R050	Eukaryotic peptide chain release factor GTP-binding subunit ERF3A	102.77	68626	14	4	12	11	398000	1130000	1230000	4	4	1	3	4	Carbamidomethylation	179.31	16	8	8	11	1260000	1270000	1360000	7	7	5	4	5
Q6ZWX6	Eukaryotic translation initiation factor 2 subunit 1	202.17	36108	43	27	26	22	15300000	14200000	11000000	12	12	8	7	6	Carbamidomethylation; Oxidation (M)	92.79	4	4	2	0	280000	174000		2	2	2	1	0
Q99L45	Eukaryotic translation initiation factor 2 subunit 2	185.37	38092	28	28	24	27	13400000	9780000	14500000	9	9	9	7	8	Carbamidomethylation	90.29	7	7	5	5	480000	335000	405000	2	2	2	1	1
Q9Z0N1	Eukaryotic translation initiation factor 2 subunit 3 X-linked	249.36	51066	40	33	33	35	31600000	20700000	35000000	14	14	14	12	13	Carbamidomethylation; Pyro-glu from Q; Deamidation (NQ)	229.73	29	14	16	16	8520000	7290000	11500000	19	17	8	9	10
Q8BJW6	Eukaryotic translation initiation factor 2A	63.12	64403	5	5	3	3	337000	344000	328000	2	2	2	1	1		143.79	15	7	6	12	1870000	1140000	2190000	9	9	5	3	7
P23116	Eukaryotic translation initiation factor 3 subunit A	239.39	161936	22	15	14	19	40200000	33700000	36100000	23	23	17	17	21	Pyro-glu from Q; Deamidation (NQ)	320.7	46	44	41	39	249000000	247000000	227000000	20	20	19	22	20
Q8JZQ9	Eukaryotic translation initiation factor 3 subunit B	273.64	91370	38	32	37	25	21200000	29400000	23800000	21	21	20	23	17	Carbamidomethylation; Pyro-glu from Q	87.03	5	5	5	5	244000	683000	679000	2	2	2	2	2
Q8R1B4	Eukaryotic translation initiation factor 3 subunit C	277.9	105531	29	23	23	26	30800000	26900000	33100000	21	21	17	17	18	Carbamidomethylation; Pyro-glu from Q	63.85	10	10	6	0	1130000	819000		2	2	3	1	0
P60229	Eukaryotic translation initiation factor 3 subunit E	181.59	52221	24	19	21	20	7980000	14200000	19000000	10	10	7	10	10	Pyro-glu from Q	64.9	7	0	7	7		2310000	1750000	2	2	0	2	2
Q9DCH4	Eukaryotic translation initiation factor 3 subunit F	206.07	37984	34	22	22	34	22400000	22800000	23800000	8	8	6	6	9		168.63	29	17	26	21	3320000	3790000	1940000	6	6	4	5	4
Q9Z1D1	Eukaryotic translation initiation factor 3 subunit G	83.3	35638	31	12	22	13	2210000	5320000	1200000	5	5	2	4	2	Carbamidomethylation	50.09	19	11	8	11	1730000	2340000	1900000	2	2	1	1	1
Q91WK2	Eukaryotic translation initiation factor 3 subunit H	162.28	39832	40	19	29	30	5140000	11700000	14000000	10	10	5	9	7	Carbamidomethylation; Pyro-glu from E; Pyro-glu from Q; Deamidation (NQ)	186.13	20	20	7	8	6410000	1860000	702000	8	7	9	5	3
Q9QZD9	Eukaryotic translation initiation factor 3 subunit I	203.66	36461	50	43	34	19	22700000	27100000	8070000	10	10	10	10	3	Carbamidomethylation; Pyro-glu from Q; Deamidation (NQ)	253.76	65	61	65	55	12600000	13600000	11500000	12	2	15	15	14
Q8QZY1	Eukaryotic translation initiation factor 3 subunit L	256.66	66613	36	25	29	27	26700000	31600000	30200000	15	15	12	14	11	Carbamidomethylation; Oxidation (M); Pyro-glu from Q; Deamidation (NQ)	265.91	30	16	25	20	11100000	15100000	16600000	16	16	11	12	14
Q99JX4	Eukaryotic translation initiation factor 3 subunit M	147.13	42517	40	30	16	26	2970000	844000	3490000	7	7	6	3	4	Carbamidomethylation	159.83	38	27	23	18	5590000	6510000	6330000	7	7	5	4	4
Q6NZJ6	Eukaryotic translation initiation factor 4 gamma 1	245.34	176076	15	9	11	9	9590000	6670000	5230000	17	17	13	14	11	Carbamidomethylation; Pyro-glu from E	106.45	22	22	6	10	4740000	2810000	4490000	5	5	6	2	3
Q8BGD9	Eukaryotic translation initiation factor 4B	217.8	68840	25	16	19	23	14900000	14600000	12000000	10	10	7	9	8	Carbamidomethylation; Pyro-glu from E; Deamidation (NQ)	69.4	3	3	3	2	388000	305000	134000	2	2	2	2	1
P63073	Eukaryotic translation initiation factor 4E	80.66	25053	18	12	8	15	4750000	3970000	9750000	4	4	3	2	4	Carbamidomethylation	74.93	9	9	0	0	1400000			2	2	2	0	0
P59325	Eukaryotic translation initiation factor 5	119.16	48968	12	10	10	12	2900000	3920000	4390000	4	4	3	3	4	Carbamidomethylation	215.56	21	18	17	21	23700000	18300000	19600000	10	10	11	9	11
Q05D44	Eukaryotic translation initiation factor 5B	204.16	137616	18	11	8	9	4420000	2850000	3000000	12	12	7	7	6		351.7	47	38	42	39	94200000	98100000	96000000	34	34	35	42	35
O55135	Eukaryotic translation initiation factor 6	137.25	26511	30	24	30	10	4300000	3140000	2580000	4	4	4	4	2	Carbamidomethylation; Pyro-glu from Q	137.58	28	14	20	16	7350000	4030000	3480000	9	8	4	6	4
A6H5Z3	Exocyst complex component 6B	48.6	94130	3	3	0	1	683000		663000	2	2	2	0	1	Carbamidomethylation	52.64	3	1	2	0	446000	216000		2	2	1	1	0
Q6P5F9	Exportin-1	167.84	123093	11	9	6	8	4980000	2380000	4140000	9	9	7	4	6	Carbamidomethylation; Pyro-glu from Q	128.11	17	13	11	7	1590000	3500000		7	2	6	5	3
Q9ERK4	Exportin-2	194.36	110455	19	12	14	10	4390000	4060000	3890000	11	11	8	9	8	Carbamidomethylation; Pyro-glu from Q	216.86	41	35	21	24	14200000	15200000	16300000	8	8	7	6	8
Q3TZZ7	Extended synaptotagmin-2	226.56	94139	29	19	23	21	15100000	14200000	15400000	16	16	12	13	12	Carbamidomethylation; Pyro-glu from Q	139.78	28	17	23	28	8100000	16100000	16100000	4	4	2	5	4
P47753	F-actin-capping protein subunit alpha-1	242.93	32940	66	50	59	46	22500000	22800000	26700000	11	9	9	11	10	Carbamidomethylation; Deamidation (NQ)	93.81	8	8	8	3	516000	739000	569000	2	2	2	2	1
P47754	F-actin-capping protein subunit alpha-2	238.85	32967	70	63	49	40	25700000	25200000	21400000	13	11	13	10	8	Carbamidomethylation; Deamidation (NQ)	70.62	4	4	4	0	281000	396000		2	2	2	2	0
P47757	F-actin-capping protein subunit beta	224.35	31345	53	31	49	42	35900000	29400000	26300000	12	12	9	12	13	Carbamidomethylation; Pyro-glu from Q; Deamidation (NQ)	199.44	55	33	39	27	9170000	8840000	6510000	9	7	7	6	5
Q3U0V1	Far upstream element-binding protein 2	193.11	76776	17	12	10	10	3540000	2840000	9130000	13	13	8	7	8		191.34	15	11	14	9	2960000	6060000	4870000	7	7	6	8	7
P19096	Fatty acid synthase	399.93	272426	48	36	38	30	136000000	140000000	118000000	69	69	60	65	54	Carbamidomethylation; Pyro-glu from Q; Deamidation (NQ)	143.64	19	10	14	16	1590000	2270000	1960000	5	3	4	5	7
B2RXV4	Feline leukemia virus subgroup C receptor-related protein 1	108.07	60469	6	6	3	6	435000	1150000	1230000	2	2	2	1	2	Carbamidomethylation	82.16	6	2	3	0	0	0		2	2	1	1	0
F8VPU2	FERM ARHGEF and pleckstrin domain-containing protein 1	168.87	118875	10	7	3	5	1730000	387000	2620000	7	7	5	2	4		42.35	2	1	0	2	0		78300	2	2	1	0	2
Q8CIB5	Fermitin family homolog 2	181.92	77800	26	11	16	14	3410000	5700000	5420000	11	11	5	6	9	Carbamidomethylation; Deamidation (NQ)	103.52	5	2	2	3	343000	417000	341000	4	4	2	2	2
P09528	Ferritin heavy chain	168.42	21067	44	42	42	38	7980000	16400000	14000000	6	6	7	8	8	Carbamidomethylation; Pyro-glu from Q	302.72	58	45	47	37	114000000	111000000	82400000	17	17	23	24	18
P29391	Ferritin light chain 1	246.89	20802	56	56	49	56	121000000	133000000	95000000	9	9	10	15	12	Pyro-glu from Q	116.36	21	7	3	21			422000	4	2	2	1	6
Q8VHX6	Filamin-C	361.53	291117	28	17	19	20	45300000	47900000	41400000	53	42	34	42	42	Carbamidomethylation; Pyro-glu from Q; Deamidation (NQ)	82.95	27	27	27	27	382000	540000	376000	2	2	2	3	2
Q923D2	Flavin reductase (NADPH)	69.34	22197	15	4	15	4	417000	840000	662000	2	2	1	2	1		319.19	16	10	10	11	33200000	34900000	33900000	51	51	34	32	31
O08917	Flotillin-1	190.49	47513	33	13	30	27	8620000	11300000	71400000	10	10	5	11	8	Deamidation (NQ)	219.74	14	8	8	6	4840000	5500000	18300000	12	12	8	8	5
Q6ZPF4	Formin-like protein 3	63.09	117169	2	1	1	2	465000	577000	4330000	2	2	1	1	2		124.78	6	3	4	2	1260000	808000	0	5	5	3	3	1
Q9R059	Four and a half LIM domains protein 3	170.21	31795	20	20	20	16	3390000	4860000	3380000	5	5	5	5	4	Carbamidomethylation	273.48	43	29	29	29	27600000	27400000	31000000	22	22	14	19	16
Q61584	Fragile X mental retardation syndrome-related protein 1	87.49	76222	9	0	7	4		741000	238000	4	4	0	3	2		125.91	7	3	3	5	1050000	1070000	1310000	4	4	2	2	3
P97807	Fumarate hydratase mitochondrial	217.7	54357	42	32	22	16	10400000	13400000	5440000	12	12	10	6	5	Carbamidomethylation; Deamidation (NQ)	260.43	34	31	32	28	78600000	88000000	76000000	16	15	19	17	20
P16110	Galectin-3	200.72	27515	45	24	44	36	96300000	122000000	146000000	9	9	12	15	15	Oxidation (M); Pyro-glu from Q	198.71	25	17	25	16	62400000	63000000	62900000	9	3	9	9	8
Q8K0C9	GDP-mannose 4 6 dehydratase	57.89	41985	9	0	0	9			727000	2	2	0	0	2	Carbamidomethylation	118.39	25	12	2	13	1080000	1950000	2850000	9	9	5	1	5
P13020	Gelsolin	293.11	85942	38	27	33	29	52900000	59000000	47900000	19	19	18	24	21	Carbamidomethylation; Pyro-glu from Q; Deamidation (NQ)	286.85	31	25	19	26	69900000	66500000	58600000	24	24	26	18	20
Q00612	Glucose-6-phosphate 1-dehydrogenase X	204.68	59263	30	23	23	18	28800000	30200000	17300000	14	14	13	12	8	Carbamidomethylation	192.02	12	8	8	11	2190000	3260000	3590000	9	6	5	6	8
O09172	Glutamate--cysteine ligase regulatory subunit	90.73	30535	15	5	11	15	336000	1890000	2390000	3	3	1	2	3	Pyro-glu from Q	234.86	48	37	42	34	14500000	13300000	11000000	11	11	9	10	9
P47856	Glutamine--fructose-6-phosphate aminotransferase [isomerizing] 1	84.82	78539	5	3	2	3	46900	236000	39300	2	2	1	1	1		203.21	52	24	29	28	6900000	5180000	6510000	10	8	5	4	7
Q8BML9	Glutamine--tRNA ligase	98.22	87677	11	3	6	9	168000	862000	931000	5	5	1	3	4	Carbamidomethylation	119.27	8	8	4	8	7400000	4000000	8190000	2	2	4	1	2
P10649	Glutathione S-transferase Mu 1	150.71	25970	23	15	15	23	1540000	1860000	7870000	4	4	2	3	5		210.01	32	28	32	22	11900000	10300000	7680000	8	8	9	8	7
P19157	Glutathione S-transferase P 1	211.7	23609	53	48	40	45	57800000	40000000	73100000	10	10	12	7	11	Deamidation (NQ)	434.7	49	37	38	39	168000000	194000000	206000000	81	81	68	67	74
P16858	Glyceraldehyde-3-phosphate dehydrogenase	307.92	35810	72	72	72	72	495000000	520000000	513000000	20	20	34	33	36	Carbamidomethylation; Oxidation (M); Deamidation (NQ)	199.02	20	18	13	9	3800000	3470000		9	2	10	8	6
Q9CZD3	Glycine--tRNA ligase	170.25	81878	14	5	9	11	5900000	11300000	6260000	7	7	3	5	5	Carbamidomethylation; Deamidation (NQ)	153.99	29	29	23	12	23800000	17400000	16000000	8	8	9	6	4
Q9JHJ3	Glycosylated lysosomal membrane protein	52.68	43804	10	0	10	5		590000	1080000	2	2	0	3	1	Carbamidomethylation; Pyro-glu from Q; Deamidation (NQ)	206.66	19	13	8	13	8540000	3120000	7980000	11	11	9	4	7
O70310	Glycylpeptide N-tetradecanoyltransferase 1	125.14	56888	22	11	13	11	852000	3760000	1600000	7	7	3	4	6	Carbamidomethylation; Pyro-glu from Q	133.56	30	24	20	16	4320000	3970000	1260000	4	4	4	3	2
Q9QZF2	Glypican-1	224.45	61360	36	21	24	26	15500000	11300000	16500000	14	14	10	9	10	Carbamidomethylation	170.77	29	29	26	16	30300000	34600000	20700000	7	7	7	5	4
Q3THK7	GMP synthase [glutamine-hydrolyzing]	150.82	76724	11	11	8	8	2750000	2410000	2650000	4	4	4	4	4	Deamidation (NQ)	221.64	29	26	20	22	44900000	50200000	18100000	13	13	14	10	10
Q61543	Golgi apparatus protein 1	120.61	133734	7	4	6	4	2970000	5890000	6540000	6	6	3	5	5	Carbamidomethylation	140.21	20	13	12	10	6250000	6630000	7830000	9	9	5	5	5
Q99JX3	Golgi reassembly-stacking protein 2	142.36	47038	15	15	7	7	3490000	1870000	1800000	4	4	4	2	2	Carbamidomethylation	71.62	7	4	3	7	1230000	2590000	4490000	2	2	1	1	2
Q8BMP6	Golgi resident protein GCP60	136.25	60181	14	8	11	14	184000	601000	2190000	4	4	2	3	6	Carbamidomethylation; Pyro-glu from Q	74.03	6	0	3	6		174000	163000	2	2	0	1	2
Q9CYL5	Golgi-associated plant pathogenesis-related protein 1	180.77	17090	60	60	34	42	44800000	25400000	34700000	7	7	8	3	4	Carbamidomethylation	140.77	26	8	26	14	43600	1400000	663000	4	4	1	4	2
P08556	GTPase NRas	209.49	21199	51	51	44	44	2440000	2670000	2820000	9	2	12	12	10	Carbamidomethylation; Oxidation (M); Pyro-glu from Q	83.62	2	2	1	2	1380000	740000	1560000	2	2	2	1	3
O08582	GTP-binding protein 1	71.78	72301	7	2	3	2	0	67800	0	3	3	1	1	1		307.54	62	38	43	50	26900000	60700000	38000000	20	16	14	23	18
P36536	GTP-binding protein SAR1a	115.36	22371	33	27	17	17	1340000	1500000	740000	4	3	4	3	2	Carbamidomethylation	111.41	5	5	5	5	263000	374000	369000	2	2	2	2	2
P08752	Guanine nucleotide-binding protein G(i) subunit alpha-2	316.11	40489	63	63	63	63	130000000	132000000	142000000	21	12	35	32	28	Carbamidomethylation; Oxidation (M); Pyro-glu from Q; Deamidation (NQ)	178.58	51	38	39	32	8850000	3750000	7320000	8	6	6	7	8
Q9DC51	Guanine nucleotide-binding protein G(k) subunit alpha	279.48	40538	61	54	53	56	38300000	25300000	25600000	19	10	21	19	19	Carbamidomethylation; Pyro-glu from Q; Deamidation (NQ)	95.27	15	6	3	12	924000		980000	4	3	2	1	3
P18872	Guanine nucleotide-binding protein G(o) subunit alpha	171.5	40085	24	19	24	18	4310000	5210000	3390000	7	4	5	9	8	Carbamidomethylation; Pyro-glu from Q	189.68	45	34	36	30	7800000	11500000	7940000	8	8	6	7	6
P21279	Guanine nucleotide-binding protein G(q) subunit alpha	150.96	42158	26	19	12	22	1920000	2290000	5090000	7	2	5	3	6		319.1	71	58	60	67	317000000	324000000	343000000	38	35	39	37	42
P63094	Guanine nucleotide-binding protein G(s) subunit alpha isoforms short	249.1	45664	43	38	31	43	30400000	24800000	31500000	13	11	15	16	18	Carbamidomethylation; Pyro-glu from Q; Deamidation (NQ)	59.77	8	3	5	5	351000	2150000	2420000	2	2	1	1	1
P27601	Guanine nucleotide-binding protein subunit alpha-13	128.32	44055	16	12	12	16	3700000	3780000	4380000	5	4	5	5	7		104.2	9	3	6	3	545000	598000	613000	5	5	2	3	2
P29387	Guanine nucleotide-binding protein subunit beta-4	200.01	37379	44	41	28	19	1680000	2330000		8	4	9	7	4	Carbamidomethylation; Pyro-glu from Q	264.03	37	21	29	27	35900000	40300000	44200000	16	16	11	14	16
Q9WVD4	H(+)/Cl(-) exchange transporter 5	48.48	83101	4	1	0	3	376000		22000	2	2	1	0	1		99.91	10	10	6	6	5270000	4090000	3220000	2	2	2	1	1
P17879	Heat shock 70 kDa protein 1B	232.05	70176	33	27	24	23	670000		80400	15	2	15	16	16	Carbamidomethylation; Pyro-glu from Q; Deamidation (NQ)	198.39	17	14	14	13	4900000	5100000	3610000	11	7	9	14	10
P16627	Heat shock 70 kDa protein 1-like	186.99	70637	18	11	13	15	701000		6370000	9	2	7	8	9	Oxidation (M); Deamidation (NQ)	187.21	28	14	23	28	55600000	52500000	62500000	7	7	7	9	10
P63017	Heat shock cognate 71 kDa protein	378.36	70871	67	59	61	63	491000000	562000000	564000000	36	24	56	58	56	Carbamidomethylation; Oxidation (M); Pyro-glu from Q; Deamidation (NQ)	183.96	58	54	46	52	41000000	37200000	43900000	10	9	9	7	9
Q61699	Heat shock protein 105 kDa	189.77	96407	14	8	10	9	7740000	8220000	8620000	9	8	6	7	8	Carbamidomethylation	58.28	14	7	7	7	213000	468000	378000	2	2	1	1	1
P14602	Heat shock protein beta-1	331.32	23014	81	76	81	81	380000000	375000000	404000000	27	27	29	25	27	Pyro-glu from Q	97.86	14	11	3	5	1620000	1560000	1640000	3	3	2	1	1
Q99LI8	Hepatocyte growth factor-regulated tyrosine kinase substrate	81.29	86015	8	5	8	5	0	1650000	163000	2	2	1	2	2	Deamidation (NQ)	244.63	48	28	37	33	13500000	36500000	21200000	12	12	7	9	10
Q8BG05	Heterogeneous nuclear ribonucleoprotein A3	187.85	39652	25	16	20	25	8170000	13400000	13700000	8	7	4	8	10		164.27	28	23	20	23	13400000	12900000	17000000	7	7	7	6	6
Q9Z2X1	Heterogeneous nuclear ribonucleoprotein F	200.68	45730	25	22	21	25	11000000	7670000	8520000	6	4	6	6	6	Deamidation (NQ)	105.92	5	3	3	5	594000	298000	914000	2	2	1	1	2
P61979	Heterogeneous nuclear ribonucleoprotein K	231.2	50976	38	30	36	26	33700000	28500000	26600000	11	11	11	12	9	Carbamidomethylation; Oxidation (M); Deamidation (NQ)	142.11	41	28	28	41	26500000	27200000	33700000	3	3	5	3	5
Q9D0E1	Heterogeneous nuclear ribonucleoprotein M	41.32	77649	4	0	2	2		2720000	749000	2	2	0	2	1		183.95	65	56	65	42	52200000	56400000	54000000	7	7	6	7	4
Q7TMK9	Heterogeneous nuclear ribonucleoprotein Q	178.46	69633	23	16	15	16	8370000	10800000	10100000	11	11	7	6	7	Carbamidomethylation	128.04	30	27	24	17	4620000	5710000	3220000	7	7	6	6	3
O88569	Heterogeneous nuclear ribonucleoproteins A2/B1	140.8	37403	29	22	22	13	19900000	19100000	11300000	9	7	7	6	4	Deamidation (NQ)	174.98	25	12	15	18	143000000	4510000	6330000	7	7	5	5	7
P62748	Hippocalcin-like protein 1	70.02	22338	19	13	19	13	5180000	6210000	7230000	3	3	2	3	3	Carbamidomethylation	122.4	46	34	39	27	5730000	3290000	2660000	5	5	4	4	3
P43275	Histone H1.1	63.63	21785	15	15	9	9	3290000	1450000	730000	2	2	2	1	1	Deamidation (NQ)	117.48	35	34	27	0	318000	736000		4	4	3	3	0
P15864	Histone H1.2	122.81	21267	11	11	11	11	3730000	2350000	0	3	2	4	3	2		199.77	10	8	10	8	39900000	33300000	39100000	7	7	10	14	10
Q60973	Histone-binding protein RBBP7	129.68	47790	22	15	11	4	1340000	1220000		6	2	5	3	2	Carbamidomethylation	82.46	18	14	13	9	14600000	14200000	14400000	4	4	3	3	3
Q8JZK9	Hydroxymethylglutaryl-CoA synthase cytoplasmic	211.55	57569	32	24	16	11	8900000	5590000	3940000	11	11	8	6	5	Carbamidomethylation; Deamidation (NQ)	110.75	19	0	11	13		1220000	2700000	3	3	0	2	2
P00493	Hypoxanthine-guanine phosphoribosyltransferase	173.38	24570	54	26	44	48	6410000	15000000	13500000	8	8	3	7	7	Carbamidomethylation	173.94	33	33	24	12	4030000	5440000	2020000	5	5	6	6	3
Q6ZQA6	Immunoglobulin superfamily member 3	76.57	134710	4	2	2	2	372000	470000	297000	2	2	1	1	1		119.19	21	18	7	3	133000	390000	60400	4	4	4	2	1
P52293	Importin subunit alpha-1	201.52	57928	33	24	24	26	6220000	5890000	6360000	10	10	9	8	7	Carbamidomethylation; Pyro-glu from Q; Deamidation (NQ)	156.62	22	15	14	4	6040000	5450000	239000	5	5	3	4	1
O35345	Importin subunit alpha-7	145.28	59964	16	14	13	9	628000	770000	614000	5	5	4	4	3	Carbamidomethylation	125.33	13	13	4	4	3850000	6670000	4890000	5	4	6	3	3
P70168	Importin subunit beta-1	295.75	97184	47	36	36	36	73800000	83900000	86800000	28	28	27	28	31	Carbamidomethylation; Deamidation (NQ)	159.01	51	30	51	30	25200000	29600000	11200000	4	4	3	4	2
P24547	Inosine-5'-monophosphate dehydrogenase 2	212.62	55815	29	16	21	23	8780000	7560000	15700000	11	11	8	9	9	Carbamidomethylation	80.24	8	5	6	3	771000	169000	139000	3	3	2	2	1
Q80V26	Inositol monophosphatase 3	132.34	38616	15	15	8	15	2230000	621000	2650000	2	2	2	1	3		230.37	24	17	14	17	17500000	21600000	16000000	25	25	17	16	18
P11688	Integrin alpha-5	326.84	115043	42	38	38	34	170000000	170000000	165000000	33	33	32	35	30	Carbamidomethylation; Pyro-glu from Q; Deamidation (NQ)	172.89	16	8	12	9	20700000	13700000	23400000	5	5	5	4	4
Q61739	Integrin alpha-6	287.27	122159	32	26	24	20	42900000	40000000	35800000	23	23	23	23	18	Carbamidomethylation; Deamidation (NQ)	181.47	11	8	4	6	1200000		4040000	7	2	5	3	5
Q61738	Integrin alpha-7	386.27	129329	60	47	48	49	254000000	272000000	277000000	54	54	54	52	52	Carbamidomethylation; Pyro-glu from Q; Deamidation (NQ)	84.38	5	3	3	3	81900	264000	228000	2	2	1	1	1
P09055	Integrin beta-1	336.71	88231	43	35	42	41	456000000	463000000	481000000	30	30	36	39	40	Carbamidomethylation; Oxidation (M); Deamidation (NQ)	304.78	64	57	57	60	80400000	74600000	66700000	19	13	24	24	24
Q99J93	Interferon-induced transmembrane protein 2	119.84	15743	29	17	18	6	605000	385000		3	2	2	2	1		322.52	64	62	60	53	10100000	17400000	17400000	26	6	28	27	28
Q9CXY6	Interleukin enhancer-binding factor 2	65.95	43062	11	3	8	4	725000	1150000	1010000	3	3	1	3	1	Deamidation (NQ)	96.7	42	31	31	11	2720000	828000	5840000	3	3	3	3	1
Q0GNC1	Inverted formin-2	110.14	138560	7	7	1	3	201000	55500	48700	4	4	4	1	2	Carbamidomethylation; Pyro-glu from Q	81.91	6	3	3	0	150000	544000		2	2	1	1	0
Q9CX00	IST1 homolog	126.38	39468	14	8	5	14	8500000	5680000	7460000	4	4	3	2	4		150.55	18	11	16	13	1250000	3020000	1650000	5	5	3	5	3
Q02257	Junction plakoglobin	260.64	81801	39	19	23	23	8170000	7020000	8260000	17	13	11	12	12	Carbamidomethylation	146.73	31	24	24	21	3780000	3840000	4140000	4	4	3	3	3
P02535	Keratin type I cytoskeletal 10	200.01	57770	19	15	14	17	87200000	59100000	90700000	10	6	13	10	14	Oxidation (M); Pyro-glu from Q; Deamidation (NQ)	230.32	12	8	7	9	6300000	6540000	7520000	13	13	10	9	10
Q9Z2K1	Keratin type I cytoskeletal 16	99.93	51606	13	2	6	13		1540000	3090000	5	2	1	3	6	Oxidation (M)	71.47	5	3	5	0	86100	423000		2	2	1	2	0
Q6IFX2	Keratin type I cytoskeletal 42	144.16	50133	15	12	15	11	6930000	8550000	1980000	6	3	4	6	5		110.02	17	13	0	17	4330000		4820000	3	3	2	0	3
P04104	Keratin type II cytoskeletal 1	110.37	65606	4	4	4	4	64200000	61700000	59400000	3	2	5	5	5	Deamidation (NQ)	83.62	2	2	1	2	1380000	740000	1560000	2	2	2	1	3
Q3TTY5	Keratin type II cytoskeletal 2 epidermal	96.12	70923	13	6	11	7	15900000	19100000	19500000	8	7	4	6	5	Carbamidomethylation; Deamidation (NQ)	106.64	4	2	3	3	331000	738000	446000	3	3	1	2	3
Q922U2	Keratin type II cytoskeletal 5	140.85	61767	11	6	9	9	58800000	76200000	65400000	6	3	4	6	6	Carbamidomethylation	115.8	10	5	7	5	1510000	1050000	1070000	4	4	2	2	2
Q80W68	Kin of IRRE-like protein 1	161.62	87176	16	4	13	6	1870000	3960000	3010000	7	7	3	5	4	Carbamidomethylation; Deamidation (NQ)	145.9	16	9	8	7	2760000	3470000	3570000	7	7	3	3	4
O88447	Kinesin light chain 1	61.92	61450	9	2	5	6	727000	700000	646000	3	3	1	2	2	Carbamidomethylation	73.37	28	14	0	14	1290000		3950000	5	5	2	0	3
Q61768	Kinesin-1 heavy chain	205.9	109551	18	7	11	13	1880000	4110000	4320000	11	11	5	9	8	Carbamidomethylation; Pyro-glu from Q; Deamidation (NQ)	145.69	14	6	6	14	971000	233000	2440000	6	6	3	3	6
P21956	Lactadherin	306.64	51241	44	41	40	41	285000000	224000000	320000000	19	19	24	20	23	Carbamidomethylation; Pyro-glu from Q; Deamidation (NQ)	146.19	21	17	8	9	0	958000	2140000	6	3	5	2	3
P02469	Laminin subunit beta-1	180.11	197089	11	4	7	4	1670000	3630000	2250000	11	11	4	9	3	Carbamidomethylation	337.15	59	57	56	56	124000000	160000000	162000000	30	30	34	31	31
Q9Z1R2	Large proline-rich protein BAG6	134.52	121037	6	4	3	5	1930000	1100000	1640000	4	4	2	1	3		150.72	16	15	11	16	2260000	1610000	2550000	4	4	4	3	4
Q505F5	Leucine-rich repeat-containing protein 47	72.25	63590	6	2	3	2	258000	258000	244000	2	2	1	1	1		130.09	13	13	10	5	2630000	1100000	1040000	3	3	4	3	2
Q922Q8	Leucine-rich repeat-containing protein 59	193.92	34877	32	32	32	32	91000000	80100000	87100000	10	10	11	8	11	Carbamidomethylation	94.53	4	1	3	1	634000	619000	694000	3	3	1	2	1
P24527	Leukotriene A-4 hydrolase	206.04	69051	32	14	19	24	8780000	10000000	16600000	14	14	7	10	11	Carbamidomethylation; Pyro-glu from Q; Deamidation (NQ)	68.68	19	3	19	0	610000	1150000		3	3	1	3	0
Q99JW4	LIM and senescent cell antigen-like-containing domain protein 1	100.83	37240	13	5	13	5	1090000	3480000	1030000	3	3	1	3	1	Carbamidomethylation	93.39	17	8	13	13	2370000	3470000	2370000	3	3	1	2	3
Q8BFW7	Lipoma-preferred partner homolog	49.22	65891	8	4	0	4	288000		298000	2	2	1	0	1	Carbamidomethylation	125.85	13	6	8	2	806000	3990000	943000	7	7	3	5	2
Q9QUJ7	Long-chain-fatty-acid--CoA ligase 4	90.98	79077	10	7	3	0	195000	562000		4	4	3	1	0	Carbamidomethylation	78.87	12	12	0	5	946000		117000	3	3	3	0	1
Q9D358	Low molecular weight phosphotyrosine protein phosphatase	80.93	18192	17	11	11	6	0	248000	1260000	2	2	1	1	1		145.45	13	4	7	10	2770000	2410000	6640000	7	7	2	4	6
Q64253	Lymphocyte antigen 6E	78.47	13800	18	11	11	18	8430000	10500000	13200000	2	2	1	2	3	Carbamidomethylation	197.51	26	16	12	19	4090000	4750000	5580000	9	9	6	6	7
O35114	Lysosome membrane protein 2	174.38	54044	18	15	13	11	11000000	10100000	12100000	6	6	6	5	5	Carbamidomethylation; Deamidation (NQ)	37.25	10	5	5	0	520000	470000		2	2	1	1	0
P11438	Lysosome-associated membrane glycoprotein 1	152.99	43865	12	12	12	8	70300000	77700000	63300000	4	4	5	6	6	Carbamidomethylation; Oxidation (M); Deamidation (NQ)	83.62	2	2	1	2	1380000	740000	1560000	2	2	2	1	3
P14152	Malate dehydrogenase cytoplasmic	232.55	36511	39	39	30	35	31400000	24600000	25500000	8	8	10	7	8	Carbamidomethylation	137.65	3	2	2	3	2640000	756000	895000	5	5	3	4	3
Q8CI59	Metalloreductase STEAP3	126.1	54749	24	10	17	5	3350000	2550000	3200000	7	7	3	5	2	Carbamidomethylation; Pyro-glu from Q	192.6	23	15	18	14	7220000	4020000	2670000	8	8	6	6	5
O08663	Methionine aminopeptidase 2	112.12	52922	16	10	9	5	1340000	1730000	678000	5	5	3	3	1	Carbamidomethylation	82.58	7	7	6	0	1980000	1770000		3	3	3	0	0
P27546	Microtubule-associated protein 4	162.39	117429	10	6	8	3	4240000	5580000	3730000	6	6	3	5	2	Carbamidomethylation	168.63	12	7	7	10	3430000	4200000	6310000	11	11	7	7	9
Q61166	Microtubule-associated protein RP/EB family member 1	153	30016	41	28	21	32	4270000	7260000	5170000	7	7	4	4	5	Carbamidomethylation; Pyro-glu from Q	81.31	9	5	0	3	450000		882000	4	4	2	0	2
Q9CYG7	Mitochondrial import receptor subunit TOM34	56.05	34278	9	6	3	0	98700	142000		2	2	1	1	0		249.83	46	46	41	46	19400000	19300000	23100000	10	8	11	12	12
P63085	Mitogen-activated protein kinase 1	139.14	41276	27	19	4	20	1690000		2490000	6	5	4	1	4	Carbamidomethylation	375.62	62	61	56	48	263000000	279000000	207000000	32	20	49	48	40
P10404	MLV-related proviral Env polyprotein	193.45	69613	17	17	13	13	21000000	21500000	19100000	7	7	9	8	8	Carbamidomethylation; Pyro-glu from Q	319.23	60	56	52	52	398000000	418000000	545000000	22	22	28	26	31
P06795	Multidrug resistance protein 1B	194.9	140993	10	6	3	7	840000	0	155000	6	3	3	2	4	Carbamidomethylation; Pyro-glu from Q	128.12	6	4	3	0	4270000	2830000		6	5	4	3	0
Q9DCL9	Multifunctional protein ADE2	223.9	47006	37	34	25	28	10900000	10100000	12400000	11	11	10	7	9	Carbamidomethylation	128.05	22	4	6	11	0	530000	970000	5	5	1	1	3
Q8VCR8	Myosin light chain kinase 2 skeletal/cardiac muscle	43.26	65990	4	4	3	1	604000	0	1260000	2	2	2	1	1		93.6	11	4	7	7	0	588000	343000	3	3	1	2	2
Q60605	Myosin light polypeptide 6	183.14	16930	58	32	51	58	49500000	74900000	80100000	8	8	8	8	10	Carbamidomethylation; Oxidation (M); Deamidation (NQ)	174.86	16	9	7	14	3500000	2680000	5010000	7	7	4	4	6
Q3THE2	Myosin regulatory light chain 12B	138.2	19779	23	23	23	16	19100000	19200000	11100000	3	3	3	3	4	Oxidation (M)	46.63	6	3	3	3	265000	156000	317000	2	2	1	1	1
Q8VDD5	Myosin-9	439.87	226370	42	36	35	36	213000000	180000000	197000000	78	68	82	74	87	Carbamidomethylation; Oxidation (M); Pyro-glu from Q; Deamidation (NQ)	209.28	11	5	6	5	2870000	1990000	2950000	15	15	7	9	8
Q99LD8	N(G) N(G)-dimethylarginine dimethylaminohydrolase 2	198.57	29646	53	41	33	37	9820000	5000000	11400000	9	8	6	5	6	Carbamidomethylation	159.91	32	26	21	21	2150000	1940000	2740000	6	6	4	3	4
Q64669	NAD(P)H dehydrogenase [quinone] 1	139.9	30960	26	26	20	16	13100000	11000000	10200000	6	6	6	4	3	Carbamidomethylation	92.62	13	5	9	8	273000	289000	129000	3	3	1	2	2
Q80UM3	N-alpha-acetyltransferase 15 NatA auxiliary subunit	53.26	100961	5	1	0	4	1700000		319000	3	3	1	0	3	Deamidation (NQ)	41.15	11	10	11	0	921000	893000		2	2	0	3	0
P28660	Nck-associated protein 1	188.23	128784	16	10	6	11	9970000	5590000	5080000	13	13	8	5	8	Carbamidomethylation; Pyro-glu from Q	86.05	9	6	6	4	448000	594000	157000	3	3	2	2	1
O35516	Neurogenic locus notch homolog protein 2	64.76	265326	1	1	1	1	551000	414000	368000	2	2	3	1	1	Carbamidomethylation	116.6	13	9	6	6	1310000	2460000	216000	4	4	2	2	2
P05480	Neuronal proto-oncogene tyrosine-protein kinase Src	112.18	60645	10	8	4	4	2720000	772000	763000	4	3	3	2	2	Carbamidomethylation	124.67	5	4	5	4	62200000	40600000	64400000	4	2	4	4	4
P97333	Neuropilin-1	82.8	103000	4	2	4	4	404000	1110000	1150000	2	2	1	2	2		172.11	35	35	35	35	5200000	5690000	5570000	5	4	5	5	4
O35874	Neutral amino acid transporter A	207.28	56062	25	20	18	18	18200000	16900000	12800000	7	7	6	5	6	Carbamidomethylation; Deamidation (NQ)	179.19	23	18	19	19	5640000	10400000	11000000	5	5	4	6	6
P51912	Neutral amino acid transporter B(0)	180.63	58483	15	10	11	10	6680000	6610000	6020000	6	6	4	4	3	Carbamidomethylation	86.84	5	4	2	2	730000	483000	293000	3	3	2	1	1
P10493	Nidogen-1	41.46	136538	3	1	0	2	45900		0	2	2	1	0	1		184.57	11	9	9	11	17200000	21000000	22400000	5	5	6	7	8
Q99K48	Non-POU domain-containing octamer-binding protein	109.5	54541	9	5	2	7	1220000		1200000	3	2	2	1	3	Carbamidomethylation	149.86	14	10	8	4	4380000	913000	1410000	4	4	3	2	1
O35604	NPC intracellular cholesterol transporter 1	96.26	142884	3	2	1	3	1400000	1220000	2000000	3	3	2	1	3	Carbamidomethylation; Pyro-glu from Q	58.95	10	4	10	4	0	5370000	4800000	2	2	1	2	1
Q9Z0J0	NPC intracellular cholesterol transporter 2	125.82	16442	40	34	34	34	20500000	19600000	23100000	5	5	5	5	5	Carbamidomethylation	200.25	33	22	24	26	16500000	10000000	13400000	9	9	8	9	8
Q9CZ44	NSFL1 cofactor p47	179.03	40710	33	19	18	27	6780000	7070000	11300000	9	9	6	6	7		154.13	15	15	11	15	21200000	14000000	21100000	5	5	6	4	7
Q99MD9	Nuclear autoantigenic sperm protein	200.71	83954	21	11	16	12	2180000	4330000	2330000	11	10	6	10	6	Carbamidomethylation; Pyro-glu from Q; Deamidation (NQ)	140.09	15	13	15	13	2720000	3610000	3570000	5	4	5	6	6
Q3UYV9	Nuclear cap-binding protein subunit 1	74.08	91927	3	1	0	2	530000		152000	2	2	1	0	1		73.31	8	8	8	0	2410000	2220000		3	3	3	0	0
P62960	Nuclease-sensitive element-binding protein 1	308.41	35730	61	61	55	55	84400000	72900000	75200000	19	15	26	27	22	Oxidation (M); Pyro-glu from E; Deamidation (NQ)	79.97	20	19	20	20	20600000	1610000	20700000	4	4	3	2	4
Q9JIK5	Nucleolar RNA helicase 2	58.09	93551	4	0	4	3		1670000	1040000	3	3	0	3	2		127.07	2	1	2	1	73900	890000	114000	3	3	2	3	1
P09405	Nucleolin	280.84	76723	37	33	28	32	76600000	81900000	72000000	21	21	19	20	21	Pyro-glu from Q	322.85	43	34	39	37	319000000	300000000	301000000	27	27	32	27	34
Q61937	Nucleophosmin	169.11	32560	26	22	18	16	10600000	7870000	11700000	5	5	6	5	6	Oxidation (M)	205.8	21	17	11	7	7230000	5040000	3980000	11	10	10	8	5
P28656	Nucleosome assembly protein 1-like 1	235.16	45345	57	44	50	51	69800000	72000000	75500000	16	15	14	17	20	Carbamidomethylation	110.64	15	11	9	4	1580000	1330000	500000	3	3	2	2	1
Q9CZ30	Obg-like ATPase 1	164.28	44730	20	17	10	18	6620000	4350000	6050000	5	5	5	4	5	Carbamidomethylation	327.95	60	46	42	57	26600000	25700000	33500000	23	23	18	18	22
Q3B7Z2	Oxysterol-binding protein 1	40.37	88797	4	0	2	2		340000	508000	2	2	0	1	1	Carbamidomethylation	78.37	4	2	4	2	932000	828000	787000	2	2	1	2	1
Q9Z0P4	Paralemmin-1	190.23	41614	27	24	20	13	10100000	10600000	10700000	8	8	8	7	3	Oxidation (M); Deamidation (NQ)	120.04	11	8	8	5	142000	23600000	19200	5	5	3	4	3
Q8CI51	PDZ and LIM domain protein 5	120.77	63299	10	5	5	10	1180000	567000	937000	4	4	2	2	3	Carbamidomethylation	117.71	9	9	5	9	2400000	3190000	3990000	3	3	3	2	3
Q3TJD7	PDZ and LIM domain protein 7	75.94	50119	9	4	5	4	79600	785000	367000	3	3	1	2	1		237.96	27	27	21	21	6520000	5550000	7360000	9	9	9	9	10
Q8BFY6	Peflin	96.85	29228	14	9	9	14	3370000	2850000	3520000	3	3	2	2	3	Carbamidomethylation	153.83	19	19	19	19	1780000	2420000	2430000	3	3	3	3	3
P30412	Peptidyl-prolyl cis-trans isomerase C	103.91	22794	17	17	10	10	11000000	5330000	5760000	3	3	3	2	2		235.25	58	49	58	42	117000000	88800000	84300000	10	10	9	14	7
Q9DBG5	Perilipin-3	189.56	47262	29	29	26	25	7470000	5630000	5750000	6	6	7	7	6		107.35	20	12	12	20	322000	353000	2020000	2	2	1	1	3
O70589	Peripheral plasma membrane protein CASK	139.74	105109	11	8	6	5	2320000	2210000	1020000	7	7	5	3	3	Carbamidomethylation; Deamidation (NQ)	295.01	66	48	51	48	37600000	44700000	50300000	24	24	19	18	20
P51660	Peroxisomal multifunctional enzyme type 2	110.36	79482	5	5	5	5	2100000	2500000	2830000	3	3	3	3	3		246.89	61	60	53	54	49000000	38400000	42000000	10	10	13	8	10
Q8C0C7	Phenylalanine--tRNA ligase alpha subunit	84.5	57599	8	0	6	8		1290000	144000	2	2	0	1	2	Carbamidomethylation	140.92	14	11	11	8	305000	261000	484000	4	4	3	3	2
Q9WUA2	Phenylalanine--tRNA ligase beta subunit	106.3	65697	16	5	8	13	3940000	7620000	7190000	9	9	3	5	7	Carbamidomethylation	194.04	48	27	44	44	23700000	37500000	29900000	10	10	6	9	9
P70296	Phosphatidylethanolamine-binding protein 1	206.38	20830	68	61	56	64	17700000	34300000	28900000	7	7	7	7	8	Carbamidomethylation	155.2	9	5	5	4	1760000	2130000	2750000	10	10	5	6	5
E9Q3L2	Phosphatidylinositol 4-kinase alpha	40.88	237040	2	0	2	1		119000	27300	2	2	0	1	1	Deamidation (NQ)	202.97	10	4	6	5	1230000	1930000	3710000	17	17	8	9	9
P09411	Phosphoglycerate kinase 1	320.6	44550	64	61	59	51	254000000	243000000	251000000	21	21	30	32	28	Carbamidomethylation; Oxidation (M); Pyro-glu from Q; Deamidation (NQ)	262.64	37	24	34	26	56400000	60100000	60300000	19	19	15	18	17
Q9D0M1	Phosphoribosyl pyrophosphate synthase-associated protein 1	147.33	39432	29	29	18	26	4380000	1830000	2990000	7	6	8	4	7	Deamidation (NQ)	55.3	7	0	7	4		587000	459000	2	2	0	2	1
Q5SUR0	Phosphoribosylformylglycinamidine synthase	190.54	144629	15	7	13	7	777000	1160000	1790000	9	9	4	7	5	Carbamidomethylation	61.39	5	2	2	2	298000	232000	387000	2	2	1	1	1
P63005	Platelet-activating factor acetylhydrolase IB subunit alpha	170.51	46670	29	19	15	21	7840000	9880000	8290000	8	7	5	5	5	Carbamidomethylation	308.21	61	58	61	61	59800000	59900000	56200000	20	16	29	26	24
P05622	Platelet-derived growth factor receptor beta	200.7	122806	13	9	7	6	7710000	9370000	4950000	12	12	7	7	5	Deamidation (NQ)	125.91	18	6	10	13	332000	2880000	3890000	7	5	3	4	5
Q9QXS1	Plectin	508.56	534193	44	34	33	36	482000000	488000000	504000000	170	168	155	149	157	Carbamidomethylation; Pyro-glu from Q; Deamidation (NQ)	105.54	23	23	23	12	424000	490000	511000	2	2	2	2	1
P70206	Plexin-A1	185.2	211098	10	6	8	7	2710000	3600000	3740000	13	13	8	9	9	Carbamidomethylation; Pyro-glu from Q; Deamidation (NQ)	240.76	35	27	28	24	33500000	29100000	28900000	20	20	16	19	18
B2RXS4	Plexin-B2	298.58	206229	25	17	17	18	29200000	28300000	26500000	29	29	19	22	19	Carbamidomethylation	274	24	13	15	15	17300000	23400000	14900000	30	30	14	19	18
P60335	Poly(rC)-binding protein 1	226.07	37498	45	37	42	31	21700000	20700000	17900000	10	7	12	11	8	Carbamidomethylation; Oxidation (M); Pyro-glu from Q	78.34	23	11	18	5	7850000	7110000	3010000	4	4	2	3	1
Q61990	Poly(rC)-binding protein 2	163.29	38222	30	14	30	16	2170000	7620000	3690000	7	4	5	7	4	Carbamidomethylation; Oxidation (M)	387.12	58	49	55	49	217000000	247000000	194000000	50	50	49	49	46
Q3UEB3	Poly(U)-binding-splicing factor PUF60	111.88	60249	24	13	9	12	1590000	1180000	1030000	6	6	4	3	4	Carbamidomethylation; Oxidation (M); Pyro-glu from Q	76.34	7	3	0	4	615000		238000	2	2	1	0	1
P29341	Polyadenylate-binding protein 1	271.04	70671	33	28	24	28	52300000	27300000	42000000	18	18	17	13	16	Carbamidomethylation	188.94	13	10	12	9	8740000	9880000	8350000	9	9	8	9	7
P17225	Polypyrimidine tract-binding protein 1	195.88	56478	30	20	15	23	8930000	9670000	7000000	7	7	5	5	5	Carbamidomethylation	337.4	72	68	72	70	687000000	646000000	703000000	21	21	35	36	36
O70591	Prefoldin subunit 2	72.77	16534	17	17	0	17	2990000		5460000	2	2	2	0	2		119.26	8	4	7	2	575000	961000	87400	5	5	2	3	1
Q99KP6	Pre-mRNA-processing factor 19	175.62	55239	25	12	18	17	4170000	4600000	1950000	6	6	4	5	4	Carbamidomethylation; Pyro-glu from Q; Deamidation (NQ)	77.42	9	9	0	5	2250000		1070000	2	2	2	0	1
P49769	Presenilin-1	179.89	52640	17	13	17	7	3570000	2120000	2640000	5	5	4	6	2		134.1	13	6	8	7	325000	834000	534000	5	5	2	3	3
Q922K7	Probable 28S rRNA (cytosine-C(5))-methyltransferase	59.99	86752	4	2	2	2	220000	468000	0	2	2	1	1	1		101.59	17	0	10	7		5630000	275000	3	3	0	2	1
P54823	Probable ATP-dependent RNA helicase DDX6	130.53	54192	18	11	14	10	655000	3070000	957000	5	5	3	4	3	Carbamidomethylation; Pyro-glu from Q	188.26	24	21	13	13	6060000	3910000	3650000	7	7	7	4	4
P70398	Probable ubiquitin carboxyl-terminal hydrolase FAF-X	154.25	290709	3	2	3	2	1630000	2370000	612000	6	6	4	5	3	Carbamidomethylation	159.03	19	15	4	9	2540000	1330000	3620000	6	5	4	2	3
Q8K297	Procollagen galactosyltransferase 1	71.59	71061	5	5	5	5	1120000	724000	1270000	2	2	2	2	3		99.19	7	5	7	5	1700000	2390000	1600000	3	3	2	3	2
Q9JHZ2	Progressive ankylosis protein	226.1	54298	27	23	27	27	16600000	20200000	29900000	10	10	11	10	11		135.34	22	17	22	17	1390000	3100000	2480000	4	4	3	5	3
P17918	Proliferating cell nuclear antigen	220.92	28785	52	41	36	52	20400000	18400000	29500000	8	8	7	6	10	Carbamidomethylation; Deamidation (NQ)	252.14	38	25	13	22	1500000	2300000	5080000	15	8	13	12	15
P50580	Proliferation-associated protein 2G4	223.38	43699	35	31	20	22	36100000	19300000	23500000	11	11	12	7	8	Carbamidomethylation; Deamidation (NQ)	216.95	29	22	20	17	15800000	11400000	11300000	13	13	13	9	9
Q91ZX7	Prolow-density lipoprotein receptor-related protein 1	346.92	504745	19	13	12	11	55800000	54400000	51500000	58	58	40	42	37	Carbamidomethylation; Pyro-glu from Q; Deamidation (NQ)	156.91	31	17	14	25	5690000	8000000	14900000	7	7	4	4	6
Q60715	Prolyl 4-hydroxylase subunit alpha-1	194.88	60910	34	26	19	12	12000000	8620000	6260000	12	12	9	8	5	Carbamidomethylation	77.88	2	1	1	1	238000	178000	261000	2	2	1	1	1
Q9QUR6	Prolyl endopeptidase	307.02	80752	58	46	43	38	56300000	56400000	51300000	29	29	24	22	20	Carbamidomethylation; Pyro-glu from Q; Deamidation (NQ)	148.93	11	8	9	0	786000	436000		4	4	3	3	0
Q61207	Prosaposin	150.73	61422	13	7	11	7	9190000	15100000	12500000	6	6	6	9	6	Carbamidomethylation; Oxidation (M)	129.72	9	9	7	3	1600000	494000	240000	3	3	5	2	1
Q91YR9	Prostaglandin reductase 1	223.52	35560	36	36	25	25	8970000	11400000	9820000	7	7	8	7	5	Carbamidomethylation; Deamidation (NQ)	146.7	14	9	7	7	1950000	1800000	1770000	5	5	3	3	2
P61290	Proteasome activator complex subunit 3	87.27	29506	15	0	15	6		1520000	1890000	3	3	0	3	2	Carbamidomethylation	147.88	15	10	14	11	1600000	3430000	1490000	6	6	3	6	3
Q9R1P4	Proteasome subunit alpha type-1	179.9	29547	53	43	50	35	42200000	41500000	27100000	10	10	9	10	7	Carbamidomethylation; Oxidation (M)	273.75	35	25	27	23	13400000	14700000	9910000	20	17	20	19	19
O70435	Proteasome subunit alpha type-3	116.66	28405	21	5	16	16	0	2630000	1850000	4	4	1	3	3	Deamidation (NQ)	207.72	26	22	26	22	27000000	35500000	28400000	5	5	6	7	6
Q9R1P0	Proteasome subunit alpha type-4	180.95	29471	46	28	24	27	21400000	19100000	14700000	7	7	5	6	6	Carbamidomethylation; Deamidation (NQ)	469.19	40	30	29	29	236000000	248000000	236000000	154	150	117	125	128
Q9Z2U1	Proteasome subunit alpha type-5	207.59	26411	43	31	23	31	28500000	22200000	27700000	8	8	6	5	7	Carbamidomethylation	181.36	20	13	14	14	1560000	1960000	2070000	7	7	4	5	6
Q9QUM9	Proteasome subunit alpha type-6	176.1	27372	40	22	40	24	27800000	36800000	30900000	8	8	4	9	5	Carbamidomethylation	210.75	32	30	32	27	2050000	1050000	1440000	7	3	9	6	7
Q9Z2U0	Proteasome subunit alpha type-7	226.3	27855	60	50	37	48	32800000	24800000	48500000	11	11	11	9	8	Carbamidomethylation	62.38	9	9	9	0	8580000	8000000		2	2	2	0	0
O09061	Proteasome subunit beta type-1	216.39	26372	60	40	60	44	11500000	29300000	16500000	12	12	5	12	8	Carbamidomethylation; Deamidation (NQ)	161.64	41	28	22	22	5000000	5350000	9290000	6	6	7	4	6
Q9R1P3	Proteasome subunit beta type-2	157.96	22906	65	42	46	37	13600000	16200000	16000000	8	8	6	8	5	Carbamidomethylation; Deamidation (NQ)	179.09	42	38	34	35	13500000	16600000	15100000	8	8	7	9	6
Q9R1P1	Proteasome subunit beta type-3	146.23	22965	33	33	26	33	9920000	9860000	10800000	4	4	5	5	6	Pyro-glu from Q	122.75	16	7	10	7	2230000	1040000	4300000	4	4	3	2	3
P99026	Proteasome subunit beta type-4	195.21	29116	45	39	34	42	14300000	11200000	14300000	8	8	9	10	10	Pyro-glu from Q	314.31	67	55	63	58	192000000	226000000	189000000	24	23	33	30	29
Q60692	Proteasome subunit beta type-6	88.8	25379	32	32	9	9	12300000	11800000	14900000	4	4	4	3	3	Carbamidomethylation; Pyro-glu from Q	47.54	2	1	0	1	0		250000	2	2	1	0	1
P70195	Proteasome subunit beta type-7	181.2	29891	47	44	26	25	11000000	7540000	4790000	10	10	8	7	7	Carbamidomethylation; Deamidation (NQ)	326.59	69	61	68	61	2230000	2590000	2090000	25	2	27	31	33
Q9JIF0	Protein arginine N-methyltransferase 1	223.84	42436	40	40	36	27	41800000	28100000	16600000	15	15	17	13	10	Carbamidomethylation; Oxidation (M); Pyro-glu from Q	102.97	12	7	6	7	228000	0	184000	2	2	1	1	1
Q8CIG8	Protein arginine N-methyltransferase 5	81.8	72680	8	7	5	5	2200000	1960000	1960000	4	4	3	2	3		58.79	6	1	1	4	143000	416000	454000	3	3	1	1	2
Q8BXZ1	Protein disulfide-isomerase TMX3	141.46	51848	23	21	10	9	6030000	2910000	2490000	7	7	6	3	2		98.72	18	8	6	4	48900	505000	803000	6	6	2	2	2
Q8C0Z1	Protein FAM234A	122.77	60576	9	9	6	9	4750000	2570000	4700000	3	3	3	4	5		207.25	36	21	9	30	4280000	7400000	17300000	11	11	5	4	11
Q9JJ28	Protein flightless-1 homolog	98.75	144803	5	5	4	2	835000	744000	152000	5	5	4	3	1	Pyro-glu from Q	231.23	50	47	31	35	40400000	41800000	32600000	16	16	15	13	13
Q99JB8	Protein kinase C and casein kinase II substrate protein 3	141.07	48585	13	10	4	6	3460000	1770000	2530000	4	4	3	1	2	Carbamidomethylation	201.63	19	15	9	16	12400000	2740000	9470000	10	10	8	5	9
Q9WVE8	Protein kinase C and casein kinase substrate in neurons protein 2	199.16	55833	36	17	24	20	10400000	14200000	29600000	13	13	5	7	9	Carbamidomethylation	112.96	12	7	2	8	2900000	501000	3650000	6	6	3	1	5
Q3UM45	Protein phosphatase 1 regulatory subunit 7	44.77	41292	8	0	0	8			1340000	2	2	0	0	3		109.2	10	2	9	5	2430000	32600000	16100000	8	6	2	6	4
Q8BK67	Protein RCC2	80.81	55983	8	8	4	1	2450000	2330000	1040000	3	3	3	2	1	Carbamidomethylation	68.92	9	2	5	7	455000	370000	471000	3	3	1	2	2
P08207	Protein S100-A10	129.11	11186	35	35	35	35	126000000	129000000	130000000	3	3	4	6	5	Pyro-glu from E	229.22	31	15	15	18	6360000	1920000	4980000	26	26	9	11	14
P07091	Protein S100-A4	153.16	11721	51	40	32	51	149000000	48500000	55000000	5	5	6	6	7	Carbamidomethylation; Pyro-glu from E	71.2	4	0	2	3		462000	309000	2	2	0	1	2
Q80U72	Protein scribble homolog	103.57	174058	8	3	6	3	37300	560000	253000	7	7	2	5	2		83.62	2	2	1	2	1380000	740000	1560000	2	2	2	1	3
Q01405	Protein transport protein Sec23A	212.98	86162	21	10	16	17	1490000	2540000	2460000	9	6	6	7	8	Carbamidomethylation	304.2	90	90	86	90	160000000	219000000	182000000	15	15	20	21	23
Q3UPL0	Protein transport protein Sec31A	187.33	133569	12	4	6	8	1230000	1760000	3320000	9	9	4	5	6	Carbamidomethylation; Pyro-glu from Q; Deamidation (NQ)	55.91	6	6	0	0	441000			3	3	3	0	0
Q80WQ2	Protein VAC14 homolog	71.17	88048	3	1	3	3	122000	385000	168000	2	2	1	2	2		138.87	2	1	1	1	241000	376000	333000	4	4	2	2	2
P23492	Purine nucleoside phosphorylase	134.88	32277	33	22	27	19	9030000	7170000	6620000	6	6	4	5	4	Carbamidomethylation; Deamidation (NQ)	82.7	2	2	2	2	472000	243000	276000	2	2	2	1	1
P23249	Putative helicase MOV-10	97.29	113583	3	3	2	2	345000	173000	197000	2	2	2	1	1	Pyro-glu from Q	93.62	14	14	7	8	895000	390000	349000	2	2	2	1	1
Q810B6	Rabankyrin-5	76.5	128652	2	2	2	2	6860000	5950000	4940000	2	2	2	3	2		72.32	3	2	3	0	119000	222000		2	2	1	2	0
Q9CQ22	Ragulator complex protein LAMTOR1	147.25	17749	50	42	35	30	2820000	3050000	4320000	7	7	4	5	5		172.24	49	23	41	23	6630000	9550000	6610000	9	9	5	8	5
P34022	Ran-specific GTPase-activating protein	111.91	23596	33	33	33	28	17700000	15500000	9340000	3	3	4	3	3	Carbamidomethylation	81.83	12	12	12	12	655000	659000	500000	2	2	2	2	2
Q01730	Ras suppressor protein 1	166.18	31550	31	31	31	31	10500000	10500000	10200000	4	4	5	4	4		50.63	11	4	0	7	1030000		235000	2	2	1	0	1
P63001	Ras-related C3 botulinum toxin substrate 1	225.09	21450	60	54	60	60	77800000	77500000	73100000	10	9	9	11	10	Carbamidomethylation	134.81	40	25	26	34	24900000	27400000	35300000	5	5	3	3	4
Q99K70	Ras-related GTP-binding protein C	102.1	44121	14	14	12	12	2340000	1810000	2400000	3	3	4	2	3	Carbamidomethylation	215.26	41	41	33	33	33000000	22900000	27100000	15	15	18	16	16
P61027	Ras-related protein Rab-10	234.55	22541	49	49	44	40	40200000	40300000	42700000	9	7	11	10	12		230.9	74	64	64	68	52000000	54300000	41600000	10	8	11	10	10
Q91V41	Ras-related protein Rab-14	192.56	23897	56	50	51	56	22100000	22500000	22900000	9	8	10	10	10	Carbamidomethylation; Pyro-glu from Q; Deamidation (NQ)	217	17	12	12	8	6780000	9090000	5000000	14	14	9	9	6
P35293	Ras-related protein Rab-18	150.68	23035	45	13	33	32	1920000	9880000	6970000	7	6	2	5	5	Carbamidomethylation	114.69	35	19	21	23	5070000	4730000	5460000	7	7	4	4	4
P62821	Ras-related protein Rab-1A	215.25	22678	54	54	45	54	29100000	7260000	31100000	8	3	10	7	12	Pyro-glu from Q	153.18	44	28	37	37	35000000	36700000	50000000	7	7	5	5	7
Q9D1G1	Ras-related protein Rab-1B	212.93	22187	52	52	42	43	10100000	9350000	9490000	8	3	9	7	9	Carbamidomethylation; Pyro-glu from Q	188.76	43	37	43	30	391000000	302000000	326000000	9	9	11	12	10
P35282	Ras-related protein Rab-21	128.64	24106	48	36	34	29	18100000	7540000	5280000	9	8	6	6	5	Carbamidomethylation; Oxidation (M); Deamidation (NQ)	92.66	24	12	11	11	0	738000	609000	4	3	2	2	2
Q6PHN9	Ras-related protein Rab-35	171.75	23025	42	27	27	36	763000	3950000	4270000	6	4	5	6	8	Carbamidomethylation; Pyro-glu from Q	55.95	6	0	3	6		657000	640000	2	2	0	1	2
Q9CQD1	Ras-related protein Rab-5A	141.49	23599	55	37	23	17	3360000	212000	2250000	7	5	6	3	3	Carbamidomethylation; Pyro-glu from Q	101.2	5	4	3	3	1230000	790000	1720000	4	4	3	3	3
P35278	Ras-related protein Rab-5C	195.39	23412	56	38	56	20	9070000	10900000	8270000	8	5	9	9	5	Carbamidomethylation; Pyro-glu from Q	47.52	28	0	28	20		2710000	1900000	2	2	0	2	0
P35279	Ras-related protein Rab-6A	90.65	23590	21	11	5	21	4190000		4670000	3	2	2	1	3		171.64	50	40	25	30	2350000	655000	4790000	7	5	6	4	5
P51150	Ras-related protein Rab-7a	275.35	23490	76	72	76	71	145000000	111000000	153000000	16	16	19	17	18	Carbamidomethylation; Pyro-glu from Q	132.85	19	9	15	19	231000	1020000	2250000	3	3	1	2	3
Q9JIW9	Ras-related protein Ral-B	241.04	23349	47	47	47	46	20400000	19900000	23900000	9	4	13	13	13		213.24	27	18	22	23	7170000	16000000	12700000	9	9	6	10	9
P62835	Ras-related protein Rap-1A	248.34	20987	70	63	56	70	3210000	2640000	3670000	13	3	14	15	14	Carbamidomethylation; Pyro-glu from Q; Deamidation (NQ)	235.59	44	17	15	44	9840000	6890000	17600000	15	15	6	6	16
Q99JI6	Ras-related protein Rap-1b	268.41	20825	70	70	70	70	11300000	11200000	16700000	14	4	17	19	16	Carbamidomethylation; Pyro-glu from Q; Deamidation (NQ)	156.52	12	11	12	8	6120000	7310000	4760000	8	3	8	9	7
P10833	Ras-related protein R-Ras	92.35	23764	28	12	25	21		3680000	4330000	5	3	2	4	4		43.57	11	11	4	4	1670000	1270000	1520000	2	2	2	1	1
P62071	Ras-related protein R-Ras2	177.93	23400	44	44	37	28	19000000	18000000	15900000	9	7	11	10	8	Carbamidomethylation; Pyro-glu from Q	225.69	68	68	62	44	5520000	5380000	5730000	8	3	11	8	11
Q8K2J7	RELT-like protein 1	44.69	29351	8	8	4	4	1430000	191000	818000	2	2	3	1	2		74.76	9	6	6	3	659000	274000	312000	3	3	2	2	2
Q8BHL4	Retinoic acid-induced protein 3	102.28	40101	8	8	4	4	2690000	2160000	1310000	2	2	2	1	1		104.16	9	9	9	9	2430000	3150000	4030000	2	2	2	2	2
Q60875	Rho guanine nucleotide exchange factor 2	94.49	111974	10	6	2	5	1280000	0	508000	5	5	3	1	2	Pyro-glu from Q	102.17	13	4	9	10	1390000	4140000	5480000	7	7	2	6	5
P70336	Rho-associated protein kinase 2	187.62	160585	9	9	4	4	3520000	991000	508000	8	8	8	3	3	Pyro-glu from Q	150.78	40	14	40	21	2880000	9940000	2920000	4	4	1	4	2
P62746	Rho-related GTP-binding protein RhoB	205.69	22123	65	41	43	50	8830000	12800000	10200000	10	7	9	8	10	Carbamidomethylation; Pyro-glu from Q	111.92	32	32	32	32	15700000	12300000	7910000	3	3	4	5	4
Q62159	Rho-related GTP-binding protein RhoC	253.59	22006	66	66	66	66	9410000	11700000	11100000	11	2	15	14	16	Carbamidomethylation; Pyro-glu from Q	268.1	28	21	17	18	17500000	11100000	13500000	23	23	17	13	13
P84096	Rho-related GTP-binding protein RhoG	185.03	21308	46	41	41	45	6790000	4300000	7250000	7	6	6	5	6	Carbamidomethylation	214.38	46	24	24	25	3690000	3470000	3480000	11	11	5	6	6
Q9D7G0	Ribose-phosphate pyrophosphokinase 1	82.91	34834	9	9	9	0	2580000	3310000		2	2	2	2	0	Carbamidomethylation	141.32	38	12	18	33	758000	551000	654000	4	4	2	3	3
Q99PL5	Ribosome-binding protein 1	235.75	172878	12	8	8	10	9790000	8020000	8100000	13	13	11	12	11	Carbamidomethylation; Pyro-glu from Q; Deamidation (NQ)	62.9	12	2	2	12	471000	824000	943000	2	2	1	1	2
Q8VH51	RNA-binding protein 39	69.56	59407	5	2	5	2	792000	2510000	929000	2	2	1	2	1		223	41	23	29	33	493000	1600000	2450000	10	3	6	7	9
O35609	Secretory carrier-associated membrane protein 3	184.67	38458	26	19	13	21	15000000	10700000	17000000	7	7	5	5	6		72.73	2	2	1	1	2510000	1610000	1330000	2	2	2	1	1
Q64105	Sepiapterin reductase	107.79	27883	20	14	15	9	2030000	1770000	2200000	4	4	3	3	2		55.76	8	0	5	3		341000	1890000	2	2	0	1	1
O55131	Septin-7	264.99	50550	36	33	36	33	44600000	36800000	22500000	14	13	17	17	14	Carbamidomethylation; Pyro-glu from Q; Deamidation (NQ)	259.28	32	28	29	23	24200000	22100000	17300000	19	19	16	21	14
Q64337	Sequestosome-1	153.94	48163	22	7	13	17	5680000	5320000	10400000	8	8	3	4	7	Carbamidomethylation	83.29	8	8	3	5	5170000	1630000	5510000	3	3	3	1	2
Q6PDM2	Serine/arginine-rich splicing factor 1	89.87	27745	21	14	11	11	6380000	7450000	7570000	4	4	3	2	2	Carbamidomethylation	206.97	21	15	11	8	2070000	2640000	1160000	11	11	7	6	5
P84104	Serine/arginine-rich splicing factor 3	93.44	19330	21	14	9	16	4780000		332000	3	2	2	1	2		133.22	16	11	8	5	3200000	2100000	4150000	5	5	3	2	2
Q8BL97	Serine/arginine-rich splicing factor 7	92.79	30818	11	5	11	9		1610000	0	3	2	1	3	2		281	32	24	22	17	20000000	22400000	17400000	18	18	14	16	13
Q8CIN4	Serine/threonine-protein kinase PAK 2	55.02	57930	13	6	0	7	618000		644000	4	3	1	0	3		103.93	8	2	7	7	2510000	3970000	4070000	5	5	1	3	4
Q6P1F6	Serine/threonine-protein phosphatase 2A 55 kDa regulatory subunit B alpha isoform	159.49	51692	24	8	15	19	2460000	5080000	4290000	7	7	3	5	5		434.5	53	43	40	46	240000000	214000000	271000000	74	74	67	70	74
Q76MZ3	Serine/threonine-protein phosphatase 2A 65 kDa regulatory subunit A alpha isoform	265.61	65323	52	43	38	25	15100000	24100000	14500000	24	18	23	21	16	Carbamidomethylation; Pyro-glu from Q	190.83	21	15	9	17	13900000	11100000	13400000	11	11	8	5	8
P63330	Serine/threonine-protein phosphatase 2A catalytic subunit alpha isoform	185.79	35608	47	30	47	42	13800000	17100000	15400000	8	7	6	9	8	Carbamidomethylation; Pyro-glu from Q; Deamidation (NQ)	405.27	82	81	82	79	3240000000	2700000000	3090000000	40	16	77	82	68
P26638	Serine--tRNA ligase cytoplasmic	250.81	58389	39	26	32	33	24900000	26300000	26000000	14	14	12	14	12	Carbamidomethylation	333.46	47	38	42	37	101000000	105000000	27400000	25	20	24	28	28
Q99J77	Sialic acid synthase	94.41	40024	27	6	24	3	3590000	4360000	1250000	6	6	2	6	1	Carbamidomethylation	251.61	49	41	29	37	50400000	39500000	51300000	21	21	16	13	16
Q8BMA6	Signal recognition particle subunit SRP68	96.1	70574	11	0	4	11		88400	215000	3	3	0	1	3	Pyro-glu from Q	109.65	11	5	8	6	831000	3070000	1660000	4	4	2	3	2
P70297	Signal transducing adapter molecule 1	119.95	59771	14	0	12	11		2800000	4710000	4	4	0	3	3	Pyro-glu from Q	131.2	24	11	14	24	3390000	4010000	5150000	7	7	3	4	7
Q91Z67	SLIT-ROBO Rho GTPase-activating protein 2	108.65	120798	5	2	3	2	1370000	823000	657000	4	4	2	2	1		199.11	20	14	12	12	4440000	2970000	4150000	10	10	8	6	8
P62317	Small nuclear ribonucleoprotein Sm D2	146.64	13527	32	16	25	24	7430000	7640000	7100000	4	4	2	3	3	Carbamidomethylation	166.62	50	28	50	37	14700000	17400000	13800000	9	7	7	9	8
P62320	Small nuclear ribonucleoprotein Sm D3	104.4	13916	32	24	32	24	2760000	5830000	3320000	3	3	2	3	2	Carbamidomethylation	220.2	53	52	52	53	284000000	277000000	279000000	9	9	13	14	13
Q9CQ65	S-methyl-5'-thioadenosine phosphorylase	192.42	31062	45	34	35	37	12200000	9160000	7870000	8	8	8	7	8	Carbamidomethylation	165.13	14	5	11	12	2720000	4340000	6700000	6	6	3	4	6
O35316	Sodium- and chloride-dependent taurine transporter	76.34	69856	5	1	5	1	10500000	2770000	442000	2	2	1	2	1	Carbamidomethylation	267.07	57	37	40	34	9040000	5350000	8140000	11	11	6	5	9
Q8BTY2	Sodium bicarbonate cotransporter 3	99.31	116514	5	3	5	3	370000	594000	431000	4	4	3	5	3		106.29	14	8	11	11	712000	1770000	2010000	3	3	2	2	2
Q9JIS8	Solute carrier family 12 member 4	143.71	120624	9	5	6	3	1730000	2160000	2240000	7	6	4	4	3		43.93	8	3	0	5	2350000		272000	2	2	1	0	1
Q9WVL3	Solute carrier family 12 member 7	172.3	119481	14	10	10	9	7830000	5490000	6500000	10	9	7	6	6	Carbamidomethylation; Pyro-glu from Q	56.77	8	8	4	0	626000	542000		2	2	2	1	0
Q6P069	Sorcin	118.38	21627	36	20	30	14	10100000	10300000	5620000	6	6	5	6	5	Carbamidomethylation; Deamidation (NQ)	92.02	11	4	11	4	0	296000	186000	2	2	1	3	1
Q9WV80	Sorting nexin-1	93.61	58952	10	2	7	5	2690000	1350000	3920000	4	3	1	3	2		82.36	15	15	7	7	3110000	1510000	1750000	2	2	2	1	1
Q91ZR2	Sorting nexin-18	136.69	67904	9	7	9	3	604000	1080000	667000	3	3	2	3	1	Pyro-glu from Q	132.94	13	6	7	8	1270000	2550000	3490000	7	7	3	4	5
Q6P8X1	Sorting nexin-6	62.29	46649	5	3	5	5	724000	1220000	1030000	2	2	1	2	2		188.78	8	5	7	4	1500000	2810000	1770000	10	10	5	9	5
Q91VH2	Sorting nexin-9	157.4	66546	10	7	10	7	747000	4540000	3350000	3	3	2	4	3	Carbamidomethylation	108.43	21	21	13	7	2810000	2980000	957000	3	3	4	3	1
Q64674	Spermidine synthase	97.16	33995	25	17	10	13	5160000	5160000	3870000	5	5	4	3	3	Carbamidomethylation	146.92	23	11	20	15	3450000	2960000	4070000	7	7	4	5	6
Q9WTX5	S-phase kinase-associated protein 1	142.98	18672	38	29	37	26	4630000	7200000	4480000	5	5	3	4	3		215.29	61	26	38	44	21700000	24800000	23700000	10	10	5	8	10
Q8VIJ6	Splicing factor proline- and glutamine-rich	213.57	75442	19	17	15	14	5810000	6960000	7590000	9	8	7	7	8	Oxidation (M); Pyro-glu from Q; Deamidation (NQ)	45.99	8	0	6	1		107000	405000	3	3	0	2	1
Q9D554	Splicing factor 3A subunit 3	96.25	58842	8	8	4	4	421000	516000	34000	2	2	2	1	1		222.7	31	18	24	18	8070000	11100000	8310000	15	15	9	11	10
Q78PY7	Staphylococcal nuclease domain-containing protein 1	223.76	102088	22	20	18	12	13900000	9410000	7860000	13	13	13	13	8	Carbamidomethylation; Pyro-glu from Q	79.57	3	3	2	1	4090000	2280000	1690000	3	3	3	2	1
O54988	STE20-like serine/threonine-protein kinase	117.33	141457	8	8	5	4	1150000	1520000	1530000	4	4	4	5	3	Deamidation (NQ)	96.05	15	6	6	15	201000	127000	282000	2	2	2	1	3
Q9WUD1	STIP1 homology and U box-containing protein 1	81.46	34909	15	4	12	8	906000	4800000	2760000	4	4	2	3	2	Carbamidomethylation	96.14	13	13	6	13	295000	312000	419000	2	2	2	1	2
Q9R1T2	SUMO-activating enzyme subunit 1	151.8	38620	16	16	16	16	2200000	2590000	2460000	3	3	3	4	4		244.83	36	31	24	26	30900000	17500000	19500000	15	15	15	9	12
Q9Z1F9	SUMO-activating enzyme subunit 2	168.3	70569	16	4	13	11	802000	1770000	5460000	6	6	2	5	4	Pyro-glu from Q	251.72	24	21	17	12	23100000	24500000	20100000	11	11	10	9	8
P35922	Synaptic functional regulator FMR1	69.84	68989	5	5	0	2	337000		200000	2	2	2	0	1		125.75	10	10	10	10	6420000	6380000	7200000	2	2	2	3	2
O09044	Synaptosomal-associated protein 23	189.77	23261	40	37	40	40	10600000	11000000	8970000	6	6	7	7	6		122.95	11	7	3	11	1250000	935000	2250000	3	3	2	1	4
Q9ER00	Syntaxin-12	104.81	31195	16	5	11	11	315000	916000	1240000	3	3	1	2	2	Pyro-glu from Q	153.82	11	9	6	7	1610000	1220000	1040000	4	4	4	2	3
P70452	Syntaxin-4	139	34165	18	12	13	6	5750000	7450000	3930000	4	4	2	3	1		87.18	7	2	5	0	16400	593000		4	4	1	3	0
O88983	Syntaxin-8	91.58	26925	12	8	12	12	701000	631000	167000	2	2	1	2	2	Pyro-glu from Q	73.55	1	1	0	1	839000	94600	275000	4	4	2	1	3
O08599	Syntaxin-binding protein 1	147.75	67569	22	6	19	15	2160000	5120000	3490000	8	8	3	7	6	Carbamidomethylation	89.26	12	9	12	9	2260000	4580000	2040000	2	2	1	2	3
Q60770	Syntaxin-binding protein 3	170.53	67943	20	12	16	18	8380000	11400000	6970000	9	9	6	7	8	Carbamidomethylation	148.57	12	4	7	8	178000	545000	759000	6	6	2	5	5
P26039	Talin-1	458.64	269819	50	38	39	40	170000000	182000000	178000000	84	75	67	79	79	Carbamidomethylation; Pyro-glu from Q; Deamidation (NQ)	149.06	18	15	6	14	5730000	3050000	10500000	4	4	3	1	4
Q71LX4	Talin-2	189.15	253618	7	2	5	4	1720000	95200	0	13	4	5	10	8	Carbamidomethylation; Pyro-glu from Q	162.31	42	32	25	29	2060000	929000	464000	6	4	7	5	5
P47226	Testin	75.36	47983	10	10	4	4	1810000	1230000	601000	2	2	3	2	1	Carbamidomethylation	235.54	23	16	13	14	5160000	2850000	5360000	16	9	10	11	13
O70401	Tetraspanin-6	162.74	27333	17	17	12	17	17600000	10500000	15200000	3	3	5	4	4	Carbamidomethylation	270.14	35	24	19	24	22300000	22500000	43200000	26	24	18	17	21
Q8CDN6	Thioredoxin-like protein 1	166.35	32237	36	14	28	27	5340000	9330000	9570000	6	6	2	5	4	Carbamidomethylation; Pyro-glu from Q	197.4	25	13	18	23	9610000	21700000	24000000	10	10	6	9	9
Q9D0R2	Threonine--tRNA ligase cytoplasmic	202.15	83356	23	15	22	17	14400000	17200000	12000000	12	12	8	13	8	Carbamidomethylation	209.9	20	11	11	12	20400000	11800000	9220000	10	10	7	5	5
Q00609	T-lymphocyte activation antigen CD80	40.24	34590	10	10	10	10	6920000	3890000	4420000	2	2	3	2	2		61.04	6	4	0	3	0		257000	2	2	1	0	1
Q93092	Transaldolase	98.43	37387	25	7	10	22	4520000	8300000	4230000	4	4	2	3	3		51.11	7	0	2	5		36700	39600	2	2	0	1	1
Q62318	Transcription intermediary factor 1-beta	112.86	88847	9	9	0	4	1090000		931000	2	2	2	0	1	Carbamidomethylation	236.38	25	15	15	12	4580000	6130000	4050000	16	16	11	11	9
P42669	Transcriptional activator protein Pur-alpha	113.21	34884	27	18	16	7	1760000	1100000	170000	3	3	2	2	2	Deamidation (NQ)	189.23	37	25	37	37	29700000	28600000	29000000	6	6	6	6	7
O35295	Transcriptional activator protein Pur-beta	249.99	33901	47	31	37	31	7340000	6100000	5290000	7	7	4	5	5		167.44	23	20	19	19	9980000	6760000	2220000	6	6	5	5	4
Q9QUI0	Transforming protein RhoA	260.11	21782	71	65	65	71	26100000	28000000	31700000	12	3	15	14	19	Carbamidomethylation; Pyro-glu from Q	87.6	7	7	4	4	1080000	1150000	958000	2	2	2	1	1
Q01853	Transitional endoplasmic reticulum ATPase	357.18	89322	71	61	55	64	347000000	322000000	318000000	44	43	50	44	51	Carbamidomethylation; Oxidation (M); Pyro-glu from Q; Deamidation (NQ)	181.28	23	17	18	17	9220000	11000000	16900000	10	10	7	8	9
P40142	Transketolase	250.67	67631	38	24	28	26	26000000	20700000	19100000	15	15	11	12	11	Carbamidomethylation	136.59	14	12	6	6	2330000	2770000	2580000	6	6	4	3	3
P58021	Transmembrane 9 superfamily member 2	183.08	75330	19	11	17	15	8770000	14000000	11800000	9	9	5	8	8	Carbamidomethylation	61.42	14	9	5	5	18400	346000	464000	2	2	1	1	1
Q9ET30	Transmembrane 9 superfamily member 3	40.46	67545	3	0	3	0		2280000		2	2	0	2	0	Carbamidomethylation	96.39	8	4	4	0	164000	670000		2	2	1	1	0
Q80X71	Transmembrane protein 106B	142.56	31172	17	15	15	17	5100000	6790000	9320000	5	5	3	4	5	Carbamidomethylation	140.89	32	26	15	15	4070000	1750000	3430000	7	7	6	3	3
Q8BFY9	Transportin-1	146.29	102357	15	8	9	8	1680000	1710000	2900000	9	9	5	4	4	Carbamidomethylation; Pyro-glu from Q	161.05	18	5	10	14	807000	2540000	3150000	8	8	2	5	6
Q64737	Trifunctional purine biosynthetic protein adenosine-3	217.75	107503	19	13	7	16	4400000	2600000	6080000	11	11	9	5	10	Carbamidomethylation	82.53	18	11	11	18	7040000	10100000	12500000	2	2	2	2	2
P68369	Tubulin alpha-1A chain	283.9	50136	57	55	50	50	2960000	2310000	3340000	19	2	23	25	26	Carbamidomethylation; Oxidation (M); Pyro-glu from Q	206.87	49	35	28	32	23000000	31200000	29800000	10	10	8	8	8
Q922F4	Tubulin beta-6 chain	246.75	50090	48	43	36	38	1450000	898000	1580000	17	3	17	15	17	Carbamidomethylation; Deamidation (NQ)	76.7	6	0	2	4		325000	341000	2	2	0	1	1
P83887	Tubulin gamma-1 chain	77.1	51101	12	2	7	4	332000	0	1280000	3	3	1	1	2	Carbamidomethylation	161.28	28	16	21	16	2680000	2300000	1280000	6	6	6	5	3
Q8BYA0	Tubulin-specific chaperone D	105.17	133321	5	2	5	3	56900	3320000	458000	4	4	1	4	3		176.06	23	16	6	13	2510000	965000	3730000	11	11	7	3	8
Q6PB44	Tyrosine-protein phosphatase non-receptor type 23	116.16	185215	4	3	3	4	1100000	1040000	1210000	3	3	2	2	3		90.45	7	3	1	7	728000	159000	1320000	3	3	1	1	3
Q62376	U1 small nuclear ribonucleoprotein 70 kDa	78	51992	5	5	5	2	3290000	3520000	2470000	2	2	2	2	1		175.06	23	12	12	23	8820000	28600000	9130000	4	4	4	4	5
Q62189	U1 small nuclear ribonucleoprotein A	58.46	31835	8	3	8	3	2610000	2220000	2270000	2	2	1	2	1		205.28	29	22	27	20	20600000	30600000	24600000	11	10	9	13	12
Q9JMA1	Ubiquitin carboxyl-terminal hydrolase 14	177.12	56002	26	10	20	21	4920000	9390000	8520000	8	8	3	6	6	Carbamidomethylation	112.3	50	33	47	50	11700000	11900000	12200000	5	5	3	4	5
Q7TQI3	Ubiquitin thioesterase OTUB1	141.66	31270	41	28	38	35	11400000	10600000	12600000	8	8	6	8	8	Pyro-glu from Q	196.18	25	20	20	19	5890000	12300000	10800000	11	6	11	11	10
P62838	Ubiquitin-conjugating enzyme E2 D2	126.55	16735	36	24	24	36	5650000	6620000	7550000	3	3	2	2	4	Carbamidomethylation	188.65	44	28	26	36	10700000	10900000	1310000	7	2	5	6	6
P61079	Ubiquitin-conjugating enzyme E2 D3	126.55	16687	36	24	24	36	5650000	6620000	7550000	3	3	2	2	4	Carbamidomethylation	58.58	21	9	21	9	2250000	1970000	1790000	2	2	2	2	1
P61089	Ubiquitin-conjugating enzyme E2 N	184.48	17138	57	57	57	57	33000000	29300000	22200000	6	5	6	7	6	Carbamidomethylation	208.08	53	44	53	40	27400000	27100000	26600000	11	9	11	11	11
Q9CZY3	Ubiquitin-conjugating enzyme E2 variant 1	74.01	16355	20	20	7	7	12200000	615000	291000	3	3	3	1	1		91.25	16	5	11	5	592000	325000	357000	3	3	1	2	1
Q02053	Ubiquitin-like modifier-activating enzyme 1	342.17	117809	41	38	38	36	77200000	76300000	74900000	28	28	36	34	34	Carbamidomethylation; Pyro-glu from Q	148.49	10	5	6	2	1190000	1420000	716000	11	8	6	7	3
Q8C7R4	Ubiquitin-like modifier-activating enzyme 6	40.57	117966	3	1	3	0	140000	922000		2	2	1	2	0	Carbamidomethylation; Pyro-glu from Q	102.94	5	4	4	2	267000	466000	77500	3	3	2	2	1
O70475	UDP-glucose 6-dehydrogenase	277.8	54832	47	39	41	47	28300000	30200000	34100000	16	16	15	15	18	Carbamidomethylation	142.06	30	20	21	15	8800000	11100000	8170000	6	6	5	5	3
Q3TW96	UDP-N-acetylhexosamine pyrophosphorylase-like protein 1	123.78	56614	14	7	8	14	1280000	1630000	3110000	5	5	2	3	7	Carbamidomethylation	40.4	6	6	0	0	223000			2	2	2	0	0
Q9DBP5	UMP-CMP kinase	91.11	22165	17	17	17	17	2260000	2060000	3460000	3	2	3	3	4		156.06	30	25	18	30	2050000	2800000	7430000	4	4	3	3	5
Q9WTI7	Unconventional myosin-Ic	268.15	121944	34	23	29	29	31800000	39600000	38300000	29	27	21	29	22	Carbamidomethylation; Pyro-glu from Q; Deamidation (NQ)	86.46	16	15	16	0	810000	997000		3	3	0	3	0
Q9JK81	UPF0160 protein MYG1 mitochondrial	149.14	42723	30	16	16	7	2340000	3430000	1850000	7	7	4	4	2	Carbamidomethylation	237.7	22	22	14	14	62700000	47800000	56600000	10	10	12	10	8
P13439	Uridine 5'-monophosphate synthase	78.12	52292	17	10	12	7	483000	1570000	750000	4	4	2	3	2	Carbamidomethylation	259.56	31	27	18	20	34200000	33500000	30700000	14	14	14	12	11
P35456	Urokinase plasminogen activator surface receptor	142.1	35428	10	10	5	10	17100000	7880000	15800000	3	3	2	2	3	Carbamidomethylation	102.26	16	9	16	16	553000	841000	1280000	2	2	1	2	2
P40336	Vacuolar protein sorting-associated protein 26A	156.85	38114	30	26	14	16	2660000	3040000	4220000	7	7	6	3	4	Pyro-glu from Q	164.27	27	16	27	16	127000000	136000000	168000000	4	4	6	5	6
Q9EQH3	Vacuolar protein sorting-associated protein 35	228.55	91713	20	20	15	18	12000000	11300000	13600000	12	12	12	11	13	Carbamidomethylation; Pyro-glu from Q	45.07	14	0	6	8		547000	0	2	2	0	1	1
Q9CR26	Vacuolar protein sorting-associated protein VTA1 homolog	141.43	33913	25	6	17	14	701000	4510000	576000	4	4	1	3	2	Carbamidomethylation; Pyro-glu from Q	108.34	56	34	6	16	709000	186000	657000	6	6	3	1	2
P70460	Vasodilator-stimulated phosphoprotein	84.86	39667	13	7	13	7	1080000	908000	735000	3	3	2	2	1	Carbamidomethylation	220.93	10	6	6	8	5590000	7790000	7550000	18	18	11	11	16
O88384	Vesicle transport through interaction with t-SNAREs homolog 1B	65.41	26713	13	9	9	4	0	198000	1400000	2	2	2	1	1		69.6	17	8	8	17	727000	706000	631000	2	2	1	1	2
Q8VDJ3	Vigilin	215.76	141742	16	7	8	15	4500000	5730000	8000000	12	12	5	6	11	Carbamidomethylation	284.8	26	22	18	21	30600000	33400000	32000000	20	20	18	15	16
P20152	Vimentin	352.02	53688	69	67	65	69	1350000000	1470000000	1510000000	50	47	67	68	72	Carbamidomethylation; Oxidation (M); Pyro-glu from E; Pyro-glu from Q; Deamidation (NQ)	211.57	53	29	36	40	48100000	58400000	63200000	9	9	8	6	9
O08532	Voltage-dependent calcium channel subunit alpha-2/delta-1	106.3	124630	8	5	1	2	1820000	458000	627000	6	6	4	1	2	Carbamidomethylation	262.39	44	22	26	20	11600000	6970000	9340000	20	20	13	10	11
P50516	V-type proton ATPase catalytic subunit A	236.11	68326	29	22	14	26	8760000	9310000	13900000	13	13	9	8	12	Carbamidomethylation	139.21	18	7	11	7	522000	413000	1290000	5	5	2	3	2
P62814	V-type proton ATPase subunit B brain isoform	233.03	56551	48	30	33	28	18400000	15000000	7850000	15	15	11	13	8	Carbamidomethylation; Oxidation (M); Pyro-glu from Q; Deamidation (NQ)	46.38	9	4	5	9	0	1380000	1580000	2	2	1	1	2
P57746	V-type proton ATPase subunit D	79.28	28369	16	5	5	16	473000	729000	1990000	3	3	1	1	3		229.7	40	40	40	37	38400000	33400000	26200000	8	8	10	11	9
P51863	V-type proton ATPase subunit d 1	146.05	40301	19	11	11	15	2700000	1840000	2270000	4	4	2	2	3	Carbamidomethylation	135.85	7	7	3	3	435000	229000	318000	4	4	5	2	3
P50518	V-type proton ATPase subunit E 1	120.22	26157	19	19	19	19	4940000	3920000	4220000	3	3	4	3	3		277.73	45	43	43	39	65500000	61700000	54800000	16	14	17	18	14
Q8BVE3	V-type proton ATPase subunit H	94.02	55855	13	5	3	8	885000	363000	1980000	4	4	2	1	2	Carbamidomethylation	170.37	19	9	16	11	1600000	3810000	4170000	7	7	3	6	5
Q6PGL7	WASH complex subunit 2	132.8	145310	4	3	3	3	1960000	1050000	1150000	3	3	3	3	3		126.11	10	1	4	7	732000	1130000	2980000	7	7	1	3	5
Q3UMB9	WASH complex subunit 4	174.38	136370	9	4	6	6	847000	2040000	2280000	6	6	4	6	5	Deamidation (NQ)	118.1	12	10	5	3	589000	618000	183000	4	4	4	3	1
Q8C2E7	WASH complex subunit 5	154.19	134110	9	7	6	7	2070000	2340000	2610000	7	7	5	7	5	Carbamidomethylation	134.89	12	11	7	7	2880000	1890000	1520000	4	4	3	2	3
Q9ERF3	WD repeat-containing protein 61	148	33773	19	13	7	19	763000	196000	329000	3	3	2	1	3		254.78	59	53	51	55	8610000	13300000	11600000	15	9	15	12	16
Q8BH43	Wiskott-Aldrich syndrome protein family member 2	133.31	54074	14	9	14	6	5960000	6640000	3220000	6	6	4	6	3	Carbamidomethylation	96.57	9	2	6	3	239000	920000	171000	3	3	1	2	1
Q6P1B1	Xaa-Pro aminopeptidase 1	175.48	69591	18	13	17	13	7690000	6430000	7500000	8	8	7	8	6	Carbamidomethylation; Pyro-glu from Q	219.29	21	13	14	14	2590000	4160000	3360000	11	11	6	7	7
Q9JKB3	Y-box-binding protein 3	235.53	38814	36	31	28	26	7600000	9680000	8400000	11	7	13	17	11	Deamidation (NQ)	125.69	7	6	2	4	1660000	1160000	899000	5	5	4	2	3

## Sheet: Unique EVS proteins
Accession	Description	-10lgP	Coverage (%)	Coverage (%) Sample 1	Coverage (%) Sample 2	Coverage (%) Sample 3	Area Sample 1	Area Sample 2	Area Sample 3	#Peptides	#Unique	#Spec Sample 1	#Spec Sample 2	#Spec Sample 3	PTM	Avg. Mass
A2A432	Cullin-4B	77.37	6	4	1	3	937000	912000	1050000	3	2	2	1	2	Carbamidomethylation	110699
A2A7S8	Uncharacterized protein KIAA1522	81.58	3	2	0	1	110000		104000	2	2	1	0	1		104842
A2AGT5	Cytoskeleton-associated protein 5	123.69	3	3	2	2	1010000	588000	298000	4	4	3	3	2		225633
A2AKG8	Focadhesin	64.66	2	0	2	1		105000	60000	2	2	0	2	1	Pyro-glu from Q	198948
D3Z7P3	Glutaminase kidney isoform mitochondrial	100.31	9	6	4	9	929000	198000	689000	3	3	2	1	3	Pyro-glu from Q	73964
E2JF22	Piezo-type mechanosensitive ion channel component 1	76.94	1	0	1	1		123000	141000	2	2	0	1	1	Carbamidomethylation; Pyro-glu from Q	292000
E9Q557	Desmoplakin	78.82	2	2	2	0	2530000	2440000		4	3	4	1	1	Deamidation (NQ)	332913
E9Q5C9	Nucleolar and coiled-body phosphoprotein 1	62.4	4	2	2	4	197000	192000	552000	2	2	1	1	2		73698
E9Q5G3	Kinesin-like protein KIF23	116.76	5	4	2	4	2930000	779000	1070000	4	4	3	1	2		108776
O08528	Hexokinase-2	45.48	3	0	3	3		1330000	1020000	2	2	0	0	3	Deamidation (NQ)	102535
O08530	Sphingosine 1-phosphate receptor 1	46.79	6	4	2	2	265000	824000	742000	2	2	1	1	1		42639
O08547	Vesicle-trafficking protein SEC22b	90.48	15	15	7	7	1560000	1470000	1240000	2	2	2	1	1		24741
O08579	Emerin	47.05	10	5	0	4	964000		234000	2	2	2	0	1		29436
O08583	THO complex subunit 4	96.8	15	15	10	10	587000	253000	294000	2	2	3	1	1		26940
O08638	Myosin-11	217.7	6	4	5	5		312000	1190000	12	2	13	14	16	Carbamidomethylation; Pyro-glu from Q; Deamidation (NQ)	227026
O08749	Dihydrolipoyl dehydrogenase mitochondrial	184.65	22	18	13	18	6170000	6140000	6280000	7	7	5	4	5	Carbamidomethylation	54272
O08795	Glucosidase 2 subunit beta	124.18	12	5	7	12	6870000	6560000	6450000	4	4	2	3	4	Carbamidomethylation; Deamidation (NQ)	58793
O08807	Peroxiredoxin-4	205.25	49	49	42	44	29300000	27700000	25100000	10	8	18	13	12	Carbamidomethylation; Pyro-glu from Q; Deamidation (NQ)	31053
O08808	Protein diaphanous homolog 1	83.28	6	4	2	2	212000	164000	40500	3	3	2	1	1	Carbamidomethylation	139343
O08915	AH receptor-interacting protein	38.81	9	0	4	9		216000	1130000	2	2	0	1	2		37605
O08997	Copper transport protein ATOX1	60.68	38	26	12	12	153000	2290000	1940000	2	2	1	1	1	Carbamidomethylation	7338
O09005	Sphingolipid delta(4)-desaturase DES1	104.33	16	5	11	10	1330000	4740000	2780000	3	3	1	2	2		38241
O35074	Prostacyclin synthase	137.3	20	10	8	13	3060000	1440000	2860000	7	7	4	2	5		57047
O35129	Prohibitin-2	196.83	49	37	35	36	18600000	21700000	17200000	13	13	9	10	10	Deamidation (NQ)	33296
O35250	Exocyst complex component 7	98.73	8	2	6	2	228000	262000	412000	3	3	1	3	1	Deamidation (NQ)	79960
O35326	Serine/arginine-rich splicing factor 5	63.09	10	10	6	0	1060000	1010000		2	2	2	1	0		30891
O35344	Importin subunit alpha-4	187.76	41	23	28	14	2270000	4400000	1430000	10	9	5	7	3	Carbamidomethylation	57773
O35350	Calpain-1 catalytic subunit	96.33	11	6	7	5	1450000	1770000	1310000	5	5	2	3	3		82106
O35381	Acidic leucine-rich nuclear phosphoprotein 32 family member A	133.3	23	23	4	23	4330000	1850000	4810000	3	3	3	1	3	Carbamidomethylation	28538
O35643	AP-1 complex subunit beta-1	226.48	24	17	13	19	4450000	2190000	2580000	14	7	9	8	10	Carbamidomethylation	103935
O35658	Complement component 1 Q subcomponent-binding protein mitochondrial	169.76	54	49	40	30	16000000	14700000	6960000	7	7	6	5	5	Carbamidomethylation; Deamidation (NQ)	31013
O35841	Apoptosis inhibitor 5	183.29	20	15	20	15	1110000	1820000	1140000	5	5	3	5	3	Carbamidomethylation; Pyro-glu from Q	56785
O35864	COP9 signalosome complex subunit 5	76.6	20	2	9	13	758000	264000	4710000	5	5	1	2	4		37549
O35887	Calumenin	238.51	56	46	31	41	26300000	27400000	21000000	12	12	13	8	12		37064
O35900	U6 snRNA-associated Sm-like protein LSm2	64.98	28	20	28	20	772000	128000	0	2	2	1	2	1		10835
O54734	Dolichyl-diphosphooligosaccharide--protein glycosyltransferase 48 kDa subunit	200.96	42	27	31	31	34700000	51300000	33400000	12	12	9	10	9	Carbamidomethylation	49028
O54774	AP-3 complex subunit delta-1	170.91	10	8	7	6	2230000	2310000	864000	7	7	6	5	4	Carbamidomethylation	135081
O54901	OX-2 membrane glycoprotein	57.02	8	0	8	4		2230000	1300000	2	2	0	2	1		31256
O54984	ATPase Asna1	72.65	9	4	7	2	617000	1600000	433000	3	3	1	2	1	Carbamidomethylation	38823
O55022	Membrane-associated progesterone receptor component 1	202.74	43	43	42	27	17800000	14900000	8180000	6	5	8	5	5	Carbamidomethylation; Deamidation (NQ)	21694
O55023	Inositol monophosphatase 1	60.99	11	0	4	11		1450000	3430000	3	3	0	1	3		30436
O55106	Striatin	74.65	6	5	0	3	205000		105000	3	3	2	0	1		85966
O55143	Sarcoplasmic/endoplasmic reticulum calcium ATPase 2	234.95	20	17	16	15	5210000	4820000	10400000	15	9	12	12	13	Carbamidomethylation; Deamidation (NQ)	114858
O55234	Proteasome subunit beta type-5	196.35	35	27	31	26	35200000	31800000	41500000	10	10	9	9	9		28532
O55242	Sigma non-opioid intracellular receptor 1	102.48	11	5	11	11	1380000	3420000	3480000	2	2	1	2	2	Pyro-glu from Q	25250
O70152	Dolichol-phosphate mannosyltransferase subunit 1	53.96	13	13	5	5	963000	128000	122000	2	2	2	1	1		29175
O70252	Heme oxygenase 2	92.45	19	0	13	13		2410000	3050000	3	3	0	2	2		35739
O70309	Integrin beta-5	152.11	15	9	11	9	874000	3040000	1820000	7	7	4	5	5	Carbamidomethylation	87909
O70378	ER membrane protein complex subunit 8	58.55	17	5	12	0	694000	2530000		3	3	1	2	0		23348
O70400	PDZ and LIM domain protein 1	136.36	32	27	23	23	7050000	5160000	3080000	6	6	7	5	5	Carbamidomethylation; Pyro-glu from Q	35774
O70404	Vesicle-associated membrane protein 8	86.52	14	14	14	14	382000	11500000	9270000	2	2	1	3	2		11451
O70439	Syntaxin-7	95.63	20	14	5	6	1410000	555000	818000	3	3	2	1	1		29821
O70503	Very-long-chain 3-oxoacyl-CoA reductase	176.72	49	40	38	41	24200000	23300000	32300000	12	12	10	9	11	Carbamidomethylation	34742
O88485	Cytoplasmic dynein 1 intermediate chain 1	127.37	12	6	6	3	0	519000	0	4	3	2	3	1	Carbamidomethylation	70725
O88587	Catechol O-methyltransferase	155.12	30	30	24	24	2470000	2520000	1680000	4	4	5	4	5	Carbamidomethylation	29486
O88643	Serine/threonine-protein kinase PAK 1	81.17	10	3	3	8	866000	921000	1920000	4	3	1	1	3		60737
O88653	Ragulator complex protein LAMTOR3	89.75	44	22	31	31	4340000	3550000	5970000	3	3	2	2	2		13553
O88952	Protein lin-7 homolog C	81.96	13	13	13	13	3830000	1950000	5280000	2	2	3	2	2		21834
O89023	Tripeptidyl-peptidase 1	93.81	10	4	10	4	168000	1330000	217000	3	3	1	3	1		61342
O89086	RNA-binding protein 3	105.08	30	21	30	30	5080000	6270000	7130000	2	2	1	2	2		16605
P03921	NADH-ubiquinone oxidoreductase chain 5	91.34	5	3	5	3	581000	618000	600000	2	2	1	2	1		68475
P05201	Aspartate aminotransferase cytoplasmic	233.36	40	34	40	25	27600000	30700000	17900000	13	13	12	14	9	Carbamidomethylation	46248
P05202	Aspartate aminotransferase mitochondrial	226.41	43	28	32	30	27000000	33700000	30700000	14	14	9	9	11	Carbamidomethylation; Deamidation (NQ)	47411
P06797	Cathepsin L1	77.63	10	10	10	10	545000	2010000	1940000	2	2	2	3	2	Carbamidomethylation; Pyro-glu from E; Deamidation (NQ)	37547
P07214	SPARC	130.77	17	9	14	14	3600000	9900000	9430000	5	5	2	4	4	Carbamidomethylation	34450
P08003	Protein disulfide-isomerase A4	257.7	39	29	27	29	56600000	39600000	42500000	21	21	17	16	18	Pyro-glu from Q; Deamidation (NQ)	71982
P09671	Superoxide dismutase [Mn] mitochondrial	127.48	19	13	19	19	3910000	4730000	5550000	3	3	2	3	4		24603
P11157	Ribonucleoside-diphosphate reductase subunit M2	65.78	6	6	3	3	3070000	1320000	1240000	2	2	2	1	1		45096
P12023	Amyloid-beta A4 protein	47.05	3	2	1	0	0	346000		2	2	1	1	0	Deamidation (NQ)	86722
P12367	cAMP-dependent protein kinase type II-alpha regulatory subunit	89.38	12	4	8	12	125000	104000	311000	3	2	1	2	3	Pyro-glu from Q	45389
P12787	Cytochrome c oxidase subunit 5A mitochondrial	78.13	38	21	32	38	1150000	2150000	4030000	4	4	1	3	4		16101
P14094	Sodium/potassium-transporting ATPase subunit beta-1	117.93	16	8	9	8	2890000	4460000	3100000	4	4	2	2	2	Carbamidomethylation	35195
P14733	Lamin-B1	184.26	24	14	15	13	8760000	4720000	6060000	10	10	7	6	6	Deamidation (NQ)	66786
P15208	Insulin receptor	51.52	5	0	3	2		205000	59300	3	3	0	2	1	Carbamidomethylation	155610
P15532	Nucleoside diphosphate kinase A	210.39	62	57	62	60	29400000	32200000	24000000	9	4	9	10	12	Carbamidomethylation; Oxidation (M)	17208
P15535	Beta-1 4-galactosyltransferase 1	47.75	6	2	0	6	261000		532000	2	2	1	0	2		44411
P16254	Signal recognition particle 14 kDa protein	60.99	24	13	13	24	837000	978000	171000	2	2	1	1	2		12510
P16330	2' 3'-cyclic-nucleotide 3'-phosphodiesterase	81.32	10	3	10	0	135000	497000		2	2	1	2	0	Carbamidomethylation	47123
P16675	Lysosomal protective protein	89.32	6	0	2	4		254000	2280000	2	2	0	1	1	Carbamidomethylation	53844
P17047	Lysosome-associated membrane glycoprotein 2	98.79	9	9	4	4	36400000	17000000	16500000	4	4	4	2	2		45681
P17439	Lysosomal acid glucosylceramidase	86.09	12	6	9	3	1170000	1150000	587000	3	3	2	2	1		57622
P17710	Hexokinase-1	181.3	15	9	10	7	5810000	5080000	3310000	12	12	7	9	7	Carbamidomethylation	108303
P18052	Receptor-type tyrosine-protein phosphatase alpha	60.37	4	4	3	0	204000	167000		2	2	2	0	0	Carbamidomethylation; Pyro-glu from Q	93698
P19536	Cytochrome c oxidase subunit 5B mitochondrial	83.08	23	14	9	14	3490000	1850000	3960000	2	2	1	1	1		13813
P19783	Cytochrome c oxidase subunit 4 isoform 1 mitochondrial	58.31	18	0	7	18		2720000	3590000	2	2	0	1	2		19530
P20108	Thioredoxin-dependent peroxide reductase mitochondrial	152.14	33	33	25	10	10500000	8750000	4060000	6	6	9	5	3	Carbamidomethylation; Deamidation (NQ)	28127
P20352	Tissue factor	89.45	9	9	6	6	1730000	1300000	741000	2	2	2	1	1		32935
P22437	Prostaglandin G/H synthase 1	184.21	31	21	25	19	20400000	13500000	13800000	11	11	13	11	10	Carbamidomethylation; Pyro-glu from Q; Deamidation (NQ)	69042
P22892	AP-1 complex subunit gamma-1	83.52	4	2	1	3	1550000	697000	1520000	3	3	2	1	2	Carbamidomethylation	91350
P24270	Catalase	188.23	23	19	13	13	5620000	4570000	4250000	8	8	7	5	5	Carbamidomethylation; Deamidation (NQ)	59795
P24288	Branched-chain-amino-acid aminotransferase cytosolic	131.06	16	13	6	11	7900000	3150000	3540000	5	5	5	3	4	Carbamidomethylation; Pyro-glu from Q; Deamidation (NQ)	42791
P24369	Peptidyl-prolyl cis-trans isomerase B	170.03	41	28	35	40	8980000	20900000	24200000	10	10	5	9	8	Deamidation (NQ)	23713
P26350	Prothymosin alpha	157.22	41	29	41	27	2340000	4780000	3930000	6	6	4	6	3	Deamidation (NQ)	12254
P26369	Splicing factor U2AF 65 kDa subunit	82.29	7	7	0	2	1760000		922000	3	3	3	0	1		53517
P26443	Glutamate dehydrogenase 1 mitochondrial	238.92	29	15	22	20	14700000	14900000	14500000	12	12	9	9	8	Carbamidomethylation; Deamidation (NQ)	61337
P27612	Phospholipase A-2-activating protein	149.58	14	8	8	12	676000	638000	1190000	6	6	4	4	5	Carbamidomethylation; Deamidation (NQ)	87221
P27661	Histone H2AX	171.02	48	48	27	27	21500000	20300000	22200000	6	4	9	7	7		15143
P28798	Progranulin	91.78	5	0	2	5		144000	580000	2	2	0	1	2	Carbamidomethylation; Pyro-glu from Q	63458
P29758	Ornithine aminotransferase mitochondrial	224.41	45	37	26	25	15600000	8900000	10300000	12	12	14	8	8	Carbamidomethylation; Oxidation (M); Deamidation (NQ)	48355
P30681	High mobility group protein B2	51.25	20	7	13	20	614000	854000	857000	3	2	1	2	3	Carbamidomethylation	24162
P31324	cAMP-dependent protein kinase type II-beta regulatory subunit	93.18	17	9	8	8	738000	144000	582000	5	4	2	2	2	Carbamidomethylation	46167
P35235	Tyrosine-protein phosphatase non-receptor type 11	111.89	14	11	0	3	559000		803000	5	5	4	0	1	Carbamidomethylation; Pyro-glu from Q	68460
P35505	Fumarylacetoacetase	84.31	10	4	7	10	1230000	1100000	1960000	3	3	1	2	3		46176
P35585	AP-1 complex subunit mu-1	89.84	9	9	3	3	1190000	773000	1590000	2	2	2	1	1		48543
P37040	NADPH--cytochrome P450 reductase	151.43	21	5	15	16	1360000	7640000	5680000	8	8	3	6	6	Carbamidomethylation	77044
P37804	Transgelin	83.51	21	11	5	14	1770000	96200	5280000	4	4	2	1	3	Pyro-glu from Q	22576
P42567	Epidermal growth factor receptor substrate 15	79.93	6	3	3	4	1100000	1130000	941000	3	3	2	2	2		98471
P43277	Histone H1.3	122.81	11	11	11	10	3730000	2350000	0	3	2	4	3	2		22100
P45878	Peptidyl-prolyl cis-trans isomerase FKBP2	150.3	39	39	39	29	5430000	5260000	5120000	3	3	4	3	3		15344
P45952	Medium-chain specific acyl-CoA dehydrogenase mitochondrial	115.32	11	11	11	7	628000	529000	531000	2	2	2	2	1		46481
P46460	Vesicle-fusing ATPase	58.39	5	2	2	2	923000	568000	589000	3	3	1	1	1	Carbamidomethylation	82613
P46978	Dolichyl-diphosphooligosaccharide--protein glycosyltransferase subunit STT3A	173.62	13	9	9	6	4720000	7360000	2350000	8	7	5	6	3		80598
P47199	Quinone oxidoreductase	75.26	11	0	11	0		1290000		2	2	0	2	0		35269
P47738	Aldehyde dehydrogenase mitochondrial	194.65	31	25	17	20	8770000	6490000	7680000	11	10	9	7	7	Carbamidomethylation	56538
P47758	Signal recognition particle receptor subunit beta	160.66	25	19	18	25	1920000	2060000	3370000	5	5	3	3	5		29579
P47877	Insulin-like growth factor-binding protein 2	100.93	19	6	10	15	886000	1080000	1880000	4	4	1	2	3	Carbamidomethylation	32847
P48024	Eukaryotic translation initiation factor 1	129.83	59	38	47	47	2300000	2970000	3740000	4	4	3	3	4	Carbamidomethylation; Deamidation (NQ)	12747
P48962	ADP/ATP translocase 1	250.79	57	48	47	57	34800000	38100000	38100000	17	7	15	15	18	Carbamidomethylation; Pyro-glu from Q	32904
P49442	Inositol polyphosphate 1-phosphatase	72.62	6	0	3	6		442000	470000	2	2	0	1	2	Pyro-glu from Q	43346
P49722	Proteasome subunit alpha type-2	230.6	46	41	46	43	36700000	49200000	33300000	9	9	8	12	10	Deamidation (NQ)	25927
P50096	Inosine-5'-monophosphate dehydrogenase 1	60.37	10	0	6	4		1710000	305000	3	3	0	2	2		55279
P50396	Rab GDP dissociation inhibitor alpha	279.68	46	36	42	42	17700000	14700000	11800000	15	9	17	16	14	Carbamidomethylation; Pyro-glu from Q; Deamidation (NQ)	50522
P50544	Very long-chain specific acyl-CoA dehydrogenase mitochondrial	102.54	12	0	12	9		27300000	10800000	5	5	0	4	3		70876
P50637	Translocator protein	151.64	37	37	37	36	14600000	15100000	10900000	4	4	5	6	4		18841
P51125	Calpastatin	226.88	31	23	27	16	11200000	8480000	4570000	12	12	10	11	8	Pyro-glu from Q; Deamidation (NQ)	84922
P51174	Long-chain specific acyl-CoA dehydrogenase mitochondrial	86.27	6	6	6	6	4290000	4720000	4060000	2	2	2	2	2		47908
P51855	Glutathione synthetase	82.35	7	2	5	4	852000	2010000	1700000	3	3	1	2	2		52247
P51881	ADP/ATP translocase 2	244.85	48	41	43	42	57200000	62900000	33000000	16	6	14	14	14	Carbamidomethylation; Pyro-glu from Q	32931
P52019	Squalene monooxygenase	93.51	5	3	3	0	404000	421000		2	2	1	1	0		63770
P52480	Pyruvate kinase PKM	398.65	66	60	56	59	874000000	875000000	861000000	39	38	54	46	49	Carbamidomethylation; Oxidation (M); Deamidation (NQ)	57845
P53026	60S ribosomal protein L10a	157.58	31	19	20	25	58500000	57000000	43100000	7	7	6	6	6	Carbamidomethylation	24916
P53690	Matrix metalloproteinase-14	129.51	17	5	13	6	3420000	5480000	4660000	8	8	2	6	3	Pyro-glu from Q	65919
P53810	Phosphatidylinositol transfer protein alpha isoform	126.47	20	11	20	20	655000	2040000	4270000	3	3	1	2	4		31893
P53811	Phosphatidylinositol transfer protein beta isoform	67.35	17	8	12	4	2330000	1580000	1430000	3	3	2	2	1	Carbamidomethylation	31487
P53996	Cellular nucleic acid-binding protein	94.28	17	8	17	17	2180000	2340000	1780000	2	2	1	2	2	Carbamidomethylation	19592
P54071	Isocitrate dehydrogenase [NADP] mitochondrial	159.87	28	24	22	17	7400000	5080000	6670000	11	10	9	8	7	Deamidation (NQ)	50906
P54726	UV excision repair protein RAD23 homolog A	113.81	19	19	17	17	760000	610000	772000	3	2	3	2	2	Pyro-glu from Q	39707
P54728	UV excision repair protein RAD23 homolog B	182.7	48	18	33	41	6170000	16100000	13800000	12	11	8	11	13	Carbamidomethylation; Oxidation (M); Pyro-glu from Q	43513
P54731	FAS-associated factor 1	46.47	5	0	5	5		299000	367000	2	2	0	0	2		73863
P54822	Adenylosuccinate lyase	167.01	35	26	14	23	9760000	5570000	9290000	10	10	8	5	7	Carbamidomethylation; Pyro-glu from Q	54866
P55258	Ras-related protein Rab-8A	116.26	23	23	18	11	2870000	3930000		4	2	4	3	3		23668
P55302	Alpha-2-macroglobulin receptor-associated protein	123.91	13	7	13	4	1600000	2490000	1040000	4	4	2	4	1		42215
P56391	Cytochrome c oxidase subunit 6B1	62.1	29	29	16	16	2120000	1040000	1170000	2	2	2	1	1	Carbamidomethylation	10071
P56395	Cytochrome b5	82.44	25	25	16	0	2920000	3050000		2	2	3	3	0		15241
P56812	Programmed cell death protein 5	93.65	37	20	19	19	1760000	1380000	1090000	4	4	2	2	2		14275
P57759	Endoplasmic reticulum resident protein 29	106.32	22	7	7	22	4210000	4410000	8230000	5	5	2	2	5	Carbamidomethylation	28823
P58044	Isopentenyl-diphosphate Delta-isomerase 1	133.65	25	15	19	19	592000	3580000	3460000	4	4	2	3	3		26289
P58389	Serine/threonine-protein phosphatase 2A activator	100.48	12	0	3	12		1080000	3450000	2	2	0	1	2		36710
P58771	Tropomyosin alpha-1 chain	265.66	38	37	32	32	15800000	25600000	24200000	16	5	20	19	25	Carbamidomethylation; Pyro-glu from Q	32681
P58774	Tropomyosin beta chain	210.5	43	18	24	33	4610000	8650000	12500000	12	7	7	10	12	Carbamidomethylation; Pyro-glu from Q	32837
P58871	182 kDa tankyrase-1-binding protein	124.47	3	2	2	2	655000	1220000	645000	3	3	2	2	3		181824
P60670	Nuclear protein localization protein 4 homolog	79.18	12	9	0	6	856000		629000	3	3	2	0	2		68017
P61022	Calcineurin B homologous protein 1	90.46	23	10	23	6	4450000	7440000	2590000	4	4	2	5	1		22432
P61620	Protein transport protein Sec61 subunit alpha isoform 1	224.28	36	33	29	29	12800000	6030000	4970000	11	7	12	11	9	Carbamidomethylation; Oxidation (M)	52265
P61759	Prefoldin subunit 3	132.8	21	16	21	12	2100000	3160000	2500000	3	3	2	3	2	Carbamidomethylation	22436
P61924	Coatomer subunit zeta-1	104.36	41	12	19	17	3180000	80900	2700000	4	4	2	1	2		20198
P61971	Nuclear transport factor 2	54.25	34	0	13	21		905000	1100000	2	2	0	1	1	Carbamidomethylation	14478
P62627	Dynein light chain roadblock-type 1	101.67	29	29	29	17	6660000	6800000	2590000	2	2	2	2	1		10990
P62743	AP-2 complex subunit sigma	64.87	20	0	14	6		2530000	187000	3	3	0	2	1		17018
P62774	Myotrophin	127.07	32	14	32	14	6470000	9150000	7880000	2	2	1	3	1	Carbamidomethylation	12861
P62869	Elongin-B	106.75	43	26	29	36	8380000	7440000	10300000	5	5	3	3	4	Carbamidomethylation	13170
P62897	Cytochrome c somatic	89.49	39	39	38	8	2560000	2020000	1410000	4	4	4	3	1		11605
P63158	High mobility group protein B1	111.12	34	13	27	18	4920000	4690000	4450000	5	4	3	3	3	Carbamidomethylation	24894
P67778	Prohibitin	214.96	71	48	51	61	31200000	26700000	34600000	13	13	11	11	12	Carbamidomethylation; Deamidation (NQ)	29820
P67871	Casein kinase II subunit beta	84.08	19	7	19	19	2500000	5030000	4710000	3	3	1	3	3	Carbamidomethylation	24942
P70207	Plexin-A2	53.24	2	2	1	0	376000	74600		2	2	1	1	0		211533
P70245	3-beta-hydroxysteroid-Delta(8) Delta(7)-isomerase	97.23	10	4	4	10	3060000	2850000	3090000	2	2	1	1	2		26215
P70362	Ubiquitin recognition factor in ER-associated degradation protein 1	51.66	10	5	0	5	356000		1160000	2	2	1	0	1		34481
P70372	ELAV-like protein 1	65.86	11	0	7	11		2020000	4780000	3	3	0	2	3		36169
P70441	Na(+)/H(+) exchange regulatory cofactor NHE-RF1	102.35	14	6	6	14	2470000	2130000	5130000	3	3	1	1	3		38600
P70677	Caspase-3	79.08	18	12	6	0	1250000	418000		3	3	2	1	0		31475
P81117	Nucleobindin-2	41.22	5	5	2	0	603000	487000		2	2	2	1	0		50305
P82347	Delta-sarcoglycan	81.42	14	9	10	9	2240000	2240000	2360000	3	3	2	2	2		32133
P83940	Elongin-C	106.91	41	23	29	41	3170000	4810000	5350000	3	3	2	2	3	Carbamidomethylation	12473
P84089	Enhancer of rudimentary homolog	43.48	27	0	0	27			1300000	2	2	0	0	2	Carbamidomethylation	12259
P97346	Nucleoredoxin	68.55	6	0	5	6		457000	525000	2	2	0	1	1		48344
P97363	Serine palmitoyltransferase 2	142.82	15	8	10	7	1740000	1870000	1680000	5	5	3	3	2		62982
P97371	Proteasome activator complex subunit 1	123.44	23	14	14	17	580000	1800000	516000	3	3	2	3	2	Pyro-glu from Q	28673
P97372	Proteasome activator complex subunit 2	119.5	16	16	16	16	847000	668000	668000	2	2	5	3	3	Carbamidomethylation; Pyro-glu from Q	27057
P97379	Ras GTPase-activating protein-binding protein 2	80.85	8	6	2	2	578000	162000	646000	2	2	1	1	1		54088
P97434	Myosin phosphatase Rho-interacting protein	56.3	4	1	4	0	137000	554000		3	3	1	3	0		116408
P97450	ATP synthase-coupling factor 6 mitochondrial	62.62	34	34	21	21	2070000	859000	675000	2	2	2	1	1		12496
P97493	Thioredoxin mitochondrial	120.13	42	17	24	33	3240000	2690000	3120000	4	4	2	2	3		18255
P97822	Acidic leucine-rich nuclear phosphoprotein 32 family member E	123.95	19	12	12	19	2730000	2280000	2420000	3	3	3	2	3	Carbamidomethylation	29622
P97823	Acyl-protein thioesterase 1	106.76	21	6	21	11	436000	1340000	1170000	3	3	1	3	2	Carbamidomethylation	24688
P99028	Cytochrome b-c1 complex subunit 6 mitochondrial	97.21	52	52	42	42	5930000	5040000	3370000	3	3	3	2	3	Carbamidomethylation	10435
Q00262	Syntaxin-2	59.84	16	5	11	5	150000	523000	261000	2	2	1	1	1		33178
Q02819	Nucleobindin-1	120.11	12	3	5	12	312000	787000	2290000	4	4	2	3	4		53409
Q03265	ATP synthase subunit alpha mitochondrial	315.35	49	39	40	47	103000000	124000000	139000000	23	23	21	22	24	Carbamidomethylation; Pyro-glu from E; Deamidation (NQ)	59753
Q03958	Prefoldin subunit 6	105.85	31	31	9	9	2100000	1860000	1690000	3	3	3	1	1	Pyro-glu from Q	14455
Q05186	Reticulocalbin-1	146.54	18	14	10	10	3610000	3400000	3960000	5	5	4	3	4		38113
Q07113	Cation-independent mannose-6-phosphate receptor	101.04	2	0	2	1	264000	1200000	625000	3	3	1	2	1	Carbamidomethylation	273814
Q31125	Zinc transporter SLC39A7	103.47	9	9	9	9	3810000	2700000	3990000	2	2	3	3	3		50657
Q32NY4	Metal transporter CNNM3	80.34	7	3	4	4	48900	106000	91700	2	2	1	1	1		76279
Q3TDQ1	Dolichyl-diphosphooligosaccharide--protein glycosyltransferase subunit STT3B	44.83	4	1	4	0	238000	738000		3	2	1	3	0		93246
Q3TIR3	Synembryn-A	58.88	5	3	3	5	284000	168000	327000	2	2	1	1	2		59847
Q3TIV5	Zinc finger CCCH domain-containing protein 15	90.62	7	2	7	7	457000	1630000	1550000	2	2	1	2	2		48327
Q3TLH4	Protein PRRC2C	75.8	3	1	1	1	273000	560000	122000	4	4	2	2	1		310891
Q3TVI8	Pre-B-cell leukemia transcription factor-interacting protein 1	138.66	15	13	8	10	1760000	559000	923000	6	6	6	4	5	Pyro-glu from Q	81165
Q3TXU5	Deoxyhypusine synthase	112.4	9	9	5	5	602000	740000	636000	2	2	2	2	2		40642
Q3U9G9	Delta(14)-sterol reductase	120.89	7	7	5	3	1430000	1930000	1020000	3	3	3	2	1		71440
Q3UGC7	Eukaryotic translation initiation factor 3 subunit J-A	105.95	26	22	14	9	2800000	3570000	1770000	4	4	3	3	2	Carbamidomethylation	29344
Q3UHX2	28 kDa heat- and acid-stable phosphoprotein	99.21	10	10	10	9	296000	0	160000	2	2	3	1	1		20605
Q3UN02	Lysocardiolipin acyltransferase 1	80.52	11	11	11	11	1840000	1850000	1670000	2	2	2	2	2		44400
Q3UPH1	Protein PRRC1	110.52	10	7	10	10	1290000	1600000	1250000	2	2	1	2	3	Pyro-glu from Q	46298
Q3UV17	Keratin type II cytoskeletal 2 oral	98.05	10	9	5	3	64000000	69400000	70300000	4	2	3	3	2	Carbamidomethylation	62845
Q3UVK0	Endoplasmic reticulum metallopeptidase 1	163.51	15	5	10	8	1800000	2850000	3070000	7	7	2	4	4	Carbamidomethylation; Deamidation (NQ)	100148
Q3UZ39	Leucine-rich repeat flightless-interacting protein 1	120.04	11	11	2	2	1760000	85100	70100	4	4	4	1	1	Carbamidomethylation; Deamidation (NQ)	79249
Q3V009	Transmembrane emp24 domain-containing protein 1	87.42	15	7	15	15	560000	1790000	1830000	2	2	1	2	3		25263
Q3V1T4	Prolyl 3-hydroxylase 1	86.94	4	2	2	4	573000	540000	450000	2	2	1	1	2	Carbamidomethylation	83651
Q4KML4	Costars family protein ABRACL	88.4	46	46	46	46	304000	295000	339000	2	2	2	2	2	Carbamidomethylation	9030
Q4VAA2	Protein CDV3	116.98	32	20	23	6	1130000	532000	242000	5	5	3	3	1		29729
Q501J7	Phosphatase and actin regulator 4	135.29	11	9	4	3	2690000	1080000	837000	5	5	5	3	2	Deamidation (NQ)	76632
Q5F2E8	Serine/threonine-protein kinase TAO1	73.85	3	0	3	1		921000	243000	3	3	0	3	1		116050
Q5FWK3	Rho GTPase-activating protein 1	181.11	32	14	15	21	5580000	6020000	18000000	10	10	4	5	6	Carbamidomethylation	50411
Q60597	2-oxoglutarate dehydrogenase mitochondrial	90.99	7	3	3	1	523000	1900000	964000	5	5	3	2	1		116449
Q60710	Deoxynucleoside triphosphate triphosphohydrolase SAMHD1	52.6	6	0	4	6		514000	47000	2	2	0	1	2		75893
Q60716	Prolyl 4-hydroxylase subunit alpha-2	123.58	16	12	16	9	3650000	5540000	2100000	5	5	4	6	4		61002
Q60737	Casein kinase II subunit alpha	84.48	11	9	6	2	975000	264000	163000	3	3	2	2	1		45134
Q60754	Macrophage receptor MARCO	39.12	8	0	8	4		444000	224000	2	2	0	1	1		52730
Q60865	Caprin-1	180.17	19	14	17	13	18200000	18500000	11900000	8	8	9	9	7	Pyro-glu from Q	78169
Q60931	Voltage-dependent anion-selective channel protein 3	101.73	15	15	8	8	6560000	1150000	1100000	3	2	4	3	3		30753
Q60996	Serine/threonine-protein phosphatase 2A 56 kDa regulatory subunit gamma isoform	77.84	6	3	6	3	302000	1150000	227000	2	2	2	3	1	Carbamidomethylation; Pyro-glu from Q	60825
Q61029	Lamina-associated polypeptide 2 isoforms beta/delta/epsilon/gamma	130.41	19	4	12	10	689000	3640000	1770000	5	5	1	3	3		50373
Q61035	Histidine--tRNA ligase cytoplasmic	129.4	13	10	11	4	4300000	6610000	2210000	5	5	3	4	2	Carbamidomethylation	57432
Q61074	Protein phosphatase 1G	59.24	11	11	4	7	773000	224000	340000	2	2	2	1	1	Carbamidomethylation	58728
Q61239	Protein farnesyltransferase/geranylgeranyltransferase type-1 subunit alpha	104.82	13	13	10	10	1060000	910000	761000	3	3	4	3	3		44013
Q61245	Collagen alpha-1(XI) chain	39.47	2	1	0	1	470000		526000	2	2	1	0	1	Deamidation (NQ)	181031
Q61334	B-cell receptor-associated protein 29	54.17	10	4	10	0	457000	2030000		2	2	1	2	0		27964
Q61425	Hydroxyacyl-coenzyme A dehydrogenase mitochondrial	77.55	13	13	13	4	1550000	1630000	877000	2	2	2	2	1	Carbamidomethylation	34464
Q61545	RNA-binding protein EWS	65.34	4	4	4	4	2190000	2300000	1710000	2	2	2	2	2		68462
Q61576	Peptidyl-prolyl cis-trans isomerase FKBP10	107.82	8	8	6	4	5840000	5330000	2940000	4	4	4	4	3		64698
Q61595	Kinectin	157.75	9	8	4	6	15700000	13600000	13700000	8	8	7	5	5	Carbamidomethylation; Pyro-glu from Q	152592
Q61599	Rho GDP-dissociation inhibitor 2	113.57	36	24	10	23	3900000	2750000	3090000	3	3	3	2	4	Carbamidomethylation	22851
Q61735	Leukocyte surface antigen CD47	108.38	12	12	8	8	12700000	9910000	20100000	3	3	6	5	5	Deamidation (NQ)	33098
Q61792	LIM and SH3 domain protein 1	76.1	10	10	10	10	3100000	3060000	3110000	2	2	2	2	2		29994
Q62048	Astrocytic phosphoprotein PEA-15	69.37	30	8	13	30	0	551000	2560000	3	3	1	1	3		15054
Q62084	Protein phosphatase 1 regulatory subunit 14B	147.13	69	50	37	55	3090000	6270000	5300000	7	7	5	4	6	Carbamidomethylation; Deamidation (NQ)	15957
Q62087	Serum paraoxonase/lactonase 3	98.98	15	0	9	15		616000	2030000	3	3	0	2	3	Deamidation (NQ)	39351
Q62186	Translocon-associated protein subunit delta	116.87	25	19	25	11	1810000	7190000	5320000	3	3	2	4	1		18937
Q62273	Sulfate transporter	45.19	3	0	1	1		180000	79800	2	2	0	1	1		81604
Q62393	Tumor protein D52	71.66	14	8	14	0	466000	802000		2	2	1	2	0		24313
Q62422	Osteoclast-stimulating factor 1	91.73	14	14	14	14	1680000	1560000	1940000	2	2	2	2	3	Deamidation (NQ)	23783
Q62446	Peptidyl-prolyl cis-trans isomerase FKBP3	56.15	12	7	0	5	1130000		1040000	2	2	1	0	1		25148
Q62470	Integrin alpha-3	289.65	36	30	30	30	63800000	71300000	85900000	26	26	23	23	24	Carbamidomethylation; Pyro-glu from Q; Deamidation (NQ)	116745
Q63918	Caveolae-associated protein 2	103.08	7	4	7	7	1200000	1790000	1780000	2	2	1	2	2		46764
Q64010	Adapter molecule crk	88.6	16	10	11	0	944000	1490000		3	3	2	3	0		33815
Q64133	Amine oxidase [flavin-containing] A	129.81	24	13	14	11	5530000	4650000	3630000	8	8	5	6	3	Carbamidomethylation	59602
Q64310	Surfeit locus protein 4	124.05	16	13	16	13	2260000	4210000	1280000	3	3	3	5	3	Oxidation (M); Pyro-glu from Q	30381
Q64324	Syntaxin-binding protein 2	86.54	7	4	4	7	59700	72700	70400	2	2	1	1	2	Carbamidomethylation; Pyro-glu from Q	66358
Q64442	Sorbitol dehydrogenase	49.39	9	5	5	4	710000	443000	425000	2	2	1	1	1		38249
Q64521	Glycerol-3-phosphate dehydrogenase mitochondrial	170.36	19	14	12	7	8160000	8670000	6650000	9	9	6	7	5	Carbamidomethylation	80954
Q66JS6	Eukaryotic translation initiation factor 3 subunit J-B	105.95	26	22	14	9	2800000	3570000	1770000	4	4	3	3	2	Carbamidomethylation	29486
Q66JT1	Volume-regulated anion channel subunit LRRC8E	40.48	4	1	3	0	65500	71200		2	2	1	1	0		90501
Q6DID7	Protein wntless homolog	53.88	7	7	7	0	3140000	2990000		3	3	3	0	0	Carbamidomethylation	62188
Q6DYE8	Ectonucleotide pyrophosphatase/phosphodiesterase family member 3	177.66	25	19	18	19	9920000	11300000	11400000	14	14	10	11	9	Carbamidomethylation	98662
Q6GQT9	Nodal modulator 1	192.37	23	14	14	10	6770000	7180000	7490000	16	16	11	10	9	Carbamidomethylation; Deamidation (NQ)	133420
Q6NZC7	SEC23-interacting protein	62.66	8	4	4	1	879000	1470000	107000	4	4	2	2	1	Deamidation (NQ)	110780
Q6P5E4	UDP-glucose:glycoprotein glucosyltransferase 1	215.29	21	13	11	16	7200000	5790000	9620000	23	23	15	11	17	Carbamidomethylation; Pyro-glu from Q	176433
Q6P5F6	Zinc transporter ZIP10	103.64	4	4	1	1	1320000	930000	746000	2	2	2	1	1	Carbamidomethylation	94394
Q6P6L0	Filamin A-interacting protein 1-like	50.5	2	1	0	2	113000		305000	2	2	1	0	2		129772
Q6PA06	Atlastin-2	56.71	6	3	0	6	653000		980000	2	2	1	0	2		66224
Q6PAM1	Alpha-taxilin	85.58	6	3	0	6	1760000		2260000	2	2	1	0	2		62369
Q6PB66	Leucine-rich PPR motif-containing protein mitochondrial	85.97	4	1	3	3	448000	833000	1250000	6	5	1	3	4		156614
Q6PD26	GPI transamidase component PIG-S	125.68	9	9	7	7	6010000	1360000	1010000	3	3	4	3	2		61711
Q6PGF7	Exocyst complex component 8	78.36	4	2	4	2	92500	535000	104000	2	2	1	2	1	Pyro-glu from Q	81035
Q6PIP5	NudC domain-containing protein 1	79.17	4	3	4	0	693000	1670000		2	2	1	3	0		66705
Q6R0H7	Guanine nucleotide-binding protein G(s) subunit alpha isoforms XLas	249.1	15	13	11	15	30400000	24800000	31500000	13	11	15	16	18	Carbamidomethylation; Pyro-glu from Q; Deamidation (NQ)	121505
Q6URW6	Myosin-14	172.51	4	3	3	3	469000	0		7	2	9	8	9	Carbamidomethylation; Oxidation (M); Pyro-glu from Q; Deamidation (NQ)	228584
Q6ZQI3	Malectin	166.08	25	25	20	14	7570000	5490000	4320000	7	7	8	6	5	Carbamidomethylation	32342
Q6ZWM4	U6 snRNA-associated Sm-like protein LSm8	113.64	52	52	10	27	3060000	1200000	3100000	3	3	3	1	2		10403
Q6ZWQ7	Signal peptidase complex subunit 3	93.1	28	13	12	17	2890000	4310000	2690000	4	4	2	2	2	Deamidation (NQ)	20313
Q7TMF3	NADH dehydrogenase [ubiquinone] 1 alpha subcomplex subunit 12	79.57	20	20	20	8	216000	610000	216000	2	2	2	2	1		17086
Q7TN37	Transient receptor potential cation channel subfamily M member 4	40.32	2	0	2	2		929000	922000	2	2	0	2	0		135760
Q7TNP2	Serine/threonine-protein phosphatase 2A 65 kDa regulatory subunit A beta isoform	195.45	18	16	10	16	387000	102000	317000	8	2	10	9	11	Carbamidomethylation; Pyro-glu from Q	65934
Q7TQ95	Endoplasmic reticulum junction formation protein lunapark	36.8	5	0	2	3		668000	998000	2	2	0	1	1		47500
Q7TSC1	Protein PRRC2A	65.54	3	1	1	1	326000	2270000	0	2	2	1	1	1	Deamidation (NQ)	229200
Q7TSV4	Phosphoglucomutase-2	51.88	7	0	3	4		603000	205000	2	2	0	1	1		68748
Q80TV8	CLIP-associating protein 1	94.07	5	2	4	0	984000	1090000		5	5	2	4	0		169227
Q80UM7	Mannosyl-oligosaccharide glucosidase	54.37	4	0	1	3		589000	20100	2	2	0	1	1		91831
Q80UU9	Membrane-associated progesterone receptor component 2	184.52	35	31	35	35	5040000	6300000	7700000	5	4	4	5	5	Carbamidomethylation	23334
Q80VJ3	2'-deoxynucleoside 5'-phosphate N-hydrolase 1	53.37	18	8	0	10	216000		138000	2	2	1	0	1		18977
Q80W54	CAAX prenyl protease 1 homolog	115.93	21	5	10	13	5160000	7440000	1810000	6	6	2	4	3		54735
Q80WJ7	Protein LYRIC	152.07	12	10	12	12	8400000	7490000	8250000	7	7	6	7	7		63846
Q80WW9	DDRGK domain-containing protein 1	93.34	21	10	21	11	1380000	1220000	1410000	3	3	3	4	1		35977
Q80X50	Ubiquitin-associated protein 2-like	69.25	3	1	3	3	137000	306000	82300	2	2	2	3	2		116799
Q80Y14	Glutaredoxin-related protein 5 mitochondrial	75.58	41	0	9	32		474000	231000	3	3	0	1	2	Carbamidomethylation	16292
Q80YR5	Scaffold attachment factor B2	91.88	6	1	5	3	38100	870000	362000	3	3	1	2	1		111839
Q80Z10	Astrotactin-2	35.17	3	2	3	0	158000	283000		2	2	1	1	0		149390
Q80ZI1	TMF-regulated nuclear protein 1	36.26	16	11	0	16	850000		1330000	2	2	1	0	2	Pyro-glu from Q; Deamidation (NQ)	23086
Q8BFQ8	Glutamine amidotransferase-like class 1 domain-containing protein 1	69.23	14	5	14	5	441000	540000	478000	2	2	1	2	1		23277
Q8BFR4	N-acetylglucosamine-6-sulfatase	107.03	13	6	8	11	1880000	2900000	2670000	5	4	3	4	4		61175
Q8BH59	Calcium-binding mitochondrial carrier protein Aralar1	158.32	14	14	7	10	1450000	613000	872000	5	5	6	3	3		74570
Q8BH79	Anoctamin-10	42.96	5	3	2	0	193000	371000		2	2	1	1	0		76188
Q8BHG1	Nardilysin	153.1	14	10	10	5	3380000	3290000	1240000	10	10	8	8	4	Carbamidomethylation; Pyro-glu from Q	132891
Q8BHN3	Neutral alpha-glucosidase AB	231.62	31	18	24	18	11900000	17000000	12500000	23	23	13	18	17	Deamidation (NQ)	106911
Q8BI84	Transport and Golgi organization protein 1 homolog	63.29	2	1	0	1	32800		45600	2	2	1	0	1		213673
Q8BJU0	Small glutamine-rich tetratricopeptide repeat-containing protein alpha	57.6	11	0	4	7		833000	4410000	3	3	0	1	2		34322
Q8BKE6	Cytochrome P450 20A1	119.78	17	3	14	15	1420000	4960000	4020000	5	5	1	5	4	Pyro-glu from Q	52149
Q8BKX1	Brain-specific angiogenesis inhibitor 1-associated protein 2	134.23	14	12	7	5	3060000	2310000	362000	6	6	5	3	2		59237
Q8BL66	Early endosome antigen 1	110.13	2	1	2	1	270000	335000	0	2	2	1	2	1	Pyro-glu from Q	160914
Q8BLF1	Neutral cholesterol ester hydrolase 1	134.83	20	10	10	20	597000	2060000	3100000	4	4	2	2	4		45740
Q8BLN5	Lanosterol synthase	69.5	5	2	3	3	659000	1010000	695000	3	3	1	2	2	Carbamidomethylation	83141
Q8BMD8	Calcium-binding mitochondrial carrier protein SCaMC-1	130.18	11	11	6	6	1800000	1700000	2870000	3	3	3	2	2	Pyro-glu from Q	52902
Q8BMF4	Dihydrolipoyllysine-residue acetyltransferase component of pyruvate dehydrogenase complex mitochondrial	106.36	5	5	5	5	1420000	1540000	1600000	2	2	2	2	2	Carbamidomethylation	67942
Q8BMJ3	Eukaryotic translation initiation factor 1A X-chromosomal	70.85	18	10	18	10	453000	548000	373000	2	2	1	2	1		16460
Q8BMK4	Cytoskeleton-associated protein 4	278.87	48	42	43	35	54900000	55800000	46100000	20	20	21	20	19	Pyro-glu from Q	63692
Q8BNY6	Neuronal calcium sensor 1	142.14	43	37	43	37	5090000	4090000	3450000	6	6	5	6	4	Carbamidomethylation	21879
Q8BP92	Reticulocalbin-2	148.05	27	16	18	17	2860000	1270000	3820000	5	5	4	4	4		37271
Q8BPB0	MOB kinase activator 1B	79.22	11	5	6	0	1430000	623000		2	2	1	1	0		25091
Q8BPM0	Disheveled-associated activator of morphogenesis 1	68.18	3	3	1	1	179000	160000	151000	2	2	2	1	1	Carbamidomethylation	123370
Q8BQ47	Protein canopy homolog 4	59.66	17	9	17	17	304000	345000	470000	2	2	1	2	2		28094
Q8BRF7	Sec1 family domain-containing protein 1	68.13	6	6	5	0	950000	780000		2	2	2	0	0		72323
Q8BRN9	Coiled-coil and C2 domain-containing protein 1B	59.43	5	3	2	3	727000	114000	706000	2	2	1	1	1	Pyro-glu from Q	93091
Q8BSY0	Aspartyl/asparaginyl beta-hydroxylase	68.42	7	4	0	4	1160000		1270000	3	3	2	0	2		83042
Q8BTJ4	Bis(5'-adenosyl)-triphosphatase enpp4	71.29	5	2	5	3	347000	656000	400000	2	2	1	2	1		51611
Q8BU33	Acetolactate synthase-like protein	141.14	10	7	7	10	980000	673000	999000	3	3	3	2	3	Carbamidomethylation	68156
Q8BWT1	3-ketoacyl-CoA thiolase mitochondrial	146	16	13	16	11	3760000	3420000	3690000	4	4	4	4	3	Carbamidomethylation	41830
Q8BWZ3	N-alpha-acetyltransferase 25 NatB auxiliary subunit	71.39	5	5	3	1	513000	179000	215000	2	2	2	1	1	Carbamidomethylation	111708
Q8BXN9	Transmembrane protein 87A	71.18	6	6	6	4	1210000	1490000	321000	2	2	2	2	1		63380
Q8BYI8	Protein FAM234B	94.7	12	2	12	0	666000	464000		3	3	1	3	0		67031
Q8C052	Microtubule-associated protein 1S	67.99	7	3	0	6	330000		619000	4	4	2	0	3		102939
Q8C0I1	Alkyldihydroxyacetonephosphate synthase peroxisomal	88.53	5	4	4	5	0	203000	755000	2	2	1	1	2		71684
Q8C145	Zinc transporter ZIP6	62.89	3	0	1	3		646000	1170000	2	2	0	1	2		86380
Q8C3X8	Lipase maturation factor 2	64.98	6	4	4	6	97200	112000	298000	2	2	1	1	2		79997
Q8C7E7	Starch-binding domain-containing protein 1	56.61	12	12	9	0	976000	98900		2	2	2	1	0		36127
Q8C7K6	Prenylcysteine oxidase-like	83.8	8	3	2	6	120000	476000	1150000	3	3	1	1	2		54875
Q8C7X2	ER membrane protein complex subunit 1	167.31	17	11	12	10	3710000	5100000	3700000	10	10	7	7	7	Pyro-glu from Q	111605
Q8C8U0	Liprin-beta-1	46.05	3	0	1	1		284000	603000	2	2	0	1	1		108540
Q8CFE4	SCY1-like protein 2	108.17	8	7	5	5	440000	395000	250000	4	4	3	3	3	Carbamidomethylation; Pyro-glu from Q	103317
Q8CGK3	Lon protease homolog mitochondrial	108.82	9	5	5	1	651000	1100000	398000	4	4	2	3	1		105843
Q8CHH9	Septin-8	166.44	26	20	11	17	2510000	209000	1170000	7	4	6	4	6	Carbamidomethylation; Pyro-glu from Q	49812
Q8CHK3	Lysophospholipid acyltransferase 7	84.44	10	10	5	5	652000	696000	78200	2	2	2	1	1		53436
Q8CHP5	Partner of Y14 and mago	60.13	13	0	12	13		564000	596000	2	2	0	0	2		22690
Q8CHP8	Glycerol-3-phosphate phosphatase	98.35	9	9	9	0	2230000	2450000		2	2	2	0	0	Carbamidomethylation	34541
Q8CI94	Glycogen phosphorylase brain form	89.86	7	5	0	6	2810000		1530000	4	4	3	0	3	Deamidation (NQ)	96730
Q8CJ53	Cdc42-interacting protein 4	99.49	12	12	9	0	1840000	1050000		4	4	4	0	0		68489
Q8JZN5	Acyl-CoA dehydrogenase family member 9 mitochondrial	69.45	8	8	8	0	132000	111000		2	2	2	0	0	Carbamidomethylation	68722
Q8JZS0	Protein lin-7 homolog A	81.96	11	11	11	11	3830000	1950000	5280000	2	2	3	2	2		25993
Q8K0C4	Lanosterol 14-alpha demethylase	121.13	30	18	9	8	5120000	283000	3020000	9	9	6	2	3	Carbamidomethylation	56776
Q8K183	Pyridoxal kinase	95.13	12	12	7	7	978000	725000	527000	2	2	2	2	1		35015
Q8K2B3	Succinate dehydrogenase [ubiquinone] flavoprotein subunit mitochondrial	190.82	23	14	16	21	7560000	7200000	12500000	9	9	6	7	10	Carbamidomethylation	72585
Q8K2K6	Arf-GAP domain and FG repeat-containing protein 1	39.43	5	5	2	0	153000	83800		2	2	2	1	0	Pyro-glu from Q	58043
Q8K2P7	Sodium-coupled neutral amino acid transporter 1	92.31	7	6	7	6	1960000	3030000	2440000	3	3	2	3	2	Carbamidomethylation	53795
Q8K354	Carbonyl reductase [NADPH] 3	115.47	24	24	11	18	2450000	970000	1210000	4	4	4	2	3		30953
Q8K3C3	Protein LZIC	111.38	17	12	12	17	707000	663000	772000	2	2	2	1	2		21537
Q8K4Z3	NAD(P)H-hydrate epimerase	99.55	16	12	6	11	1900000	968000	855000	3	3	2	1	2	Carbamidomethylation	30973
Q8K5B2	Multiple coagulation factor deficiency protein 2 homolog	81.15	28	28	17	12	838000	117000	902000	2	2	3	1	1		16168
Q8QZT1	Acetyl-CoA acetyltransferase mitochondrial	147.75	31	16	17	17	2700000	1290000	3460000	7	7	4	3	4	Pyro-glu from E; Deamidation (NQ)	44816
Q8R016	Bleomycin hydrolase	106.77	20	15	8	20	2910000	1150000	3160000	5	5	4	2	5	Carbamidomethylation	52511
Q8R0X7	Sphingosine-1-phosphate lyase 1	126.23	11	5	10	6	4410000	8090000	3070000	5	5	2	5	3		63677
Q8R180	ERO1-like protein alpha	112.66	9	3	3	9	339000	344000	681000	2	2	1	1	2	Carbamidomethylation; Pyro-glu from Q	54085
Q8R1I1	Cytochrome b-c1 complex subunit 9	58.69	38	27	38	38	1970000	3710000	2890000	2	2	1	2	2		7446
Q8R1X6	Spartin	58.98	4	4	2	2	147000	93700	109000	2	2	2	1	1		72655
Q8R2Y8	Peptidyl-tRNA hydrolase 2 mitochondrial	153.82	35	35	27	16	1830000	1360000	2280000	4	4	4	3	2	Carbamidomethylation	19527
Q8R317	Ubiquilin-1	144.86	11	8	9	9	193000	140000	1710000	4	2	4	4	5		61976
Q8R550	SH3 domain-containing kinase-binding protein 1	104.93	5	3	5	2	1060000	1290000	506000	3	3	2	3	1		78170
Q8VBT0	Thioredoxin-related transmembrane protein 1	98.26	18	14	9	18	473000	471000	211000	4	4	2	3	3	Deamidation (NQ)	31396
Q8VBW6	NEDD8-activating enzyme E1 regulatory subunit	76.85	11	0	9	11		838000	1430000	3	3	0	2	3		60274
Q8VBZ3	Cleft lip and palate transmembrane protein 1 homolog	163.94	20	10	13	14	1670000	1710000	1090000	6	6	5	5	6	Carbamidomethylation; Deamidation (NQ)	75291
Q8VC57	BTB/POZ domain-containing protein KCTD5	89.58	16	7	9	0	1070000	2280000		2	2	1	1	0		26164
Q8VCH8	UBX domain-containing protein 4	113.14	8	8	8	8	1570000	1890000	1960000	2	2	2	2	2		56472
Q8VCK3	Tubulin gamma-2 chain	77.1	12	2	7	4	332000	5290000	1280000	3	3	1	1	2	Carbamidomethylation	51122
Q8VDL4	ADP-dependent glucokinase	132.32	19	9	13	9	1850000	2440000	1590000	6	6	3	4	4	Carbamidomethylation	53903
Q8VE70	Programmed cell death protein 10	38.9	11	11	11	0	1170000	1480000		2	2	0	2	0		24716
Q8VE88	Protein FAM114A2	78.42	8	8	5	3	1270000	106000	942000	3	3	3	1	1		54045
Q8VEM8	Phosphate carrier protein mitochondrial	186.29	36	19	32	34	32200000	51800000	51200000	11	11	10	12	13	Carbamidomethylation; Deamidation (NQ)	39632
Q8VHE0	Translocation protein SEC63 homolog	152.11	16	11	13	9	6220000	6940000	4640000	7	7	6	6	4	Carbamidomethylation	87870
Q8VI75	Importin-4	92.39	4	2	2	2	158000	76700	801000	3	3	2	1	2		119275
Q8WTY4	Anamorsin	78.78	18	18	18	5	1720000	1870000	911000	3	3	4	4	1		33429
Q91V61	Sideroflexin-3	128.42	19	15	14	5	865000	634000	272000	3	3	2	2	1		35406
Q91VD9	NADH-ubiquinone oxidoreductase 75 kDa subunit mitochondrial	127.29	15	3	10	9	564000	957000	2320000	6	6	1	4	4		79777
Q91VI7	Ribonuclease inhibitor	278.24	65	37	45	52	26800000	29700000	35100000	18	18	13	16	18	Carbamidomethylation; Pyro-glu from Q; Deamidation (NQ)	49817
Q91VJ2	Caveolae-associated protein 3	59.97	17	0	6	17		523000	2540000	2	2	0	1	2		27853
Q91VM5	RNA binding motif protein X-linked-like-1	75.81	10	3	10	7	1820000	3730000	3030000	3	3	1	3	3		42162
Q91VR2	ATP synthase subunit gamma mitochondrial	142.36	35	31	27	31	11200000	6320000	8290000	7	7	6	5	6	Carbamidomethylation	32886
Q91VR8	Protein BRICK1	38.4	25	25	0	11	5050000		3340000	2	2	2	0	1		8761
Q91WQ3	Tyrosine--tRNA ligase cytoplasmic	147.92	13	8	8	11	967000	3000000	2960000	5	5	2	3	7	Pyro-glu from Q; Deamidation (NQ)	59105
Q91YH5	Atlastin-3	180.96	30	11	21	26	3360000	4950000	7340000	10	10	3	6	10	Carbamidomethylation; Pyro-glu from Q	60575
Q91YI0	Argininosuccinate lyase	115.37	16	0	12	16		1190000	925000	3	3	0	2	3	Pyro-glu from Q	51739
Q91YP2	Neurolysin mitochondrial	63.39	8	0	4	4		452000	314000	4	3	0	2	2		80429
Q91YT0	NADH dehydrogenase [ubiquinone] flavoprotein 1 mitochondrial	99.21	15	15	13	13	2280000	2220000	1650000	3	3	4	2	3	Carbamidomethylation; Deamidation (NQ)	50834
Q91ZU6	Dystonin	84.89	1	0	0	1	123000	78900	66600	3	3	2	1	3	Pyro-glu from Q	834234
Q921E2	Ras-related protein Rab-31	99.53	14	14	14	7	1350000	1270000	1080000	2	2	3	3	2		21331
Q921I2	Kelch domain-containing protein 4	103.24	5	3	5	3	414000	383000	340000	2	2	1	2	1	Carbamidomethylation	64861
Q921L3	Calcium load-activated calcium channel	102.54	12	12	12	12	4630000	4330000	4180000	2	2	2	2	2		21175
Q921X9	Protein disulfide-isomerase A5	63.27	5	3	0	2	338000		258000	2	2	1	0	1	Carbamidomethylation	59267
Q921Y0	MOB kinase activator 1A	79.22	11	5	6	0	1430000	623000		2	2	1	1	0		25080
Q922J9	Fatty acyl-CoA reductase 1	85.42	9	4	9	5	1560000	3810000	2310000	4	4	2	4	2		59435
Q924Z4	Ceramide synthase 2	105.92	11	7	11	7	7020000	6060000	5860000	3	3	6	4	2	Pyro-glu from Q; Deamidation (NQ)	45024
Q925Q3	Mitochondrial sodium/calcium exchanger protein	53.74	6	0	3	4		71200	117000	2	2	0	1	1		64365
Q99J09	Methylosome protein 50	135.97	30	19	12	9	2810000	30400000	1520000	6	6	4	2	2	Carbamidomethylation	36943
Q99J27	Acetyl-coenzyme A transporter 1	78.43	7	7	7	4	431000	317000	64500	2	2	2	2	1		61075
Q99J47	Dehydrogenase/reductase SDR family member 7B	68.44	12	3	12	7	328000	1160000	1280000	3	3	1	3	2		34987
Q99J56	Derlin-1	67.87	9	0	9	6		2470000	1310000	2	2	0	2	1		28835
Q99JB2	Stomatin-like protein 2 mitochondrial	68.68	9	4	4	9	562000	757000	965000	2	2	1	1	2		38385
Q99JF8	PC4 and SFRS1-interacting protein	78.87	4	4	0	4	186000		20900	2	2	1	0	1		59697
Q99JH8	ER lumen protein-retaining receptor 1	88.85	25	14	16	19	274000	536000	591000	4	3	2	4	3		24560
Q99JR1	Sideroflexin-1	57.75	12	4	7	0	183000	21600		2	2	1	1	0		35649
Q99JY8	Phospholipid phosphatase 3	42.13	10	10	8	0	946000	825000		2	2	2	0	0	Carbamidomethylation; Pyro-glu from Q	35216
Q99KC8	von Willebrand factor A domain-containing protein 5A	52.06	5	2	2	3	707000	483000	677000	3	3	1	1	2	Carbamidomethylation	87143
Q99KE1	NAD-dependent malic enzyme mitochondrial	141.71	16	8	13	16	1140000	1110000	706000	4	4	2	4	4	Carbamidomethylation	65799
Q99KF1	Transmembrane emp24 domain-containing protein 9	77.41	20	16	12	11	8300000	1970000	2630000	4	3	4	2	2	Carbamidomethylation; Pyro-glu from Q	27127
Q99KH8	Serine/threonine-protein kinase 24	130.47	18	7	7	18	365000	110000	1340000	4	4	3	2	5	Carbamidomethylation	47954
Q99KI3	ER membrane protein complex subunit 3	109.4	15	10	8	10	1700000	1410000	1690000	3	3	2	2	2		29980
Q99KK7	Dipeptidyl peptidase 3	205.75	21	20	9	13	4710000	2380000	4540000	9	9	8	4	6	Carbamidomethylation	82898
Q99KQ4	Nicotinamide phosphoribosyltransferase	46.25	7	0	4	2		250000	104000	2	2	0	1	1		55447
Q99KU0	Vacuole membrane protein 1	50.6	11	0	7	4		1060000	564000	2	2	0	1	1		45960
Q99KV1	DnaJ homolog subfamily B member 11	55.5	8	3	3	8	938000	1480000	1060000	2	2	1	1	2	Carbamidomethylation	40555
Q99L04	Dehydrogenase/reductase SDR family member 1	96.17	21	7	9	9	18700	608000	514000	4	4	1	2	2	Carbamidomethylation	34005
Q99L43	Phosphatidate cytidylyltransferase 2	100.98	8	8	8	8	657000	2030000	1840000	2	2	2	2	2		51314
Q99LC3	NADH dehydrogenase [ubiquinone] 1 alpha subcomplex subunit 10 mitochondrial	84.23	9	0	3	6		233000	439000	2	2	0	1	1		40603
Q99LC5	Electron transfer flavoprotein subunit alpha mitochondrial	146.13	30	26	18	14	1350000	1230000	1600000	5	5	5	4	4	Pyro-glu from Q; Deamidation (NQ)	35009
Q99LD4	COP9 signalosome complex subunit 1	69.87	9	6	6	9	1310000	928000	1690000	2	2	1	1	2	Deamidation (NQ)	53442
Q99LP6	GrpE protein homolog 1 mitochondrial	56.49	10	10	5	10	1700000	1390000	3030000	2	2	2	1	2		24307
Q99LR1	Monoacylglycerol lipase ABHD12	85.08	13	13	8	9	2340000	1990000	1730000	4	4	4	3	3		45270
Q99LX0	Protein/nucleic acid deglycase DJ-1	142.43	26	26	17	19	3990000	1310000	5160000	4	4	4	3	4	Carbamidomethylation	20021
Q99M71	Mammalian ependymin-related protein 1	102.33	16	6	10	16	493000	1090000	1370000	3	3	1	2	3	Carbamidomethylation; Pyro-glu from Q	25485
Q99MQ5	Collagen alpha-1(XXV) chain	34.5	4	0	2	2		703000	590000	2	2	0	1	1	Oxidation (M); Deamidation (NQ)	65377
Q99MS7	EH domain-binding protein 1-like protein 1	66.94	2	1	2	1	161000	177000	227000	2	2	1	2	2		184833
Q99N96	39S ribosomal protein L1 mitochondrial	38.78	9	4	5	0	356000	429000		2	2	1	1	0	Deamidation (NQ)	37597
Q99P58	Ras-related protein Rab-27B	104.92	18	18	18	11	1070000	664000	744000	3	2	3	3	2	Deamidation (NQ)	24560
Q99P88	Nuclear pore complex protein Nup155	74.65	3	2	3	2	49300	51200	56600	2	2	1	2	1		155117
Q9CPV4	Glyoxalase domain-containing protein 4	132.63	23	15	11	15	2410000	2440000	5420000	5	5	4	2	3		33317
Q9CQ89	Protein CutA	78.49	18	18	18	8	2500000	2510000	1870000	2	2	2	2	1	Carbamidomethylation	18865
Q9CQ92	Mitochondrial fission 1 protein	58.75	24	16	7	24	2550000	1290000	2890000	3	3	2	1	3		17009
Q9CQB5	CDGSH iron-sulfur domain-containing protein 2	89.72	21	0	10	21		455000	1880000	2	2	0	1	3	Pyro-glu from Q	15242
Q9CQC9	GTP-binding protein SAR1b	85.91	21	11	10	11	1190000	96800	1060000	3	2	2	1	2	Carbamidomethylation; Deamidation (NQ)	22382
Q9CQF3	Cleavage and polyadenylation specificity factor subunit 5	130.39	27	21	27	19	3010000	3870000	1500000	3	3	2	3	3		26240
Q9CQF9	Prenylcysteine oxidase	138.18	11	11	7	0	2390000	1600000		3	3	4	2	0	Deamidation (NQ)	56495
Q9CQK7	RWD domain-containing protein 1	102.36	17	17	0	11	1540000		954000	2	2	2	0	1		27785
Q9CQM5	Thioredoxin domain-containing protein 17	89.63	27	27	27	19	6390000	5740000	5240000	3	3	3	3	2	Carbamidomethylation	14015
Q9CQN1	Heat shock protein 75 kDa mitochondrial	179.31	24	13	18	17	2050000	2780000	3690000	9	8	5	6	6		80209
Q9CQQ7	ATP synthase F(0) complex subunit B1 mitochondrial	78.39	23	10	10	23	607000	676000	1530000	4	4	2	2	4		28949
Q9CQU0	Thioredoxin domain-containing protein 12	93.58	14	14	14	14	4440000	5050000	5570000	2	2	3	3	3		19049
Q9CQW1	Synaptobrevin homolog YKT6	116.96	24	17	24	5	4090000	4890000	1230000	4	4	3	4	1		22314
Q9CQX2	Cytochrome b5 type B	145.59	42	42	42	32	22400000	23200000	22300000	3	3	3	3	3	Pyro-glu from Q	16318
Q9CQX5	Claudin domain-containing protein 1	73.7	15	6	9	11	2040000	3120000	3320000	3	3	1	2	2		28572
Q9CQY5	Magnesium transporter protein 1	59.91	7	0	7	4		665000	258000	2	2	0	2	1	Pyro-glu from Q	37970
Q9CR20	Immediate early response 3-interacting protein 1	117.56	55	55	55	24	3780000	3450000	3460000	2	2	2	2	1	Carbamidomethylation	9017
Q9CR62	Mitochondrial 2-oxoglutarate/malate carrier protein	131.94	23	13	15	20	3570000	2080000	4290000	5	5	3	3	4		34155
Q9CR64	Protein kish-A	58.62	25	25	25	25	1830000	2610000	2700000	2	2	2	2	2		8074
Q9CR67	Transmembrane protein 33	73.69	9	9	5	5	3220000	3040000	2600000	2	2	2	1	1		28031
Q9CRA5	Golgi phosphoprotein 3	119.47	23	4	13	18	84100	904000	190000	4	4	1	2	3		33752
Q9CRB2	H/ACA ribonucleoprotein complex subunit 2	110.48	22	22	22	22	770000	729000	509000	2	2	2	2	2	Carbamidomethylation	17247
Q9CRD2	ER membrane protein complex subunit 2	102.65	16	11	12	7	2730000	2250000	2420000	4	4	4	3	2	Carbamidomethylation	34935
Q9CT10	Ran-binding protein 3	99.09	6	3	6	3	1490000	1980000	1430000	2	2	2	2	1		52573
Q9CWF2	Tubulin beta-2B chain	312.75	72	65	64	64	18500000	18800000	20200000	23	4	24	24	29	Carbamidomethylation; Oxidation (M); Deamidation (NQ)	49953
Q9CWS0	N(G) N(G)-dimethylarginine dimethylaminohydrolase 1	89.9	15	3	12	6		1420000	618000	4	3	1	3	2		31381
Q9CX34	Protein SGT1 homolog	191.3	29	25	19	15	4140000	2580000	2820000	6	6	5	4	3	Carbamidomethylation; Deamidation (NQ)	38159
Q9CXE7	Transmembrane emp24 domain-containing protein 5	89.15	13	7	13	13	2210000	4430000	5410000	2	2	1	2	2		26172
Q9CXI5	Mesencephalic astrocyte-derived neurotrophic factor	131.46	27	9	18	19	4550000	8480000	10500000	4	4	3	4	4	Carbamidomethylation	20374
Q9CY50	Translocon-associated protein subunit alpha	122.01	18	18	12	12	19600000	19200000	25800000	4	4	5	4	4	Pyro-glu from Q	32065
Q9CYA0	Cysteine-rich with EGF-like domain protein 2	58.57	8	4	0	5	968000		97300	2	2	2	0	1	Carbamidomethylation	38220
Q9CYN2	Signal peptidase complex subunit 2	66.38	16	8	8	0	1010000	216000		2	2	1	1	0		24978
Q9CYZ2	Tumor protein D54	113.54	29	10	22	25	2900000	3780000	1140000	5	5	2	3	3		24043
Q9CZ13	Cytochrome b-c1 complex subunit 1 mitochondrial	223.7	33	26	26	31	18600000	13700000	12300000	10	10	10	9	10	Carbamidomethylation	52852
Q9CZH7	Matrix-remodeling-associated protein 7	167.51	36	36	26	36	9510000	1440000	7480000	4	4	5	2	4	Carbamidomethylation	19458
Q9D024	Coiled-coil domain-containing protein 47	153.28	16	9	16	16	3650000	5360000	7170000	5	5	3	6	6	Carbamidomethylation; Pyro-glu from Q	55844
Q9D0B6	Protein PBDC1	143.1	43	20	27	26	2740000	3400000	1580000	6	6	2	4	3	Carbamidomethylation	22223
Q9D0F3	Protein ERGIC-53	173.65	24	22	12	12	3730000	6210000	3300000	6	6	5	3	2	Carbamidomethylation	57789
Q9D0K2	Succinyl-CoA:3-ketoacid coenzyme A transferase 1 mitochondrial	189.18	36	24	27	26	1530000	4080000	2850000	8	8	5	11	9	Carbamidomethylation; Pyro-glu from Q; Deamidation (NQ)	55989
Q9D0M3	Cytochrome c1 heme protein mitochondrial	95.01	18	4	9	10	1430000	3060000	392000	4	3	1	3	2	Carbamidomethylation	35328
Q9D154	Leukocyte elastase inhibitor A	123.99	27	21	10	6	5250000	3340000	3100000	7	6	5	3	2		42575
Q9D1G5	Leucine-rich repeat-containing protein 57	97	27	21	27	5	1940000	2860000	818000	4	4	3	4	1		26760
Q9D1K2	V-type proton ATPase subunit F	93.98	30	20	30	30	243000	975000	834000	2	2	2	2	2		13370
Q9D1L9	Ragulator complex protein LAMTOR5	128.07	44	44	22	44	4430000	3600000	3890000	2	2	2	1	2	Carbamidomethylation	9642
Q9D1M7	Peptidyl-prolyl cis-trans isomerase FKBP11	102.04	31	19	19	16	3180000	3220000	1670000	4	4	3	3	2	Carbamidomethylation; Pyro-glu from Q	22137
Q9D1Q6	Endoplasmic reticulum resident protein 44	166.1	18	9	16	12	2920000	5450000	4060000	5	4	3	4	3	Carbamidomethylation; Pyro-glu from Q	46853
Q9D1X0	Nucleolar protein 3	134.75	29	20	12	29	274000	257000	680000	3	3	2	1	3	Carbamidomethylation	24568
Q9D2M8	Ubiquitin-conjugating enzyme E2 variant 2	74.01	20	20	7	7	12200000	615000	291000	3	3	3	1	1		16367
Q9D3D9	ATP synthase subunit delta mitochondrial	137.39	29	29	8	29	8450000	6290000	9110000	3	3	2	1	3		17600
Q9D4J1	EF-hand domain-containing protein D1	63.03	17	17	0	0	344000			2	2	2	0	0	Carbamidomethylation	27000
Q9D662	Protein transport protein Sec23B	200.92	19	15	14	18	2750000	2830000	3950000	10	7	9	7	9	Carbamidomethylation	86437
Q9D6R2	Isocitrate dehydrogenase [NAD] subunit alpha mitochondrial	74.74	13	10	10	9	2510000	2460000	2130000	3	3	2	2	2		39639
Q9D706	RNA polymerase II-associated protein 3	49.98	5	5	0	0	194000			2	2	2	0	0	Pyro-glu from E; Deamidation (NQ)	74096
Q9D710	Thioredoxin-related transmembrane protein 2	80.28	9	9	9	9	574000	1050000	332000	2	2	2	4	4	Pyro-glu from Q	33943
Q9D771	Transmembrane protein 206	66.41	14	7	0	7	153000		2700000	2	2	1	0	1	Carbamidomethylation	40178
Q9D855	Cytochrome b-c1 complex subunit 7	88.18	22	22	10	10	2210000	1410000	1760000	2	2	2	1	2		13527
Q9D883	Splicing factor U2AF 35 kDa subunit	59.05	13	8	13	8	4750000	4270000	4820000	2	2	2	3	1	Deamidation (NQ)	27815
Q9D892	Inosine triphosphate pyrophosphatase	144.18	31	31	19	31	4420000	4370000	3680000	3	3	3	2	5	Carbamidomethylation	21897
Q9D8V0	Minor histocompatibility antigen H13	128.52	19	9	9	19	10100000	8190000	9470000	4	4	2	2	4	Carbamidomethylation	41748
Q9D8Y0	EF-hand domain-containing protein D2	43.59	11	5	0	6	187000		218000	2	2	1	0	1		26791
Q9D964	Glycine amidinotransferase mitochondrial	168.89	21	14	9	17	4530000	4160000	5570000	6	6	4	3	6	Carbamidomethylation; Deamidation (NQ)	48297
Q9D9K3	Cell death regulator Aven	47.91	9	6	3	0	191000	131000		2	2	1	1	0		37196
Q9DAR7	m7GpppX diphosphatase	139.77	26	13	20	7	2810000	2530000	1220000	6	6	3	5	2	Deamidation (NQ)	38988
Q9DAS9	Guanine nucleotide-binding protein G(I)/G(S)/G(O) subunit gamma-12	91.2	42	22	22	42	2090000	2520000	3580000	2	2	1	1	2	Carbamidomethylation	7997
Q9DB15	39S ribosomal protein L12 mitochondrial	108.95	31	24	31	12	3170000	3760000	472000	5	5	3	4	1		21708
Q9DB20	ATP synthase subunit O mitochondrial	149.02	32	25	27	27	7440000	9430000	10200000	5	5	4	4	4	Carbamidomethylation	23364
Q9DB77	Cytochrome b-c1 complex subunit 2 mitochondrial	206.64	32	13	29	19	9840000	18100000	16400000	9	9	7	12	12	Deamidation (NQ)	48235
Q9DBR7	Protein phosphatase 1 regulatory subunit 12A	60.96	3	1	0	2	152000		0	2	2	1	0	1		114996
Q9DBS1	Transmembrane protein 43	181.43	32	28	27	25	22600000	29100000	26600000	8	8	6	8	7		44783
Q9DBZ5	Eukaryotic translation initiation factor 3 subunit K	113.84	27	11	27	6	8490000	15700000	3770000	4	4	2	4	1	Carbamidomethylation	25087
Q9DC16	Endoplasmic reticulum-Golgi intermediate compartment protein 1	89.84	16	11	11	16	5590000	5230000	9440000	3	3	2	2	3		32562
Q9DC23	DnaJ homolog subfamily C member 10	118.64	13	5	6	8	1130000	2100000	1250000	6	6	3	3	3	Carbamidomethylation	90583
Q9DC50	Peroxisomal carnitine O-octanoyltransferase	70.07	5	3	0	3	121000		279000	2	2	1	0	1		70264
Q9DC61	Mitochondrial-processing peptidase subunit alpha	93.45	5	3	5	3	110000	266000	129000	2	2	1	2	1		58279
Q9DC69	NADH dehydrogenase [ubiquinone] 1 alpha subcomplex subunit 9 mitochondrial	88.56	7	3	3	3	0	188000	184000	2	2	1	1	1		42525
Q9DC70	NADH dehydrogenase [ubiquinone] iron-sulfur protein 7 mitochondrial	102.03	20	20	18	0	243000	188000		2	2	2	0	0	Carbamidomethylation	24683
Q9DCC4	Pyrroline-5-carboxylate reductase 3	85.07	11	11	6	11	379000	296000	423000	2	2	3	1	2	Carbamidomethylation; Pyro-glu from Q	28721
Q9DCF9	Translocon-associated protein subunit gamma	118.98	22	22	22	22	5000000	2920000	2880000	2	2	3	2	3	Pyro-glu from Q	21064
Q9DCL8	Protein phosphatase inhibitor 2	102.01	9	9	9	9	442000	449000	392000	2	2	2	2	2		23119
Q9DCT2	NADH dehydrogenase [ubiquinone] iron-sulfur protein 3 mitochondrial	118.33	21	11	16	11	1150000	1300000	1130000	4	4	2	3	2	Pyro-glu from Q	30149
Q9DCW4	Electron transfer flavoprotein subunit beta	105.08	24	0	5	20		600000	715000	4	4	0	1	3	Carbamidomethylation	27623
Q9DCX2	ATP synthase subunit d mitochondrial	153.7	48	40	29	19	9350000	3850000	4740000	5	5	5	4	2	Carbamidomethylation	18749
Q9EP69	Phosphatidylinositide phosphatase SAC1	43.63	4	0	0	4			1160000	2	2	0	0	2	Carbamidomethylation	66944
Q9EP71	Ankycorbin	47.78	4	4	4	0	625000	595000		2	2	2	0	0		108852
Q9EP72	ER membrane protein complex subunit 7	144.79	24	14	24	19	2270000	4280000	2450000	4	4	3	3	2	Pyro-glu from E	26310
Q9EPK2	Protein XRP2	90.67	9	6	6	9	944000	994000	3370000	2	2	1	1	2	Carbamidomethylation	39377
Q9EPR4	Solute carrier family 23 member 2	180.09	19	11	17	12	3600000	5960000	5120000	7	7	6	7	6	Carbamidomethylation	70049
Q9EQU5	Protein SET	167.01	35	28	24	28	40000000	33400000	42900000	6	6	6	5	5		33378
Q9ER41	Torsin-1B	86.4	9	4	9	4	183000	505000	181000	2	2	1	2	1		37818
Q9ER72	Cysteine--tRNA ligase cytoplasmic	184.38	17	12	10	9	4180000	6320000	5560000	11	11	9	7	6	Carbamidomethylation	94860
Q9ERE7	LRP chaperone MESD	96.75	13	9	4	4	0	1680000	1810000	2	2	1	1	1		25207
Q9ERG0	LIM domain and actin-binding protein 1	117.91	13	6	10	8	4180000	10300000	3950000	6	6	3	6	3	Carbamidomethylation	84060
Q9ERG2	Striatin-3	36.54	4	4	4	0	1170000	1000000		2	2	2	0	0	Carbamidomethylation	87150
Q9ERN0	Secretory carrier-associated membrane protein 2	84.11	10	6	10	6	313000	4560000	635000	2	2	1	3	1		36465
Q9ES97	Reticulon-3	161.98	6	4	4	6	1180000	1890000	2090000	5	5	4	4	5	Carbamidomethylation; Deamidation (NQ)	103879
Q9EST5	Acidic leucine-rich nuclear phosphoprotein 32 family member B	68.01	11	7	7	11	2090000	1350000	3200000	2	2	1	1	2	Carbamidomethylation	31079
Q9JHJ0	Tropomodulin-3	47.8	9	3	3	6	227000	189000	0	2	2	1	1	1		39503
Q9JHP7	Protein O-glucosyltransferase 2	94.29	9	6	3	7	821000	294000	422000	3	3	2	1	2	Pyro-glu from Q	57985
Q9JHR7	Insulin-degrading enzyme	57.49	2	2	2	0	1740000	881000		2	2	2	1	0		117772
Q9JHS3	Ragulator complex protein LAMTOR2	68.29	33	23	0	24	1650000		259000	3	3	2	0	2	Carbamidomethylation	13480
Q9JHU9	Inositol-3-phosphate synthase 1	70.73	7	2	2	7	606000	522000	558000	2	2	1	1	2	Carbamidomethylation	60932
Q9JHW2	Omega-amidase NIT2	73.87	12	5	12	0	498000	865000		2	2	1	2	0	Carbamidomethylation	30502
Q9JI75	Ribosyldihydronicotinamide dehydrogenase [quinone]	99.35	15	15	15	0	1040000	1020000		2	2	2	2	0		26248
Q9JIF7	Coatomer subunit beta	225.66	23	12	17	13	8200000	25200000	24300000	14	14	8	10	10	Carbamidomethylation	107066
Q9JIG8	PRA1 family protein 2	85.84	16	10	10	16	953000	1040000	884000	2	2	2	2	2		19478
Q9JII6	Aldo-keto reductase family 1 member A1	156.34	24	16	16	22	7140000	5170000	9690000	6	6	4	3	6	Carbamidomethylation	36587
Q9JJF9	Signal peptide peptidase-like 2A	104.03	5	5	5	5	3750000	4620000	4900000	2	2	2	2	2	Pyro-glu from Q; Deamidation (NQ)	58129
Q9JJW6	Aly/REF export factor 2	96.8	17	17	12	12	587000	253000	294000	2	2	3	1	1		23730
Q9JKR6	Hypoxia up-regulated protein 1	274.18	37	24	23	32	21800000	16400000	26500000	21	21	16	16	20	Carbamidomethylation; Deamidation (NQ)	111181
Q9JKV1	Proteasomal ubiquitin receptor ADRM1	74.43	5	5	5	5	936000	2960000	1340000	2	2	1	2	1	Carbamidomethylation	42060
Q9JKX6	ADP-sugar pyrophosphatase	50.25	13	7	0	6	149000		374000	2	2	1	0	1		23984
Q9JL15	Galectin-8	65.48	8	0	0	8			1610000	2	2	0	0	2		36162
Q9JLV5	Cullin-3	128.9	10	5	4	6	870000	1250000	622000	5	5	3	2	3	Carbamidomethylation; Pyro-glu from Q	88948
Q9QXK3	Coatomer subunit gamma-2	151.11	7	3	5	5		124000	472000	5	2	4	3	4	Carbamidomethylation; Deamidation (NQ)	97680
Q9QXS6	Drebrin	150.62	11	8	5	11	3340000	1680000	3850000	4	4	3	2	4		77287
Q9QXT0	Protein canopy homolog 2	104.84	23	23	9	14	3930000	3170000	2370000	3	3	3	1	2	Deamidation (NQ)	20767
Q9QXZ0	Microtubule-actin cross-linking factor 1	157.99	2	1	1	1	1240000	568000	948000	11	10	3	5	7	Deamidation (NQ)	831894
Q9QY76	Vesicle-associated membrane protein-associated protein B	67.66	14	0	10	9		721000	732000	3	2	0	2	2	Pyro-glu from Q	26946
Q9QYB5	Gamma-adducin	87.73	6	1	4	6	469000	1420000	2200000	3	3	1	2	3		78777
Q9QYC0	Alpha-adducin	81.58	4	2	2	4	1150000	985000	1980000	2	2	1	1	2		80647
Q9QYF1	Retinol dehydrogenase 11	60.3	8	0	8	3		585000	493000	2	2	0	2	1		35148
Q9QZ88	Vacuolar protein sorting-associated protein 29	40.99	12	7	0	12	990000		2100000	2	2	1	0	2		20496
Q9QZM0	Ubiquilin-2	162.31	9	9	6	6	2840000	1750000	1670000	4	2	5	3	3		67351
Q9QZM4	Tumor necrosis factor receptor superfamily member 10B	71.13	8	8	0	0	566000			2	2	2	0	0		42165
Q9QZN4	F-box only protein 6	63.43	13	7	9	3	267000	301000	229000	3	3	2	2	1		34492
Q9R062	Glycogenin-1	50.27	8	5	3	0	300000	400000		3	2	2	1	0		37402
Q9R087	Glypican-6	111.41	11	9	9	8	3310000	3280000	4530000	4	4	3	3	3	Carbamidomethylation; Deamidation (NQ)	63057
Q9R0A0	Peroxisomal membrane protein PEX14	93.56	22	0	14	19		862000	932000	4	4	0	3	3		41208
Q9R0B9	Procollagen-lysine 2-oxoglutarate 5-dioxygenase 2	190.59	22	16	16	8	28900000	7430000	3140000	11	11	8	8	5	Carbamidomethylation; Pyro-glu from Q; Deamidation (NQ)	84488
Q9R0E1	Multifunctional procollagen lysine hydroxylase and glycosyltransferase LH3	137.74	12	8	4	10	841000	337000	1720000	6	6	4	2	5	Pyro-glu from Q; Deamidation (NQ)	84922
Q9R0E2	Procollagen-lysine 2-oxoglutarate 5-dioxygenase 1	125.99	12	9	6	6	2290000	1150000	384000	6	6	4	3	3	Carbamidomethylation	83595
Q9R0P3	S-formylglutathione hydrolase	263.32	70	66	66	70	55400000	52800000	57000000	10	10	15	12	12	Carbamidomethylation; Deamidation (NQ)	31320
Q9R0P6	Signal peptidase complex catalytic subunit SEC11A	44.95	11	5	5	11	1060000	1280000	1350000	2	2	2	1	2		20626
Q9R0Q3	Transmembrane emp24 domain-containing protein 2	101.11	25	25	12	19	2260000	2090000	1030000	3	3	4	2	2		22705
Q9R0Q7	Prostaglandin E synthase 3	158.15	31	31	26	31	17200000	13000000	15300000	4	4	4	4	5	Carbamidomethylation	18721
Q9R0X4	Acyl-coenzyme A thioesterase 9 mitochondrial	149.69	17	12	11	14	2350000	4400000	6690000	6	6	4	4	6		50561
Q9R0Y5	Adenylate kinase isoenzyme 1	69.37	13	13	13	7	1930000	1960000	494000	2	2	2	2	1		21540
Q9R1T4	Septin-6	118.51	22	14	14	4	84200	325000		6	2	5	3	2		49620
Q9R233	Tapasin	36.24	5	3	2	0	238000	199000		2	2	1	1	0	Carbamidomethylation	49736
Q9R257	Heme-binding protein 1	75.29	22	22	0	11	1400000		375000	3	3	3	0	1		21067
Q9WTP6	Adenylate kinase 2 mitochondrial	172.92	31	25	19	26	4390000	1580000	6680000	6	5	5	3	6	Carbamidomethylation; Deamidation (NQ)	26469
Q9WTR5	Cadherin-13	103.15	12	9	5	6	3710000	3980000	2360000	4	4	3	2	2	Pyro-glu from Q	78186
Q9WU28	Prefoldin subunit 5	139.28	36	26	26	21	4590000	5370000	3170000	4	4	4	4	3		17356
Q9WUP7	Ubiquitin carboxyl-terminal hydrolase isozyme L5	48.83	7	2	5	0	513000	567000		2	2	1	1	0		37617
Q9WUQ2	Prolactin regulatory element-binding protein	52.12	6	4	2	2	665000	0	592000	2	2	1	1	1		45437
Q9WV02	RNA-binding motif protein X chromosome	75.81	10	3	10	7	1820000	3730000	3030000	3	3	1	3	3		42301
Q9WV54	Acid ceramidase	61.96	8	3	3	8	281000	369000	1660000	3	3	1	1	3		44670
Q9WV55	Vesicle-associated membrane protein-associated protein A	168.59	44	36	31	44	13100000	14100000	18500000	9	8	8	6	8		27855
Q9WVM1	Rac GTPase-activating protein 1	72.14	5	5	3	3	2150000	1400000	1030000	2	2	2	1	1	Carbamidomethylation	70159
Q9Z110	Delta-1-pyrroline-5-carboxylate synthase	50.55	4	0	2	2		681000	75700	2	2	0	1	1		87266
Q9Z1G3	V-type proton ATPase subunit C 1	91.31	14	5	0	14	394000		435000	2	2	1	0	2	Carbamidomethylation	43888
Q9Z1N5	Spliceosome RNA helicase Ddx39b	131.9	21	14	15	17	3130000	1660000	2000000	10	3	7	6	9	Carbamidomethylation	49035
Q9Z1W8	Potassium-transporting ATPase alpha chain 2	121.91	6	5	4	4	456000	4090000	4980000	6	2	5	4	6	Carbamidomethylation	114726
Q9Z1X4	Interleukin enhancer-binding factor 3	46.87	3	1	2	2	132000	441000	521000	2	2	1	1	1		96021
Q9Z247	Peptidyl-prolyl cis-trans isomerase FKBP9	89.02	10	3	3	8	1780000	1080000	1990000	4	4	2	1	3	Carbamidomethylation	62996
Q9Z2C8	Y-box-binding protein 2	174.77	27	22	16	6	2160000	215000		9	5	9	9	5	Deamidation (NQ)	38271
Q9Z2G6	Protein sel-1 homolog 1	62.29	7	2	3	4	185000	673000	486000	3	3	1	1	2		88340
Q9Z2H5	Band 4.1-like protein 1	98.85	10	3	4	8	494000	1400000	912000	6	4	2	5	4	Carbamidomethylation	98315

## Sheet: Unique EXO proteins
Accession	Description	-10lgP	Coverage (%)	Coverage (%) Sample 1	Coverage (%) Sample 2	Coverage (%) Sample 3	Area Sample 1	Area Sample 2	Area Sample 3	#Peptides	#Unique	#Spec Sample 1	#Spec Sample 2	#Spec Sample 3	PTM	Avg. Mass
A2AF47	Dedicator of cytokinesis protein 11	50.68	2	0	2	1		53600	47300	2	2	0	2	1		237769
A2AJI0	MAP7 domain-containing protein 1	128.07	9	5	7	5	781000	1670000	1140000	4	4	2	3	2	Carbamidomethylation	93276
A2AQ07	Tubulin beta-1 chain	169.65	17	15	11	15	1630000	1640000	2550000	9	3	9	6	10	Carbamidomethylation; Oxidation (M)	50441
A2AR02	Peptidyl-prolyl cis-trans isomerase G	66.41	2	2	2	2	590000	747000	578000	2	2	1	2	1	Carbamidomethylation	88325
B0V2N1	Receptor-type tyrosine-protein phosphatase S	89.73	2	0	1	2		456000	1010000	2	2	0	1	2	Carbamidomethylation	211902
B1AZI6	THO complex subunit 2	42.76	3	0	2	1		0	268000	2	2	0	1	1		182772
B2RUR8	OTU domain-containing protein 7B	78.2	5	0	2	5		208000	418000	2	2	0	1	2		91984
B2RY56	RNA-binding protein 25	95.07	7	3	7	3	1360000	1910000	1030000	5	5	3	5	2		99552
E9Q414	Apolipoprotein B-100	58.93	1	0	0	1	581000	900000	1640000	2	2	1	1	2		509437
E9Q555	E3 ubiquitin-protein ligase RNF213	156.76	2	2	1	1	3070000	354000	286000	8	8	7	4	3	Carbamidomethylation; Oxidation (M); Deamidation (NQ)	584791
E9Q634	Unconventional myosin-Ie	148.94	9	4	3	7	1180000	1630000	1810000	6	5	3	2	4	Pyro-glu from Q	126818
F6SEU4	Ras/Rap GTPase-activating protein SynGAP	41.66	4	2	0	4	1720000		155000	2	2	1	0	2	Oxidation (M)	148238
F7BWT7	Tetraspanin-15	113.42	15	8	11	12	885000	1090000	1010000	3	3	1	2	2	Carbamidomethylation	33071
G5E870	E3 ubiquitin-protein ligase TRIP12	68.41	2	0	1	1		190000	253000	3	3	0	2	2		224126
O08688	Calpain-5	57.05	6	3	6	0	606000	1420000		2	2	1	2	0		72955
O09106	Histone deacetylase 1	99.75	12	10	6	9	554000	416000	495000	3	2	2	1	2	Carbamidomethylation; Pyro-glu from Q	55075
O09118	Netrin-1	153.78	16	10	9	9	4930000	4590000	4680000	6	6	5	4	5	Carbamidomethylation	67810
O35382	Exocyst complex component 4	72.54	3	0	3	3		491000	570000	2	2	0	2	2		110545
O35454	Chloride transport protein 6	88.17	4	2	2	4	271000	332000	409000	2	2	1	1	2	Carbamidomethylation	96980
O54692	Centromere/kinetochore protein zw10 homolog	149.37	11	11	4	6	913000	873000	618000	5	5	5	3	3	Carbamidomethylation; Pyro-glu from Q	88063
O54941	SWI/SNF-related matrix-associated actin-dependent regulator of chromatin subfamily E member 1	66.12	10	3	7	4	153000	762000	255000	3	3	1	2	1		46638
O54962	Barrier-to-autointegration factor	123.12	47	40	40	47	3540000	3450000	7050000	4	4	2	2	3		10103
O55098	Serine/threonine-protein kinase 10	40.65	3	0	3	3		230000	236000	2	2	0	0	2		111906
O55142	60S ribosomal protein L35a	51.79	15	8	8	15	52100000	53500000	9650000	3	3	1	1	2		12554
O55201	Transcription elongation factor SPT5	84.05	3	2	2	3	99700	0	435000	2	2	1	1	2		120664
O55222	Integrin-linked protein kinase	148.78	26	20	17	8	7540000	5400000	2980000	8	8	7	5	3	Carbamidomethylation	51373
O55234	Proteasome subunit beta type-5	223.61	50	35	40	41	51200000	46100000	39300000	11	11	12	11	10	Carbamidomethylation	28532
O70311	Glycylpeptide N-tetradecanoyltransferase 2	119.98	12	2	4	12		431000	786000	4	2	1	1	4	Carbamidomethylation	60484
O70326	Gremlin-1	97.86	15	8	15	0	2300000	3050000		2	2	1	2	0	Carbamidomethylation	20710
O70551	SRSF protein kinase 1	127.78	12	10	12	5	1930000	2450000	966000	5	5	4	5	2	Carbamidomethylation	73089
O88322	Nidogen-2	274.7	26	19	18	14	29500000	28800000	22300000	22	21	14	16	14	Carbamidomethylation; Deamidation (NQ)	153913
O88693	Ceramide glucosyltransferase	206.38	34	28	21	23	4950000	11100000	9180000	10	10	7	5	8	Carbamidomethylation; Pyro-glu from Q	44839
O88746	Target of Myb protein 1	113.88	17	14	3	6	1610000	632000	862000	4	4	3	1	2	Oxidation (M)	54325
O88783	Coagulation factor V	127.59	2	1	2	1	2680000	3380000	973000	3	3	2	4	2	Carbamidomethylation	247228
O88796	Ribonuclease P protein subunit p30	141.75	29	16	29	12	1400000	5340000	939000	5	5	4	5	2	Carbamidomethylation	29473
O88895	Histone deacetylase 3	39.26	7	3	0	4	76800		97300	2	2	1	0	1		48364
O89013	Leptin receptor gene-related protein	67.7	11	0	11	11		225000	833000	2	2	0	1	2	Carbamidomethylation	14316
O89032	SH3 and PX domain-containing protein 2A	49.38	2	0	1	2		291000	130000	2	2	0	1	1		124201
O89051	Integral membrane protein 2B	137.73	15	15	15	11	14100000	12100000	9880000	4	4	3	3	3	Carbamidomethylation	30260
P00687	Alpha-amylase 1	37.94	4	2	2	0	274000	1060000		2	2	1	1	0		57644
P00688	Pancreatic alpha-amylase	37.94	4	2	2	0	274000	1060000		2	2	1	1	0		57318
P01027	Complement C3	159.06	4	4	3	4	68200000	50000000	68000000	7	6	5	4	6	Carbamidomethylation	186483
P01942	Hemoglobin subunit alpha	96.78	17	17	17	17	54300000	57400000	56500000	2	2	3	3	4		15085
P02468	Laminin subunit gamma-1	265.54	22	16	13	14	13900000	11500000	14700000	20	20	15	12	14	Carbamidomethylation; Pyro-glu from Q	177298
P07724	Serum albumin	150.13	7	7	7	7	55500000	54700000	57800000	3	3	4	4	4	Carbamidomethylation	68693
P08775	DNA-directed RNA polymerase II subunit RPB1	158.83	5	4	3	3	3870000	1090000	1750000	7	7	5	4	5	Carbamidomethylation	217174
P0C0S6	Histone H2A.Z	205.61	54	54	48	46	30100000	30400000	18600000	7	5	8	8	10	Deamidation (NQ)	13553
P10853	Histone H2B type 1-F/J/L	165.03	29	29	29	20	347000000	336000000	216000000	5	5	10	11	9	Oxidation (M); Pyro-glu from Q; Deamidation (NQ)	13936
P10854	Histone H2B type 1-M	165.03	29	29	29	20	347000000	336000000	216000000	5	5	10	11	9	Oxidation (M); Pyro-glu from Q; Deamidation (NQ)	13936
P11152	Lipoprotein lipase	149.06	16	8	10	6	4020000	3690000	1870000	5	5	3	3	2		53109
P15116	Cadherin-2	118.48	5	3	5	3	1590000	2860000	1180000	3	3	2	3	3	Carbamidomethylation; Pyro-glu from Q; Deamidation (NQ)	99796
P16125	L-lactate dehydrogenase B chain	98.39	10	10	4	4	876000	600000	632000	3	2	3	1	1	Carbamidomethylation	36572
P17047	Lysosome-associated membrane glycoprotein 2	92.42	9	4	4	4	9940000	12600000	9440000	4	4	2	2	2		45681
P17156	Heat shock-related 70 kDa protein 2	251.61	24	20	17	11	9240000	5110000	5210000	13	3	17	13	13	Deamidation (NQ)	69642
P19221	Prothrombin	187.94	9	9	9	9	25900000	28600000	22100000	5	5	8	7	7	Carbamidomethylation; Oxidation (M)	70269
P20060	Beta-hexosaminidase subunit beta	57.82	6	0	3	3		285000	90700	2	2	0	1	1	Carbamidomethylation	61116
P20918	Plasminogen	39.12	2	0	2	2		2330000	2450000	2	2	0	0	2	Carbamidomethylation	90808
P21447	Multidrug resistance protein 1A	145.18	4	4	2	2	553000	266000	347000	2	2	2	1	1		140646
P25206	DNA replication licensing factor MCM3	216.56	24	13	20	14	3910000	8490000	3270000	9	9	8	12	5	Carbamidomethylation	91546
P27048	Small nuclear ribonucleoprotein-associated protein B	69.8	21	0	21	6		1580000	1420000	2	2	0	2	1	Carbamidomethylation; Oxidation (M); Deamidation (NQ)	23656
P28481	Collagen alpha-1(II) chain	55.15	6	4	1	0	708000	2330		4	3	3	1	0		141974
P28665	Murinoglobulin-1	90.38	3	1	1	3	28500000	26600000	29600000	4	2	2	2	4	Carbamidomethylation; Deamidation (NQ)	165297
P28666	Murinoglobulin-2	90.38	3	1	1	3	28500000	26600000	29600000	4	2	2	2	4	Carbamidomethylation; Deamidation (NQ)	162381
P32261	Antithrombin-III	88.15	10	2	10	7	1130000	2630000	2770000	3	3	2	3	3	Deamidation (NQ)	52004
P32921	Tryptophan--tRNA ligase cytoplasmic	172.16	27	17	17	19	9200000	10400000	9460000	9	9	5	6	6	Carbamidomethylation	54358
P33146	Cadherin-15	73.6	4	0	4	4		499000	507000	2	2	0	0	2		85644
P33215	Protein NEDD1	97.2	9	6	6	3	102000	353000	213000	3	3	2	2	1	Carbamidomethylation	71292
P35288	Ras-related protein Rab-23	79.2	12	0	11	8		391000	213000	3	3	0	2	2	Pyro-glu from Q	26678
P35441	Thrombospondin-1	123.8	9	2	7	8	2680000	5650000	4090000	8	7	2	6	6	Carbamidomethylation	129647
P35550	rRNA 2'-O-methyltransferase fibrillarin	190.96	46	23	21	37	3470000	2840000	1330000	9	6	5	6	7	Carbamidomethylation; Deamidation (NQ)	34307
P35822	Receptor-type tyrosine-protein phosphatase kappa	81.73	4	2	2	2	850000	1670000	1010000	4	4	2	3	2	Carbamidomethylation; Pyro-glu from Q	164185
P35951	Low-density lipoprotein receptor	83.74	5	0	5	1		3940000	1240000	3	3	0	3	1	Carbamidomethylation	94947
P36895	Bone morphogenetic protein receptor type-1A	69.6	7	0	3	4		349000	104000	2	2	0	1	1		60063
P37889	Fibulin-2	270.79	27	11	21	24	20800000	27000000	26700000	20	20	10	20	18	Carbamidomethylation	131834
P37913	DNA ligase 1	69.58	5	3	0	4	571000		518000	3	3	2	0	2		102290
P39061	Collagen alpha-1(XVIII) chain	107.98	6	2	3	2	41600	785000	407000	5	5	1	3	2	Oxidation (M); Pyro-glu from E	182171
P39688	Tyrosine-protein kinase Fyn	108.34	13	9	6	5	35800	30600	37500	6	2	5	3	2		60675
P43029	Growth/differentiation factor 7	52.79	7	7	6	7	438000	71700	372000	2	2	1	1	1	Deamidation (NQ)	47891
P43274	Histone H1.4	199.12	25	24	25	23	29500000	31500000	30500000	9	3	10	9	9		21977
P45481	CREB-binding protein	51.73	2	1	1	0	108000	76400		2	2	1	1	0	Pyro-glu from Q	265491
P46467	Vacuolar protein sorting-associated protein 4B	165.1	23	10	18	13	5250000	7100000	5840000	7	7	3	6	4	Carbamidomethylation	49419
P47857	ATP-dependent 6-phosphofructokinase muscle type	67.29	7	2	1	5	387000		574000	4	3	1	1	3	Oxidation (M)	85269
P48722	Heat shock 70 kDa protein 4L	103.58	5	5	2	2	388000	205000	444000	3	2	3	1	1	Carbamidomethylation	94382
P48758	Carbonyl reductase [NADPH] 1	62.17	13	0	9	4		0	382000	3	2	0	2	1	Carbamidomethylation	30641
P49717	DNA replication licensing factor MCM4	164.89	18	9	11	10	6860000	6520000	4650000	13	13	9	7	8	Carbamidomethylation; Pyro-glu from Q	96736
P49718	DNA replication licensing factor MCM5	130.38	11	7	5	4	6100000	3380000	1940000	6	6	4	3	2	Carbamidomethylation; Pyro-glu from Q	82343
P49722	Proteasome subunit alpha type-2	216.19	43	37	35	43	19600000	21200000	32300000	7	7	5	7	9	Deamidation (NQ)	25927
P50446	Keratin type II cytoskeletal 6A	135.97	13	8	11	2	1360000	1750000		7	2	5	7	2	Carbamidomethylation	59335
P51807	Dynein light chain Tctex-type 1	50.12	37	0	16	37		80800	127000	2	2	0	1	2	Carbamidomethylation; Deamidation (NQ)	12483
P51885	Lumican	112.27	13	12	9	13	9520000	7360000	11300000	4	4	3	3	5		38265
P52332	Tyrosine-protein kinase JAK1	75.67	4	3	1	1	128000	859000	105000	3	3	2	1	1	Carbamidomethylation	133367
P52480	Pyruvate kinase PKM	369.93	59	57	49	57	419000000	418000000	459000000	30	29	36	34	39	Carbamidomethylation; Oxidation (M); Deamidation (NQ)	57845
P53026	60S ribosomal protein L10a	199.18	38	34	37	34	71700000	96900000	49500000	10	10	10	10	9	Carbamidomethylation	24916
P53657	Pyruvate kinase PKLR	70.25	7	5	3	2	0	138000		3	2	2	1	1	Deamidation (NQ)	62309
P54320	Elastin	53.74	2	2	2	2	5600000	1740000	4010000	2	2	2	1	2		71938
P54728	UV excision repair protein RAD23 homolog B	85.78	9	5	5	9	347000	154000	1160000	2	2	2	1	4	Pyro-glu from Q	43513
P54754	Ephrin type-B receptor 3	141.64	7	0	3	5		374000	403000	5	2	0	2	4	Carbamidomethylation	109662
P54761	Ephrin type-B receptor 4	135.53	7	0	3	7		418000	508000	5	2	0	2	5	Carbamidomethylation	108848
P55065	Phospholipid transfer protein	131.44	18	13	11	6	4670000	5300000	2350000	6	6	6	6	2		54453
P55264	Adenosine kinase	131.13	19	13	16	15	605000	1480000	851000	4	4	2	3	4	Carbamidomethylation	40149
P56183	Ribosomal RNA processing protein 1 homolog A	56.34	9	3	0	5	18100		53100	2	2	1	0	4	Pyro-glu from Q	54777
P56485	Atypical chemokine receptor 3	113.17	7	7	7	4	1870000	1920000	787000	2	2	2	2	1	Carbamidomethylation	41636
P58022	Lysyl oxidase homolog 2	121.17	6	2	6	0	733000	1260000		3	3	1	3	0	Carbamidomethylation	87003
P58854	Gamma-tubulin complex component 3	148.71	9	5	6	4	1990000	1870000	1150000	6	6	3	4	3	Carbamidomethylation	103469
P59108	Copine-2	73.54	5	5	5	0	1240000	1430000		2	2	2	2	0		61036
P59708	Splicing factor 3B subunit 6	103.43	32	11	21	21	757000	1000000	908000	3	3	1	2	2	Carbamidomethylation	14585
P62996	Transformer-2 protein homolog beta	159.68	24	18	16	19	6930000	6940000	6110000	5	5	3	4	4	Carbamidomethylation	33666
P63082	V-type proton ATPase 16 kDa proteolipid subunit	130.57	54	32	42	20	884000	520000	357000	3	3	2	2	1		15808
P69566	Ran-binding protein 9	69.77	6	4	2	2	330000	480000	188000	2	2	1	1	1		71012
P70182	Phosphatidylinositol 4-phosphate 5-kinase type-1 alpha	64.1	6	6	3	3	404000	275000	243000	2	2	2	1	1	Deamidation (NQ)	60485
P70279	Surfeit locus protein 6	53.84	6	3	0	6	252000		1410000	2	2	1	0	2		41235
P70280	Vesicle-associated membrane protein 7	79.16	22	0	10	12		225000	1850000	3	3	0	1	2	Carbamidomethylation	24967
P70699	Lysosomal alpha-glucosidase	78.68	4	2	4	2	108000	577000	168000	2	2	1	2	2	Pyro-glu from Q	106248
P83870	PHD finger-like domain-containing protein 5A	79.66	26	26	12	12	914000	775000	914000	2	2	2	1	1	Carbamidomethylation	12405
P97298	Pigment epithelium-derived factor	152.33	14	8	14	11	4070000	13900000	14600000	4	4	2	4	3	Carbamidomethylation	46234
P97311	DNA replication licensing factor MCM6	181.07	17	8	12	8	2780000	7550000	4140000	10	10	5	7	5	Carbamidomethylation; Deamidation (NQ)	92867
P97314	Cysteine and glycine-rich protein 2	81.14	15	7	7	15	947000	772000	1590000	2	2	1	1	2	Carbamidomethylation	20926
P97452	Ribosome biogenesis protein BOP1	145.15	16	12	11	4	3550000	1320000	605000	5	5	5	3	1	Carbamidomethylation; Deamidation (NQ)	82546
P97496	SWI/SNF complex subunit SMARCC1	118.05	9	3	7	5	345000	2710000	80700	6	4	3	4	2	Carbamidomethylation; Oxidation (M)	122890
P97499	Telomerase protein component 1	130.18	7	3	1	4	1740000	583000	1340000	10	10	5	3	6	Carbamidomethylation; Pyro-glu from Q	291458
P97801	Survival motor neuron protein	48.2	15	0	9	6		621000	296000	2	2	0	1	1	Carbamidomethylation; Deamidation (NQ)	31254
P98063	Bone morphogenetic protein 1	81.52	6	4	3	4	2820000	344000	185000	4	4	3	2	2	Carbamidomethylation	111666
Q00560	Interleukin-6 receptor subunit beta	158.47	10	5	5	7	633000	1100000	4310000	5	5	3	2	3	Carbamidomethylation; Pyro-glu from Q	102451
Q00993	Tyrosine-protein kinase receptor UFO	85	4	2	4	2	859000	1080000	671000	2	2	1	2	1		98191
Q03350	Thrombospondin-2	134.72	5	3	2	3	655000	307000	730000	5	4	3	2	3	Carbamidomethylation	129882
Q04690	Neurofibromin	67	1	1	1	1	175000	127000	105000	2	2	2	1	1		319595
Q04736	Tyrosine-protein kinase Yes	109.24	17	17	7	6	411000	68800	67300	7	3	7	3	2	Carbamidomethylation	60630
Q04750	DNA topoisomerase 1	109.95	8	3	2	5	387000	1360000	1470000	4	4	2	3	2	Carbamidomethylation	90876
Q04857	Collagen alpha-1(VI) chain	48.32	4	0	2	2		9290	634000	2	2	0	1	1		108489
Q05793	Basement membrane-specific heparan sulfate proteoglycan core protein	453.37	37	26	31	28	179000000	216000000	220000000	84	84	74	93	89	Carbamidomethylation; Oxidation (M); Pyro-glu from E; Pyro-glu from Q; Deamidation (NQ)	398295
Q07797	Galectin-3-binding protein	218.25	28	13	22	22	11600000	19000000	16700000	9	9	5	9	8	Carbamidomethylation	64491
Q08879	Fibulin-1	68.93	6	2	6	4	2100000	3940000	1190000	2	2	1	2	1	Carbamidomethylation	78033
Q08943	FACT complex subunit SSRP1	85.92	7	4	5	4	0	411000	183000	4	4	2	3	2	Carbamidomethylation; Pyro-glu from Q	80860
Q09143	High affinity cationic amino acid transporter 1	136.08	10	5	8	7	3270000	3950000	2740000	3	3	1	2	2		67092
Q0VGY8	Protein TANC1	88.92	2	2	1	0	190000	157000		2	2	2	1	0	Pyro-glu from Q	200803
Q1HFZ0	tRNA (cytosine(34)-C(5))-methyltransferase	71.08	4	4	3	3	643000	567000	715000	2	2	2	1	1		85452
Q2UY11	Collagen alpha-1(XXVIII) chain	47.03	7	2	2	3	1400000	40400	0	3	3	1	1	1	Deamidation (NQ)	118749
Q3TD49	Signal peptide peptidase-like 2B	84.1	7	0	3	5		163000	343000	2	2	0	1	1	Carbamidomethylation	63824
Q3TEA8	Heterochromatin protein 1-binding protein 3	115.77	14	7	4	11	1290000	500000	1760000	4	4	2	1	3		60867
Q3THS6	S-adenosylmethionine synthase isoform type-2	49.74	10	0	6	4		457000	1340000	2	2	0	2	1	Carbamidomethylation	43689
Q3THW5	Histone H2A.V	205.61	54	54	48	46	30100000	30400000	18600000	7	5	8	8	10	Deamidation (NQ)	13509
Q3TIX9	U4/U6.U5 tri-snRNP-associated protein 2	74.82	6	6	6	3	589000	478000	293000	2	2	3	2	1		65146
Q3TWL2	Type 1 phosphatidylinositol 4 5-bisphosphate 4-phosphatase	53.3	8	4	0	4	1050000		668000	2	2	1	0	1	Carbamidomethylation	30047
Q3U2C5	E3 ubiquitin-protein ligase RNF149	94.18	11	8	6	5	521000	479000	108000	3	3	2	2	1	Carbamidomethylation	42553
Q3U487	E3 ubiquitin-protein ligase HECTD3	60.76	3	3	3	2	241000	388000	147000	2	2	2	2	1		97347
Q3U821	WD repeat-containing protein 75	71.37	4	4	4	4	184000	252000	326000	2	2	3	2	2	Pyro-glu from Q	94037
Q3U962	Collagen alpha-2(V) chain	65.46	3	3	1	1	10500000	120000	144000	3	3	3	1	1		145018
Q3UQ28	Peroxidasin homolog	191.45	11	5	6	4	2080000	2670000	1200000	10	10	6	6	3	Carbamidomethylation; Deamidation (NQ)	165102
Q3URQ0	Testis-expressed protein 10	89.58	5	4	1	3	71000	156000	304000	3	3	2	1	2		105209
Q3USZ8	Divergent protein kinase domain 2A	69.6	7	5	2	7	1050000	521000	1390000	2	2	1	1	2	Carbamidomethylation	49463
Q3V1G4	Olfactomedin-like protein 2B	124.59	10	2	6	2	114000	229000	153000	5	5	1	3	1	Carbamidomethylation	83503
Q3V1L4	Cytosolic purine 5'-nucleotidase	52.38	6	0	2	4		194000	268000	2	2	0	1	1		64809
Q501J6	Probable ATP-dependent RNA helicase DDX17	208.55	31	19	20	18	3770000	3430000	3010000	17	8	11	10	10	Carbamidomethylation; Pyro-glu from Q	72400
Q569Z5	Probable ATP-dependent RNA helicase DDX46	70.3	3	3	3	0	1090000	1220000		3	3	3	0	0		117448
Q5EG47	5'-AMP-activated protein kinase catalytic subunit alpha-1	117.17	7	2	3	4	480000	327000	880000	3	3	1	1	2	Carbamidomethylation	63929
Q5SSW2	Proteasome activator complex subunit 4	99.24	4	1	3	2	384000	1640000	1160000	5	5	2	3	3	Carbamidomethylation	211195
Q5SUQ9	CST complex subunit CTC1	62.69	4	2	1	1	71300	340000	316000	2	2	1	1	1	Carbamidomethylation	134028
Q5SW19	Clustered mitochondria protein homolog	108.81	9	6	3	3	1620000	1430000	258000	7	7	5	4	2	Carbamidomethylation	148068
Q5SWD9	Pre-rRNA-processing protein TSR1 homolog	117.93	9	2	5	4	980000	862000	778000	4	4	1	2	2	Pyro-glu from Q	92105
Q5SWU9	Acetyl-CoA carboxylase 1	206.43	12	5	9	4	5740000	11000000	5320000	19	19	10	14	6	Carbamidomethylation; Pyro-glu from Q	265254
Q5XG71	Small subunit processome component 20 homolog	78.69	2	2	1	1	83800	38300	24700	3	3	3	1	1		317744
Q60668	Heterogeneous nuclear ribonucleoprotein D0	121.67	16	6	16	16	3410000	3060000	3410000	3	3	2	3	3		38354
Q60716	Prolyl 4-hydroxylase subunit alpha-2	139.84	23	15	17	11	3590000	4120000	2240000	7	7	5	5	4	Carbamidomethylation	61002
Q60749	KH domain-containing RNA-binding signal transduction-associated protein 1	90.9	8	8	8	0	2290000	2080000		2	2	2	2	0		48371
Q60790	Ras GTPase-activating protein 3	80.86	7	5	0	2	981000		223000	4	4	3	0	1	Carbamidomethylation; Pyro-glu from Q	95987
Q60847	Collagen alpha-1(XII) chain	174.32	7	3	3	3	898000	2830000	2610000	12	12	4	6	5	Deamidation (NQ)	340215
Q60960	Importin subunit alpha-5	50.29	7	0	7	3		36500	0	2	2	0	2	1	Carbamidomethylation	60183
Q61033	Lamina-associated polypeptide 2 isoforms alpha/zeta	99.13	8	0	5	6		564000	513000	3	3	0	2	2	Carbamidomethylation	75168
Q61136	Serine/threonine-protein kinase PRP4 homolog	77.33	3	3	2	2	244000	137000	78700	2	2	3	2	1	Deamidation (NQ)	116976
Q61151	Serine/threonine-protein phosphatase 2A 56 kDa regulatory subunit epsilon isoform	50.65	6	0	3	3		587000	118000	2	2	0	1	1	Carbamidomethylation	54714
Q61210	Rho guanine nucleotide exchange factor 1	139.56	8	4	6	2	614000	574000	131000	5	5	2	4	1	Pyro-glu from Q	102804
Q61398	Procollagen C-endopeptidase enhancer 1	220.34	49	27	40	24	11900000	9480000	8200000	14	14	9	11	7	Carbamidomethylation	50168
Q61609	Sodium-dependent phosphate transporter 1	92.47	8	5	6	3	138000	313000	179000	4	4	3	3	2	Carbamidomethylation; Pyro-glu from Q; Deamidation (NQ)	74153
Q61703	Inter-alpha-trypsin inhibitor heavy chain H2	130.17	5	4	3	3	18000000	16600000	8250000	5	5	4	3	3		105928
Q61704	Inter-alpha-trypsin inhibitor heavy chain H3	121.64	5	4	2	3	14200000	10900000	7360000	5	5	4	2	2		99358
Q61838	Pregnancy zone protein	87.77	3	1	1	2	1300000	2720000	5450000	4	2	2	2	3	Deamidation (NQ)	165852
Q61881	DNA replication licensing factor MCM7	267.44	34	23	27	20	18800000	18700000	20400000	16	16	12	13	12	Carbamidomethylation; Pyro-glu from Q	81211
Q62000	Mimecan	131.85	18	5	5	18	341000	416000	935000	4	4	2	2	6	Carbamidomethylation; Deamidation (NQ)	34012
Q62059	Versican core protein	243.81	7	6	5	5	51500000	38000000	34100000	16	16	18	16	15	Carbamidomethylation; Pyro-glu from Q; Deamidation (NQ)	366788
Q62177	Semaphorin-3B	177.73	20	9	9	11	3360000	3500000	3990000	9	9	4	4	5	Carbamidomethylation	82700
Q62219	Transforming growth factor beta-1-induced transcript 1 protein	49.2	5	3	2	2	0	426000	456000	2	2	1	1	1	Carbamidomethylation	50101
Q62448	Eukaryotic translation initiation factor 4 gamma 2	60.69	5	1	2	3	96900	521000	246000	3	3	1	2	1		102105
Q62470	Integrin alpha-3	293.5	36	32	22	27	59100000	51600000	49800000	23	23	23	16	21	Carbamidomethylation; Deamidation (NQ)	116745
Q63844	Mitogen-activated protein kinase 3	143.17	23	14	8	11	2100000		2280000	6	3	4	2	3	Carbamidomethylation	43067
Q64008	Ras-related protein Rab-34	142.28	27	8	19	18	279000	1980000	1560000	6	5	2	4	5	Carbamidomethylation	29101
Q64012	RNA-binding protein Raly	153.09	21	21	11	4	14300000	4020000	2390000	4	4	6	2	1		33188
Q640N1	Adipocyte enhancer-binding protein 1	67.38	3	0	2	1		436000	721000	2	2	0	1	1		128365
Q64478	Histone H2B type 1-H	165.03	29	29	29	20	347000000	336000000	216000000	5	5	10	11	9	Oxidation (M); Pyro-glu from Q; Deamidation (NQ)	13920
Q64511	DNA topoisomerase 2-beta	132.2	8	5	3	1	1170000	220000		8	5	5	3	2	Carbamidomethylation; Deamidation (NQ)	181908
Q64525	Histone H2B type 2-B	165.03	29	29	29	20	347000000	336000000	216000000	5	5	10	11	9	Oxidation (M); Pyro-glu from Q; Deamidation (NQ)	13920
Q68FH0	Plakophilin-4	36.43	2	0	1	1		98600	22200	2	2	0	1	1		131551
Q68FL4	Putative adenosylhomocysteinase 3	72.7	5	3	3	1	400000	455000		4	2	3	2	1	Carbamidomethylation	66899
Q6A4J8	Ubiquitin carboxyl-terminal hydrolase 7	76.03	3	1	3	1	154000	519000	146000	2	2	1	2	1		128475
Q6GQT1	Alpha-2-macroglobulin-P	172.89	3	3	3	3	246000000	253000000	246000000	4	3	11	10	13	Oxidation (M)	164352
Q6IFZ6	Keratin type II cytoskeletal 1b	128.51	9	6	7	6	28100000	87300	26100000	5	2	4	4	5	Deamidation (NQ)	61359
Q6KAU4	Multivesicular body subunit 12B	162.79	26	26	26	7	2430000	2300000	798000	4	4	4	5	2		35411
Q6P2B1	Transportin-3	69.22	4	0	4	4		229000	189000	2	2	0	2	2	Carbamidomethylation; Deamidation (NQ)	104170
Q6P4S8	Integrator complex subunit 1	84.79	2	1	0	2	140000		174000	2	2	1	0	2	Pyro-glu from Q	245165
Q6P5B0	RRP12-like protein	105.08	3	1	0	2	238000		394000	2	2	1	0	1	Carbamidomethylation	143131
Q6P9Q4	FH1/FH2 domain-containing protein 1	61.88	3	3	3	0	262000	222000		2	2	3	0	0	Deamidation (NQ)	129600
Q6PB93	Polypeptide N-acetylgalactosaminyltransferase 2	48.21	5	5	5	0	582000	544000		2	2	2	0	0		64515
Q6PDQ2	Chromodomain-helicase-DNA-binding protein 4	95.95	2	2	1	2	1770000	541000	759000	3	3	2	1	2		217749
Q6PFR5	Transformer-2 protein homolog alpha	48.47	10	7	0	3	84000		394000	2	2	1	0	1		32316
Q6PGC1	ATP-dependent RNA helicase DHX29	163.33	9	8	6	2	2320000	1580000	740000	8	8	7	5	2	Carbamidomethylation	153975
Q6R0H7	Guanine nucleotide-binding protein G(s) subunit alpha isoforms XLas	219.58	16	14	12	12	25700000	25500000	14300000	15	13	14	11	14	Carbamidomethylation; Deamidation (NQ)	121505
Q6ZPE2	Myotubularin-related protein 5	82.55	3	2	1	1	137000	362000	346000	3	3	2	1	1	Carbamidomethylation	208691
Q6ZQ08	CCR4-NOT transcription complex subunit 1	82.1	2	1	2	0	448000	712000	134000	4	4	2	4	1		266805
Q6ZQ58	La-related protein 1	97.32	6	4	3	4	1770000	1630000	1850000	3	3	2	2	2		121125
Q6ZQL4	WD repeat-containing protein 43	82.57	7	3	7	3	118000	202000	123000	2	2	1	2	3		75381
Q6ZWY3	40S ribosomal protein S27-like	125.76	39	38	29	30	16800000	18900000	10400000	4	2	4	3	5	Carbamidomethylation; Oxidation (M)	9477
Q6ZWY9	Histone H2B type 1-C/E/G	165.03	29	29	29	20	347000000	336000000	216000000	5	5	10	11	9	Oxidation (M); Pyro-glu from Q; Deamidation (NQ)	13906
Q78HU3	Multivesicular body subunit 12A	104.26	12	6	6	12	1740000	1740000	1990000	2	2	1	1	2		28705
Q7TMM9	Tubulin beta-2A chain	346.94	75	69	68	57	7250000	170000		32	2	39	37	41	Carbamidomethylation; Oxidation (M); Pyro-glu from Q; Deamidation (NQ)	49907
Q7TN16	Hedgehog-interacting protein	49.94	4	2	2	1	339000	504000	78200	2	2	1	1	1	Carbamidomethylation	78513
Q7TPD0	Integrator complex subunit 3	177.78	3	3	3	3	5720000	673000	98400	5	5	3	3	1		117938
Q7TSC1	Protein PRRC2A	82.05	4	3	2	1	1490000	497000	450000	4	4	3	2	1		229200
Q7TT37	Elongator complex protein 1	184.24	10	8	6	5	3590000	691000	2940000	8	8	8	3	4		149583
Q7TT50	Serine/threonine-protein kinase MRCK beta	104.08	3	2	1	2	642000	489000	422000	3	3	2	1	2		194751
Q80SW1	S-adenosylhomocysteine hydrolase-like protein 1	72.7	6	4	4	2	0	455000		4	2	3	2	1	Carbamidomethylation	58952
Q80TA9	Ectopic P granules protein 5 homolog	67.82	1	1	0	1	11300		223000	2	2	1	0	1		290799
Q80TM9	Nischarin	161.2	5	2	4	4	357000	365000	513000	5	5	2	3	4	Carbamidomethylation	175011
Q80TP3	E3 ubiquitin-protein ligase UBR5	40.71	2	1	0	1	157000		87300	2	2	1	0	1	Deamidation (NQ)	308351
Q80UK8	Integrator complex subunit 2	79.44	4	4	2	2	107000	51800	43600	2	2	2	1	1	Carbamidomethylation	133515
Q80UY2	E3 ubiquitin-protein ligase KCMF1	99.24	8	8	8	8	255000	259000	186000	2	2	3	3	2		41791
Q80YQ2	Mediator of RNA polymerase II transcription subunit 23	90.92	6	0	1	6		365000	843000	4	4	0	1	4	Carbamidomethylation; Deamidation (NQ)	156087
Q80YX1	Tenascin	338.23	26	21	20	15	38800000	38400000	26600000	37	37	31	28	21	Carbamidomethylation; Pyro-glu from Q; Deamidation (NQ)	231805
Q8BFQ4	WD repeat-containing protein 82	119.64	11	4	11	4	1790000	1440000	1670000	2	2	2	3	2		35079
Q8BGA5	KRR1 small subunit processome component homolog	54.26	7	7	7	0	386000	299000		2	2	2	0	0	Carbamidomethylation	43538
Q8BGE6	Cysteine protease ATG4B	84.08	13	0	8	5		218000	290000	3	3	0	2	1	Carbamidomethylation; Pyro-glu from Q	44375
Q8BGN6	Transmembrane gamma-carboxyglutamic acid protein 4	109.42	18	18	18	5	958000	709000	766000	2	2	2	2	2		25401
Q8BGZ4	Cell division cycle protein 23 homolog	72.19	5	2	5	2	245000	1160000	371000	2	2	1	2	2	Carbamidomethylation; Pyro-glu from Q	68562
Q8BHJ6	Serine incorporator 5	164.43	13	13	7	7	2160000	3150000	1540000	4	4	4	3	2	Carbamidomethylation; Pyro-glu from Q	51831
Q8BHL5	Engulfment and cell motility protein 2	57.88	7	0	4	3		782000	284000	3	3	0	3	1		83887
Q8BKG3	Inactive tyrosine-protein kinase 7	58.41	3	0	3	3		527000	500000	2	2	0	2	0		117532
Q8BKN5	Gamma-tubulin complex component 5	93.29	4	2	0	1	196000		80600	2	2	1	0	1	Carbamidomethylation	117977
Q8BKS9	Pumilio homolog 3	124.54	17	10	10	9	1300000	615000	1780000	6	6	4	4	3	Carbamidomethylation; Pyro-glu from Q	72800
Q8BMB3	Eukaryotic translation initiation factor 4E type 2	43.21	12	5	5	7	95800	141000	578000	2	2	1	1	1	Pyro-glu from Q	28263
Q8BMQ2	General transcription factor 3C polypeptide 4	66.7	4	2	4	0	42700	67400		2	2	1	2	0	Pyro-glu from Q	91613
Q8BTW3	Exosome complex component MTR3	62.84	15	6	6	9	228000	251000	326000	2	2	1	1	2	Deamidation (NQ)	28370
Q8BU31	Ras-related protein Rap-2c	151.35	40	32	13	34	183000	181000	134000	5	2	4	2	4		20745
Q8BV57	Soluble scavenger receptor cysteine-rich domain-containing protein SSC5D	98.41	3	2	2	3	206000	196000	431000	3	3	3	2	3	Carbamidomethylation; Pyro-glu from E; Pyro-glu from Q	144636
Q8BVL3	Sorting nexin-17	62.51	7	4	4	4	914000	473000	12200	2	2	1	1	1		52797
Q8BWU5	Probable tRNA N6-adenosine threonylcarbamoyltransferase	98.12	14	14	6	6	505000	274000	254000	2	2	3	2	2	Oxidation (M); Deamidation (NQ)	36301
Q8BWW4	La-related protein 4	57.09	3	2	3	0	340000	815000		2	2	1	2	0		79763
Q8BX17	Gem-associated protein 5	57.17	2	0	1	1		728000	302000	2	2	0	1	1		166591
Q8BXA1	Golgi integral membrane protein 4	74.96	7	2	2	7	448000	463000	911000	3	3	1	1	3		76785
Q8C0E3	E3 ubiquitin-protein ligase TRIM47	231.55	29	13	13	27	5790000	4250000	8770000	11	11	5	5	11	Carbamidomethylation	69912
Q8C3Y4	Kinetochore-associated protein 1	49.68	2	1	0	1	585000		307000	3	3	2	0	1		250356
Q8C5L7	RNA-binding protein 34	134.46	17	17	9	4	1450000	1660000	1100000	4	4	4	2	1	Carbamidomethylation	41326
Q8C6G8	WD repeat-containing protein 26	60.43	5	0	5	3		697000	369000	2	2	0	3	1	Deamidation (NQ)	70544
Q8C708	Transmembrane protein C16orf54 homolog	64.78	14	0	5	9		218000	449000	2	2	0	1	1		24532
Q8C7V3	U3 small nucleolar RNA-associated protein 15 homolog	86.85	11	5	9	5	47700	689000	1350000	3	3	1	2	2		59375
Q8C863	E3 ubiquitin-protein ligase Itchy	106.02	10	1	5	7	1000000	790000	1400000	5	4	1	3	3		98994
Q8CCF0	U4/U6 small nuclear ribonucleoprotein Prp31	45.59	8	3	8	0	323000	553000		2	2	1	2	0		55430
Q8CFI0	E3 ubiquitin-protein ligase NEDD4-like	170.31	10	3	5	7		454000	840000	9	2	3	6	7	Carbamidomethylation	115419
Q8CFI7	DNA-directed RNA polymerase II subunit RPB2	139.68	8	2	3	6	608000	556000	3200000	6	6	2	3	6	Carbamidomethylation; Pyro-glu from Q	133910
Q8CG47	Structural maintenance of chromosomes protein 4	83.13	4	3	2	1	39600	1000000	763000	3	3	2	1	1	Carbamidomethylation	146894
Q8CG48	Structural maintenance of chromosomes protein 2	64.74	4	3	2	1	404000	763000	483000	3	3	2	2	1	Carbamidomethylation	134239
Q8CG76	Aflatoxin B1 aldehyde reductase member 2	108.8	11	4	3	7	1260000	496000	1450000	3	3	1	1	2		40612
Q8CGB6	Tensin-2	112.76	5	2	2	2	277000	0	306000	4	3	2	2	2	Carbamidomethylation	152012
Q8CGP1	Histone H2B type 1-K	165.03	29	29	29	20	347000000	336000000	216000000	5	5	10	11	9	Oxidation (M); Pyro-glu from Q; Deamidation (NQ)	13920
Q8CGP2	Histone H2B type 1-P	165.03	29	29	29	20	347000000	336000000	216000000	5	5	10	11	9	Oxidation (M); Pyro-glu from Q; Deamidation (NQ)	13992
Q8CGY8	UDP-N-acetylglucosamine--peptide N-acetylglucosaminyltransferase 110 kDa subunit	89.14	7	2	4	0	423000	1040000		5	5	2	3	0	Carbamidomethylation	116952
Q8CI11	Guanine nucleotide-binding protein-like 3	166.68	18	10	16	10	2380000	1010000	1680000	5	5	3	4	2	Carbamidomethylation; Pyro-glu from Q	60787
Q8CI95	Oxysterol-binding protein-related protein 11	48.64	3	2	0	3	384000		383000	2	2	1	0	2		83629
Q8CIF6	SID1 transmembrane family member 2	51.38	5	0	2	3		160000	0	2	2	0	1	1	Carbamidomethylation	94501
Q8JZR6	Electroneutral sodium bicarbonate exchanger 1	60.45	3	0	2	3		104000	129000	2	2	0	1	2		122421
Q8K007	Extracellular sulfatase Sulf-1	87.08	6	6	2	6	316000	112000	275000	2	2	2	1	2	Carbamidomethylation	100923
Q8K019	Bcl-2-associated transcription factor 1	50.43	4	2	4	2	368000	544000	161000	2	2	1	2	1		106002
Q8K021	Secretory carrier-associated membrane protein 1	37.54	10	0	0	10			1130000	2	2	0	0	2		38029
Q8K1S3	Netrin receptor UNC5B	102.58	7	6	4	2	1080000	594000	293000	4	4	3	2	1	Carbamidomethylation; Pyro-glu from Q; Deamidation (NQ)	103739
Q8K1X1	WD repeat-containing protein 11	80.41	5	3	2	4	196000	52700	106000	3	3	2	1	2	Pyro-glu from Q	135937
Q8K224	RNA cytidine acetyltransferase	103.37	4	3	2	3	332000	291000	177000	3	3	2	1	2	Pyro-glu from Q	115418
Q8K274	Ketosamine-3-kinase	119.81	7	7	7	6	1130000	1200000	524000	2	2	2	3	1	Carbamidomethylation	34468
Q8K2J0	1-phosphatidylinositol 4 5-bisphosphate phosphodiesterase delta-3	144.07	14	0	6	11		793000	1440000	5	5	0	2	4	Carbamidomethylation	88607
Q8K2V6	Importin-11	128.93	7	7	7	6	1260000	672000	805000	4	4	5	4	3	Pyro-glu from Q	112416
Q8K310	Matrin-3	86.88	6	3	6	4	1620000	1740000	833000	3	3	2	3	2		94630
Q8K363	ATP-dependent RNA helicase DDX18	118.57	13	6	8	10	133000	576000	691000	5	5	2	3	4	Carbamidomethylation; Deamidation (NQ)	74181
Q8K3W0	BRISC and BRCA1-A complex member 2	59.57	7	0	4	4		350000	101000	2	2	0	1	1		43545
Q8K482	EMILIN-2	103.04	3	1	2	2	484000	261000	215000	2	2	1	2	1		117310
Q8K4B0	Metastasis-associated protein MTA1	105.83	7	7	3	3	1130000	603000	199000	4	3	4	2	1	Pyro-glu from Q; Deamidation (NQ)	80798
Q8QZY9	Splicing factor 3B subunit 4	80.62	9	9	9	0	1860000	1550000		2	2	2	0	0		44356
Q8R0J7	Vacuolar protein sorting-associated protein 37B	190.8	36	31	23	28	4160000	3830000	4680000	6	6	6	6	5	Oxidation (M); Pyro-glu from Q	31056
Q8R0W0	Epiplakin	128.3	1	1	1	1	1360000		17400	5	2	2	2	3	Oxidation (M); Deamidation (NQ)	724747
Q8R105	Vacuolar protein sorting-associated protein 37C	126.59	14	10	4	14	2290000	2350000	4740000	3	3	3	1	3		38453
Q8R138	Transmembrane protein 119	63	15	0	15	14		316000	299000	2	2	0	2	0	Carbamidomethylation; Deamidation (NQ)	29401
Q8R2H9	Phosphoethanolamine/phosphocholine phosphatase	50.29	13	5	8	0	152000	80400		2	2	1	1	0		29911
Q8R2N2	U3 small nucleolar RNA-associated protein 4 homolog	47.68	5	0	5	3		455000	141000	2	2	0	2	1		76909
Q8R4W6	Procollagen C-endopeptidase enhancer 2	79.43	7	3	7	0	160000	1200000		2	2	1	2	0	Carbamidomethylation	45408
Q8R5H1	Ubiquitin carboxyl-terminal hydrolase 15	59.01	5	4	1	1	530000	99000	198000	4	4	3	1	1	Carbamidomethylation	112325
Q8VDP4	Cell cycle and apoptosis regulator protein 2	83.8	7	7	0	3	45000		32800	3	3	3	0	2		103002
Q8VDW0	ATP-dependent RNA helicase DDX39A	166.43	27	17	19	20	3600000	6290000	4090000	11	5	8	7	9	Carbamidomethylation	49067
Q8VE37	Regulator of chromosome condensation	198.28	23	15	9	21	4020000	2360000	5590000	6	6	4	3	6	Carbamidomethylation; Deamidation (NQ)	44931
Q8VE96	Solute carrier family 35 member F6	70.63	11	11	10	0	491000	410000		2	2	3	0	0	Carbamidomethylation	40978
Q8VED5	Keratin type II cytoskeletal 79	107.43	12	4	8	8	18400000	17900000	282000	5	2	4	5	5	Deamidation (NQ)	57552
Q8VEE4	Replication protein A 70 kDa DNA-binding subunit	111.93	20	0	12	10		2130000	3410000	9	9	0	6	4	Carbamidomethylation	69037
Q8VHY0	Chondroitin sulfate proteoglycan 4	105.65	4	2	1	1	398000	213000	0	4	4	2	2	1	Carbamidomethylation	252305
Q91VC3	Eukaryotic initiation factor 4A-III	195.75	31	20	23	22	3040000	6490000	4090000	10	7	6	9	8	Carbamidomethylation	46840
Q91VH6	Protein MEMO1	129.96	29	7	11	22	1700000	2530000	6060000	5	5	2	3	4	Carbamidomethylation	33692
Q91VI7	Ribonuclease inhibitor	278.13	50	37	40	39	7630000	11800000	7090000	14	14	10	12	12	Carbamidomethylation; Deamidation (NQ)	49817
Q91W96	Anaphase-promoting complex subunit 4	74.63	5	4	2	1	233000	0	98200	3	3	2	1	1	Pyro-glu from Q	91708
Q91WB7	Ubiquitin domain-containing protein 1	51.88	21	0	17	21		990000	1290000	2	2	0	0	2	Carbamidomethylation	25985
Q91WG4	Elongator complex protein 2	74.18	5	0	2	5		136000	371000	2	2	0	1	2	Carbamidomethylation	93093
Q91X20	Set1/Ash2 histone methyltransferase complex subunit ASH2	86.98	5	5	0	2	260000		158000	2	2	2	0	1		68250
Q91XY4	Protocadherin gamma-A4	45.89	3	0	2	2		459000	838000	2	2	0	1	1		100358
Q91YT8	CSC1-like protein 1	72.19	5	1	1	5	723000	0	1400000	3	3	1	1	3	Pyro-glu from Q	91860
Q91ZV3	Discoidin CUB and LCCL domain-containing protein 2	86.58	6	2	2	6	157000	154000	565000	2	2	1	1	2	Carbamidomethylation	83774
Q920B9	FACT complex subunit SPT16	130.73	11	5	7	5	1930000	3900000	2660000	7	7	3	5	3	Carbamidomethylation	119825
Q921E2	Ras-related protein Rab-31	75.53	13	13	0	7	1850000		539000	2	2	2	0	1	Carbamidomethylation	21331
Q921F4	Heterogeneous nuclear ribonucleoprotein L-like	77.56	9	5	6	3	56800	436000	273000	3	3	2	2	1	Carbamidomethylation	64125
Q921G8	Gamma-tubulin complex component 2	128.6	6	6	3	3	2030000	1570000	942000	4	4	4	3	2		103223
Q923D4	Splicing factor 3B subunit 5	68.68	33	15	17	0	1490000	0		2	2	1	1	0		10119
Q923T9	Calcium/calmodulin-dependent protein kinase type II subunit gamma	98.25	15	7	7	8	137000	1190000	343000	5	4	2	3	2	Carbamidomethylation	59607
Q99104	Unconventional myosin-Va	100.21	2	0	1	2		101000	301000	3	3	0	1	2	Oxidation (M); Deamidation (NQ)	215536
Q99J99	3-mercaptopyruvate sulfurtransferase	54.74	15	9	6	0	4180000	552000		2	2	1	1	0		33097
Q99K01	Pyridoxal-dependent decarboxylase domain-containing protein 1	45.49	4	2	0	2	184000		196000	2	2	1	0	2		87336
Q99K41	EMILIN-1	164.84	12	12	5	8	2730000	1290000	1180000	7	7	7	4	4	Carbamidomethylation	107585
Q99KN1	Arrestin domain-containing protein 1	189.14	40	19	28	26	5480000	5980000	4800000	8	8	4	6	4	Carbamidomethylation; Deamidation (NQ)	46330
Q99L27	GMP reductase 2	95.36	7	5	5	7	103000	143000	403000	2	2	1	1	2	Carbamidomethylation	38019
Q99LB6	Methionine adenosyltransferase 2 subunit beta	75.93	11	7	0	11	441000		649000	2	2	1	0	3		37393
Q99LE6	ATP-binding cassette sub-family F member 2	42.24	4	4	2	0	895000	316000		2	2	2	1	0		71782
Q99LL5	Periodic tryptophan protein 1 homolog	74.28	7	4	2	2	1490000	861000	967000	2	2	1	1	1		55587
Q99M31	Heat shock 70 kDa protein 14	68.67	8	0	8	3		1100000	935000	2	2	0	2	1		54650
Q99M54	Cell division cycle-associated protein 3	48.15	13	0	6	7		88900	93900	2	2	0	1	1	Pyro-glu from Q	28708
Q99ME2	WD repeat-containing protein 6	40.23	5	3	0	2	452000		112000	2	2	1	0	1	Carbamidomethylation	121898
Q99ME9	Nucleolar GTP-binding protein 1	80.87	5	2	4	3	1080000	2180000	1640000	3	3	1	2	2	Carbamidomethylation	74113
Q99MR6	Serrate RNA effector molecule homolog	99.86	4	3	1	4	558000	795000	3830000	3	3	2	1	3		100452
Q99PP9	Tripartite motif-containing protein 16	75.39	6	4	0	6	306000		1100000	2	2	1	0	2		62943
Q99PU8	ATP-dependent RNA helicase DHX30	70.39	2	1	1	1	38900	95900	80800	2	2	1	1	1		136668
Q9CPT5	Nucleolar protein 16	100.11	19	19	19	19	1070000	1740000	1850000	3	3	2	3	2		21139
Q9CQ39	Mediator of RNA polymerase II transcription subunit 21	52.01	41	0	27	14		94000	39700	3	3	0	2	1		15588
Q9CQ80	Vacuolar protein-sorting-associated protein 25	80.34	23	9	9	14	81000	84800	1770000	4	4	1	1	2		20748
Q9CQM2	ER lumen protein-retaining receptor 2	61.77	16	16	0	10	1010000		37700	2	2	3	0	1		24454
Q9CQR6	Serine/threonine-protein phosphatase 6 catalytic subunit	46.99	10	7	3	0	81300	202000		2	2	1	1	0	Carbamidomethylation	35159
Q9CQW2	ADP-ribosylation factor-like protein 8B	140.94	51	22	40	33	2790000	2270000	858000	8	3	3	6	6	Carbamidomethylation	21539
Q9CR51	V-type proton ATPase subunit G 1	152.11	26	24	24	26	3830000	3950000	3700000	3	3	3	3	4	Carbamidomethylation	13724
Q9CR75	Tumor necrosis factor receptor superfamily member 12A	134.68	33	32	16	33	486000	812000	2570000	5	5	2	2	3	Carbamidomethylation	13641
Q9CSH3	Exosome complex exonuclease RRP44	71.09	6	4	0	2	650000		0	3	3	2	0	1	Carbamidomethylation	108837
Q9CWZ7	Gamma-soluble NSF attachment protein	81.75	10	4	4	10	173000	76800	278000	2	2	1	1	2		34732
Q9CXD9	Leucine-rich repeat-containing protein 17	118.69	12	9	6	6	2910000	823000	2660000	4	4	5	2	3		51852
Q9CXL3	Uncharacterized protein C7orf50 homolog	83.66	22	8	14	0	0	0		2	2	1	1	0		22168
Q9CY66	H/ACA ribonucleoprotein complex subunit 1	54.15	11	0	7	8		2010000	1500000	3	3	0	2	2		23474
Q9CZU3	Exosome RNA helicase MTR4	46.12	3	0	2	1		30400	681000	2	2	0	1	1		117636
Q9CZX0	Elongator complex protein 3	114.33	10	5	7	8	1100000	1380000	2010000	4	4	2	3	3		62385
Q9CZX7	Type 2 phosphatidylinositol 4 5-bisphosphate 4-phosphatase	226.41	44	43	39	39	13500000	10500000	10600000	8	8	8	6	7	Carbamidomethylation	28038
Q9D071	MMS19 nucleotide excision repair protein homolog	72.97	5	4	5	1	102000	226000	86400	3	3	3	3	1	Pyro-glu from Q; Deamidation (NQ)	113089
Q9D0I8	mRNA turnover protein 4 homolog	84.41	17	17	12	6	2300000	4340000	2670000	3	3	4	2	1	Carbamidomethylation	27546
Q9D0R2	Threonine--tRNA ligase cytoplasmic	120.99	12	6	10	6	3440000	4870000	3420000	6	6	3	6	3	Carbamidomethylation	83356
Q9D0T1	NHP2-like protein 1	66.1	31	9	22	22	928000	110000	116000	2	2	1	1	1	Carbamidomethylation	14174
Q9D1A2	Cytosolic non-specific dipeptidase	78.34	4	3	0	4	353000		239000	2	2	1	0	1	Pyro-glu from Q	52767
Q9D1M4	Eukaryotic translation elongation factor 1 epsilon-1	49.88	20	14	0	6	55300		143000	2	2	1	0	1	Pyro-glu from Q	19859
Q9D6X6	Serine protease 23	155.91	16	5	11	13	3650000	2950000	1810000	4	4	2	2	2	Carbamidomethylation	43072
Q9D6Z1	Nucleolar protein 56	232.24	29	20	24	23	12900000	21300000	14200000	13	13	7	13	10	Carbamidomethylation; Deamidation (NQ)	64464
Q9D7A6	Signal recognition particle 19 kDa protein	91.47	27	27	0	0	1140000			2	2	2	0	0	Carbamidomethylation; Pyro-glu from Q	16191
Q9D832	DnaJ homolog subfamily B member 4	66.89	12	8	3	4	2070000	1110000		3	2	2	1	1	Carbamidomethylation	37782
Q9DAW6	U4/U6 small nuclear ribonucleoprotein Prp4	91.46	11	0	8	6		951000	1380000	4	4	0	3	2	Carbamidomethylation	58370
Q9DBH0	NEDD4-like E3 ubiquitin-protein ligase WWP2	105.32	5	4	2	3	765000	420000	492000	3	3	2	1	2		98761
Q9DBR0	A-kinase anchor protein 8	47.46	9	0	7	3		193000	205000	2	2	0	1	1		76294
Q9DBZ5	Eukaryotic translation initiation factor 3 subunit K	95.52	13	6	6	13	2750000	2590000	3110000	2	2	1	1	2		25087
Q9DC53	Copine-8	86.98	9	3	3	6	902000	240000	1450000	4	4	1	1	3		64667
Q9DCE5	p21-activated protein kinase-interacting protein 1	122.51	16	8	8	16	2170000	1220000	1760000	4	4	2	2	4		42116
Q9DCK3	Tetraspanin-4	146.69	20	20	20	11	19800000	25900000	7340000	2	2	3	2	1	Carbamidomethylation; Deamidation (NQ)	26054
Q9EPK7	Exportin-7	122.74	7	3	7	1	421000	1190000	463000	4	4	3	4	1	Carbamidomethylation; Deamidation (NQ)	123810
Q9EPR4	Solute carrier family 23 member 2	135.76	8	5	6	6	426000	1160000	1210000	3	3	2	2	2		70049
Q9EPU0	Regulator of nonsense transcripts 1	184.22	15	7	8	10	3980000	6140000	5330000	12	12	7	7	7		123967
Q9EPU4	Cleavage and polyadenylation specificity factor subunit 1	106.33	4	3	4	1	481000	701000	325000	3	3	3	3	1	Carbamidomethylation	160818
Q9EQT6	Synaptotagmin-13	116.9	22	14	13	0	810000	503000		4	4	4	2	0	Carbamidomethylation; Deamidation (NQ)	46870
Q9ES00	Ubiquitin conjugation factor E4 B	71.64	2	0	1	1		480000	651000	2	2	0	1	1	Carbamidomethylation	133317
Q9ESV0	ATP-dependent RNA helicase DDX24	60.1	4	2	2	0	111000	32000		2	2	1	1	0	Carbamidomethylation	96429
Q9JIF7	Coatomer subunit beta	235.25	27	22	16	16	16500000	8770000	12500000	15	15	14	8	10	Carbamidomethylation; Deamidation (NQ)	107066
Q9JJ80	Ribosome production factor 2 homolog	42.48	8	0	8	0		2400000		2	2	0	2	0		35364
Q9JJA4	Ribosome biogenesis protein WDR12	111.22	10	6	10	6	413000	749000	527000	2	2	1	2	1		47347
Q9JJY4	Probable ATP-dependent RNA helicase DDX20	168.74	11	7	4	5	856000	767000	555000	5	5	3	2	2	Carbamidomethylation; Pyro-glu from Q	91710
Q9JK23	Proteasome assembly chaperone 1	58.95	10	10	5	5	183000	236000	260000	2	2	2	1	1	Carbamidomethylation	33104
Q9JKZ2	Sodium/myo-inositol cotransporter	54.07	4	0	2	2		116000	853000	2	2	0	1	1	Carbamidomethylation	79583
Q9JLN9	Serine/threonine-protein kinase mTOR	131.38	4	1	2	3	447000	667000	343000	7	7	2	3	5	Pyro-glu from Q	288788
Q9JM52	Misshapen-like kinase 1	110.46	4	3	2	2	967000	1170000	214000	5	2	4	3	3		147294
Q9JMH9	Unconventional myosin-XVIIIa	59.2	2	1	1	1	240000	120000	332000	3	3	1	1	1		232753
Q9QWL7	Keratin type I cytoskeletal 17	157.34	22	12	10	14	418000	355000	663000	10	2	7	6	5	Deamidation (NQ)	48162
Q9QXB9	Developmentally-regulated GTP-binding protein 2	188.43	29	18	23	23	4400000	8270000	14600000	8	8	5	8	7	Carbamidomethylation	40718
Q9QXY6	EH domain-containing protein 3	220.85	28	21	23	19	341000	11700		15	2	12	14	14	Deamidation (NQ)	60821
Q9QY33	Tetraspanin-3	68.36	6	6	6	6	4290000	506000	498000	2	2	2	1	1		28049
Q9QY73	Transmembrane protein 59	122.74	8	5	5	8	878000	6280000	8050000	2	2	1	2	3		36314
Q9QYH6	Melanoma-associated antigen D1	79.95	4	2	0	2	38100		47700	2	2	2	0	1		85670
Q9QYJ3	DnaJ homolog subfamily B member 1	69.15	9	6	3	4	1200000	691000		3	2	2	1	1	Carbamidomethylation	38167
Q9QZ06	Toll-interacting protein	91.89	10	10	5	5	2780000	2040000	1350000	2	2	2	1	1		30345
Q9QZI9	Serine incorporator 3	81.54	5	0	3	5		1350000	4570000	3	3	0	1	3	Carbamidomethylation	52623
Q9QZQ8	Core histone macro-H2A.1	166.44	34	17	27	25	1850000	2180000	1740000	8	6	4	5	5	Pyro-glu from Q; Deamidation (NQ)	39735
Q9R0E1	Multifunctional procollagen lysine hydroxylase and glycosyltransferase LH3	80.69	8	2	4	4	138000	24700	9730000	4	4	1	2	2	Pyro-glu from Q	84922
Q9R0E2	Procollagen-lysine 2-oxoglutarate 5-dioxygenase 1	94.18	7	0	2	5		0	619000	3	3	0	1	2		83595
Q9R0L6	Pericentriolar material 1 protein	80.73	1	0	1	0		99900		2	2	0	2	0		228845
Q9R0N0	Galactokinase	174.37	33	13	22	21	1890000	2120000	6000000	8	8	3	5	6	Carbamidomethylation	42295
Q9R0P3	S-formylglutathione hydrolase	265.07	61	58	61	41	57400000	70300000	56300000	9	9	12	14	11	Carbamidomethylation; Deamidation (NQ)	31320
Q9R0Q7	Prostaglandin E synthase 3	138.42	26	26	19	26	11100000	10800000	10800000	3	3	3	2	3	Carbamidomethylation	18721
Q9R118	Serine protease HTRA1	276.35	39	32	37	27	26700000	36200000	19100000	16	16	15	15	10	Carbamidomethylation	51214
Q9R1B9	Slit homolog 2 protein	54.54	2	1	1	1	0	480000	314000	2	2	1	1	1		168782
Q9R1C7	Pre-mRNA-processing factor 40 homolog A	54.81	3	3	0	2	1030000		168000	2	2	2	0	1	Pyro-glu from Q	108481
Q9WUA3	ATP-dependent 6-phosphofructokinase platelet type	187.7	20	14	10	15	1170000	1700000	3530000	11	9	7	5	9	Carbamidomethylation	85455
Q9WV60	Glycogen synthase kinase-3 beta	192.35	30	22	22	25	3730000	3660000	5140000	7	7	4	4	9	Deamidation (NQ)	46710
Q9WVM3	Anaphase-promoting complex subunit 7	105.41	7	7	7	7	791000	940000	832000	2	2	2	2	2	Carbamidomethylation	63021
Q9Z1E4	Glycogen [starch] synthase muscle	136.94	10	6	1	9	1620000	326000	1920000	4	4	2	1	3		83927
Q9Z2D8	Methyl-CpG-binding domain protein 3	52.32	6	5	0	6	339000		338000	2	2	1	0	2		32168
Q9Z2H5	Band 4.1-like protein 1	142.57	8	7	5	7	3400000	1830000	5030000	6	5	5	4	5	Carbamidomethylation	98315
Q9Z2N8	Actin-like protein 6A	76.44	16	10	16	0	2960000	4690000		4	4	2	4	0		47448
S4R1M9	Oxysterol-binding protein-related protein 10	48.64	3	2	0	3	384000		383000	2	2	1	0	2		83856
